# Supplementary material for: Experimental interpretation of adequate weight-metric combination for dynamic user-based collaborative filtering
Source: PeerJ Comput Sci. 2021 Dec 9;7:e784. doi: 10.7717/peerj-cs.784 (PMC11566190; doi:10.7717/peerj-cs.784)
Supplement: Supplemental Information 1 — Detailed results including all the neighbors from the top performing to the least performing metrics. This can easily be adapted by filtering and sorting the fields. [file peerj-cs-07-784-s001.xlsx]

## Sheet: ML100K
brief file_supplementary#1.a.1: all data title Experimental Interpretation of Adequate Weight-Metric Combination for Dynamic User-Based Collaborative Filtering authors @savasokyay, @sercanaygun testname CF_nIOI_sw version v2.2.15 (plus, some non-technical and textual enhancements from the current version v3.3) dataset ML100K rsltInfo The mean results of multiple test runs are computed. The indivi…
origin	equationName	abbreviation	sigWeCoRatedCount	dynamic	significance weighting	Best Neighbors Count	Markedness	Informedness	Matthews Correlation	F1-Measure	MAEint	MSEint	RMSEint	MAEthr	MSEthr	RMSEthr	Accuracy Exact	Accuracy Threshold	Accuracy Balanced	Fowlkes Mallows Index	Prevalence Threshold	Threat Score	Precision	Inverse Precision	Recall/ Sensitivity	Specificity	Fallout	MissRate	False Discovery Rate	False Omission Rate	Error	Coverage	Exact Prediction	True Positive	False Positive	False Negative	True Negative
COS	Standard Cosine	COS	-1			17	0.4197	0.390927	0.405057	0.767122	0.700026	0.985221	0.992536	0.285933	0.285933	0.534694	0.426645	0.714067	0.695464	0.768511	0.419174	0.622259	0.723844	0.695856	0.815961	0.574967	0.425033	0.184039	0.276156	0.304144	3.12	0.999338	2010.3	2219.38	846.68	500.6	1145.22
COS	Standard Cosine	COS	-1			26	0.420831	0.394037	0.407211	0.767072	0.697828	0.979847	0.989821	0.285045	0.285045	0.533859	0.427438	0.714955	0.697018	0.768323	0.417895	0.622199	0.725935	0.694896	0.813219	0.580818	0.419182	0.186781	0.274065	0.305104	3.12	0.999338	2014.04	2211.92	835.04	508.06	1156.86
COS	Standard Cosine	COS	-1			25	0.420593	0.393491	0.406814	0.767064	0.698171	0.980657	0.990233	0.285207	0.285207	0.53401	0.427396	0.714793	0.696746	0.768336	0.418112	0.622189	0.725579	0.695014	0.81364	0.579851	0.420149	0.18636	0.274421	0.304986	3.12	0.999338	2013.84	2213.08	836.96	506.9	1154.94
COS	Standard Cosine	COS	-1			21	0.41995	0.391934	0.405698	0.767047	0.699067	0.982207	0.991015	0.285674	0.285674	0.534456	0.426793	0.714326	0.695967	0.768383	0.418735	0.622157	0.724565	0.695385	0.814879	0.577055	0.422945	0.185121	0.275435	0.304615	3.12	0.999338	2011	2216.44	842.52	503.54	1149.38
COS	Standard Cosine	COS	-1			22	0.420024	0.392417	0.405984	0.766981	0.698927	0.981956	0.990888	0.285563	0.285563	0.534347	0.426908	0.714437	0.696208	0.768289	0.418509	0.622076	0.724932	0.695092	0.814268	0.578149	0.421851	0.185732	0.275068	0.304908	3.12	0.999338	2011.54	2214.78	840.34	505.2	1151.56
COS	Standard Cosine	COS	-1			24	0.420176	0.392881	0.406297	0.766969	0.698549	0.98157	0.990693	0.285432	0.285432	0.534223	0.427248	0.714568	0.69644	0.768255	0.418316	0.62206	0.725251	0.694925	0.813835	0.579045	0.420955	0.186165	0.274749	0.305075	3.12	0.999338	2013.14	2213.6	838.54	506.38	1153.36
COS	Standard Cosine	COS	-1			15	0.41914	0.39043	0.404528	0.76689	0.700922	0.987067	0.993466	0.286187	0.286187	0.534933	0.426038	0.713813	0.695215	0.768276	0.419278	0.621955	0.723678	0.695462	0.81565	0.574779	0.425221	0.18435	0.276322	0.304538	3.12	0.999338	2007.44	2218.54	847.04	501.44	1144.86
COS	Standard Cosine	COS	-1			23	0.419773	0.392267	0.405785	0.766866	0.699067	0.982453	0.99114	0.285665	0.285665	0.534441	0.426955	0.714335	0.696134	0.768169	0.418519	0.621925	0.724914	0.694859	0.814034	0.578233	0.421767	0.185966	0.275086	0.305141	3.12	0.999338	2011.76	2214.14	840.18	505.84	1151.72
COS	Standard Cosine	COS	-1			27	0.420271	0.393581	0.406705	0.766848	0.697904	0.980051	0.989926	0.285283	0.285283	0.534083	0.427405	0.714717	0.696791	0.768093	0.417983	0.621904	0.725795	0.694475	0.812884	0.580697	0.419303	0.187116	0.274205	0.305525	3.12	0.999338	2013.88	2211.02	835.26	508.96	1156.64
COS	Standard Cosine	COS	-1			18	0.419133	0.390843	0.404739	0.766815	0.7004	0.985713	0.992778	0.286111	0.286111	0.534862	0.426356	0.713889	0.695422	0.768174	0.419074	0.621853	0.724009	0.695124	0.815062	0.575781	0.424219	0.184938	0.275991	0.304876	3.12	0.999338	2008.94	2216.92	845.06	503.06	1146.84
COS	Standard Cosine	COS	-1			28	0.420154	0.393572	0.406643	0.76678	0.697722	0.979978	0.989887	0.285325	0.285325	0.534121	0.427553	0.714675	0.696786	0.76802	0.417955	0.621814	0.725838	0.694316	0.812686	0.580886	0.419114	0.187314	0.274162	0.305684	3.12	0.999338	2014.58	2210.46	834.9	509.52	1157
COS	Standard Cosine	COS	-1			19	0.419005	0.390682	0.404594	0.766772	0.700213	0.985526	0.992689	0.286179	0.286179	0.534923	0.426509	0.713821	0.695341	0.768134	0.41912	0.6218	0.72393	0.695075	0.815067	0.575615	0.424385	0.184933	0.27607	0.304925	3.12	0.999338	2009.66	2216.94	845.4	503.04	1146.5
COS	Standard Cosine	COS	-1			20	0.419047	0.390884	0.404719	0.766757	0.700319	0.985225	0.992537	0.286124	0.286124	0.534871	0.426242	0.713876	0.695442	0.768107	0.419034	0.621781	0.724074	0.694973	0.814844	0.57604	0.42396	0.185156	0.275926	0.305027	3.12	0.999338	2008.4	2216.34	844.54	503.64	1147.36
COS	Standard Cosine	COS	-1			16	0.418745	0.390147	0.404191	0.76674	0.701028	0.986919	0.993393	0.286349	0.286349	0.535086	0.42591	0.713651	0.695073	0.76812	0.419327	0.621755	0.723597	0.695149	0.81541	0.574737	0.425263	0.18459	0.276403	0.304851	3.12	0.999338	2006.84	2217.88	847.14	502.1	1144.76
COS	Standard Cosine	COS	-1			14	0.418691	0.389994	0.404085	0.766734	0.701147	0.988234	0.994052	0.286395	0.286395	0.535127	0.426093	0.713605	0.694997	0.768122	0.419386	0.621751	0.723497	0.695193	0.815526	0.574468	0.425532	0.184474	0.276503	0.304807	3.12	0.999338	2007.7	2218.2	847.68	501.78	1144.22
COS	Standard Cosine	COS	-1			13	0.418584	0.389995	0.404034	0.766679	0.701758	0.989652	0.994763	0.286425	0.286425	0.535157	0.425957	0.713575	0.694997	0.76806	0.419358	0.621674	0.723546	0.695038	0.815342	0.574653	0.425347	0.184658	0.276454	0.304962	3.12	0.999338	2007.06	2217.68	847.3	502.3	1144.6
COS	Standard Cosine	COS	-1			12	0.418158	0.389515	0.40358	0.766532	0.703014	0.993005	0.996454	0.286637	0.286637	0.535355	0.425512	0.713363	0.694757	0.767918	0.419491	0.621481	0.723331	0.694827	0.815285	0.57423	0.42577	0.184715	0.276669	0.305173	3.12	0.999338	2004.96	2217.52	848.14	502.46	1143.76
COS	Standard Cosine	COS	-1			30	0.4197	0.393638	0.406458	0.766502	0.697543	0.980284	0.990041	0.28544	0.28544	0.53423	0.427982	0.71456	0.696819	0.767709	0.417805	0.621447	0.726088	0.693612	0.811746	0.581892	0.418108	0.188254	0.273912	0.306388	3.12	0.999338	2016.6	2207.9	832.88	512.08	1159.02
COS	Standard Cosine	COS	-1			29	0.419465	0.393314	0.406176	0.766434	0.69798	0.980407	0.990103	0.285572	0.285572	0.534352	0.427383	0.714428	0.696657	0.767648	0.417908	0.621359	0.725915	0.69355	0.811814	0.5815	0.4185	0.188186	0.274085	0.30645	3.12	0.999338	2013.78	2208.08	833.68	511.9	1158.22
COS	Standard Cosine	COS	-1			31	0.418982	0.393147	0.405857	0.766196	0.697267	0.979728	0.989756	0.285737	0.285737	0.534508	0.428122	0.714263	0.696574	0.76739	0.417872	0.621044	0.725976	0.693006	0.811197	0.58195	0.41805	0.188803	0.274024	0.306994	3.12	0.999338	2017.26	2206.4	832.78	513.58	1159.12
COS	Standard Cosine	COS	-1			32	0.418142	0.392735	0.405238	0.76579	0.697412	0.980025	0.989902	0.286055	0.286055	0.534804	0.428122	0.713945	0.696368	0.76696	0.417858	0.620513	0.725997	0.692145	0.810264	0.582472	0.417528	0.189736	0.274003	0.307855	3.12	0.999338	2017.26	2203.86	831.74	516.12	1160.16
COS	Standard Cosine	COS	-1			33	0.418009	0.392624	0.405115	0.765737	0.697611	0.980097	0.989941	0.286111	0.286111	0.534858	0.427812	0.713889	0.696312	0.766904	0.417881	0.620441	0.725965	0.692043	0.810181	0.582443	0.417557	0.189819	0.274035	0.307957	3.12	0.999338	2015.8	2203.64	831.78	516.34	1160.12
COS	Standard Cosine	COS	-1			34	0.418019	0.392835	0.405229	0.765694	0.697671	0.97997	0.989878	0.286072	0.286072	0.534823	0.427689	0.713928	0.696417	0.766849	0.417774	0.620384	0.726137	0.691883	0.809874	0.58296	0.41704	0.190126	0.273863	0.308117	3.12	0.999338	2015.22	2202.8	830.76	517.18	1161.14
COS	Standard Cosine	COS	-1			11	0.415205	0.386821	0.400759	0.76543	0.705315	0.997283	0.998598	0.287966	0.287966	0.536596	0.424132	0.712034	0.69341	0.76681	0.420089	0.620034	0.722341	0.692864	0.814046	0.572775	0.427225	0.185954	0.277659	0.307136	3.12	0.999338	1998.46	2214.18	851.06	505.8	1140.84
COS	Standard Cosine	COS	-1			35	0.417104	0.392269	0.404494	0.765273	0.697722	0.979953	0.989872	0.286442	0.286442	0.535168	0.427587	0.713558	0.696135	0.766407	0.41782	0.619832	0.72606	0.691043	0.809026	0.583244	0.416756	0.190974	0.27394	0.308957	3.12	0.999338	2014.74	2200.5	830.2	519.48	1161.7
COS	Standard Cosine	COS	-1			10	0.414251	0.385483	0.399606	0.765173	0.706919	1.00212	1.00102	0.288475	0.288475	0.537068	0.423928	0.711525	0.692741	0.766581	0.420506	0.619699	0.721658	0.692592	0.814326	0.571156	0.428844	0.185674	0.278342	0.307408	3.12	0.999338	1997.5	2214.96	854.24	505.02	1137.66
COS	Standard Cosine	COS	-1			36	0.41636	0.391773	0.403878	0.764943	0.698316	0.980827	0.990314	0.286747	0.286747	0.535453	0.427074	0.713253	0.695886	0.766063	0.417876	0.619401	0.725966	0.690394	0.808404	0.583369	0.416631	0.191596	0.274034	0.309606	3.12	0.999338	2012.32	2198.82	829.96	521.16	1161.94
COS	Standard Cosine	COS	-1			37	0.416327	0.391909	0.403932	0.764881	0.698566	0.981214	0.99051	0.286735	0.286735	0.53544	0.426929	0.713265	0.695955	0.76599	0.417794	0.619321	0.726103	0.690224	0.808097	0.583813	0.416187	0.191903	0.273897	0.309776	3.12	0.999338	2011.64	2197.98	829.06	522	1162.84
COS	Standard Cosine	COS	-1			9	0.413372	0.384701	0.398776	0.764839	0.709229	1.00604	1.00296	0.288874	0.288874	0.537436	0.422124	0.711126	0.692351	0.766247	0.420669	0.619265	0.721379	0.691993	0.813936	0.570765	0.429235	0.186064	0.278621	0.308007	3.12	0.999338	1989	2213.9	855.06	506.08	1136.84
COS	Standard Cosine	COS	-1			39	0.416323	0.392535	0.404253	0.764723	0.69832	0.980441	0.990118	0.286629	0.286629	0.535341	0.426891	0.713371	0.696268	0.76579	0.417466	0.619112	0.726638	0.689686	0.807082	0.585454	0.414546	0.192918	0.273362	0.310314	3.12	0.999338	2011.46	2195.22	825.8	524.76	1166.1
COS	Standard Cosine	COS	-1			40	0.416357	0.392668	0.404337	0.76471	0.698498	0.980331	0.990061	0.286595	0.286595	0.535308	0.426594	0.713405	0.696334	0.76577	0.417405	0.619096	0.726739	0.689619	0.806927	0.585741	0.414259	0.193073	0.273261	0.310381	3.12	0.999338	2010.06	2194.8	825.22	525.18	1166.68
COS	Standard Cosine	COS	-1			38	0.416079	0.392035	0.403877	0.764704	0.698435	0.980361	0.990074	0.286786	0.286786	0.535489	0.426751	0.713214	0.696018	0.765789	0.417663	0.619086	0.726317	0.689763	0.807435	0.5846	0.4154	0.192565	0.273683	0.310237	3.12	0.999338	2010.8	2196.18	827.5	523.8	1164.4
COS	Standard Cosine	COS	-1			41	0.415746	0.39219	0.403795	0.764451	0.698596	0.980454	0.990124	0.286858	0.286858	0.535556	0.426475	0.713142	0.696095	0.765505	0.417484	0.618757	0.726609	0.689138	0.806512	0.585679	0.414321	0.193488	0.273391	0.310862	3.12	0.999338	2009.5	2193.68	825.34	526.3	1166.56
COS	Standard Cosine	COS	-1			42	0.41511	0.391643	0.403204	0.764201	0.699165	0.981074	0.990435	0.287142	0.287142	0.535821	0.425945	0.712858	0.695821	0.765251	0.417598	0.618428	0.726422	0.688687	0.806183	0.58546	0.41454	0.193817	0.273578	0.311313	3.12	0.999338	2007	2192.78	825.78	527.2	1166.12
COS	Standard Cosine	COS	-1			43	0.414551	0.391264	0.402737	0.763947	0.699335	0.98104	0.990419	0.287376	0.287376	0.53604	0.425728	0.712624	0.695632	0.764988	0.417642	0.618095	0.726353	0.688198	0.805706	0.585558	0.414442	0.194294	0.273647	0.311802	3.12	0.999338	2005.98	2191.48	825.58	528.5	1166.32
COS	Standard Cosine	COS	-1			45	0.4142	0.391207	0.402538	0.763744	0.699823	0.981876	0.990844	0.28749	0.28749	0.536149	0.42538	0.71251	0.695603	0.764766	0.417574	0.617827	0.726463	0.687738	0.805115	0.586091	0.413909	0.194885	0.273537	0.312262	3.12	0.999338	2004.34	2189.88	824.52	530.1	1167.38
COS	Standard Cosine	COS	-1			44	0.414135	0.391167	0.402485	0.763713	0.699636	0.981715	0.990761	0.287516	0.287516	0.536175	0.425609	0.712484	0.695583	0.764734	0.417579	0.617784	0.72646	0.687675	0.805051	0.586116	0.413884	0.194949	0.27354	0.312325	3.12	0.999338	2005.42	2189.7	824.46	530.28	1167.44
COS	Standard Cosine	COS	-1			8	0.410189	0.381894	0.395786	0.763626	0.712535	1.01327	1.00656	0.290296	0.290296	0.53876	0.420439	0.709704	0.690947	0.765022	0.421269	0.617672	0.720394	0.689795	0.812448	0.569446	0.430554	0.187552	0.279606	0.310205	3.12	0.999338	1981.06	2209.82	857.68	510.16	1134.22
COS	Standard Cosine	COS	-1			46	0.413624	0.390745	0.40202	0.7635	0.699878	0.982288	0.991054	0.287745	0.287745	0.536388	0.425558	0.712255	0.695373	0.764517	0.417655	0.617505	0.726333	0.68729	0.804737	0.586008	0.413992	0.195263	0.273667	0.31271	3.12	0.999338	2005.18	2188.84	824.68	531.14	1167.22
COS	Standard Cosine	COS	-1			47	0.412831	0.390363	0.401438	0.763095	0.700256	0.982946	0.991385	0.28805	0.28805	0.536671	0.425346	0.71195	0.695182	0.764087	0.417632	0.616978	0.72637	0.686462	0.803793	0.586571	0.413429	0.196207	0.27363	0.313538	3.12	0.999338	2004.18	2186.28	823.56	533.7	1168.34
COS	Standard Cosine	COS	-1			48	0.411808	0.389489	0.400491	0.762684	0.700638	0.983616	0.991722	0.288509	0.288509	0.537099	0.425062	0.711491	0.694744	0.763671	0.417811	0.61644	0.726075	0.685733	0.803243	0.586246	0.413754	0.196757	0.273925	0.314267	3.12	0.999338	2002.84	2184.78	824.22	535.2	1167.68
COS	Standard Cosine	COS	-1			7	0.407529	0.379788	0.393411	0.762555	0.717153	1.02567	1.0127	0.291438	0.291438	0.539822	0.419094	0.708562	0.689894	0.763923	0.421651	0.616269	0.719765	0.687764	0.810823	0.568964	0.431036	0.189177	0.280235	0.312236	3.12	0.999338	1974.72	2205.4	858.64	514.58	1133.26
COS	Standard Cosine	COS	65535		ü	23	0.40637	0.377186	0.391504	0.762497	0.711949	1.0189	1.00935	0.292231	0.292231	0.540559	0.423271	0.707769	0.688593	0.763971	0.422638	0.616189	0.718141	0.688229	0.812755	0.564431	0.435569	0.187245	0.281859	0.311771	3.12	0.999338	1994.4	2210.64	867.62	509.34	1124.28
COS	Standard Cosine	COS	-1			49	0.41145	0.389322	0.400231	0.762495	0.700888	0.984376	0.992102	0.288649	0.288649	0.537228	0.425066	0.711351	0.694661	0.76347	0.417797	0.616194	0.726098	0.685352	0.802795	0.586527	0.413473	0.197205	0.273902	0.314648	3.12	0.999338	2002.86	2183.56	823.66	536.42	1168.24
COS	Standard Cosine	COS	-1			50	0.41149	0.389567	0.400377	0.762453	0.700888	0.984342	0.992086	0.288598	0.288598	0.53718	0.42496	0.711402	0.694783	0.763416	0.417676	0.61614	0.726294	0.685196	0.802465	0.587102	0.412898	0.197535	0.273706	0.314804	3.12	0.999338	2002.36	2182.66	822.52	537.32	1169.38
COS	Standard Cosine	COS	65535		ü	18	0.404805	0.373343	0.388753	0.762447	0.715324	1.02768	1.0137	0.29339	0.29339	0.541625	0.422023	0.70661	0.686671	0.764092	0.424089	0.616129	0.715723	0.689082	0.815757	0.557586	0.442414	0.184243	0.284277	0.310918	3.12	0.999338	1988.52	2218.82	881.26	501.16	1110.64
COS	Standard Cosine	COS	65535		ü	24	0.406372	0.377511	0.391674	0.762432	0.711122	1.01709	1.00845	0.292168	0.292168	0.540497	0.423623	0.707832	0.688756	0.763883	0.422482	0.616105	0.718397	0.687975	0.812277	0.565234	0.434766	0.187723	0.281603	0.312025	3.12	0.999338	1996.06	2209.34	866.02	510.64	1125.88
COS	Standard Cosine	COS	65535		ü	22	0.405739	0.376185	0.39068	0.762358	0.712594	1.02058	1.01018	0.292592	0.292592	0.540893	0.42305	0.707408	0.688093	0.76386	0.422968	0.616006	0.717595	0.688145	0.813135	0.56305	0.43695	0.186865	0.282405	0.311855	3.12	0.999338	1993.36	2211.68	870.36	508.3	1121.54
COS	Standard Cosine	COS	65535		ü	21	0.405438	0.375557	0.390209	0.762327	0.713329	1.02177	1.01078	0.292796	0.292796	0.541078	0.422515	0.707204	0.687779	0.763855	0.423196	0.615969	0.71721	0.688228	0.813561	0.561996	0.438004	0.186439	0.28279	0.311772	3.12	0.999338	1990.84	2212.84	872.48	507.14	1119.42
COS	Standard Cosine	COS	65535		ü	17	0.404163	0.372256	0.387879	0.762317	0.715931	1.029	1.01434	0.293776	0.293776	0.541983	0.421751	0.706224	0.686128	0.763997	0.42445	0.615956	0.715122	0.689041	0.816242	0.556014	0.443986	0.183758	0.284878	0.310959	3.12	0.999338	1987.24	2220.14	884.4	499.84	1107.5
COS	Standard Cosine	COS	65535		ü	19	0.404631	0.373662	0.388836	0.762282	0.7145	1.02542	1.01257	0.293382	0.293382	0.541617	0.422261	0.706618	0.686831	0.763893	0.423903	0.615912	0.716032	0.688599	0.814983	0.558679	0.441321	0.185017	0.283968	0.311401	3.12	0.999338	1989.64	2216.7	879.1	503.28	1112.8
COS	Standard Cosine	COS	65535		ü	20	0.404874	0.374387	0.389329	0.762261	0.714169	1.02386	1.01181	0.293174	0.293174	0.541429	0.422235	0.706826	0.687193	0.763835	0.423621	0.615882	0.716506	0.688368	0.814318	0.560069	0.439931	0.185682	0.283494	0.311632	3.12	0.999338	1989.52	2214.9	876.32	505.08	1115.58
COS	Standard Cosine	COS	-1			51	0.411032	0.389217	0.399974	0.762261	0.701219	0.984826	0.992333	0.288798	0.288798	0.537367	0.424667	0.711202	0.694608	0.763219	0.417733	0.615887	0.726197	0.684834	0.802158	0.587059	0.412941	0.197842	0.273803	0.315166	3.12	0.999338	2000.98	2181.82	822.62	538.16	1169.28
COS	Standard Cosine	COS	65535		ü	25	0.406263	0.377941	0.391844	0.76226	0.710689	1.01599	1.00791	0.292121	0.292121	0.540454	0.423712	0.707879	0.68897	0.763672	0.422243	0.615881	0.718793	0.68747	0.811384	0.566557	0.433443	0.188616	0.281207	0.31253	3.12	0.999338	1996.48	2206.92	863.38	513.06	1128.52
COS	Standard Cosine	COS	65535		ü	16	0.403567	0.371385	0.387139	0.762171	0.717111	1.03164	1.01565	0.294099	0.294099	0.542282	0.421204	0.705901	0.685693	0.763873	0.424722	0.615765	0.714675	0.688892	0.816482	0.554903	0.445097	0.183518	0.285325	0.311108	3.12	0.999338	1984.66	2220.8	886.58	499.18	1105.32
COS	Standard Cosine	COS	65535		ü	15	0.403036	0.370454	0.386399	0.762078	0.718562	1.03485	1.01722	0.294422	0.294422	0.542579	0.420627	0.705578	0.685227	0.763813	0.425032	0.615643	0.714155	0.688881	0.816947	0.553507	0.446493	0.183053	0.285845	0.311119	3.12	0.999338	1981.94	2222.06	889.36	497.92	1102.54
COS	Standard Cosine	COS	-1			52	0.41051	0.388952	0.399584	0.761989	0.701291	0.98528	0.992559	0.289001	0.289001	0.537555	0.424739	0.710999	0.694476	0.76293	0.417724	0.615535	0.726213	0.684298	0.801533	0.587418	0.412582	0.198467	0.273787	0.315702	3.12	0.999338	2001.32	2180.14	821.9	539.84	1170
COS	Standard Cosine	COS	65535		ü	27	0.405737	0.378119	0.391682	0.761911	0.710506	1.01488	1.00736	0.292244	0.292244	0.540569	0.423589	0.707756	0.689059	0.763279	0.422029	0.615424	0.719144	0.686593	0.810155	0.567964	0.432036	0.189845	0.280856	0.313407	3.12	0.999338	1995.9	2203.56	860.6	516.42	1131.3
COS	Standard Cosine	COS	65535		ü	26	0.405487	0.377533	0.391258	0.761899	0.710931	1.01569	1.00776	0.292418	0.292418	0.54073	0.423313	0.707582	0.688767	0.763289	0.422256	0.615409	0.718772	0.686714	0.810592	0.566941	0.433059	0.189408	0.281228	0.313286	3.12	0.999338	1994.6	2204.76	862.62	515.22	1129.28
COS	Standard Cosine	COS	65535		ü	30	0.405917	0.378891	0.392169	0.761834	0.70967	1.01266	1.00625	0.292049	0.292049	0.540385	0.423801	0.707951	0.689445	0.763158	0.421694	0.615326	0.719699	0.686219	0.809269	0.569622	0.430378	0.190731	0.280301	0.313781	3.12	0.999338	1996.9	2201.16	857.28	518.82	1134.62
COS	Standard Cosine	COS	-1			53	0.410194	0.388766	0.399334	0.761829	0.70169	0.985798	0.99282	0.289133	0.289133	0.537678	0.424378	0.710867	0.694383	0.762764	0.417732	0.615327	0.726201	0.683993	0.801197	0.587569	0.412431	0.198803	0.273799	0.316007	3.12	0.999338	1999.62	2179.22	821.6	540.76	1170.3
COS	Standard Cosine	COS	65535		ü	31	0.406061	0.379305	0.392453	0.761819	0.709818	1.0125	1.00618	0.291939	0.291939	0.540283	0.423526	0.708061	0.689653	0.763125	0.421527	0.615306	0.719974	0.686087	0.808893	0.570412	0.429588	0.191107	0.280026	0.313913	3.12	0.999338	1995.6	2200.12	855.72	519.86	1136.18
COS	Standard Cosine	COS	65535		ü	28	0.405412	0.377918	0.391421	0.76177	0.710548	1.01465	1.00724	0.292367	0.292367	0.540681	0.423347	0.707633	0.688959	0.763128	0.422049	0.615241	0.719114	0.686297	0.809865	0.568053	0.431947	0.190135	0.280886	0.313703	3.12	0.999338	1994.76	2202.78	860.4	517.2	1131.5
COS	Standard Cosine	COS	65535		ü	29	0.40561	0.378448	0.391791	0.76175	0.710145	1.01383	1.00684	0.292223	0.292223	0.540547	0.423666	0.707777	0.689224	0.763085	0.421835	0.615216	0.719465	0.686145	0.809382	0.569066	0.430934	0.190618	0.280535	0.313855	3.12	0.999338	1996.26	2201.46	858.4	518.52	1133.5
COS	Standard Cosine	COS	65535		ü	14	0.401846	0.368973	0.385057	0.76172	0.720061	1.03865	1.01908	0.295033	0.295033	0.543144	0.420019	0.704967	0.684486	0.763481	0.425452	0.615176	0.713454	0.688392	0.81704	0.551933	0.448067	0.18296	0.286546	0.311608	3.12	0.999338	1979.08	2222.32	892.5	497.66	1099.4
COS	Standard Cosine	COS	-1			54	0.409885	0.388569	0.399083	0.761687	0.701771	0.985743	0.99279	0.28926	0.28926	0.537792	0.424238	0.71074	0.694285	0.762615	0.417748	0.615144	0.72617	0.683715	0.800917	0.587652	0.412348	0.199083	0.27383	0.316285	3.12	0.999338	1998.96	2178.46	821.44	541.52	1170.46
COS	Standard Cosine	COS	65535		ü	32	0.405486	0.378911	0.391971	0.761576	0.709725	1.0126	1.00622	0.292172	0.292172	0.540495	0.423725	0.707828	0.689455	0.762872	0.421575	0.614992	0.71989	0.685595	0.808449	0.570462	0.429538	0.191551	0.28011	0.314405	3.12	0.999338	1996.54	2198.92	855.62	521.06	1136.28
COS	Standard Cosine	COS	-1			55	0.409484	0.388272	0.398735	0.761514	0.702026	0.986312	0.993078	0.28943	0.28943	0.537951	0.424128	0.71057	0.694136	0.762437	0.417792	0.614918	0.726098	0.683386	0.800622	0.58765	0.41235	0.199378	0.273902	0.316614	3.12	0.999338	1998.44	2177.66	821.44	542.32	1170.46
COS	Standard Cosine	COS	65535		ü	33	0.405356	0.378894	0.3919	0.761492	0.709458	1.01196	1.00591	0.292214	0.292214	0.540536	0.423776	0.707786	0.689447	0.762779	0.421552	0.614883	0.719929	0.685427	0.808209	0.570686	0.429314	0.191791	0.280071	0.314573	3.12	0.999338	1996.78	2198.28	855.18	521.7	1136.72
COS	Standard Cosine	COS	-1			56	0.409009	0.387932	0.398329	0.761292	0.702217	0.986359	0.993102	0.289638	0.289638	0.538146	0.423924	0.710362	0.693966	0.762207	0.417839	0.614626	0.726025	0.682984	0.800221	0.587711	0.412289	0.199779	0.273975	0.317016	3.12	0.999338	1997.48	2176.56	821.32	543.42	1170.58
COS	Standard Cosine	COS	65535		ü	13	0.400347	0.367057	0.383339	0.761285	0.721576	1.04274	1.02109	0.295814	0.295814	0.543864	0.419536	0.704186	0.683529	0.763086	0.426	0.614606	0.71254	0.687807	0.817242	0.549815	0.450185	0.182758	0.28746	0.312193	3.12	0.999338	1976.8	2222.86	896.72	497.12	1095.18
COS	Standard Cosine	COS	65535		ü	34	0.404881	0.378788	0.391615	0.761224	0.709891	1.01233	1.00609	0.292376	0.292376	0.540685	0.423322	0.707624	0.689394	0.762488	0.421484	0.614535	0.720041	0.68484	0.807467	0.571322	0.428678	0.192533	0.279959	0.31516	3.12	0.999338	1994.64	2196.26	853.92	523.72	1137.98
COS	Standard Cosine	COS	-1			57	0.408611	0.387664	0.397998	0.761114	0.702454	0.986859	0.993353	0.289803	0.289803	0.538299	0.423759	0.710197	0.693832	0.762022	0.417866	0.614394	0.725979	0.682632	0.799884	0.58778	0.41222	0.200116	0.274021	0.317368	3.12	0.999338	1996.7	2175.64	821.18	544.34	1170.72
COS	Standard Cosine	COS	65535		ü	35	0.404406	0.378615	0.391296	0.760979	0.710111	1.01174	1.0058	0.292546	0.292546	0.540841	0.422838	0.707454	0.689308	0.762223	0.42145	0.614216	0.720094	0.684312	0.806846	0.571769	0.428231	0.193154	0.279906	0.315688	3.12	0.999338	1992.36	2194.58	853.04	525.4	1138.86
COS	Standard Cosine	COS	65535		ü	36	0.404596	0.379068	0.391622	0.760972	0.709874	1.01122	1.00554	0.292414	0.292414	0.540719	0.422982	0.707586	0.689534	0.762198	0.42127	0.614208	0.720393	0.684203	0.806458	0.57261	0.42739	0.193542	0.279607	0.315797	3.12	0.999338	1993.04	2193.52	851.36	526.46	1140.54
COS	Standard Cosine	COS	65535		ü	12	0.398939	0.365199	0.381694	0.76089	0.723821	1.04747	1.0234	0.296561	0.296561	0.544547	0.418199	0.703439	0.682599	0.762734	0.426535	0.614095	0.711636	0.687303	0.817528	0.547671	0.452329	0.182472	0.288364	0.312697	3.12	0.999338	1970.5	2223.64	901.02	496.34	1090.88
COS	Standard Cosine	COS	-1			58	0.408188	0.3875	0.397708	0.760875	0.702662	0.986847	0.993346	0.289965	0.289965	0.53845	0.4235	0.710035	0.69375	0.761768	0.41783	0.614084	0.726038	0.68215	0.799286	0.588214	0.411786	0.200714	0.273962	0.31785	3.12	0.999338	1995.48	2174.02	820.32	545.96	1171.58
COS	Standard Cosine	COS	-1			59	0.407997	0.387498	0.397614	0.760741	0.702985	0.986983	0.993414	0.290028	0.290028	0.538506	0.423156	0.709972	0.693749	0.761621	0.417774	0.613912	0.726127	0.68187	0.79888	0.588618	0.411382	0.20112	0.273873	0.31813	3.12	0.999338	1993.86	2172.92	819.52	547.06	1172.38
COS	Standard Cosine	COS	-1			60	0.408216	0.387968	0.397962	0.760737	0.702777	0.987055	0.993452	0.289888	0.289888	0.53838	0.423466	0.710112	0.693984	0.761601	0.41758	0.613904	0.726449	0.681767	0.798482	0.589486	0.410514	0.201518	0.273551	0.318233	3.12	0.999338	1995.32	2171.84	817.78	548.14	1174.12
COS	Standard Cosine	COS	65535		ü	37	0.40394	0.37877	0.391151	0.76065	0.709852	1.01076	1.00531	0.29266	0.29266	0.540949	0.422834	0.70734	0.689385	0.761855	0.421252	0.613786	0.720421	0.683519	0.805702	0.573068	0.426932	0.194298	0.279579	0.316481	3.12	0.999338	1992.34	2191.46	850.46	528.52	1141.44
COS	Standard Cosine	COS	-1			61	0.407887	0.387792	0.397711	0.760575	0.70321	0.987666	0.993758	0.29002	0.29002	0.538503	0.423147	0.70998	0.693896	0.76143	0.417578	0.613691	0.726451	0.681436	0.798123	0.589668	0.410332	0.201877	0.273549	0.318564	3.12	0.999338	1993.82	2170.86	817.42	549.12	1174.48
COS	Standard Cosine	COS	65535		ü	38	0.403794	0.378832	0.391112	0.760541	0.709793	1.01033	1.0051	0.292694	0.292694	0.540978	0.422715	0.707306	0.689416	0.761731	0.421181	0.613645	0.720536	0.683258	0.805312	0.573521	0.426479	0.194688	0.279464	0.316742	3.12	0.999338	1991.78	2190.4	849.56	529.58	1142.34
COS	Standard Cosine	COS	65535		ü	39	0.403973	0.379316	0.391448	0.760518	0.709475	1.00957	1.00472	0.292558	0.292558	0.540855	0.422914	0.707442	0.689658	0.761687	0.42098	0.613614	0.72087	0.683104	0.804844	0.574471	0.425529	0.195156	0.27913	0.316896	3.12	0.999338	1992.72	2189.14	847.66	530.84	1144.24
COS	Standard Cosine	COS	65535		ü	11	0.397279	0.362703	0.379595	0.760493	0.725922	1.05369	1.02644	0.297495	0.297495	0.545406	0.417553	0.702505	0.681351	0.76241	0.4273	0.613576	0.71035	0.686929	0.818312	0.544391	0.455609	0.181688	0.28965	0.313071	3.12	0.999338	1967.46	2225.78	907.56	494.2	1084.34
COS	Standard Cosine	COS	65535		ü	41	0.404166	0.379899	0.391843	0.760475	0.70894	1.00809	1.00399	0.292406	0.292406	0.540716	0.423037	0.707594	0.68995	0.761615	0.420734	0.613556	0.72128	0.682886	0.804236	0.575663	0.424337	0.195764	0.27872	0.317114	3.12	0.999338	1993.3	2187.48	845.28	532.5	1146.62
COS	Standard Cosine	COS	65535		ü	40	0.403943	0.379517	0.391537	0.760444	0.709398	1.00948	1.00468	0.292533	0.292533	0.540831	0.422935	0.707467	0.689758	0.761596	0.42087	0.613519	0.721053	0.68289	0.804447	0.575069	0.424931	0.195553	0.278947	0.31711	3.12	0.999338	1992.82	2188.06	846.46	531.92	1145.44
COS	Standard Cosine	COS	-1			62	0.407107	0.387089	0.39697	0.760265	0.703545	0.988358	0.994108	0.290377	0.290377	0.538833	0.422994	0.709623	0.693545	0.761118	0.41773	0.613287	0.726202	0.680905	0.797742	0.589347	0.410653	0.202258	0.273798	0.319095	3.12	0.999338	1993.1	2169.82	818.06	550.16	1173.84
COS	Standard Cosine	COS	65535		ü	44	0.403975	0.38031	0.391962	0.760238	0.708923	1.00718	1.00353	0.292393	0.292393	0.540704	0.422732	0.707607	0.690155	0.761337	0.420471	0.613249	0.721716	0.682259	0.80316	0.57715	0.42285	0.19684	0.278284	0.317741	3.12	0.999338	1991.86	2184.56	842.3	535.42	1149.6
COS	Standard Cosine	COS	65535		ü	42	0.403739	0.379792	0.391581	0.760236	0.709271	1.00819	1.00404	0.29255	0.29255	0.540849	0.422617	0.70745	0.689896	0.761356	0.420675	0.613246	0.721377	0.682363	0.803579	0.576213	0.423787	0.196421	0.278623	0.317637	3.12	0.999338	1991.32	2185.7	844.18	534.28	1147.72
COS	Standard Cosine	COS	-1			6	0.401788	0.375191	0.388259	0.760216	0.721279	1.03641	1.01797	0.293925	0.293925	0.542113	0.417502	0.706075	0.687595	0.761527	0.422487	0.613229	0.718375	0.683412	0.807305	0.567886	0.432114	0.192695	0.281625	0.316588	3.12	0.999338	1967.22	2195.84	860.8	524.14	1131.1
COS	Standard Cosine	COS	65535		ü	43	0.403767	0.379971	0.391687	0.760201	0.709165	1.00753	1.00371	0.292512	0.292512	0.540815	0.422549	0.707488	0.689986	0.76131	0.42059	0.613199	0.72152	0.682248	0.803321	0.57665	0.42335	0.196679	0.27848	0.317752	3.12	0.999338	1991	2185	843.3	534.98	1148.6
COS	Standard Cosine	COS	65535		ü	46	0.404107	0.380831	0.392295	0.760171	0.708838	1.00713	1.00351	0.29227	0.29227	0.540589	0.422833	0.70773	0.690416	0.761244	0.420233	0.613163	0.722108	0.681999	0.802528	0.578303	0.421697	0.197472	0.277892	0.318001	3.12	0.999338	1992.34	2182.84	840	537.14	1151.9
COS	Standard Cosine	COS	-1			63	0.40696	0.387099	0.396904	0.760162	0.703855	0.988795	0.994326	0.290423	0.290423	0.538876	0.42277	0.709577	0.693549	0.761006	0.417681	0.613154	0.726283	0.680678	0.797419	0.589679	0.410321	0.202581	0.273717	0.319322	3.12	0.999338	1992.04	2168.94	817.4	551.04	1174.5
COS	Standard Cosine	COS	65535		ü	45	0.403592	0.380134	0.391685	0.76004	0.709258	1.00787	1.00388	0.292541	0.292541	0.54084	0.422524	0.707459	0.690067	0.761127	0.420456	0.612992	0.721736	0.681855	0.802695	0.577439	0.422561	0.197305	0.278264	0.318145	3.12	0.999338	1990.88	2183.3	841.74	536.68	1150.16
COS	Standard Cosine	COS	-1			66	0.407008	0.387647	0.397208	0.76001	0.70377	0.988727	0.994294	0.29033	0.29033	0.538789	0.422863	0.70967	0.693823	0.760821	0.417391	0.612957	0.726759	0.680249	0.796507	0.59114	0.40886	0.203493	0.273241	0.319751	3.12	0.999338	1992.48	2166.46	814.48	553.52	1177.42
COS	Standard Cosine	COS	-1			64	0.406763	0.38716	0.396839	0.760006	0.703936	0.989054	0.994457	0.290478	0.290478	0.538927	0.422757	0.709522	0.69358	0.760834	0.417587	0.612951	0.726435	0.680327	0.796889	0.590271	0.409729	0.203111	0.273565	0.319673	3.12	0.999338	1991.98	2167.5	816.22	552.48	1175.68
COS	Standard Cosine	COS	65535		ü	47	0.403742	0.380685	0.392042	0.759977	0.708821	1.00653	1.00321	0.292406	0.292406	0.540716	0.422638	0.707594	0.690343	0.761036	0.42021	0.612909	0.722146	0.681597	0.802048	0.578637	0.421363	0.197952	0.277854	0.318403	3.12	0.999338	1991.42	2181.54	839.34	538.44	1152.56
COS	Standard Cosine	COS	-1			65	0.40671	0.38717	0.396818	0.759965	0.703902	0.988731	0.994298	0.290495	0.290495	0.538945	0.422659	0.709505	0.693585	0.760789	0.417566	0.612896	0.726471	0.68024	0.796757	0.590413	0.409587	0.203243	0.273529	0.31976	3.12	0.999338	1991.52	2167.14	815.94	552.84	1175.96
COS	Standard Cosine	COS	65535		ü	48	0.403811	0.380912	0.392192	0.759957	0.708711	1.00642	1.00315	0.29235	0.29235	0.540663	0.422757	0.70765	0.690456	0.761006	0.420109	0.612885	0.722307	0.681504	0.801806	0.579106	0.420894	0.198194	0.277693	0.318496	3.12	0.999338	1991.98	2180.88	838.42	539.1	1153.48
COS	Standard Cosine	COS	-1			67	0.406814	0.387553	0.397065	0.759907	0.703864	0.988914	0.994387	0.290406	0.290406	0.538861	0.422774	0.709594	0.693777	0.760712	0.417384	0.612822	0.726772	0.680042	0.796265	0.591289	0.408711	0.203735	0.273228	0.319958	3.12	0.999338	1992.06	2165.8	814.18	554.18	1177.72
COS	Standard Cosine	COS	65535		ü	49	0.403474	0.38077	0.391956	0.759776	0.709025	1.00635	1.00311	0.292478	0.292478	0.540782	0.422299	0.707522	0.690385	0.760813	0.420093	0.612649	0.722337	0.681137	0.801364	0.579406	0.420594	0.198636	0.277663	0.318863	3.12	0.999338	1989.82	2179.68	837.82	540.3	1154.08
COS	Standard Cosine	COS	-1			68	0.406507	0.387343	0.396808	0.75976	0.703991	0.989075	0.99447	0.290538	0.290538	0.538984	0.422659	0.709462	0.693672	0.760559	0.417407	0.61263	0.726736	0.679771	0.795984	0.591359	0.408641	0.204016	0.273264	0.320229	3.12	0.999338	1991.52	2165.04	814.04	554.94	1177.86
COS	Standard Cosine	COS	65535		ü	10	0.394358	0.359096	0.376311	0.759637	0.729131	1.06094	1.02996	0.29898	0.29898	0.546759	0.41597	0.70102	0.679548	0.761622	0.428289	0.612467	0.708684	0.685674	0.818541	0.540555	0.459445	0.181459	0.291316	0.314326	3.12	0.999338	1960	2226.4	915.18	493.58	1076.72
COS	Standard Cosine	COS	65535		ü	53	0.403412	0.381277	0.392187	0.759587	0.708783	1.00588	1.00288	0.292418	0.292418	0.540725	0.422477	0.707582	0.690639	0.760586	0.419807	0.612405	0.722802	0.680609	0.80037	0.580907	0.419093	0.19963	0.277198	0.319391	3.12	0.999338	1990.66	2176.98	834.84	543	1157.06
COS	Standard Cosine	COS	65535		ü	50	0.403074	0.380542	0.391644	0.759578	0.709144	1.00632	1.00311	0.292639	0.292639	0.540931	0.422133	0.707361	0.690271	0.760604	0.4201	0.612391	0.722325	0.680749	0.800938	0.579604	0.420396	0.199062	0.277675	0.319251	3.12	0.999338	1989.04	2178.52	837.42	541.46	1154.48
COS	Standard Cosine	COS	-1			71	0.406201	0.387411	0.396693	0.759517	0.704326	0.989385	0.994627	0.290635	0.290635	0.539077	0.422311	0.709365	0.693706	0.760295	0.417271	0.612313	0.726956	0.679245	0.795193	0.592218	0.407782	0.204807	0.273044	0.320755	3.12	0.999338	1989.88	2162.88	812.34	557.1	1179.56
COS	Standard Cosine	COS	-1			69	0.406035	0.387078	0.396442	0.759516	0.704288	0.989567	0.994717	0.290733	0.290733	0.539165	0.422422	0.709267	0.693539	0.760304	0.417407	0.612314	0.726732	0.679302	0.795455	0.591623	0.408377	0.204545	0.273268	0.320698	3.12	0.999338	1990.4	2163.6	813.52	556.38	1178.38
COS	Standard Cosine	COS	65535		ü	51	0.402962	0.380621	0.39163	0.759478	0.70897	1.00628	1.00308	0.292664	0.292664	0.540953	0.422345	0.707336	0.69031	0.760493	0.420027	0.612263	0.722445	0.680517	0.800572	0.580048	0.419952	0.199428	0.277555	0.319483	3.12	0.999338	1990.04	2177.52	836.54	542.46	1155.36
COS	Standard Cosine	COS	-1			70	0.405972	0.387059	0.396401	0.759475	0.704343	0.989622	0.994746	0.290759	0.290759	0.539189	0.422375	0.709241	0.69353	0.760261	0.417398	0.61226	0.726749	0.679223	0.795347	0.591713	0.408287	0.204653	0.273251	0.320777	3.12	0.999338	1990.18	2163.3	813.34	556.68	1178.56
COS	Standard Cosine	COS	65535		ü	52	0.403007	0.380745	0.391716	0.759472	0.708923	1.00628	1.00308	0.292631	0.292631	0.540921	0.422409	0.707369	0.690373	0.760481	0.419973	0.612256	0.722531	0.680476	0.800453	0.580293	0.419707	0.199547	0.277469	0.319524	3.12	0.999338	1990.34	2177.2	836.06	542.78	1155.84
COS	Standard Cosine	COS	65535		ü	54	0.403082	0.381126	0.391949	0.759407	0.708859	1.00578	1.00283	0.29255	0.29255	0.540847	0.422375	0.70745	0.690563	0.760395	0.419794	0.612172	0.722825	0.680257	0.799946	0.58118	0.41882	0.200054	0.277175	0.319743	3.12	0.999338	1990.18	2175.82	834.3	544.16	1157.6
COS	Standard Cosine	COS	65535		ü	55	0.402823	0.380993	0.391755	0.75927	0.709016	1.00627	1.00307	0.292652	0.292652	0.540939	0.422307	0.707348	0.690497	0.760251	0.419789	0.611997	0.722832	0.679991	0.799634	0.58136	0.41864	0.200366	0.277168	0.320009	3.12	0.999338	1989.86	2174.98	833.94	545	1157.96
COS	Standard Cosine	COS	-1			72	0.405662	0.387077	0.396259	0.759248	0.704615	0.989767	0.994817	0.29086	0.29086	0.539282	0.422048	0.70914	0.693538	0.760015	0.417289	0.611966	0.726925	0.678738	0.79464	0.592437	0.407563	0.20536	0.273075	0.321262	3.12	0.999338	1988.64	2161.38	811.9	558.6	1180
COS	Standard Cosine	COS	-1			74	0.405601	0.387202	0.396293	0.75916	0.704598	0.990089	0.994983	0.290869	0.290869	0.539292	0.422184	0.709131	0.693601	0.759916	0.4172	0.611849	0.72707	0.67853	0.794277	0.592925	0.407075	0.205723	0.27293	0.32147	3.12	0.999338	1989.28	2160.38	810.94	559.6	1180.96
COS	Standard Cosine	COS	-1			73	0.405446	0.386891	0.396058	0.759157	0.704768	0.990115	0.994995	0.290962	0.290962	0.539379	0.421972	0.709038	0.693446	0.759923	0.417327	0.611845	0.726863	0.678583	0.794518	0.592373	0.407627	0.205482	0.273137	0.321417	3.12	0.999338	1988.28	2161.04	812.04	558.94	1179.86
COS	Standard Cosine	COS	65535		ü	9	0.392402	0.356382	0.373956	0.759128	0.731984	1.06814	1.03345	0.300033	0.300033	0.547726	0.414883	0.699967	0.678191	0.761183	0.429084	0.611802	0.707346	0.685056	0.81914	0.537241	0.462759	0.18086	0.292654	0.314944	3.12	0.999338	1954.88	2228.04	921.78	491.94	1070.12
COS	Standard Cosine	COS	65535		ü	56	0.40248	0.380799	0.391487	0.759102	0.709131	1.00626	1.00307	0.292792	0.292792	0.541069	0.422154	0.707208	0.690399	0.760075	0.419795	0.611777	0.722822	0.679658	0.799275	0.581524	0.418476	0.200725	0.277178	0.320342	3.12	0.999338	1989.14	2174	833.62	545.98	1158.28
COS	Standard Cosine	COS	-1			75	0.405241	0.386821	0.395922	0.759033	0.704929	0.990463	0.99517	0.291043	0.291043	0.539453	0.421904	0.708957	0.69341	0.759792	0.417302	0.611686	0.726902	0.678339	0.794203	0.592618	0.407382	0.205797	0.273098	0.321661	3.12	0.999338	1987.96	2160.18	811.56	559.8	1180.34
COS	Standard Cosine	COS	65535		ü	57	0.402147	0.380641	0.391245	0.758924	0.70914	1.00594	1.00291	0.292923	0.292923	0.541191	0.422018	0.707077	0.690321	0.759886	0.419783	0.611545	0.722841	0.679306	0.798857	0.581785	0.418215	0.201143	0.277159	0.320694	3.12	0.999338	1988.5	2172.86	833.1	547.12	1158.8
COS	Standard Cosine	COS	65535		ü	59	0.402164	0.380893	0.391382	0.758861	0.709178	1.00568	1.00278	0.292877	0.292877	0.541149	0.421823	0.707123	0.690447	0.759807	0.419654	0.611463	0.723056	0.679108	0.798452	0.582442	0.417558	0.201548	0.276944	0.320892	3.12	0.999338	1987.58	2171.76	831.78	548.22	1160.12
COS	Standard Cosine	COS	65535		ü	58	0.401905	0.380545	0.391078	0.758796	0.709241	1.00601	1.00294	0.293013	0.293013	0.541273	0.421895	0.706987	0.690273	0.75975	0.419765	0.611379	0.722872	0.679033	0.798536	0.58201	0.41799	0.201464	0.277128	0.320967	3.12	0.999338	1987.92	2171.98	832.64	548	1159.26
COS	Standard Cosine	COS	-1			76	0.404715	0.386519	0.395511	0.75876	0.705201	0.990701	0.995291	0.291259	0.291259	0.539652	0.42167	0.708741	0.693259	0.759506	0.417307	0.611332	0.726897	0.677818	0.793608	0.592911	0.407089	0.206392	0.273103	0.322182	3.12	0.999338	1986.86	2158.56	810.96	561.42	1180.94
COS	Standard Cosine	COS	-1			77	0.404511	0.386387	0.395344	0.758662	0.705336	0.990836	0.995357	0.291344	0.291344	0.53973	0.421522	0.708656	0.693194	0.759403	0.417318	0.611205	0.726877	0.677634	0.793414	0.592973	0.407027	0.206586	0.273123	0.322366	3.12	0.999338	1986.16	2158.04	810.84	561.94	1181.06
COS	Standard Cosine	COS	65535		ü	60	0.401387	0.380292	0.390695	0.758522	0.709432	1.00593	1.0029	0.293216	0.293216	0.541461	0.42159	0.706784	0.690146	0.759459	0.419751	0.611025	0.722895	0.678492	0.7979	0.582392	0.417608	0.2021	0.277105	0.321508	3.12	0.999338	1986.48	2170.26	831.88	549.72	1160.02
COS	Standard Cosine	COS	65535		ü	61	0.401065	0.380144	0.390463	0.758351	0.709522	1.00604	1.00296	0.293344	0.293344	0.541579	0.421505	0.706656	0.690072	0.759278	0.419739	0.610801	0.722914	0.67815	0.797498	0.582646	0.417354	0.202502	0.277086	0.32185	3.12	0.999338	1986.08	2169.16	831.38	550.82	1160.52
COS	Standard Cosine	COS	-1			78	0.403673	0.38566	0.394562	0.758313	0.705578	0.991469	0.995675	0.291726	0.291726	0.540083	0.421441	0.708274	0.69283	0.75905	0.417464	0.610752	0.726637	0.677036	0.792938	0.592722	0.407278	0.207062	0.273363	0.322964	3.12	0.999338	1985.78	2156.74	811.34	563.24	1180.56
COS	Standard Cosine	COS	65535		ü	62	0.400832	0.380039	0.390295	0.758222	0.709653	1.00605	1.00297	0.293437	0.293437	0.541665	0.421326	0.706563	0.69002	0.759142	0.419726	0.610634	0.722935	0.677897	0.797191	0.582848	0.417152	0.202809	0.277065	0.322103	3.12	0.999338	1985.24	2168.32	830.98	551.66	1160.92
COS	Standard Cosine	COS	-1			80	0.403551	0.385676	0.39451	0.758216	0.705833	0.991919	0.995902	0.291764	0.291764	0.540121	0.421275	0.708236	0.692838	0.758944	0.417418	0.610625	0.726718	0.676833	0.792627	0.593048	0.406952	0.207373	0.273282	0.323167	3.12	0.999338	1985	2155.9	810.68	564.08	1181.22
COS	Standard Cosine	COS	65535		ü	8	0.389643	0.353599	0.371181	0.758215	0.73717	1.07949	1.03893	0.301306	0.301306	0.548888	0.41215	0.698694	0.6768	0.760289	0.429742	0.610614	0.706235	0.683408	0.818505	0.535094	0.464906	0.181495	0.293765	0.316592	3.12	0.999338	1942	2226.3	926.04	493.68	1065.86
COS	Standard Cosine	COS	-1			79	0.403382	0.385396	0.394285	0.758195	0.705854	0.992042	0.995962	0.291858	0.291858	0.540206	0.421258	0.708142	0.692698	0.75893	0.417523	0.610599	0.726543	0.676838	0.792788	0.592608	0.407392	0.207212	0.273457	0.323162	3.12	0.999338	1984.92	2156.34	811.56	563.64	1180.34
COS	Standard Cosine	COS	65535		ü	63	0.400693	0.380044	0.39023	0.758125	0.709713	1.00614	1.00301	0.293479	0.293479	0.541704	0.421271	0.706521	0.690022	0.759035	0.419682	0.610509	0.723006	0.677686	0.796887	0.583158	0.416842	0.203113	0.276994	0.322314	3.12	0.999338	1984.98	2167.5	830.36	552.48	1161.54
COS	Standard Cosine	COS	-1			81	0.403218	0.385496	0.394256	0.758038	0.705846	0.991796	0.995837	0.2919	0.2919	0.540243	0.421225	0.7081	0.692748	0.758757	0.417412	0.610398	0.726725	0.676493	0.792228	0.593268	0.406732	0.207772	0.273275	0.323507	3.12	0.999338	1984.76	2154.82	810.24	565.16	1181.66
COS	Standard Cosine	COS	-1			82	0.403087	0.385483	0.394186	0.757945	0.706058	0.992135	0.996007	0.291947	0.291947	0.540288	0.421038	0.708053	0.692742	0.758657	0.417376	0.610277	0.726784	0.676303	0.791956	0.593527	0.406473	0.208044	0.273216	0.323697	3.12	0.999338	1983.88	2154.08	809.72	565.9	1182.18
COS	Standard Cosine	COS	-1			83	0.403025	0.385542	0.394185	0.757876	0.70588	0.991889	0.995884	0.291964	0.291964	0.540303	0.421182	0.708036	0.692771	0.758581	0.417323	0.610186	0.726872	0.676153	0.791701	0.593841	0.406159	0.208299	0.273128	0.323847	3.12	0.999338	1984.56	2153.38	809.1	566.6	1182.8
COS	Standard Cosine	COS	65535		ü	67	0.400286	0.380201	0.390112	0.757788	0.709814	1.00589	1.00289	0.293594	0.293594	0.541808	0.421042	0.706406	0.6901	0.758663	0.419476	0.610074	0.723344	0.676941	0.795735	0.584466	0.415534	0.204265	0.276656	0.323059	3.12	0.999338	1983.9	2164.36	827.76	555.62	1164.14
COS	Standard Cosine	COS	65535		ü	64	0.399956	0.379535	0.38961	0.757783	0.709895	1.00638	1.00313	0.293793	0.293793	0.541993	0.421127	0.706207	0.689767	0.75868	0.419744	0.610066	0.722904	0.677052	0.796253	0.583282	0.416718	0.203747	0.277096	0.322948	3.12	0.999338	1984.3	2165.78	830.12	554.2	1161.78
COS	Standard Cosine	COS	65535		ü	66	0.400107	0.379922	0.389882	0.757757	0.709861	1.00618	1.00303	0.293692	0.293692	0.541897	0.421068	0.706308	0.689961	0.758639	0.419575	0.610034	0.723179	0.676928	0.795864	0.584057	0.415943	0.204136	0.276821	0.323072	3.12	0.999338	1984.02	2164.72	828.58	555.26	1163.32
COS	Standard Cosine	COS	65535		ü	65	0.399934	0.379628	0.389647	0.757734	0.709925	1.00628	1.00308	0.293789	0.293789	0.541988	0.421012	0.706211	0.689814	0.758624	0.419686	0.610004	0.722998	0.676936	0.796032	0.583596	0.416404	0.203968	0.277002	0.323064	3.12	0.999338	1983.76	2165.18	829.5	554.8	1162.4
COS	Standard Cosine	COS	-1			84	0.402566	0.385167	0.393769	0.757673	0.706088	0.992224	0.996053	0.292172	0.292172	0.540494	0.421055	0.707828	0.692584	0.758374	0.417388	0.609925	0.726761	0.675805	0.791391	0.593776	0.406224	0.208609	0.273239	0.324195	3.12	0.999338	1983.96	2152.54	809.24	567.44	1182.66
COS	Standard Cosine	COS	65535		ü	68	0.399885	0.379971	0.389799	0.757581	0.709929	1.00611	1.00299	0.29376	0.29376	0.541959	0.420991	0.70624	0.689986	0.758446	0.419481	0.609808	0.723334	0.676551	0.795291	0.58468	0.41532	0.204709	0.276666	0.323449	3.12	0.999338	1983.66	2163.16	827.34	556.82	1164.56
COS	Standard Cosine	COS	-1			5	0.395059	0.369567	0.382098	0.757543	0.727086	1.05131	1.02527	0.296879	0.296879	0.544828	0.415282	0.703121	0.684783	0.758803	0.423585	0.60976	0.716551	0.678508	0.80358	0.565987	0.434013	0.19642	0.283449	0.321492	3.12	0.999338	1956.76	2185.7	864.58	534.28	1127.32
COS	Standard Cosine	COS	-1			85	0.402241	0.384985	0.393517	0.757503	0.706423	0.992568	0.996224	0.292304	0.292304	0.540617	0.420741	0.707696	0.692493	0.758196	0.417389	0.609705	0.726763	0.675479	0.791016	0.59397	0.40603	0.208984	0.273237	0.324521	3.12	0.999338	1982.48	2151.52	808.84	568.46	1183.06
COS	Standard Cosine	COS	-1			86	0.402197	0.385041	0.393524	0.757451	0.706525	0.992628	0.996253	0.292312	0.292312	0.540624	0.420617	0.707688	0.69252	0.758137	0.417342	0.609636	0.72684	0.675358	0.79081	0.594231	0.405769	0.20919	0.27316	0.324642	3.12	0.999338	1981.9	2150.96	808.32	569.02	1183.58
COS	Standard Cosine	COS	-1			88	0.402125	0.385037	0.393487	0.7574	0.706589	0.99287	0.996375	0.292337	0.292337	0.540648	0.420596	0.707663	0.692518	0.758082	0.417321	0.609569	0.726875	0.67525	0.790657	0.59438	0.40562	0.209343	0.273125	0.32475	3.12	0.999338	1981.8	2150.54	808.02	569.44	1183.88
COS	Standard Cosine	COS	65535		ü	70	0.399607	0.379931	0.389643	0.757395	0.710078	1.00599	1.00293	0.293861	0.293861	0.542055	0.420779	0.706139	0.689965	0.758246	0.419419	0.609565	0.723434	0.676173	0.794762	0.585169	0.414831	0.205238	0.276566	0.323827	3.12	0.999338	1982.66	2161.72	826.38	558.26	1165.52
COS	Standard Cosine	COS	-1			87	0.40204	0.384905	0.393378	0.757384	0.706521	0.992513	0.996197	0.292384	0.292384	0.54069	0.420588	0.707616	0.692452	0.75807	0.417369	0.609551	0.726793	0.675247	0.79072	0.594184	0.405816	0.20928	0.273207	0.324753	3.12	0.999338	1981.76	2150.72	808.42	569.26	1183.48
COS	Standard Cosine	COS	65535		ü	69	0.399432	0.379661	0.389419	0.757365	0.710298	1.00629	1.00308	0.293955	0.293955	0.542141	0.420571	0.706045	0.68983	0.758222	0.419516	0.609527	0.723276	0.676156	0.794886	0.584775	0.415225	0.205114	0.276724	0.323844	3.12	0.999338	1981.68	2162.06	827.16	557.92	1164.74
COS	Standard Cosine	COS	65535		ü	71	0.399529	0.38002	0.389651	0.757313	0.710035	1.00593	1.0029	0.293874	0.293874	0.542067	0.420825	0.706126	0.69001	0.758154	0.419347	0.609459	0.723552	0.675976	0.794439	0.585581	0.414419	0.205561	0.276448	0.324024	3.12	0.999338	1982.88	2160.84	825.56	559.14	1166.34
COS	Standard Cosine	COS	-1			89	0.401831	0.384855	0.39325	0.757245	0.706737	0.992967	0.996423	0.292465	0.292465	0.540765	0.420452	0.707535	0.692428	0.757922	0.417329	0.609371	0.726859	0.674972	0.79034	0.594515	0.405485	0.20966	0.273141	0.325028	3.12	0.999338	1981.12	2149.68	807.76	570.3	1184.14
COS	Standard Cosine	COS	-1			90	0.401729	0.384885	0.393216	0.75716	0.70686	0.993209	0.996544	0.292495	0.292495	0.540792	0.420405	0.707505	0.692443	0.757828	0.417278	0.60926	0.726943	0.674786	0.790052	0.594834	0.405166	0.209948	0.273057	0.325214	3.12	0.999338	1980.9	2148.9	807.12	571.08	1184.78
COS	Standard Cosine	COS	65535		ü	72	0.399176	0.379816	0.389375	0.757134	0.710201	1.00613	1.00301	0.294018	0.294018	0.5422	0.420694	0.705982	0.689908	0.757966	0.419354	0.609227	0.723542	0.675634	0.794056	0.58576	0.41424	0.205944	0.276458	0.324366	3.12	0.999338	1982.26	2159.8	825.2	560.18	1166.7
COS	Standard Cosine	COS	65535		ü	7	0.386029	0.349468	0.367292	0.757095	0.743177	1.09483	1.04627	0.303081	0.303081	0.5505	0.410023	0.696919	0.674734	0.759234	0.430807	0.609165	0.704428	0.681601	0.818328	0.531141	0.468859	0.181672	0.295572	0.318399	3.12	0.999338	1931.98	2225.82	933.92	494.16	1057.98
COS	Standard Cosine	COS	-1			91	0.401582	0.384828	0.393115	0.757071	0.70689	0.993188	0.996537	0.292554	0.292554	0.540848	0.420393	0.707446	0.692414	0.757735	0.417261	0.609145	0.726969	0.674613	0.789831	0.594997	0.405003	0.210169	0.273031	0.325387	3.12	0.999338	1980.84	2148.3	806.8	571.68	1185.1
COS	Standard Cosine	COS	65535		ü	73	0.399067	0.379855	0.389341	0.757044	0.710256	1.00603	1.00295	0.294048	0.294048	0.542229	0.420554	0.705952	0.689928	0.757867	0.419299	0.609109	0.723633	0.675434	0.793747	0.586108	0.413892	0.206253	0.276367	0.324566	3.12	0.999338	1981.6	2158.96	824.5	561.02	1167.4
COS	Standard Cosine	COS	-1			93	0.40146	0.384799	0.39304	0.756988	0.707072	0.993481	0.996684	0.292601	0.292601	0.54089	0.420253	0.707399	0.6924	0.757646	0.417238	0.609038	0.727007	0.674453	0.789602	0.595197	0.404803	0.210398	0.272993	0.325547	3.12	0.999338	1980.18	2147.68	806.4	572.3	1185.5
COS	Standard Cosine	COS	-1			92	0.401421	0.384724	0.392982	0.756984	0.707094	0.993545	0.996715	0.292626	0.292626	0.540913	0.420244	0.707374	0.692362	0.757645	0.417268	0.609034	0.726958	0.674463	0.789655	0.595069	0.404931	0.210345	0.273042	0.325537	3.12	0.999338	1980.14	2147.82	806.66	572.16	1185.24
COS	Standard Cosine	COS	65535		ü	75	0.398862	0.379773	0.389199	0.756923	0.710366	1.00631	1.00309	0.294129	0.294129	0.542301	0.420507	0.705871	0.689886	0.757738	0.41928	0.608954	0.723663	0.675199	0.793444	0.586329	0.413671	0.206556	0.276337	0.324801	3.12	0.999338	1981.38	2158.14	824.06	561.84	1167.84
COS	Standard Cosine	COS	-1			94	0.401252	0.384666	0.39287	0.756882	0.707217	0.993591	0.996741	0.29269	0.29269	0.540974	0.420121	0.70731	0.692333	0.757536	0.417248	0.608901	0.726992	0.67426	0.78939	0.595276	0.404724	0.21061	0.273008	0.32574	3.12	0.999338	1979.56	2147.1	806.24	572.88	1185.66
COS	Standard Cosine	COS	65535		ü	76	0.398817	0.379865	0.389224	0.756856	0.710481	1.00646	1.00317	0.294133	0.294133	0.542306	0.420452	0.705867	0.689932	0.757663	0.419215	0.608868	0.723769	0.675048	0.793171	0.586694	0.413306	0.206829	0.276231	0.324952	3.12	0.999338	1981.12	2157.4	823.34	562.58	1168.56
COS	Standard Cosine	COS	65535		ü	74	0.398677	0.379585	0.389012	0.756853	0.710392	1.0063	1.00309	0.294218	0.294218	0.542383	0.420477	0.705782	0.689793	0.757669	0.419328	0.608864	0.723585	0.675092	0.793386	0.586199	0.413801	0.206614	0.276415	0.324908	3.12	0.999338	1981.24	2157.98	824.32	562	1167.58
COS	Standard Cosine	COS	-1			95	0.40125	0.384747	0.392911	0.756848	0.707208	0.993481	0.996686	0.292681	0.292681	0.540966	0.420087	0.707319	0.692374	0.757497	0.417199	0.608856	0.727073	0.674177	0.78922	0.595527	0.404473	0.21078	0.272927	0.325823	3.12	0.999338	1979.4	2146.64	805.74	573.34	1186.16
COS	Standard Cosine	COS	65535		ü	77	0.398676	0.379844	0.389145	0.75676	0.710528	1.00654	1.00321	0.294184	0.294184	0.542352	0.420405	0.705816	0.689922	0.757559	0.419184	0.608745	0.72382	0.674856	0.792899	0.586945	0.413055	0.207101	0.27618	0.325144	3.12	0.999338	1980.9	2156.66	822.84	563.32	1169.06
COS	Standard Cosine	COS	65535		ü	78	0.39868	0.379965	0.389209	0.75672	0.710498	1.00633	1.0031	0.294167	0.294167	0.542336	0.420329	0.705833	0.689982	0.757511	0.419116	0.608692	0.723931	0.67475	0.792677	0.587288	0.412712	0.207323	0.276069	0.32525	3.12	0.999338	1980.54	2156.06	822.16	563.92	1169.74
COS	Standard Cosine	COS	65535		ü	79	0.398635	0.379974	0.389191	0.756684	0.710494	1.00641	1.00314	0.29418	0.29418	0.542345	0.42035	0.70582	0.689987	0.757472	0.419096	0.608649	0.723962	0.674673	0.792558	0.587415	0.412585	0.207442	0.276038	0.325327	3.12	0.999338	1980.64	2155.74	821.9	564.24	1170
COS	Standard Cosine	COS	-1			97	0.400945	0.384598	0.392685	0.756682	0.707408	0.99413	0.997009	0.292804	0.292804	0.541081	0.420083	0.707196	0.692299	0.757322	0.417185	0.608639	0.727096	0.673849	0.788831	0.595767	0.404233	0.211169	0.272904	0.326151	3.12	0.999338	1979.38	2145.58	805.26	574.4	1186.64
COS	Standard Cosine	COS	-1			96	0.400818	0.384426	0.392535	0.756645	0.707531	0.994186	0.997038	0.292872	0.292872	0.541143	0.41993	0.707128	0.692213	0.757288	0.417243	0.608593	0.727002	0.673816	0.788862	0.595564	0.404436	0.211138	0.272998	0.326184	3.12	0.999338	1978.66	2145.66	805.66	574.32	1186.24
COS	Standard Cosine	COS	-1			98	0.400901	0.384623	0.392677	0.756631	0.70745	0.994071	0.996978	0.292821	0.292821	0.541095	0.420011	0.707179	0.692312	0.757268	0.417153	0.608575	0.727147	0.673754	0.788665	0.595959	0.404041	0.211335	0.272853	0.326246	3.12	0.999338	1979.04	2145.12	804.88	574.86	1187.02
COS	Standard Cosine	COS	-1			99	0.400883	0.384706	0.39271	0.756585	0.707484	0.993859	0.996874	0.292817	0.292817	0.541093	0.419905	0.707183	0.692353	0.757216	0.417099	0.608515	0.727237	0.673646	0.788458	0.596248	0.403752	0.211542	0.272763	0.326354	3.12	0.999338	1978.54	2144.56	804.3	575.42	1187.6
COS	Standard Cosine	COS	-1			100	0.400921	0.384827	0.39279	0.756567	0.707374	0.993621	0.996754	0.292792	0.292792	0.541068	0.41993	0.707208	0.692413	0.757193	0.417038	0.608491	0.727334	0.673586	0.788306	0.596521	0.403479	0.211694	0.272666	0.326414	3.12	0.999338	1978.66	2144.14	803.76	575.84	1188.14
COS	Standard Cosine	COS	65535		ü	80	0.398229	0.379706	0.388856	0.756485	0.710782	1.0065	1.00319	0.294354	0.294354	0.542508	0.419994	0.705646	0.689853	0.757265	0.419123	0.608389	0.723921	0.674308	0.792171	0.587535	0.412465	0.207829	0.276079	0.325692	3.12	0.999338	1978.96	2154.68	821.66	565.3	1170.24
COS	Standard Cosine	COS	65535		ü	81	0.398106	0.379607	0.388745	0.756432	0.710825	1.00673	1.0033	0.294409	0.294409	0.542558	0.420027	0.705591	0.689803	0.757211	0.41914	0.608321	0.723892	0.674214	0.79209	0.587516	0.412484	0.20791	0.276108	0.325786	3.12	0.999338	1979.12	2154.46	821.7	565.52	1170.2
COS	Standard Cosine	COS	65535		ü	82	0.397749	0.379395	0.388462	0.756248	0.711062	1.00721	1.00354	0.294558	0.294558	0.542695	0.419883	0.705442	0.689697	0.757018	0.419146	0.608083	0.723882	0.673868	0.791698	0.587696	0.412304	0.208302	0.276118	0.326132	3.12	0.999338	1978.44	2153.4	821.34	566.58	1170.56
COS	Standard Cosine	COS	65535		ü	83	0.397746	0.37946	0.388494	0.756221	0.711037	1.00689	1.00339	0.294549	0.294549	0.542687	0.419769	0.705451	0.68973	0.756987	0.419108	0.60805	0.723943	0.673802	0.791564	0.587895	0.412105	0.208436	0.276057	0.326198	3.12	0.999338	1977.9	2153.04	820.94	566.94	1170.96
COS	Standard Cosine	COS	65535		ü	86	0.397792	0.379683	0.38863	0.756173	0.710897	1.00665	1.00327	0.294507	0.294507	0.542648	0.419866	0.705493	0.689841	0.756929	0.418996	0.607987	0.724127	0.673665	0.791243	0.58844	0.41156	0.208757	0.275873	0.326335	3.12	0.999338	1978.36	2152.16	819.86	567.82	1172.04
COS	Standard Cosine	COS	65535		ü	84	0.397623	0.37941	0.388409	0.756146	0.711075	1.00712	1.0035	0.2946	0.2946	0.542733	0.419832	0.7054	0.689705	0.756908	0.419097	0.607954	0.723961	0.673662	0.791382	0.588028	0.411972	0.208618	0.276039	0.326338	3.12	0.999338	1978.2	2152.54	820.68	567.44	1171.22
COS	Standard Cosine	COS	65535		ü	85	0.397634	0.379518	0.388469	0.756114	0.711011	1.00685	1.00336	0.294583	0.294583	0.542716	0.419798	0.705417	0.689759	0.75687	0.419039	0.607914	0.724056	0.673579	0.791199	0.58832	0.41168	0.208801	0.275944	0.326421	3.12	0.999338	1978.04	2152.04	820.1	567.94	1171.8
COS	Standard Cosine	COS	65535		ü	90	0.397923	0.38011	0.388913	0.756108	0.710757	1.00626	1.00307	0.294409	0.294409	0.542559	0.419921	0.705591	0.690055	0.756845	0.418795	0.607903	0.724458	0.673465	0.790706	0.589404	0.410596	0.209294	0.275542	0.326535	3.12	0.999338	1978.62	2150.7	817.94	569.28	1173.96
COS	Standard Cosine	COS	65535		ü	91	0.397932	0.380143	0.388935	0.756102	0.71074	1.00621	1.00305	0.294401	0.294401	0.542551	0.419909	0.705599	0.690072	0.756836	0.418779	0.607895	0.724484	0.673448	0.790659	0.589484	0.410516	0.209341	0.275516	0.326552	3.12	0.999338	1978.56	2150.58	817.78	569.4	1174.12
COS	Standard Cosine	COS	65535		ü	87	0.397656	0.379617	0.38853	0.756098	0.710901	1.00672	1.0033	0.294562	0.294562	0.542699	0.419875	0.705438	0.689808	0.756849	0.418992	0.60789	0.724135	0.673521	0.791067	0.58855	0.41145	0.208933	0.275865	0.326479	3.12	0.999338	1978.4	2151.68	819.64	568.3	1172.26
COS	Standard Cosine	COS	65535		ü	89	0.397777	0.379861	0.388714	0.756097	0.710922	1.00663	1.00325	0.29449	0.29449	0.542632	0.419849	0.70551	0.68993	0.75684	0.41889	0.607888	0.7243	0.673477	0.790868	0.588993	0.411007	0.209132	0.2757	0.326523	3.12	0.999338	1978.28	2151.14	818.76	568.84	1173.14
COS	Standard Cosine	COS	65535		ü	88	0.397603	0.379624	0.388508	0.756054	0.71099	1.0068	1.00334	0.294579	0.294579	0.542714	0.419803	0.705421	0.689812	0.756801	0.418969	0.607833	0.724172	0.67343	0.790926	0.588698	0.411302	0.209074	0.275828	0.32657	3.12	0.999338	1978.06	2151.3	819.34	568.68	1172.56
COS	Standard Cosine	COS	65535		ü	92	0.397755	0.379989	0.388769	0.756028	0.710744	1.0059	1.00289	0.294481	0.294481	0.542624	0.419828	0.705519	0.689995	0.756761	0.41881	0.6078	0.724433	0.673322	0.790557	0.589432	0.410568	0.209443	0.275567	0.326678	3.12	0.999338	1978.18	2150.3	817.88	569.68	1174.02
COS	Standard Cosine	COS	65535		ü	93	0.39761	0.379938	0.388672	0.755942	0.710769	1.00601	1.00295	0.294536	0.294536	0.542675	0.419845	0.705464	0.689969	0.756669	0.418793	0.607689	0.724461	0.67315	0.790335	0.589603	0.410397	0.209665	0.275539	0.32685	3.12	0.999338	1978.26	2149.7	817.54	570.28	1174.36
COS	Standard Cosine	COS	65535		ü	94	0.397502	0.37991	0.388605	0.755872	0.710769	1.0061	1.00299	0.294579	0.294579	0.542714	0.419862	0.705421	0.689955	0.756595	0.418773	0.607598	0.724493	0.673009	0.790146	0.589764	0.410236	0.209854	0.275507	0.326991	3.12	0.999338	1978.34	2149.18	817.22	570.8	1174.68
COS	Standard Cosine	COS	65535		ü	96	0.397429	0.38	0.388616	0.755777	0.710727	1.00602	1.00295	0.294596	0.294596	0.542729	0.419875	0.705404	0.69	0.75649	0.418697	0.607477	0.724617	0.672812	0.789792	0.590208	0.409792	0.210208	0.275383	0.327188	3.12	0.999338	1978.4	2148.22	816.34	571.76	1175.56
COS	Standard Cosine	COS	65535		ü	95	0.397277	0.379801	0.38844	0.755739	0.710816	1.00632	1.0031	0.294672	0.294672	0.5428	0.419892	0.705328	0.689901	0.756456	0.418762	0.607428	0.724511	0.672766	0.789836	0.589966	0.410034	0.210164	0.275489	0.327234	3.12	0.999338	1978.48	2148.34	816.82	571.64	1175.08
COS	Standard Cosine	COS	65535		ü	98	0.397275	0.379939	0.388509	0.75569	0.71071	1.00588	1.00288	0.294655	0.294655	0.542784	0.419837	0.705345	0.689969	0.756398	0.418683	0.607363	0.724641	0.672634	0.789573	0.590365	0.409635	0.210427	0.275359	0.327366	3.12	0.999338	1978.22	2147.62	816.02	572.36	1175.88
COS	Standard Cosine	COS	65535		ü	99	0.397158	0.379893	0.388428	0.75562	0.710702	1.00573	1.00281	0.294702	0.294702	0.542828	0.419781	0.705298	0.689946	0.756324	0.418672	0.607272	0.724661	0.672497	0.789398	0.590495	0.409505	0.210602	0.275339	0.327503	3.12	0.999338	1977.96	2147.14	815.76	572.84	1176.14
COS	Standard Cosine	COS	65535		ü	97	0.397068	0.379743	0.388308	0.755609	0.710778	1.00607	1.00297	0.294753	0.294753	0.542875	0.419828	0.705247	0.689872	0.756317	0.418729	0.607257	0.724566	0.672503	0.789486	0.590257	0.409743	0.210514	0.275434	0.327497	3.12	0.999338	1978.18	2147.38	816.24	572.6	1175.66
COS	Standard Cosine	COS	65535		ü	100	0.397167	0.379966	0.38847	0.755597	0.710748	1.00573	1.00281	0.294689	0.294689	0.542816	0.419713	0.705311	0.689983	0.756297	0.418632	0.607243	0.724725	0.672442	0.78927	0.590696	0.409304	0.21073	0.275275	0.327558	3.12	0.999338	1977.64	2146.8	815.36	573.18	1176.54
COS	Standard Cosine	COS	65535		ü	6	0.37819	0.342047	0.359663	0.7544	0.752141	1.11819	1.05738	0.306603	0.306603	0.55369	0.406199	0.693397	0.671023	0.756557	0.432463	0.605682	0.701614	0.676577	0.815826	0.52622	0.47378	0.184174	0.298386	0.323423	3.12	0.999338	1913.96	2219	943.7	500.98	1048.2
COS	Standard Cosine	COS	65535		ü	0	0.392993	0.379658	0.386267	0.752404	0.713528	1.00654	1.00321	0.296264	0.296264	0.544266	0.416483	0.703736	0.689829	0.752884	0.417368	0.603127	0.726797	0.666195	0.779932	0.599726	0.400274	0.220068	0.273203	0.333805	3.12	0.999338	1962.42	2121.38	797.36	598.6	1194.54
COS	Standard Cosine	COS	65535		ü	5	0.371663	0.335304	0.353012	0.752258	0.760936	1.14319	1.06912	0.309664	0.309664	0.556441	0.403584	0.690336	0.667652	0.75448	0.434059	0.602934	0.698873	0.67279	0.814543	0.52076	0.47924	0.185457	0.301127	0.32721	3.12	0.999338	1901.64	2215.52	954.64	504.46	1037.26
COS	Standard Cosine	COS	-1			4	0.381583	0.358057	0.36963	0.752171	0.740961	1.08379	1.04099	0.302864	0.302864	0.5503	0.409119	0.697136	0.679028	0.753344	0.425883	0.602824	0.712718	0.668865	0.796319	0.561738	0.438262	0.203681	0.287282	0.331135	3.12	0.999338	1927.72	2165.96	873.04	554.02	1118.86
COS	Standard Cosine	COS	-1			0	0.391413	0.381526	0.386437	0.750054	0.715379	1.00327	1.00159	0.296777	0.296777	0.54474	0.413168	0.703223	0.690763	0.750357	0.415525	0.600111	0.7298	0.661613	0.771518	0.610007	0.389993	0.228482	0.2702	0.338387	3.12	0.999338	1946.8	2098.48	776.88	621.5	1215.02
COS	Standard Cosine	COS	65535		ü	4	0.362777	0.327616	0.344746	0.749044	0.773368	1.17628	1.0845	0.313509	0.313509	0.559893	0.398903	0.686491	0.663808	0.751226	0.435621	0.598811	0.696201	0.666576	0.810628	0.516988	0.483012	0.189372	0.303799	0.333424	3.12	0.999338	1879.58	2204.88	962.12	515.1	1029.78
COS	Standard Cosine	COS	-1			3	0.369921	0.349152	0.359384	0.747045	0.759429	1.12892	1.06244	0.307949	0.307949	0.554904	0.40105	0.692051	0.674576	0.748066	0.427312	0.596264	0.710313	0.659608	0.787867	0.561286	0.438714	0.212133	0.289687	0.340392	3.12	0.999338	1889.7	2142.96	874	577.02	1117.9
COS	Standard Cosine	COS	65535		ü	3	0.349446	0.315992	0.332295	0.744222	0.796637	1.23321	1.11044	0.319312	0.319312	0.565044	0.388767	0.680688	0.657996	0.746354	0.437979	0.592681	0.692124	0.657322	0.80486	0.511131	0.488869	0.19514	0.307876	0.342678	3.12	0.999338	1831.82	2189.22	973.8	530.76	1018.1
COS	Standard Cosine	COS	65535		ü	2	0.326132	0.296611	0.311018	0.735393	0.836447	1.33778	1.15656	0.32935	0.32935	0.573866	0.37341	0.67065	0.648305	0.737349	0.44168	0.581548	0.685703	0.640429	0.792918	0.503693	0.496307	0.207082	0.314297	0.359571	3.12	0.999338	1759.46	2156.68	988.56	563.3	1003.34
COS	Standard Cosine	COS	-1			2	0.340202	0.323586	0.331788	0.734569	0.794842	1.22712	1.10769	0.321404	0.321404	0.5669	0.389828	0.678596	0.661793	0.735383	0.432325	0.580526	0.701841	0.638361	0.770555	0.553031	0.446969	0.229445	0.298159	0.361639	3.12	0.999338	1836.82	2095.9	890.34	624.08	1101.56
COS	Standard Cosine	COS	65535		ü	1	0.274378	0.254483	0.264242	0.714039	0.927625	1.60765	1.26788	0.352029	0.352029	0.593298	0.347174	0.647971	0.627242	0.715441	0.449314	0.55529	0.672228	0.60215	0.761464	0.493019	0.506981	0.238536	0.327772	0.39785	3.12	0.999338	1635.84	2071.14	1009.88	648.84	982.02
COS	Standard Cosine	COS	-1			1	0.28645	0.274758	0.280542	0.71214	0.89596	1.50205	1.22552	0.346396	0.346396	0.588534	0.353706	0.653604	0.637379	0.712744	0.442467	0.552998	0.684318	0.602133	0.742379	0.532379	0.467621	0.257621	0.315682	0.397867	3.12	0.999338	1666.62	2019.26	931.46	700.72	1060.44
PCC	Standard Pearson without IOI	PCCnIOI	65535	ü	ü	17	0.393271	0.379252	0.386196	0.75282	0.722336	1.04754	1.02344	0.296192	0.296192	0.544202	0.418601	0.703808	0.689626	0.753339	0.417712	0.603657	0.726239	0.667032	0.781479	0.597773	0.402227	0.218521	0.273761	0.332968	3.12	0.999338	1972.4	2125.58	801.22	594.4	1190.68
PCC	Standard Pearson without IOI	PCCnIOI	65535	ü	ü	18	0.393239	0.379251	0.38618	0.75279	0.722366	1.04849	1.0239	0.296205	0.296205	0.544216	0.418686	0.703795	0.689626	0.753307	0.417703	0.603617	0.726259	0.66698	0.78139	0.597861	0.402139	0.21861	0.273741	0.33302	3.12	0.999338	1972.8	2125.34	801.04	594.64	1190.86
PCC	Standard Pearson without IOI	PCCnIOI	65535	ü	ü	16	0.393121	0.379168	0.38608	0.752738	0.722939	1.04886	1.02408	0.296256	0.296256	0.544263	0.418317	0.703744	0.689584	0.753253	0.417714	0.603549	0.726241	0.66688	0.781298	0.59787	0.40213	0.218702	0.273759	0.33312	3.12	0.999338	1971.06	2125.08	801.02	594.9	1190.88
PCC	Standard Pearson without IOI	PCCnIOI	65535	ü	ü	15	0.39311	0.37919	0.386086	0.75271	0.722905	1.04907	1.02419	0.296256	0.296256	0.544264	0.418606	0.703744	0.689595	0.753222	0.41769	0.603514	0.726283	0.666828	0.781188	0.598002	0.401998	0.218812	0.273717	0.333172	3.12	0.999338	1972.42	2124.8	800.74	595.18	1191.16
PCC	Standard Pearson without IOI	PCCnIOI	65535	ü	ü	19	0.39281	0.378859	0.38577	0.752612	0.722306	1.04773	1.02353	0.296404	0.296404	0.544395	0.418402	0.703596	0.689429	0.753128	0.417785	0.603394	0.726116	0.666693	0.781172	0.597687	0.402313	0.218828	0.273884	0.333307	3.12	0.999338	1971.46	2124.76	801.4	595.22	1190.5
PCC	Standard Pearson without IOI	PCCnIOI	65535	ü	ü	24	0.392997	0.379458	0.386167	0.752504	0.72085	1.04692	1.02313	0.296272	0.296272	0.544278	0.419811	0.703728	0.689729	0.752995	0.417487	0.60325	0.726609	0.666388	0.780364	0.599094	0.400906	0.219636	0.273391	0.333612	3.12	0.999338	1978.1	2122.56	798.58	597.42	1193.32
PCC	Standard Pearson without IOI	PCCnIOI	65535	ü	ü	25	0.392877	0.379329	0.386042	0.752452	0.720965	1.04785	1.02358	0.296336	0.296336	0.544336	0.419888	0.703664	0.689664	0.752944	0.417521	0.603185	0.726549	0.666327	0.780325	0.599004	0.400996	0.219675	0.273451	0.333673	3.12	0.999338	1978.46	2122.46	798.78	597.52	1193.12
PCC	Standard Pearson without IOI	PCCnIOI	65535	ü	ü	20	0.39248	0.378719	0.385537	0.752398	0.721823	1.04737	1.02335	0.29654	0.29654	0.544521	0.41878	0.70346	0.68936	0.752902	0.417751	0.603118	0.726175	0.666305	0.780638	0.598081	0.401919	0.219362	0.273825	0.333695	3.12	0.999338	1973.24	2123.32	800.6	596.66	1191.3
PCC	Standard Pearson without IOI	PCCnIOI	65535	ü	ü	26	0.392798	0.379346	0.386012	0.752377	0.721152	1.04889	1.02408	0.296366	0.296366	0.54436	0.419985	0.703634	0.689673	0.752865	0.41748	0.603092	0.726615	0.666184	0.780091	0.599255	0.400745	0.219909	0.273385	0.333816	3.12	0.999338	1978.92	2121.82	798.28	598.16	1193.62
COS	Cosine without IOI	COSnIOI	-1	ü		25	0.387511	0.372252	0.379804	0.751198	0.720103	1.0266	1.01317	0.299044	0.299044	0.546815	0.415558	0.700956	0.686126	0.751802	0.419919	0.601581	0.722613	0.664898	0.782198	0.590054	0.409946	0.217802	0.277387	0.335102	3.12	0.999338	1958.06	2127.56	816.64	592.42	1175.26
COS	Cosine without IOI	COSnIOI	-1	ü		27	0.387642	0.372522	0.380004	0.751181	0.71942	1.02524	1.01249	0.298976	0.298976	0.546751	0.41591	0.701024	0.686261	0.751779	0.419797	0.60156	0.722807	0.664834	0.781945	0.590576	0.409424	0.218055	0.277193	0.335166	3.12	0.999338	1959.72	2126.86	815.62	593.12	1176.28
PCC	Standard Pearson without IOI	PCCnIOI	65535	ü	ü	14	0.392025	0.378025	0.38496	0.752339	0.724289	1.0516	1.02542	0.296778	0.296778	0.544744	0.417549	0.703222	0.689012	0.752858	0.418018	0.603037	0.725744	0.666281	0.78101	0.597015	0.402985	0.21899	0.274256	0.333719	3.12	0.999338	1967.44	2124.32	802.72	595.66	1189.18
COS	Cosine without IOI	COSnIOI	-1	ü		26	0.387553	0.372356	0.379877	0.751178	0.719798	1.02586	1.0128	0.299027	0.299027	0.546798	0.415723	0.700973	0.686178	0.75178	0.419868	0.601557	0.722693	0.664861	0.782071	0.590284	0.409716	0.217929	0.277307	0.335139	3.12	0.999338	1958.84	2127.2	816.2	592.78	1175.7
PCC	Standard Pearson without IOI	PCCnIOI	65535	ü	ü	22	0.392345	0.378736	0.385479	0.75228	0.721228	1.04622	1.02279	0.296591	0.296591	0.544569	0.419255	0.703409	0.689368	0.752777	0.417692	0.602964	0.726273	0.666072	0.780274	0.598462	0.401538	0.219726	0.273727	0.333928	3.12	0.999338	1975.48	2122.32	799.84	597.66	1192.06
COS	Cosine without IOI	COSnIOI	-1	ü		28	0.387592	0.372463	0.379951	0.751168	0.719204	1.02453	1.01214	0.299002	0.299002	0.546773	0.415906	0.700998	0.686232	0.751766	0.419818	0.601544	0.722773	0.664819	0.781955	0.590508	0.409492	0.218045	0.277227	0.335181	3.12	0.999338	1959.7	2126.88	815.76	593.1	1176.14
PCC	Standard Pearson without IOI	PCCnIOI	65535	ü	ü	21	0.392161	0.37846	0.385248	0.752256	0.721738	1.04737	1.02335	0.296684	0.296684	0.544658	0.418941	0.703316	0.68923	0.752758	0.417798	0.60293	0.726105	0.666056	0.780415	0.598045	0.401955	0.219585	0.273895	0.333944	3.12	0.999338	1974	2122.7	800.66	597.28	1191.24
PCC	Standard Pearson without IOI	PCCnIOI	65535	ü	ü	23	0.39233	0.378806	0.385507	0.752241	0.721343	1.04681	1.02308	0.296591	0.296591	0.544569	0.419174	0.703409	0.689403	0.752733	0.417647	0.602914	0.726345	0.665985	0.780107	0.598699	0.401301	0.219893	0.273655	0.334015	3.12	0.999338	1975.1	2121.86	799.38	598.12	1192.52
PCC	Standard Pearson without IOI	PCCnIOI	65535	ü	ü	29	0.392322	0.378957	0.38558	0.752155	0.721929	1.0511	1.02516	0.296582	0.296582	0.544559	0.419612	0.703418	0.689478	0.752637	0.41755	0.602808	0.726503	0.665818	0.779737	0.59922	0.40078	0.220263	0.273497	0.334182	3.12	0.999338	1977.16	2120.86	798.34	599.12	1193.56
PCC	Standard Pearson without IOI	PCCnIOI	65535	ü	ü	28	0.391789	0.378429	0.38505	0.751956	0.721988	1.05082	1.02503	0.296833	0.296833	0.544787	0.419459	0.703167	0.689214	0.752438	0.417682	0.602552	0.726285	0.665504	0.779558	0.598871	0.401129	0.220442	0.273715	0.334496	3.12	0.999338	1976.44	2120.38	799.04	599.6	1192.86
COS	Cosine without IOI	COSnIOI	-1	ü		29	0.387316	0.372286	0.379725	0.751014	0.719377	1.02526	1.0125	0.299125	0.299125	0.546883	0.415876	0.700875	0.686143	0.751606	0.419826	0.601349	0.72276	0.664556	0.781639	0.590647	0.409353	0.218361	0.27724	0.335444	3.12	0.999338	1959.56	2126.02	815.48	593.96	1176.42
PCC	Standard Pearson without IOI	PCCnIOI	65535	ü	ü	13	0.391279	0.377513	0.384333	0.751955	0.724828	1.05295	1.02608	0.297109	0.297109	0.545045	0.417561	0.702891	0.688756	0.752462	0.41806	0.602545	0.725672	0.665606	0.780267	0.597246	0.402754	0.219733	0.274328	0.334394	3.12	0.999338	1967.5	2122.3	802.26	597.68	1189.64
PCC	Standard Pearson without IOI	PCCnIOI	65535	ü	ü	30	0.391786	0.37842	0.385044	0.751939	0.722459	1.05207	1.02564	0.296841	0.296841	0.544793	0.419213	0.703159	0.68921	0.752423	0.417681	0.602535	0.726285	0.6655	0.779527	0.598893	0.401107	0.220473	0.273715	0.3345	3.12	0.999338	1975.28	2120.3	799	599.68	1192.9
PCC	Standard Pearson without IOI	PCCnIOI	65535	ü	ü	27	0.391565	0.378082	0.384763	0.751923	0.721793	1.05049	1.02487	0.296952	0.296952	0.544898	0.419599	0.703048	0.689041	0.752413	0.417816	0.60251	0.726067	0.665498	0.77974	0.598342	0.401658	0.22026	0.273933	0.334502	3.12	0.999338	1977.1	2120.88	800.1	599.1	1191.8
PCC	Standard Pearson without IOI	PCCnIOI	65535	ü	ü	32	0.391575	0.378101	0.384778	0.751913	0.723117	1.05443	1.02679	0.296952	0.296952	0.544892	0.419179	0.703048	0.689051	0.752403	0.417803	0.602503	0.726082	0.665493	0.779705	0.598396	0.401604	0.220295	0.273918	0.334507	3.12	0.999338	1975.12	2120.78	800	599.2	1191.9
COS	Cosine without IOI	COSnIOI	-1	ü		22	0.386668	0.371514	0.379013	0.750842	0.721398	1.02788	1.0138	0.299439	0.299439	0.547174	0.41442	0.700561	0.685757	0.751443	0.420069	0.601123	0.722365	0.664303	0.781725	0.589789	0.410211	0.218275	0.277635	0.335697	3.12	0.999338	1952.7	2126.24	817.18	593.74	1174.72
COS	Cosine without IOI	COSnIOI	-1	ü		23	0.386537	0.371294	0.378837	0.750836	0.721237	1.0281	1.01391	0.299502	0.299502	0.54723	0.414701	0.700498	0.685647	0.751441	0.420151	0.601118	0.722228	0.664309	0.781865	0.589429	0.410571	0.218135	0.277772	0.335691	3.12	0.999338	1954.02	2126.64	817.88	593.34	1174.02
COS	Cosine without IOI	COSnIOI	-1	ü		24	0.386524	0.371295	0.378832	0.750818	0.72088	1.02773	1.01372	0.299507	0.299507	0.547234	0.414938	0.700493	0.685648	0.751422	0.420146	0.601096	0.722239	0.664285	0.781812	0.589483	0.410517	0.218188	0.277761	0.335715	3.12	0.999338	1955.14	2126.5	817.76	593.48	1174.14
COS	Cosine without IOI	COSnIOI	-1	ü		31	0.386611	0.371662	0.379061	0.75072	0.719344	1.02465	1.01219	0.299447	0.299447	0.547181	0.415681	0.700553	0.685831	0.751308	0.419959	0.600969	0.722544	0.664067	0.781249	0.590413	0.409587	0.218751	0.277456	0.335933	3.12	0.999338	1958.64	2124.96	815.94	595.02	1175.96
PCC	Standard Pearson without IOI	PCCnIOI	65535	ü	ü	31	0.391682	0.378299	0.384931	0.751911	0.722688	1.05265	1.02592	0.296892	0.296892	0.544839	0.419064	0.703108	0.68915	0.752396	0.417719	0.6025	0.72622	0.665461	0.779542	0.598758	0.401242	0.220458	0.27378	0.334539	3.12	0.999338	1974.58	2120.34	799.28	599.64	1192.62
COS	Cosine without IOI	COSnIOI	-1	ü		30	0.386524	0.371608	0.378991	0.750673	0.719411	1.02536	1.01255	0.299485	0.299485	0.547216	0.415881	0.700515	0.685804	0.751259	0.419961	0.600909	0.72254	0.663984	0.781153	0.590456	0.409544	0.218847	0.27746	0.336016	3.12	0.999338	1959.58	2124.7	815.86	595.28	1176.04
COS	Cosine without IOI	COSnIOI	-1	ü		35	0.386649	0.371975	0.379239	0.750609	0.719649	1.02446	1.0121	0.299401	0.299401	0.547139	0.41515	0.700599	0.685987	0.75118	0.419783	0.600826	0.722837	0.663812	0.780666	0.591309	0.408691	0.219334	0.277163	0.336188	3.12	0.999338	1956.14	2123.38	814.14	596.6	1177.76
COS	Cosine without IOI	COSnIOI	-1	ü		20	0.385799	0.370443	0.378041	0.750606	0.722803	1.03094	1.01531	0.299868	0.299868	0.547568	0.413703	0.700132	0.685221	0.75122	0.420408	0.600821	0.721805	0.663993	0.781865	0.588578	0.411422	0.218135	0.278195	0.336007	3.12	0.999338	1949.32	2126.64	819.6	593.34	1172.3
PCC	Standard Pearson without IOI	PCCnIOI	65535	ü	ü	11	0.390899	0.377007	0.383889	0.751874	0.727251	1.05813	1.0286	0.297295	0.297295	0.545219	0.416233	0.702705	0.688503	0.752388	0.418236	0.602439	0.725387	0.665512	0.780418	0.596588	0.403412	0.219582	0.274613	0.334488	3.12	0.999338	1961.24	2122.72	803.56	597.26	1188.34
PCC	Standard Pearson without IOI	PCCnIOI	65535	ü	ü	12	0.390738	0.376929	0.38377	0.751771	0.72588	1.05613	1.02763	0.297368	0.297368	0.545282	0.417231	0.702632	0.688464	0.752281	0.418224	0.60231	0.725405	0.665333	0.780179	0.59675	0.40325	0.219821	0.274595	0.334667	3.12	0.999338	1965.94	2122.06	803.24	597.92	1188.66
COS	Cosine without IOI	COSnIOI	-1	ü		21	0.385707	0.370575	0.378064	0.750472	0.722323	1.02974	1.01472	0.299889	0.299889	0.547585	0.413911	0.700111	0.685287	0.751073	0.420297	0.600651	0.721986	0.663721	0.781364	0.589211	0.410789	0.218636	0.278014	0.336279	3.12	0.999338	1950.3	2125.28	818.34	594.7	1173.56
COS	Cosine without IOI	COSnIOI	-1	ü		36	0.386424	0.371941	0.379112	0.750438	0.719653	1.02501	1.01237	0.29949	0.29949	0.54722	0.415414	0.70051	0.68597	0.750998	0.419725	0.600609	0.722927	0.663497	0.780191	0.591749	0.408251	0.219809	0.277073	0.336503	3.12	0.999338	1957.38	2122.1	813.28	597.88	1178.62
COS	Cosine without IOI	COSnIOI	-1	ü		33	0.385868	0.371033	0.378376	0.750391	0.719713	1.02475	1.01225	0.299787	0.299787	0.547492	0.415163	0.700213	0.685516	0.750973	0.420078	0.600547	0.72235	0.663518	0.780763	0.59027	0.40973	0.219237	0.27765	0.336482	3.12	0.999338	1956.2	2123.64	816.22	596.34	1175.68
PCC	Standard Pearson without IOI	PCCnIOI	65535	ü	ü	10	0.389957	0.375674	0.382748	0.751693	0.729246	1.06511	1.03198	0.297779	0.297779	0.545657	0.416076	0.702221	0.687837	0.752232	0.418709	0.602213	0.724608	0.665349	0.780934	0.59474	0.40526	0.219066	0.275392	0.334651	3.12	0.999338	1960.5	2124.12	807.24	595.86	1184.66
COS	Cosine without IOI	COSnIOI	-1	ü		17	0.385168	0.369886	0.377448	0.750349	0.723737	1.03306	1.01635	0.300156	0.300156	0.547833	0.41316	0.699844	0.684943	0.750961	0.420523	0.600488	0.721616	0.663552	0.78153	0.588356	0.411644	0.21847	0.278384	0.336448	3.12	0.999338	1946.76	2125.72	820.04	594.26	1171.86
COS	Cosine without IOI	COSnIOI	-1	ü		34	0.385851	0.371123	0.378413	0.750325	0.719917	1.02506	1.0124	0.299787	0.299787	0.547489	0.415036	0.700213	0.685561	0.7509	0.420016	0.600467	0.722454	0.663396	0.780498	0.590624	0.409376	0.219502	0.277546	0.336604	3.12	0.999338	1955.6	2122.92	815.5	597.06	1176.4
COS	Cosine without IOI	COSnIOI	65535	ü	ü	18	0.37921	0.354803	0.366801	0.751627	0.732795	1.06602	1.03243	0.304095	0.304095	0.55142	0.412931	0.695905	0.677402	0.752871	0.426904	0.602123	0.711013	0.668197	0.797223	0.55758	0.44242	0.202777	0.288987	0.331803	3.12	0.999338	1945.68	2168.42	881.3	551.56	1110.6
COS	Cosine without IOI	COSnIOI	-1	ü		32	0.385608	0.370846	0.378153	0.750271	0.719967	1.02555	1.01264	0.299901	0.299901	0.547598	0.415168	0.700099	0.685423	0.750851	0.4201	0.600391	0.722311	0.663297	0.780551	0.590295	0.409705	0.219449	0.277689	0.336703	3.12	0.999338	1956.22	2123.06	816.18	596.92	1175.72
COS	Cosine without IOI	COSnIOI	-1	ü		37	0.385992	0.371524	0.378687	0.750269	0.719938	1.02519	1.01247	0.299693	0.299693	0.547407	0.415045	0.700307	0.685762	0.75083	0.419826	0.600392	0.722764	0.663229	0.780017	0.591507	0.408493	0.219983	0.277236	0.336771	3.12	0.999338	1955.64	2121.62	813.76	598.36	1178.14
COS	Cosine without IOI	COSnIOI	-1	ü		18	0.385147	0.370063	0.377528	0.750254	0.723741	1.03321	1.01643	0.300148	0.300148	0.547826	0.413253	0.699852	0.685032	0.750854	0.420413	0.600366	0.721797	0.66335	0.781112	0.588952	0.411048	0.218888	0.278203	0.33665	3.12	0.999338	1947.2	2124.58	818.86	595.4	1173.04
COS	Cosine without IOI	COSnIOI	65535	ü	ü	24	0.381092	0.358767	0.369759	0.751606	0.728838	1.05588	1.02751	0.302911	0.302911	0.550345	0.414404	0.697089	0.679384	0.752693	0.425395	0.602094	0.713544	0.667548	0.794021	0.564746	0.435254	0.205979	0.286456	0.332452	3.12	0.999338	1952.62	2159.7	867	560.28	1124.9
COS	Cosine without IOI	COSnIOI	65535	ü	ü	14	0.378097	0.352656	0.365153	0.751568	0.736373	1.07647	1.03747	0.304761	0.304761	0.552024	0.412192	0.695239	0.676328	0.752891	0.42768	0.602049	0.70971	0.668387	0.798723	0.553934	0.446066	0.201277	0.29029	0.331613	3.12	0.999338	1942.2	2172.52	888.54	547.46	1103.36
PCC	Standard Pearson without IOI	PCCnIOI	65535	ü	ü	33	0.390753	0.377374	0.384004	0.751561	0.723919	1.05678	1.02793	0.297334	0.297334	0.545244	0.418831	0.702666	0.688687	0.752047	0.417956	0.602049	0.725836	0.664917	0.779232	0.598142	0.401858	0.220768	0.274164	0.335083	3.12	0.999338	1973.48	2119.48	800.5	600.5	1191.4
COS	Cosine without IOI	COSnIOI	65535	ü	ü	25	0.381194	0.359309	0.370087	0.751484	0.728766	1.05534	1.02724	0.302805	0.302805	0.550251	0.414259	0.697195	0.679654	0.752541	0.42514	0.601936	0.713971	0.667224	0.793227	0.566081	0.433919	0.206773	0.286029	0.332776	3.12	0.999338	1951.94	2157.54	864.34	562.44	1127.56
COS	Cosine without IOI	COSnIOI	-1	ü		19	0.384703	0.369621	0.377085	0.75008	0.723474	1.03251	1.01608	0.300356	0.300356	0.548011	0.413351	0.699644	0.68481	0.75068	0.420521	0.60015	0.721616	0.663086	0.780943	0.588677	0.411323	0.219057	0.278384	0.336914	3.12	0.999338	1947.66	2124.14	819.4	595.84	1172.5
COS	Cosine without IOI	COSnIOI	65535	ü	ü	21	0.379816	0.3566	0.368023	0.751457	0.731033	1.06071	1.02986	0.303632	0.303632	0.550999	0.413436	0.696368	0.6783	0.752613	0.426159	0.601904	0.712264	0.667553	0.795277	0.561323	0.438677	0.204723	0.287736	0.332447	3.12	0.999338	1948.06	2163.12	873.82	556.86	1118.08
PCC	Standard Pearson without IOI	PCCnIOI	65535	ü	ü	35	0.390648	0.377518	0.384026	0.751419	0.724331	1.05861	1.02882	0.297359	0.297359	0.545272	0.418733	0.702641	0.688759	0.751892	0.417832	0.601862	0.726036	0.664612	0.778694	0.598824	0.401176	0.221306	0.273964	0.335388	3.12	0.999338	1973.02	2118.02	799.16	601.96	1192.74
PCC	Standard Pearson without IOI	PCCnIOI	65535	ü	ü	36	0.390668	0.37756	0.384057	0.751411	0.724471	1.05853	1.02878	0.297346	0.297346	0.545258	0.418499	0.702654	0.68878	0.751882	0.417808	0.601855	0.726072	0.664596	0.778636	0.598924	0.401076	0.221364	0.273928	0.335404	3.12	0.999338	1971.92	2117.88	798.96	602.1	1192.94
COS	Cosine without IOI	COSnIOI	-1	ü		16	0.384098	0.368841	0.376391	0.749933	0.72403	1.034	1.01681	0.300657	0.300657	0.548296	0.413228	0.699343	0.684421	0.750544	0.42078	0.599951	0.721203	0.662895	0.781109	0.587733	0.412267	0.218891	0.278797	0.337105	3.12	0.999338	1947.08	2124.58	821.26	595.4	1170.64
COS	Cosine without IOI	COSnIOI	-1	ü		38	0.385034	0.370713	0.377804	0.749846	0.720409	1.02604	1.01288	0.300131	0.300131	0.547805	0.414739	0.699869	0.685357	0.750399	0.419978	0.599851	0.722514	0.66252	0.779391	0.591323	0.408677	0.220609	0.277486	0.33748	3.12	0.999338	1954.2	2119.92	814.12	600.06	1177.78
PCC	Standard Pearson without IOI	PCCnIOI	65535	ü	ü	34	0.390525	0.377289	0.383849	0.751401	0.724323	1.05814	1.02859	0.297427	0.297427	0.545329	0.418635	0.702573	0.688645	0.751879	0.417922	0.601847	0.725892	0.664633	0.778822	0.598468	0.401532	0.221178	0.274108	0.335367	3.12	0.999338	1972.56	2118.38	799.84	601.6	1192.06
COS	Cosine without IOI	COSnIOI	-1	ü		39	0.384941	0.370704	0.377754	0.749775	0.720248	1.02569	1.01271	0.300169	0.300169	0.547841	0.414811	0.699831	0.685352	0.750324	0.419952	0.599758	0.722557	0.662384	0.779189	0.591515	0.408485	0.220811	0.277443	0.337616	3.12	0.999338	1954.54	2119.36	813.74	600.62	1178.16
COS	Cosine without IOI	COSnIOI	65535	ü	ü	26	0.380964	0.359382	0.370014	0.751304	0.728728	1.05495	1.02705	0.302868	0.302868	0.55031	0.414204	0.697132	0.679691	0.752341	0.425044	0.601704	0.714132	0.666833	0.792626	0.566757	0.433243	0.207374	0.285868	0.333167	3.12	0.999338	1951.68	2155.9	863	564.08	1128.9
COS	Cosine without IOI	COSnIOI	65535	ü	ü	20	0.379078	0.355536	0.367116	0.7513	0.731716	1.06258	1.03077	0.304027	0.304027	0.551356	0.413245	0.695973	0.677768	0.752482	0.426505	0.601705	0.711685	0.667393	0.795647	0.559888	0.440112	0.204353	0.288315	0.332607	3.12	0.999338	1947.16	2164.12	876.68	555.86	1115.22
COS	Cosine without IOI	COSnIOI	65535	ü	ü	22	0.379632	0.356789	0.368031	0.751265	0.730604	1.05982	1.02943	0.303662	0.303662	0.551029	0.413644	0.696338	0.678394	0.752393	0.426018	0.601656	0.712506	0.667126	0.794541	0.562248	0.437752	0.205459	0.287494	0.332874	3.12	0.999338	1949.04	2161.12	871.96	558.86	1119.94
COS	Cosine without IOI	COSnIOI	65535	ü	ü	19	0.378656	0.354837	0.366551	0.751251	0.732468	1.06459	1.03174	0.304265	0.304265	0.55157	0.41285	0.695735	0.677418	0.752456	0.426746	0.601642	0.711275	0.667382	0.79605	0.558786	0.441214	0.20395	0.288725	0.332618	3.12	0.999338	1945.3	2165.22	878.9	554.76	1113
COS	Cosine without IOI	COSnIOI	65535	ü	ü	30	0.381201	0.360242	0.370572	0.751179	0.727943	1.05248	1.02586	0.302669	0.302669	0.550122	0.414221	0.697331	0.680121	0.752171	0.424661	0.601548	0.714767	0.666434	0.791562	0.568681	0.431319	0.208438	0.285233	0.333566	3.12	0.999338	1951.76	2153	859.16	566.98	1132.74
COS	Cosine without IOI	COSnIOI	-1	ü		40	0.384834	0.370691	0.377694	0.749688	0.719912	1.02537	1.01255	0.300211	0.300211	0.547879	0.415206	0.699789	0.685345	0.750231	0.419921	0.599648	0.722606	0.662228	0.778943	0.591748	0.408252	0.221057	0.277394	0.337772	3.12	0.999338	1956.4	2118.7	813.28	601.28	1178.62
COS	Cosine without IOI	COSnIOI	65535	ü	ü	17	0.377868	0.353419	0.365437	0.751171	0.733635	1.06785	1.03331	0.304728	0.304728	0.551993	0.412549	0.695272	0.676709	0.752425	0.427249	0.601538	0.710432	0.667436	0.79693	0.556488	0.443512	0.20307	0.289568	0.332564	3.12	0.999338	1943.88	2167.62	883.48	552.36	1108.42
COS	Cosine without IOI	COSnIOI	65535	ü	ü	31	0.381368	0.360595	0.370834	0.751166	0.72782	1.05184	1.02554	0.302571	0.302571	0.550032	0.414166	0.697429	0.680297	0.752145	0.424521	0.601532	0.714998	0.66637	0.791254	0.569341	0.430659	0.208746	0.285002	0.33363	3.12	0.999338	1951.5	2152.16	857.86	567.82	1134.04
COS	Cosine without IOI	COSnIOI	-1	ü		41	0.384465	0.370313	0.377321	0.749557	0.719925	1.02512	1.01243	0.300385	0.300385	0.54804	0.415095	0.699615	0.685157	0.750101	0.420021	0.599479	0.722443	0.662022	0.778849	0.591465	0.408535	0.221151	0.277557	0.337978	3.12	0.999338	1955.88	2118.44	813.84	601.54	1178.06
PCC	Standard Pearson without IOI	PCCnIOI	65535	ü	ü	37	0.390232	0.377291	0.383705	0.751162	0.724573	1.05885	1.02894	0.297542	0.297542	0.545437	0.418504	0.702458	0.688645	0.751625	0.417813	0.601536	0.726064	0.664168	0.778114	0.599177	0.400823	0.221886	0.273936	0.335832	3.12	0.999338	1971.94	2116.46	798.46	603.52	1193.44
COS	Cosine without IOI	COSnIOI	65535	ü	ü	27	0.380752	0.35937	0.369904	0.751156	0.728618	1.0544	1.02679	0.302941	0.302941	0.550376	0.414085	0.697059	0.679685	0.752179	0.424992	0.601514	0.71422	0.666532	0.792187	0.567183	0.432817	0.207813	0.28578	0.333468	3.12	0.999338	1951.12	2154.7	862.14	565.28	1129.76
COS	Cosine without IOI	COSnIOI	-1	ü		42	0.384231	0.370255	0.377177	0.74939	0.720341	1.02562	1.01268	0.300479	0.300479	0.548126	0.414688	0.699521	0.685128	0.749924	0.419971	0.599262	0.722529	0.661702	0.778388	0.591867	0.408133	0.221612	0.277471	0.338298	3.12	0.999338	1953.96	2117.18	813.02	602.8	1178.88
COS	Cosine without IOI	COSnIOI	-1	ü		15	0.382761	0.367789	0.375199	0.749298	0.724611	1.03598	1.01778	0.301264	0.301264	0.548844	0.413181	0.698736	0.683895	0.749894	0.420945	0.599145	0.720927	0.661834	0.780054	0.587735	0.412265	0.219946	0.279073	0.338166	3.12	0.999338	1946.86	2121.72	821.26	598.26	1170.64
COS	Cosine without IOI	COSnIOI	-1	ü		43	0.383909	0.36991	0.376843	0.74928	0.7204	1.02583	1.01278	0.300631	0.300631	0.548266	0.414663	0.699369	0.684955	0.749816	0.420067	0.599122	0.722371	0.661539	0.778333	0.591577	0.408423	0.221667	0.277629	0.338461	3.12	0.999338	1953.84	2117.04	813.6	602.94	1178.3
COS	Cosine without IOI	COSnIOI	65535	ü	ü	23	0.379484	0.357105	0.368122	0.751052	0.730333	1.05874	1.0289	0.303671	0.303671	0.551035	0.413461	0.696329	0.678552	0.752149	0.425817	0.601383	0.712839	0.666645	0.793656	0.563449	0.436551	0.206344	0.287161	0.333355	3.12	0.999338	1948.18	2158.7	869.58	561.28	1122.32
COS	Cosine without IOI	COSnIOI	-1	ü		14	0.381787	0.366607	0.374119	0.749028	0.724972	1.03686	1.01822	0.301748	0.301748	0.549284	0.412901	0.698252	0.683304	0.74964	0.421308	0.598801	0.72032	0.661467	0.780186	0.586422	0.413578	0.219814	0.27968	0.338533	3.12	0.999338	1945.54	2122.08	823.9	597.9	1168
COS	Cosine without IOI	COSnIOI	-1	ü		44	0.383393	0.369528	0.376395	0.749021	0.720562	1.02608	1.0129	0.300865	0.300865	0.548478	0.414561	0.699135	0.684764	0.74955	0.420115	0.598792	0.72229	0.661103	0.777869	0.591659	0.408341	0.222131	0.27771	0.338897	3.12	0.999338	1953.36	2115.78	813.44	604.2	1178.46
PCC	Standard Pearson without IOI	PCCnIOI	65535	ü	ü	38	0.389947	0.377045	0.383441	0.751039	0.725027	1.06012	1.02955	0.297673	0.297673	0.545559	0.418287	0.702327	0.688523	0.751501	0.417861	0.601377	0.725986	0.663961	0.777939	0.599106	0.400894	0.222061	0.274014	0.336039	3.12	0.999338	1970.92	2115.98	798.6	604	1193.3
COS	Cosine without IOI	COSnIOI	65535	ü	ü	28	0.380518	0.359288	0.369748	0.751022	0.728609	1.05445	1.02681	0.30303	0.30303	0.550453	0.4142	0.69697	0.679644	0.752036	0.424968	0.601345	0.714255	0.666263	0.791848	0.56744	0.43256	0.208152	0.285745	0.333737	3.12	0.999338	1951.66	2153.78	861.64	566.2	1130.26
COS	Cosine without IOI	COSnIOI	-1	ü		46	0.382913	0.369092	0.375937	0.748824	0.721164	1.02711	1.01341	0.301086	0.301086	0.548679	0.414115	0.698914	0.684546	0.74935	0.42021	0.598541	0.722132	0.66078	0.777622	0.59147	0.40853	0.222378	0.277868	0.33922	3.12	0.999338	1951.26	2115.12	813.82	604.86	1178.08
PCC	Standard Pearson without IOI	PCCnIOI	65535	ü	ü	9	0.387994	0.37363	0.380743	0.75099	0.730744	1.06881	1.03377	0.298717	0.298717	0.546522	0.415393	0.701283	0.686815	0.751537	0.419256	0.601305	0.723715	0.664279	0.780455	0.593175	0.406825	0.219545	0.276285	0.335721	3.12	0.999338	1957.28	2122.82	810.36	597.16	1181.54
COS	Cosine without IOI	COSnIOI	-1	ü		45	0.382803	0.368955	0.375814	0.748793	0.721088	1.02691	1.01332	0.301141	0.301141	0.54873	0.414123	0.698859	0.684478	0.749322	0.420252	0.598501	0.722064	0.660738	0.777638	0.591317	0.408683	0.222362	0.277936	0.339262	3.12	0.999338	1951.3	2115.16	814.12	604.82	1177.78
COS	Cosine without IOI	COSnIOI	65535	ü	ü	32	0.380842	0.360128	0.370338	0.750953	0.727743	1.05146	1.02535	0.302809	0.302809	0.550247	0.414196	0.697191	0.680064	0.75193	0.424618	0.601261	0.714836	0.666006	0.79098	0.569148	0.430852	0.20902	0.285164	0.333994	3.12	0.999338	1951.64	2151.42	858.24	568.56	1133.66
COS	Cosine without IOI	COSnIOI	-1	ü		47	0.382562	0.368841	0.375638	0.74864	0.721245	1.02682	1.01327	0.301247	0.301247	0.548826	0.413903	0.698753	0.684421	0.749163	0.420235	0.598307	0.722091	0.660472	0.77728	0.591561	0.408439	0.22272	0.277909	0.339528	3.12	0.999338	1950.26	2114.18	813.64	605.8	1178.26
COS	Cosine without IOI	COSnIOI	65535	ü	ü	29	0.380466	0.359452	0.369808	0.750923	0.728652	1.05391	1.02655	0.303025	0.303025	0.550447	0.413869	0.696975	0.679726	0.751922	0.424868	0.60122	0.714422	0.666044	0.791422	0.56803	0.43197	0.208578	0.285578	0.333956	3.12	0.999338	1950.1	2152.62	860.46	567.36	1131.44
COS	Cosine without IOI	COSnIOI	65535	ü	ü	15	0.376687	0.351816	0.364037	0.750905	0.736296	1.07496	1.03674	0.30533	0.30533	0.552538	0.411687	0.69467	0.675908	0.752193	0.427742	0.601196	0.709606	0.667081	0.797361	0.554455	0.445545	0.202639	0.290394	0.332919	3.12	0.999338	1939.82	2168.8	887.5	551.18	1104.4
COS	Cosine without IOI	COSnIOI	65535	ü	ü	33	0.380692	0.360087	0.370244	0.750859	0.727489	1.05082	1.02504	0.302864	0.302864	0.550297	0.414302	0.697136	0.680043	0.751827	0.424599	0.601142	0.714864	0.665828	0.790731	0.569356	0.430644	0.209269	0.285136	0.334172	3.12	0.999338	1952.14	2150.76	857.84	569.22	1134.06
COS	Cosine without IOI	COSnIOI	-1	ü		49	0.381908	0.36838	0.375082	0.748307	0.721899	1.02798	1.01385	0.30154	0.30154	0.549092	0.41347	0.69846	0.68419	0.748819	0.420285	0.59788	0.722008	0.6599	0.776655	0.591725	0.408275	0.223345	0.277992	0.3401	3.12	0.999338	1948.22	2112.48	813.32	607.5	1178.58
COS	Cosine without IOI	COSnIOI	-1	ü		13	0.380813	0.366402	0.373536	0.748303	0.726007	1.03875	1.01915	0.302138	0.302138	0.549644	0.412349	0.697862	0.683201	0.74887	0.421092	0.597869	0.720686	0.660127	0.778189	0.588213	0.411787	0.221811	0.279314	0.339873	3.12	0.999338	1942.94	2116.64	820.3	603.34	1171.6
PCC	Standard Pearson without IOI	PCCnIOI	65535	ü	ü	39	0.389394	0.3765	0.382891	0.750824	0.725439	1.06134	1.03014	0.297936	0.297936	0.5458	0.418101	0.702064	0.68825	0.751287	0.417996	0.601102	0.725765	0.663629	0.777734	0.598766	0.401234	0.222266	0.274235	0.336371	3.12	0.999338	1970.04	2115.42	799.28	604.56	1192.62
COS	Cosine without IOI	COSnIOI	65535	ü	ü	13	0.375346	0.349577	0.362231	0.750701	0.738881	1.08168	1.03998	0.306099	0.306099	0.553238	0.410855	0.693901	0.674789	0.752062	0.428499	0.600932	0.708335	0.667011	0.798515	0.551062	0.448938	0.201485	0.291665	0.332989	3.12	0.999338	1935.9	2171.94	894.26	548.04	1097.64
COS	Cosine without IOI	COSnIOI	-1	ü		48	0.3818	0.368231	0.374953	0.748278	0.721831	1.02772	1.01372	0.301595	0.301595	0.549141	0.41347	0.698405	0.684116	0.748793	0.420334	0.597847	0.721926	0.659874	0.776688	0.591543	0.408457	0.223312	0.278074	0.340126	3.12	0.999338	1948.22	2112.58	813.68	607.4	1178.22
PCC	Standard Pearson without IOI	PCCnIOI	65535	ü	ü	40	0.389209	0.376495	0.382797	0.750664	0.725783	1.062	1.03046	0.298013	0.298013	0.545872	0.417846	0.701987	0.688247	0.751118	0.41793	0.600894	0.725875	0.663333	0.777267	0.599228	0.400772	0.222733	0.274125	0.336667	3.12	0.999338	1968.84	2114.14	798.36	605.84	1193.54
PCC	Standard Pearson without IOI	PCCnIOI	65535	ü	ü	41	0.389319	0.376727	0.382969	0.750653	0.725783	1.0626	1.03075	0.297949	0.297949	0.545813	0.417901	0.702051	0.688363	0.7511	0.417823	0.60088	0.726048	0.663271	0.777047	0.59968	0.40032	0.222953	0.273952	0.336729	3.12	0.999338	1969.1	2113.54	797.46	606.44	1194.44
PCC	Standard Pearson without IOI	PCCnIOI	65535	ü	ü	42	0.389134	0.376508	0.382767	0.750599	0.726004	1.06336	1.03112	0.298038	0.298038	0.54589	0.417812	0.701962	0.688254	0.751047	0.417892	0.600815	0.725933	0.663201	0.777059	0.599448	0.400552	0.222941	0.274067	0.336799	3.12	0.999338	1968.68	2113.58	797.92	606.4	1193.98
COS	Cosine without IOI	COSnIOI	-1	ü		50	0.381559	0.368144	0.37479	0.748123	0.722115	1.02821	1.01396	0.301697	0.301697	0.549234	0.413279	0.698303	0.684072	0.74863	0.420303	0.597647	0.721974	0.659586	0.776302	0.591843	0.408157	0.223698	0.278026	0.340414	3.12	0.999338	1947.32	2111.52	813.1	608.46	1178.8
COS	Cosine without IOI	COSnIOI	65535	ü	ü	16	0.376198	0.351745	0.363764	0.750596	0.735299	1.0719	1.03527	0.305496	0.305496	0.552692	0.411819	0.694504	0.675872	0.751855	0.427656	0.600797	0.709753	0.666445	0.796479	0.555265	0.444735	0.203521	0.290247	0.333555	3.12	0.999338	1940.44	2166.4	885.88	553.58	1106.02
COS	Cosine without IOI	COSnIOI	-1	ü		51	0.3814	0.368063	0.374671	0.748013	0.722213	1.0283	1.014	0.301769	0.301769	0.549298	0.413164	0.698231	0.684032	0.748515	0.420291	0.59751	0.721993	0.659407	0.776042	0.592021	0.407979	0.223958	0.278007	0.340593	3.12	0.999338	1946.78	2110.82	812.74	609.16	1179.16
COS	Cosine without IOI	COSnIOI	-1	ü		52	0.38136	0.368091	0.374666	0.747971	0.722217	1.02826	1.01398	0.301782	0.301782	0.549312	0.413151	0.698218	0.684046	0.74847	0.420263	0.597454	0.72204	0.65932	0.775897	0.592194	0.407806	0.224103	0.27796	0.34068	3.12	0.999338	1946.72	2110.42	812.4	609.56	1179.5
COS	Cosine without IOI	COSnIOI	-1	ü		53	0.381343	0.368094	0.374658	0.747949	0.722353	1.02828	1.01399	0.30179	0.30179	0.549317	0.412956	0.69821	0.684047	0.748446	0.420253	0.597428	0.722057	0.659287	0.775832	0.592262	0.407738	0.224168	0.277943	0.340713	3.12	0.999338	1945.8	2110.24	812.26	609.74	1179.64
COS	Cosine without IOI	COSnIOI	65535	ü	ü	34	0.380012	0.359636	0.369682	0.750536	0.728032	1.05101	1.02514	0.303153	0.303153	0.550562	0.413648	0.696847	0.679818	0.751492	0.424647	0.600725	0.714787	0.665225	0.790112	0.569524	0.430476	0.209888	0.285213	0.334775	3.12	0.999338	1949.06	2149.06	857.5	570.92	1134.4
PCC	Standard Pearson without IOI	PCCnIOI	65535	ü	ü	43	0.388907	0.376337	0.382569	0.750481	0.726284	1.0642	1.03152	0.298144	0.298144	0.545987	0.417701	0.701856	0.688169	0.750927	0.417911	0.600664	0.7259	0.663008	0.776846	0.599491	0.400509	0.223154	0.2741	0.336992	3.12	0.999338	1968.16	2113	797.84	606.98	1194.06
COS	Cosine without IOI	COSnIOI	-1	ü		54	0.381222	0.368064	0.374584	0.747863	0.722633	1.0288	1.01425	0.301837	0.301837	0.549358	0.412791	0.698163	0.684032	0.748355	0.42023	0.59732	0.722094	0.659129	0.775601	0.592463	0.407537	0.224399	0.277906	0.340871	3.12	0.999338	1945.02	2109.62	811.86	610.36	1180.04
PCC	Standard Pearson without IOI	PCCnIOI	65535	ü	ü	44	0.388826	0.376358	0.38254	0.750406	0.726148	1.06462	1.03173	0.298174	0.298174	0.546014	0.417981	0.701826	0.688179	0.750847	0.417869	0.600568	0.725969	0.662857	0.776607	0.599751	0.400249	0.223393	0.274031	0.337143	3.12	0.999338	1969.48	2112.34	797.32	607.64	1194.58
COS	Cosine without IOI	COSnIOI	-1	ü		55	0.380958	0.367916	0.374379	0.747707	0.722726	1.02873	1.01422	0.301952	0.301952	0.549464	0.412676	0.698048	0.683958	0.748193	0.420225	0.597121	0.722102	0.658856	0.775254	0.592662	0.407338	0.224746	0.277898	0.341144	3.12	0.999338	1944.48	2108.68	811.46	611.3	1180.44
COS	Cosine without IOI	COSnIOI	65535	ü	ü	12	0.373976	0.347771	0.360634	0.750364	0.740558	1.08621	1.04215	0.306803	0.306803	0.553871	0.410129	0.693197	0.673886	0.751764	0.429034	0.600502	0.707428	0.666548	0.798906	0.548865	0.451135	0.201094	0.292572	0.333452	3.12	0.999338	1932.48	2173	898.64	546.98	1093.26
COS	Cosine without IOI	COSnIOI	65535	ü	ü	35	0.37966	0.3595	0.369441	0.750322	0.728282	1.05101	1.02514	0.303293	0.303293	0.550688	0.413271	0.696707	0.67975	0.751264	0.42462	0.600453	0.714833	0.664827	0.789582	0.569918	0.430082	0.210418	0.285167	0.335173	3.12	0.999338	1947.28	2147.62	856.72	572.36	1135.18
COS	Cosine without IOI	COSnIOI	-1	ü		12	0.379085	0.364904	0.371925	0.747548	0.727731	1.04209	1.02079	0.302936	0.302936	0.550369	0.411288	0.697064	0.682452	0.748104	0.421391	0.596907	0.720193	0.658891	0.777129	0.587774	0.412226	0.222871	0.279807	0.341109	3.12	0.999338	1937.94	2113.76	821.18	606.22	1170.72
COS	Cosine without IOI	COSnIOI	-1	ü		58	0.380725	0.367861	0.374237	0.74753	0.722871	1.0289	1.0143	0.302049	0.302049	0.549553	0.412591	0.697951	0.683931	0.748006	0.420175	0.596895	0.722182	0.658543	0.77478	0.593081	0.406919	0.22522	0.277818	0.341457	3.12	0.999338	1944.08	2107.4	810.64	612.58	1181.26
PCC	Standard Pearson without IOI	PCCnIOI	65535	ü	ü	46	0.388678	0.376298	0.382437	0.750307	0.726365	1.06495	1.03189	0.298238	0.298238	0.546074	0.417824	0.701762	0.688149	0.750743	0.417851	0.600438	0.726001	0.662677	0.776359	0.599939	0.400061	0.223641	0.273999	0.337323	3.12	0.999338	1968.74	2111.66	796.94	608.32	1194.96
COS	Cosine without IOI	COSnIOI	-1	ü		57	0.380622	0.367744	0.374126	0.747498	0.722782	1.02891	1.0143	0.3021	0.3021	0.549599	0.412714	0.6979	0.683872	0.747975	0.420209	0.596854	0.722127	0.658495	0.774776	0.592968	0.407032	0.225224	0.277873	0.341505	3.12	0.999338	1944.66	2107.38	810.86	612.6	1181.04
PCC	Standard Pearson without IOI	PCCnIOI	65535	ü	ü	45	0.388635	0.376238	0.382385	0.750298	0.726471	1.06523	1.03203	0.298259	0.298259	0.546094	0.417773	0.701741	0.688119	0.750736	0.417873	0.600428	0.725966	0.662669	0.77638	0.599858	0.400142	0.22362	0.274034	0.337331	3.12	0.999338	1968.5	2111.72	797.1	608.26	1194.8
COS	Cosine without IOI	COSnIOI	-1	ü		56	0.380341	0.367371	0.373798	0.747435	0.723053	1.02944	1.01457	0.30224	0.30224	0.549727	0.41254	0.69776	0.683685	0.747917	0.420335	0.596773	0.721921	0.658419	0.774879	0.592492	0.407508	0.225121	0.278079	0.341581	3.12	0.999338	1943.84	2107.66	811.8	612.32	1180.1
COS	Cosine without IOI	COSnIOI	65535	ü	ü	36	0.37973	0.359836	0.369648	0.75025	0.727811	1.04998	1.02463	0.303225	0.303225	0.550628	0.413546	0.696775	0.679918	0.751174	0.424462	0.600359	0.715095	0.664635	0.789102	0.570734	0.429266	0.210898	0.284905	0.335365	3.12	0.999338	1948.58	2146.32	855.1	573.66	1136.8
PCC	Standard Pearson without IOI	PCCnIOI	65535	ü	ü	48	0.388609	0.376346	0.382427	0.750216	0.726449	1.0659	1.03235	0.298263	0.298263	0.546097	0.418054	0.701737	0.688173	0.750646	0.417793	0.600323	0.726097	0.662513	0.776056	0.60029	0.39971	0.223944	0.273903	0.337487	3.12	0.999338	1969.82	2110.84	796.24	609.14	1195.66
PCC	Standard Pearson without IOI	PCCnIOI	65535	ü	ü	47	0.388525	0.376257	0.382341	0.750183	0.726445	1.06532	1.03207	0.298306	0.298306	0.546134	0.417846	0.701694	0.688129	0.750614	0.417815	0.600283	0.726057	0.662469	0.776033	0.600224	0.399776	0.223967	0.273943	0.337531	3.12	0.999338	1968.84	2110.78	796.38	609.2	1195.52
COS	Cosine without IOI	COSnIOI	65535	ü	ü	39	0.380058	0.360785	0.370294	0.750128	0.727574	1.04886	1.02409	0.302996	0.302996	0.550419	0.413406	0.697004	0.680392	0.751008	0.424046	0.600204	0.715785	0.664273	0.787995	0.572789	0.427211	0.212005	0.284215	0.335727	3.12	0.999338	1947.92	2143.32	851.02	576.66	1140.88
COS	Cosine without IOI	COSnIOI	-1	ü		59	0.379935	0.367195	0.373509	0.747167	0.723189	1.02939	1.01454	0.302414	0.302414	0.549886	0.412379	0.697586	0.683597	0.747636	0.420297	0.596432	0.721983	0.657952	0.774228	0.592967	0.407033	0.225772	0.278017	0.342048	3.12	0.999338	1943.08	2105.9	810.86	614.08	1181.04
COS	Cosine without IOI	COSnIOI	65535	ü	ü	38	0.379784	0.360279	0.369901	0.750121	0.72782	1.04942	1.02437	0.303153	0.303153	0.550563	0.413304	0.696847	0.68014	0.751018	0.424238	0.600192	0.715467	0.664317	0.788367	0.571912	0.428088	0.211633	0.284533	0.335683	3.12	0.999338	1947.44	2144.32	852.76	575.66	1139.14
COS	Cosine without IOI	COSnIOI	65535	ü	ü	37	0.379537	0.359811	0.369541	0.750111	0.728049	1.05017	1.02473	0.303297	0.303297	0.550693	0.413279	0.696703	0.679906	0.751024	0.424418	0.600182	0.715166	0.66437	0.788709	0.571102	0.428898	0.211291	0.284834	0.33563	3.12	0.999338	1947.32	2145.26	854.38	574.72	1137.52
PCC	Standard Pearson without IOI	PCCnIOI	65535	ü	ü	49	0.388305	0.376069	0.382136	0.750093	0.726704	1.06697	1.03287	0.298408	0.298408	0.54623	0.417994	0.701592	0.688034	0.750523	0.417855	0.600164	0.725994	0.662312	0.775913	0.600156	0.399844	0.224087	0.274006	0.337688	3.12	0.999338	1969.54	2110.44	796.52	609.54	1195.38
COS	Cosine without IOI	COSnIOI	65535	ü	ü	41	0.380243	0.361301	0.370649	0.750066	0.727395	1.04797	1.02366	0.302868	0.302868	0.550306	0.413266	0.697132	0.680651	0.750924	0.423821	0.600123	0.716163	0.66408	0.787402	0.573899	0.426101	0.212598	0.283837	0.33592	3.12	0.999338	1947.26	2141.7	848.8	578.28	1143.1
COS	Cosine without IOI	COSnIOI	-1	ü		60	0.379592	0.366933	0.373207	0.746997	0.723465	1.02975	1.01472	0.302571	0.302571	0.550028	0.412167	0.697429	0.683466	0.747462	0.420332	0.596215	0.721926	0.657665	0.773929	0.593003	0.406997	0.226071	0.278074	0.342335	3.12	0.999338	1942.08	2105.08	810.78	614.9	1181.12
COS	Cosine without IOI	COSnIOI	-1	ü		61	0.379568	0.367053	0.373256	0.746916	0.723414	1.02964	1.01466	0.302571	0.302571	0.550029	0.412213	0.697429	0.683526	0.747373	0.420249	0.596111	0.722063	0.657505	0.773597	0.593456	0.406544	0.226403	0.277937	0.342495	3.12	0.999338	1942.3	2104.18	809.88	615.8	1182.02
PCC	Standard Pearson without IOI	PCCnIOI	65535	ü	ü	8	0.385482	0.371134	0.378239	0.750039	0.733868	1.07445	1.0365	0.299906	0.299906	0.547603	0.41358	0.700094	0.685567	0.75059	0.419874	0.600091	0.722696	0.662787	0.779588	0.591546	0.408454	0.220412	0.277304	0.337213	3.12	0.999338	1948.74	2120.46	813.6	599.52	1178.3
COS	Cosine without IOI	COSnIOI	65535	ü	ü	40	0.379929	0.360873	0.370276	0.749998	0.727514	1.04874	1.02403	0.30303	0.30303	0.55045	0.413453	0.69697	0.680437	0.750864	0.42396	0.600037	0.715929	0.663999	0.787533	0.57334	0.42666	0.212467	0.284071	0.336001	3.12	0.999338	1948.14	2142.06	849.92	577.92	1141.98
COS	Cosine without IOI	COSnIOI	65535	ü	ü	42	0.380048	0.361189	0.370496	0.749961	0.727196	1.04753	1.02344	0.302949	0.302949	0.550379	0.413338	0.697051	0.680594	0.750812	0.423824	0.599988	0.716159	0.663889	0.787172	0.574017	0.425983	0.212828	0.283841	0.336111	3.12	0.999338	1947.6	2141.08	848.56	578.9	1143.34
PCC	Standard Pearson without IOI	PCCnIOI	65535	ü	ü	50	0.3879	0.375702	0.381751	0.749918	0.727095	1.06814	1.03343	0.298594	0.298594	0.546401	0.417841	0.701406	0.687851	0.750346	0.417933	0.599941	0.725866	0.662034	0.775681	0.600022	0.399978	0.224319	0.274134	0.337966	3.12	0.999338	1968.82	2109.82	796.78	610.16	1195.12
COS	Cosine without IOI	COSnIOI	-1	ü		11	0.377054	0.363168	0.370045	0.746658	0.729832	1.04748	1.02342	0.303862	0.303862	0.55121	0.410562	0.696138	0.681584	0.747198	0.421726	0.595774	0.719639	0.657415	0.77584	0.587329	0.412671	0.22416	0.280361	0.342585	3.12	0.999338	1934.52	2110.28	822.06	609.7	1169.84
COS	Cosine without IOI	COSnIOI	-1	ü		65	0.379158	0.36687	0.372962	0.746651	0.723889	1.03012	1.0149	0.30275	0.30275	0.550192	0.411755	0.69725	0.683435	0.747096	0.420213	0.595771	0.722122	0.657036	0.77296	0.59391	0.40609	0.22704	0.277878	0.342964	3.12	0.999338	1940.14	2102.44	808.98	617.54	1182.92
PCC	Standard Pearson without IOI	PCCnIOI	65535	ü	ü	51	0.387933	0.375799	0.381816	0.749902	0.727252	1.06886	1.03378	0.298573	0.298573	0.546383	0.417808	0.701427	0.687899	0.750326	0.417884	0.599917	0.725949	0.661984	0.775551	0.600248	0.399752	0.224449	0.274051	0.338016	3.12	0.999338	1968.66	2109.46	796.32	610.52	1195.58
COS	Cosine without IOI	COSnIOI	65535	ü	ü	43	0.379805	0.361105	0.370335	0.749811	0.727056	1.04726	1.0233	0.303042	0.303042	0.550461	0.413453	0.696958	0.680552	0.750652	0.423797	0.599799	0.716202	0.663603	0.786787	0.574317	0.425683	0.213213	0.283798	0.336397	3.12	0.999338	1948.14	2140.04	847.96	579.94	1143.94
COS	Cosine without IOI	COSnIOI	-1	ü		62	0.378921	0.366525	0.37267	0.746613	0.723813	1.03026	1.01497	0.302873	0.302873	0.550302	0.411912	0.697127	0.683262	0.747065	0.420337	0.595725	0.721914	0.657007	0.773122	0.593403	0.406597	0.226878	0.278086	0.342993	3.12	0.999338	1940.88	2102.88	810	617.1	1181.9
COS	Cosine without IOI	COSnIOI	-1	ü		66	0.379171	0.366964	0.373016	0.746606	0.72383	1.03012	1.0149	0.302741	0.302741	0.550182	0.411865	0.697259	0.683482	0.747047	0.420156	0.595717	0.722214	0.656957	0.772762	0.594203	0.405797	0.227238	0.277786	0.343043	3.12	0.999338	1940.66	2101.9	808.4	618.08	1183.5
COS	Cosine without IOI	COSnIOI	65535	ü	ü	47	0.380246	0.362066	0.371043	0.749771	0.726589	1.04565	1.02252	0.302771	0.302771	0.550218	0.413423	0.697229	0.681033	0.750576	0.423406	0.599744	0.716857	0.663389	0.785908	0.576159	0.423841	0.214092	0.283143	0.336611	3.12	0.999338	1948	2137.64	844.28	582.34	1147.62
COS	Cosine without IOI	COSnIOI	65535	ü	ü	45	0.379958	0.361534	0.37063	0.749762	0.727022	1.0466	1.02298	0.302936	0.302936	0.550367	0.413258	0.697064	0.680767	0.750584	0.42361	0.599734	0.716514	0.663445	0.786302	0.575232	0.424768	0.213698	0.283486	0.336555	3.12	0.999338	1947.22	2138.72	846.14	581.26	1145.76
COS	Cosine without IOI	COSnIOI	-1	ü		64	0.378881	0.366543	0.37266	0.746571	0.723809	1.03023	1.01495	0.302885	0.302885	0.550314	0.411925	0.697115	0.683271	0.74702	0.420313	0.595671	0.721955	0.656926	0.772982	0.593561	0.406439	0.227018	0.278045	0.343074	3.12	0.999338	1940.94	2102.5	809.68	617.48	1182.22
COS	Cosine without IOI	COSnIOI	65535	ü	ü	44	0.379831	0.361335	0.370466	0.749741	0.727081	1.04679	1.02308	0.303004	0.303004	0.550429	0.413236	0.696996	0.680668	0.750568	0.423682	0.599708	0.716396	0.663435	0.786397	0.574939	0.425061	0.213603	0.283604	0.336565	3.12	0.999338	1947.12	2138.98	846.72	581	1145.18
COS	Cosine without IOI	COSnIOI	-1	ü		63	0.378714	0.366358	0.372483	0.746512	0.724025	1.03048	1.01508	0.302966	0.302966	0.550386	0.411738	0.697034	0.683179	0.746961	0.420364	0.595597	0.721871	0.656842	0.77295	0.593408	0.406592	0.22705	0.278129	0.343158	3.12	0.999338	1940.06	2102.42	809.98	617.56	1181.92
COS	Cosine without IOI	COSnIOI	-1	ü		67	0.378993	0.366914	0.372903	0.746475	0.723885	1.03008	1.01488	0.302813	0.302813	0.55025	0.411755	0.697187	0.683457	0.746907	0.420123	0.595547	0.722273	0.656719	0.772408	0.594507	0.405493	0.227592	0.277727	0.343281	3.12	0.999338	1940.14	2100.94	807.78	619.04	1184.12
COS	Cosine without IOI	COSnIOI	65535	ü	ü	46	0.380011	0.361688	0.370735	0.74974	0.727043	1.04674	1.02305	0.302898	0.302898	0.550333	0.413194	0.697102	0.680844	0.750555	0.423542	0.599705	0.716631	0.66338	0.786112	0.575576	0.424424	0.213888	0.283369	0.33662	3.12	0.999338	1946.92	2138.2	845.44	581.78	1146.46
COS	Cosine without IOI	COSnIOI	65535	ü	ü	50	0.380512	0.362657	0.371475	0.749725	0.726483	1.04477	1.02208	0.302614	0.302614	0.550072	0.413321	0.697386	0.681329	0.750508	0.423158	0.599689	0.717266	0.663245	0.785318	0.577339	0.422661	0.214682	0.282734	0.336755	3.12	0.999338	1947.52	2136.04	841.94	583.94	1149.96
PCC	Standard Pearson without IOI	PCCnIOI	65535	ü	ü	52	0.387487	0.375413	0.381401	0.749699	0.727553	1.06974	1.03421	0.298781	0.298781	0.546574	0.417684	0.701219	0.687707	0.750121	0.41796	0.599658	0.725827	0.66166	0.775257	0.600156	0.399844	0.224743	0.274173	0.33834	3.12	0.999338	1968.08	2108.66	796.5	611.32	1195.4
PCC	Standard Pearson without IOI	PCCnIOI	65535	ü	ü	53	0.387568	0.375569	0.38152	0.749691	0.727617	1.07	1.03434	0.298739	0.298739	0.546536	0.417706	0.701261	0.687784	0.750108	0.417892	0.599646	0.725939	0.661629	0.775111	0.600457	0.399543	0.224889	0.274061	0.338371	3.12	0.999338	1968.18	2108.26	795.9	611.72	1196
COS	Cosine without IOI	COSnIOI	-1	ü		68	0.378619	0.366573	0.372546	0.746313	0.723868	1.03004	1.01486	0.302991	0.302991	0.550412	0.411755	0.697009	0.683286	0.746745	0.420196	0.595342	0.722152	0.656467	0.772204	0.594369	0.405631	0.227796	0.277848	0.343533	3.12	0.999338	1940.14	2100.38	808.06	619.6	1183.84
COS	Cosine without IOI	COSnIOI	-1	ü		10	0.376346	0.362696	0.369456	0.746278	0.732052	1.05287	1.02605	0.304176	0.304176	0.551494	0.409722	0.695824	0.681348	0.746805	0.421755	0.595288	0.719595	0.656752	0.775072	0.587623	0.412377	0.224928	0.280405	0.343248	3.12	0.999338	1930.56	2108.18	821.44	611.8	1170.46
COS	Cosine without IOI	COSnIOI	65535	ü	ü	49	0.380179	0.362212	0.371085	0.749657	0.726708	1.04551	1.02245	0.302779	0.302779	0.550224	0.413291	0.697221	0.681106	0.750449	0.423303	0.5996	0.717025	0.663154	0.785457	0.576755	0.423245	0.214543	0.282975	0.336846	3.12	0.999338	1947.38	2136.42	843.1	583.56	1148.8
COS	Cosine without IOI	COSnIOI	65535	ü	ü	48	0.380008	0.361975	0.37088	0.749622	0.726814	1.04585	1.02262	0.302868	0.302868	0.550307	0.413224	0.697132	0.680987	0.750419	0.423383	0.599553	0.716893	0.663115	0.78554	0.576435	0.423565	0.21446	0.283107	0.336885	3.12	0.999338	1947.06	2136.64	843.74	583.34	1148.16
COS	Cosine without IOI	COSnIOI	-1	ü		69	0.378195	0.366206	0.372151	0.74612	0.724259	1.03059	1.01513	0.303191	0.303191	0.550592	0.41142	0.696809	0.683103	0.74655	0.420265	0.595097	0.722037	0.656159	0.771925	0.594282	0.405718	0.228075	0.277963	0.343841	3.12	0.999338	1938.56	2099.62	808.24	620.36	1183.66
COS	Cosine without IOI	COSnIOI	65535	ü	ü	11	0.371355	0.344894	0.357877	0.749536	0.743584	1.09313	1.04547	0.30806	0.30806	0.555007	0.408576	0.69194	0.672447	0.750968	0.42978	0.59944	0.706164	0.665191	0.798643	0.54625	0.45375	0.201357	0.293836	0.334809	3.12	0.999338	1925.16	2172.3	903.86	547.68	1088.04
PCC	Standard Pearson without IOI	PCCnIOI	65535	ü	ü	54	0.387085	0.375091	0.381039	0.749505	0.727973	1.0714	1.03502	0.298968	0.298968	0.546746	0.417731	0.701032	0.687545	0.749923	0.418015	0.599409	0.725739	0.661346	0.774942	0.600149	0.399851	0.225058	0.274261	0.338654	3.12	0.999338	1968.3	2107.8	796.52	612.18	1195.38
PCC	Standard Pearson without IOI	PCCnIOI	65535	ü	ü	61	0.386936	0.374932	0.380885	0.74946	0.728436	1.07451	1.03651	0.299036	0.299036	0.54681	0.418105	0.700964	0.687466	0.749878	0.418059	0.599349	0.725667	0.661269	0.774926	0.600006	0.399994	0.225074	0.274333	0.338731	3.12	0.999338	1970.06	2107.76	796.8	612.22	1195.1
COS	Cosine without IOI	COSnIOI	-1	ü		70	0.377907	0.365908	0.371858	0.746018	0.724424	1.03065	1.01516	0.303327	0.303327	0.550716	0.41122	0.696673	0.682954	0.746449	0.420346	0.594967	0.721904	0.656003	0.771857	0.594051	0.405949	0.228143	0.278096	0.343997	3.12	0.999338	1937.62	2099.44	808.7	620.54	1183.2
PCC	Standard Pearson without IOI	PCCnIOI	65535	ü	ü	55	0.386935	0.374947	0.380893	0.74945	0.728228	1.07185	1.03523	0.299036	0.299036	0.546809	0.41754	0.700964	0.687474	0.749867	0.418049	0.599337	0.725685	0.66125	0.774884	0.600063	0.399937	0.225116	0.274315	0.33875	3.12	0.999338	1967.4	2107.64	796.68	612.34	1195.22
COS	Cosine without IOI	COSnIOI	65535	ü	ü	51	0.379934	0.362233	0.370976	0.749449	0.726652	1.04478	1.02209	0.302868	0.302868	0.550305	0.413105	0.697132	0.681116	0.750224	0.423217	0.599335	0.717171	0.662763	0.784827	0.577406	0.422594	0.215173	0.282829	0.337237	3.12	0.999338	1946.5	2134.7	841.8	585.28	1150.1
COS	Cosine without IOI	COSnIOI	-1	ü		71	0.377607	0.365705	0.371607	0.745855	0.724696	1.03107	1.01537	0.303462	0.303462	0.55084	0.411046	0.696538	0.682853	0.746281	0.420361	0.594759	0.72188	0.655727	0.771535	0.594171	0.405829	0.228465	0.27812	0.344273	3.12	0.999338	1936.8	2098.56	808.46	621.42	1183.44
PCC	Standard Pearson without IOI	PCCnIOI	65535	ü	ü	57	0.386809	0.37481	0.380761	0.749412	0.72847	1.07318	1.03587	0.299095	0.299095	0.546862	0.417595	0.700905	0.687405	0.74983	0.418089	0.59929	0.725615	0.661194	0.774881	0.599929	0.400071	0.225119	0.274385	0.338806	3.12	0.999338	1967.66	2107.64	796.96	612.34	1194.94
PCC	Standard Pearson without IOI	PCCnIOI	65535	ü	ü	56	0.386845	0.374876	0.380812	0.749404	0.72844	1.07263	1.0356	0.299078	0.299078	0.546847	0.417536	0.700922	0.687438	0.749821	0.418058	0.59928	0.725667	0.661179	0.774808	0.600068	0.399932	0.225192	0.274333	0.338821	3.12	0.999338	1967.38	2107.44	796.68	612.54	1195.22
COS	Cosine without IOI	COSnIOI	-1	ü		72	0.377648	0.365838	0.371695	0.745817	0.72462	1.03104	1.01535	0.303441	0.303441	0.55082	0.411118	0.696559	0.682919	0.746239	0.420292	0.594711	0.721991	0.655656	0.771329	0.594509	0.405491	0.228671	0.278009	0.344344	3.12	0.999338	1937.14	2098	807.8	621.98	1184.1
PCC	Standard Pearson without IOI	PCCnIOI	65535	ü	ü	60	0.386737	0.374743	0.380691	0.749382	0.728597	1.07457	1.03654	0.299129	0.299129	0.546896	0.417876	0.700871	0.687371	0.7498	0.418106	0.599248	0.725591	0.661146	0.774845	0.599898	0.400102	0.225155	0.274409	0.338854	3.12	0.999338	1968.98	2107.54	797.02	612.44	1194.88
COS	Cosine without IOI	COSnIOI	-1	ü		73	0.377665	0.365893	0.371731	0.745801	0.724726	1.03127	1.01546	0.303429	0.303429	0.550806	0.411021	0.696571	0.682947	0.746219	0.420262	0.594694	0.722039	0.655626	0.771237	0.594656	0.405344	0.228763	0.277961	0.344374	3.12	0.999338	1936.68	2097.76	807.5	622.22	1184.4
PCC	Standard Pearson without IOI	PCCnIOI	65535	ü	ü	58	0.386686	0.374667	0.380628	0.749376	0.728423	1.07328	1.03592	0.299155	0.299155	0.546917	0.417689	0.700845	0.687334	0.749795	0.418133	0.599242	0.725546	0.66114	0.774883	0.599784	0.400216	0.225117	0.274454	0.33886	3.12	0.999338	1968.1	2107.64	797.24	612.34	1194.66
COS	Cosine without IOI	COSnIOI	-1	ü		74	0.377194	0.365439	0.371269	0.745614	0.724946	1.03169	1.01567	0.303649	0.303649	0.551007	0.410897	0.696351	0.68272	0.746031	0.420371	0.594456	0.721861	0.655333	0.771037	0.594402	0.405598	0.228963	0.278139	0.344667	3.12	0.999338	1936.1	2097.22	808	622.76	1183.9
COS	Cosine without IOI	COSnIOI	-1	ü		75	0.376799	0.365072	0.370888	0.745441	0.725091	1.03186	1.01575	0.30384	0.30384	0.55118	0.41074	0.69616	0.682536	0.745858	0.420452	0.594237	0.721727	0.655072	0.770825	0.594246	0.405754	0.229175	0.278273	0.344928	3.12	0.999338	1935.36	2096.64	808.32	623.34	1183.58
COS	Cosine without IOI	COSnIOI	-1	ü		76	0.37678	0.365112	0.370899	0.745405	0.72501	1.03179	1.01572	0.303845	0.303845	0.551184	0.4108	0.696155	0.682556	0.745819	0.42042	0.59419	0.72178	0.655	0.770686	0.594425	0.405575	0.229314	0.27822	0.345	3.12	0.999338	1935.64	2096.26	807.96	623.72	1183.94
COS	Cosine without IOI	COSnIOI	-1	ü		9	0.374348	0.36103	0.367627	0.745366	0.734229	1.05746	1.02829	0.305101	0.305101	0.55233	0.408469	0.694899	0.680515	0.74588	0.422054	0.594131	0.71909	0.655258	0.773698	0.587332	0.412668	0.226302	0.28091	0.344742	3.12	0.999338	1924.66	2104.44	822.06	615.54	1169.84
COS	Cosine without IOI	COSnIOI	-1	ü		77	0.376603	0.36491	0.370709	0.74535	0.725193	1.0321	1.01587	0.303929	0.303929	0.551261	0.410706	0.696071	0.682455	0.745765	0.420481	0.594121	0.721682	0.654921	0.77068	0.594231	0.405769	0.22932	0.278318	0.345079	3.12	0.999338	1935.2	2096.24	808.34	623.74	1183.56
COS	Cosine without IOI	COSnIOI	-1	ü		78	0.376526	0.364869	0.37065	0.745305	0.72515	1.03226	1.01595	0.303963	0.303963	0.551293	0.410859	0.696037	0.682434	0.745718	0.420478	0.594061	0.721687	0.654838	0.770578	0.594291	0.405709	0.229422	0.278313	0.345162	3.12	0.999338	1935.92	2095.96	808.22	624.02	1183.68
COS	Cosine without IOI	COSnIOI	-1	ü		81	0.376343	0.364797	0.370524	0.745176	0.725545	1.03246	1.01605	0.30404	0.30404	0.551361	0.410384	0.69596	0.682398	0.745582	0.420455	0.593899	0.721727	0.654616	0.770251	0.594546	0.405454	0.229749	0.278273	0.345384	3.12	0.999338	1933.68	2095.08	807.7	624.9	1184.2
COS	Cosine without IOI	COSnIOI	-1	ü		79	0.37622	0.364605	0.370366	0.74517	0.725426	1.03262	1.01612	0.304103	0.304103	0.55142	0.410592	0.695897	0.682303	0.745581	0.420531	0.59389	0.7216	0.65462	0.770385	0.59422	0.40578	0.229615	0.2784	0.34538	3.12	0.999338	1934.66	2095.44	808.36	624.54	1183.54
COS	Cosine without IOI	COSnIOI	-1	ü		80	0.376025	0.364414	0.370173	0.745092	0.725591	1.03291	1.01627	0.304197	0.304197	0.551504	0.410482	0.695803	0.682207	0.745503	0.420577	0.593792	0.721525	0.6545	0.770305	0.594109	0.405891	0.229695	0.278475	0.3455	3.12	0.999338	1934.14	2095.22	808.58	624.76	1183.32
COS	Cosine without IOI	COSnIOI	-1	ü		82	0.376218	0.364747	0.370437	0.74509	0.7256	1.03255	1.0161	0.304095	0.304095	0.551412	0.410316	0.695905	0.682373	0.745493	0.420439	0.593789	0.721753	0.654465	0.77004	0.594707	0.405293	0.22996	0.278247	0.345535	3.12	0.999338	1933.36	2094.5	807.38	625.48	1184.52
COS	Cosine without IOI	COSnIOI	-1	ü		83	0.375821	0.364431	0.370081	0.744894	0.725829	1.03282	1.01623	0.304277	0.304277	0.551578	0.410112	0.695723	0.682215	0.745293	0.420488	0.59354	0.721675	0.654147	0.769709	0.594722	0.405278	0.230291	0.278325	0.345853	3.12	0.999338	1932.4	2093.6	807.34	626.38	1184.56
COS	Cosine without IOI	COSnIOI	-1	ü		84	0.375695	0.364374	0.36999	0.744806	0.725927	1.03324	1.01643	0.304337	0.304337	0.551631	0.410172	0.695663	0.682187	0.745202	0.420475	0.59343	0.721693	0.654002	0.769504	0.59487	0.40513	0.230496	0.278307	0.345998	3.12	0.999338	1932.68	2093.04	807.06	626.94	1184.84
COS	Cosine without IOI	COSnIOI	-1	ü		85	0.375073	0.363864	0.369425	0.744509	0.726211	1.03347	1.01654	0.304625	0.304625	0.551895	0.409866	0.695375	0.681932	0.7449	0.420561	0.59305	0.721554	0.653518	0.769027	0.594837	0.405163	0.230973	0.278446	0.346482	3.12	0.999338	1931.24	2091.74	807.12	628.24	1184.78
COS	Cosine without IOI	COSnIOI	-1	ü		87	0.375002	0.363894	0.369405	0.744422	0.726326	1.03363	1.01663	0.304655	0.304655	0.551919	0.409747	0.695345	0.681947	0.744807	0.420512	0.592942	0.721635	0.653368	0.76875	0.595144	0.404856	0.23125	0.278365	0.346632	3.12	0.999338	1930.68	2090.98	806.5	629	1185.4
COS	Cosine without IOI	COSnIOI	-1	ü		86	0.374882	0.363714	0.369255	0.744412	0.726245	1.03348	1.01655	0.304715	0.304715	0.551974	0.409828	0.695285	0.681857	0.744801	0.420582	0.592928	0.72152	0.653362	0.76886	0.594854	0.405146	0.23114	0.27848	0.346638	3.12	0.999338	1931.06	2091.28	807.08	628.7	1184.82
COS	Cosine without IOI	COSnIOI	-1	ü		88	0.37496	0.363916	0.369395	0.744369	0.726356	1.03383	1.01672	0.304672	0.304672	0.551934	0.409794	0.695328	0.681958	0.744751	0.420482	0.592875	0.721685	0.653275	0.768581	0.595335	0.404665	0.231419	0.278315	0.346725	3.12	0.999338	1930.9	2090.52	806.12	629.46	1185.78
COS	Cosine without IOI	COSnIOI	-1	ü		92	0.374932	0.363974	0.369412	0.744308	0.726614	1.03409	1.01686	0.304681	0.304681	0.551943	0.409514	0.695319	0.681987	0.744685	0.420433	0.592796	0.721766	0.653166	0.768358	0.595616	0.404384	0.231642	0.278234	0.346834	3.12	0.999338	1929.58	2089.92	805.56	630.06	1186.34
COS	Cosine without IOI	COSnIOI	-1	ü		89	0.37479	0.363805	0.369256	0.744275	0.726513	1.03385	1.01673	0.304749	0.304749	0.552004	0.40956	0.695251	0.681903	0.744654	0.420488	0.592755	0.721675	0.653115	0.76839	0.595416	0.404584	0.23161	0.278325	0.346885	3.12	0.999338	1929.8	2090	805.96	629.98	1185.94
COS	Cosine without IOI	COSnIOI	-1	ü		93	0.374831	0.363918	0.369333	0.744244	0.726657	1.03398	1.0168	0.304727	0.304727	0.551985	0.409442	0.695273	0.681959	0.744618	0.420429	0.592716	0.72177	0.653061	0.768217	0.595701	0.404299	0.231783	0.27823	0.346939	3.12	0.999338	1929.24	2089.54	805.4	630.44	1186.5
COS	Cosine without IOI	COSnIOI	-1	ü		91	0.374766	0.363862	0.369273	0.744218	0.726585	1.03396	1.01679	0.304757	0.304757	0.55201	0.409505	0.695243	0.681931	0.744593	0.420441	0.592684	0.721751	0.653015	0.768184	0.595678	0.404322	0.231816	0.278249	0.346985	3.12	0.999338	1929.54	2089.44	805.44	630.54	1186.46
COS	Cosine without IOI	COSnIOI	-1	ü		90	0.374638	0.363674	0.369114	0.744202	0.726619	1.03414	1.01688	0.304821	0.304821	0.552069	0.409548	0.695179	0.681837	0.744579	0.420511	0.592663	0.721636	0.653002	0.768279	0.595395	0.404605	0.231721	0.278364	0.346998	3.12	0.999338	1929.74	2089.7	806	630.28	1185.9
COS	Cosine without IOI	COSnIOI	-1	ü		95	0.374611	0.363825	0.369177	0.744095	0.726886	1.03428	1.01695	0.304825	0.304825	0.552076	0.409212	0.695175	0.681912	0.744464	0.420404	0.592524	0.721813	0.652798	0.767853	0.595972	0.404028	0.232147	0.278187	0.347202	3.12	0.999338	1928.16	2088.54	804.86	631.44	1187.04
COS	Cosine without IOI	COSnIOI	-1	ü		94	0.374565	0.363774	0.369129	0.744079	0.726903	1.0343	1.01696	0.304846	0.304846	0.552094	0.409225	0.695154	0.681887	0.744448	0.420418	0.592505	0.721789	0.652776	0.767844	0.595929	0.404071	0.232156	0.278211	0.347224	3.12	0.999338	1928.22	2088.52	804.94	631.46	1186.96
COS	Cosine without IOI	COSnIOI	-1	ü		97	0.374682	0.363988	0.369296	0.744064	0.726839	1.03405	1.01683	0.304787	0.304787	0.552039	0.409174	0.695213	0.681994	0.744427	0.420325	0.592487	0.721942	0.65274	0.767638	0.596351	0.403649	0.232362	0.278058	0.34726	3.12	0.999338	1927.98	2087.96	804.1	632.02	1187.8
COS	Cosine without IOI	COSnIOI	-1	ü		96	0.374556	0.363798	0.369136	0.744055	0.726941	1.03428	1.01695	0.304851	0.304851	0.552098	0.409119	0.695149	0.681899	0.744423	0.420399	0.592474	0.721821	0.652734	0.767759	0.596039	0.403961	0.232241	0.278179	0.347266	3.12	0.999338	1927.72	2088.28	804.72	631.7	1187.18
COS	Cosine without IOI	COSnIOI	-1	ü		99	0.374581	0.363939	0.36922	0.743994	0.726848	1.03444	1.01702	0.304834	0.304834	0.552081	0.40928	0.695166	0.681969	0.744354	0.420318	0.592399	0.721954	0.652627	0.767476	0.596463	0.403537	0.232524	0.278046	0.347373	3.12	0.999338	1928.48	2087.52	803.88	632.46	1188.02
COS	Cosine without IOI	COSnIOI	-1	ü		98	0.374444	0.363796	0.36908	0.743948	0.726971	1.0345	1.01705	0.304897	0.304897	0.552139	0.409174	0.695103	0.681898	0.744308	0.420356	0.59234	0.721892	0.652552	0.767447	0.596349	0.403651	0.232553	0.278108	0.347448	3.12	0.999338	1927.98	2087.44	804.1	632.54	1187.8
PCC	Standard Pearson without IOI	PCCnIOI	65535	ü	ü	59	0.38664	0.37464	0.380592	0.749348	0.728406	1.07398	1.03625	0.299176	0.299176	0.546937	0.417922	0.700824	0.68732	0.749766	0.418132	0.599206	0.725547	0.661093	0.774823	0.599817	0.400183	0.225177	0.274453	0.338907	3.12	0.999338	1969.2	2107.48	797.18	612.5	1194.72
COS	Cosine without IOI	COSnIOI	-1	ü		100	0.374312	0.363748	0.368991	0.74385	0.726946	1.03458	1.0171	0.304957	0.304957	0.552191	0.409183	0.695043	0.681874	0.744207	0.420335	0.592217	0.721924	0.652388	0.767204	0.596544	0.403456	0.232796	0.278076	0.347612	3.12	0.999338	1928.02	2086.78	803.72	633.2	1188.18
COS	Cosine without IOI	COSnIOI	-1	ü		8	0.370974	0.358228	0.364544	0.743795	0.738189	1.06708	1.03295	0.306659	0.306659	0.55374	0.406576	0.693341	0.679114	0.74428	0.42255	0.592136	0.718277	0.652697	0.771253	0.586975	0.413025	0.228747	0.281723	0.347303	3.12	0.999338	1915.74	2097.78	822.74	622.2	1169.16
PCC	Standard Pearson without IOI	PCCnIOI	65535	ü	ü	62	0.386469	0.374462	0.380417	0.749287	0.728966	1.07561	1.03704	0.299256	0.299256	0.547012	0.417731	0.700744	0.687231	0.749705	0.41818	0.599126	0.72547	0.661	0.774779	0.599683	0.400317	0.225221	0.27453	0.339	3.12	0.999338	1968.3	2107.36	797.44	612.62	1194.46
COS	Cosine without IOI	COSnIOI	-1	ü		7	0.367421	0.355471	0.361395	0.742021	0.743359	1.0802	1.03927	0.308302	0.308302	0.555227	0.404412	0.691698	0.677735	0.742468	0.422948	0.589883	0.717621	0.6498	0.768208	0.587262	0.412738	0.231792	0.282379	0.3502	3.12	0.999338	1905.54	2089.48	822.18	630.5	1169.72
PCC	Standard Pearson without IOI	PCCnIOI	65535	ü	ü	63	0.386367	0.374357	0.380313	0.749255	0.729089	1.07608	1.03727	0.299303	0.299303	0.547054	0.417752	0.700697	0.687178	0.749674	0.418209	0.599085	0.725422	0.660946	0.774764	0.599592	0.400408	0.225236	0.274578	0.339054	3.12	0.999338	1968.4	2107.32	797.62	612.66	1194.28
COS	Cosine without IOI	COSnIOI	-1	ü		6	0.362111	0.35103	0.356526	0.739485	0.749641	1.09428	1.04602	0.310785	0.310785	0.557453	0.401479	0.689215	0.675515	0.739889	0.423728	0.586696	0.71632	0.645791	0.764267	0.586763	0.413237	0.235733	0.28368	0.354209	3.12	0.999338	1891.72	2078.78	823.18	641.2	1168.72
COS	Cosine without IOI	COSnIOI	-1	ü		0	0.367318	0.36053	0.363907	0.738709	0.734009	1.04363	1.02154	0.308221	0.308221	0.555144	0.403384	0.691779	0.680265	0.73889	0.419525	0.58572	0.723259	0.644059	0.754883	0.605647	0.394353	0.245117	0.276741	0.355941	3.12	0.999338	1900.7	2053.26	785.58	666.72	1206.32
PCC	Standard Pearson without IOI	PCCnIOI	65535	ü	ü	64	0.386499	0.374597	0.3805	0.749247	0.729374	1.07697	1.03771	0.299235	0.299235	0.546993	0.417621	0.700765	0.687298	0.749661	0.418107	0.599076	0.725589	0.66091	0.774559	0.600037	0.399963	0.225441	0.274411	0.33909	3.12	0.999338	1967.78	2106.76	796.74	613.22	1195.16
COS	Cosine without IOI	COSnIOI	-1	ü		5	0.355819	0.34602	0.350884	0.736315	0.754875	1.11104	1.05399	0.313734	0.313734	0.560089	0.400791	0.686266	0.67301	0.73666	0.424479	0.582715	0.715058	0.640761	0.75895	0.58707	0.41293	0.24105	0.284942	0.359239	3.12	0.999338	1888.48	2064.3	822.6	655.68	1169.3
PCC	Standard Pearson without IOI	PCCnIOI	65535	ü	ü	65	0.386395	0.374493	0.380396	0.749204	0.729285	1.0768	1.03762	0.299286	0.299286	0.547039	0.417706	0.700714	0.687247	0.749618	0.418133	0.599021	0.725547	0.660848	0.774516	0.599977	0.400023	0.225484	0.274453	0.339152	3.12	0.999338	1968.18	2106.64	796.86	613.34	1195.04
COS	Cosine without IOI	COSnIOI	-1	ü		4	0.344962	0.336011	0.340455	0.731577	0.768398	1.14391	1.06948	0.318892	0.318892	0.564674	0.395035	0.681108	0.668005	0.731889	0.42663	0.576806	0.711458	0.633504	0.752946	0.583065	0.416935	0.247054	0.288542	0.366496	3.12	0.999338	1861.36	2047.98	830.58	672	1161.32
COS	Cosine without IOI	COSnIOI	65535	ü	ü	52	0.379313	0.361703	0.370402	0.74919	0.727073	1.04573	1.02255	0.303148	0.303148	0.550559	0.412922	0.696852	0.680852	0.74996	0.423319	0.599003	0.716998	0.662315	0.784464	0.577239	0.422761	0.215536	0.283002	0.337685	3.12	0.999338	1945.64	2133.72	842.14	586.26	1149.76
COS	Cosine without IOI	COSnIOI	-1	ü		3	0.331538	0.324738	0.328119	0.724704	0.789625	1.19588	1.09351	0.32536	0.32536	0.570378	0.385969	0.67464	0.662369	0.724923	0.428522	0.568306	0.70827	0.623268	0.742015	0.582724	0.417276	0.257985	0.29173	0.376732	3.12	0.999338	1818.64	2018.24	831.32	701.74	1160.58
COS	Cosine without IOI	COSnIOI	-1	ü		2	0.302916	0.298612	0.300755	0.711123	0.82916	1.30975	1.14438	0.339253	0.339253	0.58243	0.374488	0.660747	0.649306	0.711242	0.433832	0.551774	0.699258	0.603658	0.723464	0.575149	0.424851	0.276536	0.300742	0.396342	3.12	0.999338	1764.54	1967.78	846.32	752.2	1145.58
PCC	Standard Pearson without IOI	PCCnIOI	65535	ü	ü	66	0.386272	0.374384	0.38028	0.749155	0.729688	1.07753	1.03797	0.299341	0.299341	0.547088	0.417447	0.700659	0.687192	0.749568	0.418155	0.598959	0.725508	0.660764	0.774454	0.59993	0.40007	0.225546	0.274492	0.339236	3.12	0.999338	1966.96	2106.48	796.96	613.5	1194.94
COS	Cosine without IOI	COSnIOI	-1	ü		1	0.252401	0.250041	0.251218	0.688446	0.933911	1.61377	1.27029	0.363914	0.363914	0.603238	0.341393	0.636086	0.62502	0.688506	0.444637	0.524937	0.680511	0.57189	0.696621	0.55342	0.44658	0.303379	0.319489	0.42811	3.12	0.999338	1608.6	1894.8	889.54	825.18	1102.36
MRC	Median-Based Robust	MRC	65535		ü	27	0.395129	0.384053	0.38955	0.752099	0.720377	1.04157	1.0205	0.295074	0.295074	0.543177	0.4181	0.704926	0.692027	0.752455	0.415346	0.602729	0.730095	0.665033	0.77553	0.608524	0.391476	0.22447	0.269905	0.334967	3.16	0.99933	1970.02	2109.4	779.78	610.56	1212.1
MRC	Median-Based Robust	MRC	65535		ü	28	0.394863	0.38389	0.389336	0.751947	0.720615	1.04239	1.0209	0.295192	0.295192	0.543287	0.418049	0.704808	0.691945	0.752299	0.415343	0.602533	0.730099	0.664765	0.775206	0.608684	0.391316	0.224794	0.269901	0.335235	3.16	0.99933	1969.78	2108.52	779.46	611.44	1212.42
MRC	Median-Based Robust	MRC	65535		ü	26	0.394372	0.383315	0.388803	0.751808	0.720474	1.04248	1.02095	0.295426	0.295426	0.543504	0.41827	0.704574	0.691658	0.752164	0.415532	0.602353	0.729798	0.664574	0.775241	0.608075	0.391925	0.224759	0.270202	0.335426	3.16	0.99933	1970.82	2108.62	780.66	611.34	1211.22
MRC	Median-Based Robust	MRC	65535		ü	30	0.394576	0.383834	0.389167	0.751714	0.72171	1.04642	1.02288	0.295316	0.295316	0.543402	0.417917	0.704684	0.691917	0.752054	0.415271	0.602233	0.730221	0.664355	0.774568	0.609267	0.390733	0.225432	0.269779	0.335645	3.16	0.99933	1969.16	2106.78	778.3	613.18	1213.58
MRC	Median-Based Robust	MRC	65535		ü	24	0.393679	0.382439	0.388016	0.75162	0.720551	1.04201	1.02071	0.295778	0.295778	0.543825	0.418147	0.704222	0.691219	0.751986	0.41583	0.602115	0.72931	0.664368	0.775397	0.607042	0.392958	0.224603	0.27069	0.335632	3.16	0.99933	1970.24	2109.04	782.74	610.92	1209.14
MRC	Median-Based Robust	MRC	65535		ü	25	0.393716	0.3826	0.388117	0.751576	0.720564	1.04211	1.02077	0.295748	0.295748	0.5438	0.418117	0.704252	0.6913	0.751937	0.41574	0.602056	0.729461	0.664255	0.775133	0.607467	0.392533	0.224867	0.270539	0.335745	3.16	0.99933	1970.1	2108.32	781.88	611.64	1210
MRC	Median-Based Robust	MRC	65535		ü	29	0.394116	0.383311	0.388674	0.751565	0.721319	1.04521	1.02228	0.29554	0.29554	0.543607	0.418109	0.70446	0.691656	0.75191	0.415425	0.602045	0.729967	0.664149	0.774543	0.608768	0.391232	0.225457	0.270033	0.335851	3.16	0.99933	1970.06	2106.72	779.3	613.24	1212.58
MRC	Median-Based Robust	MRC	65535		ü	21	0.393109	0.381633	0.387327	0.751548	0.720576	1.04027	1.01987	0.296054	0.296054	0.544082	0.417943	0.703946	0.690816	0.751927	0.416136	0.602018	0.728813	0.664296	0.7758	0.605833	0.394167	0.2242	0.271187	0.335704	3.16	0.99933	1969.28	2110.14	785.14	609.82	1206.74
MRC	Median-Based Robust	MRC	65535		ü	32	0.394106	0.383393	0.388711	0.751504	0.722478	1.04852	1.0239	0.295545	0.295545	0.54361	0.417565	0.704455	0.691697	0.751845	0.415367	0.601968	0.730061	0.664045	0.774311	0.609083	0.390917	0.225689	0.269939	0.335955	3.16	0.99933	1967.5	2106.08	778.68	613.88	1213.2
MRC	Median-Based Robust	MRC	65535		ü	19	0.392355	0.380436	0.386348	0.751476	0.721119	1.04099	1.02023	0.296445	0.296445	0.544438	0.417735	0.703555	0.690218	0.751878	0.41662	0.601929	0.728027	0.664328	0.776534	0.603901	0.396099	0.223466	0.271973	0.335672	3.16	0.99933	1968.3	2112.14	788.98	607.82	1202.9
MRC	Median-Based Robust	MRC	65535		ü	23	0.393129	0.381822	0.387432	0.751462	0.720415	1.04081	1.02013	0.296037	0.296037	0.544067	0.418087	0.703963	0.690911	0.751833	0.41602	0.601907	0.729007	0.664121	0.775401	0.606421	0.393579	0.224599	0.270993	0.335879	3.16	0.99933	1969.96	2109.04	783.96	610.92	1207.92
MRC	Median-Based Robust	MRC	65535		ü	34	0.393951	0.383331	0.388603	0.751394	0.722839	1.05034	1.02478	0.295613	0.295613	0.543672	0.41768	0.704387	0.691666	0.75173	0.415346	0.601828	0.730094	0.663857	0.774036	0.609295	0.390705	0.225964	0.269906	0.336143	3.16	0.99933	1968.04	2105.34	778.26	614.62	1213.62
MRC	Median-Based Robust	MRC	65535		ü	31	0.393744	0.383068	0.388368	0.75136	0.722151	1.04768	1.02349	0.29571	0.29571	0.543764	0.417697	0.70429	0.691534	0.7517	0.415438	0.601779	0.729948	0.663796	0.77413	0.608937	0.391063	0.22587	0.270052	0.336204	3.16	0.99933	1968.12	2105.58	778.96	614.38	1212.92
MRC	Median-Based Robust	MRC	65535		ü	33	0.393793	0.383164	0.388441	0.751339	0.722333	1.04804	1.02367	0.295689	0.295689	0.543742	0.417667	0.704311	0.691582	0.751675	0.415391	0.601756	0.730023	0.66377	0.774002	0.609162	0.390838	0.225998	0.269977	0.33623	3.16	0.99933	1967.98	2105.24	778.52	614.72	1213.36
MRC	Median-Based Robust	MRC	65535		ü	22	0.392752	0.381477	0.387072	0.751302	0.720555	1.04097	1.02021	0.296211	0.296211	0.544229	0.418117	0.703789	0.690738	0.751671	0.416095	0.6017	0.728884	0.663868	0.775196	0.606281	0.393719	0.224804	0.271116	0.336132	3.16	0.99933	1970.1	2108.5	784.24	611.46	1207.64
MRC	Median-Based Robust	MRC	65535		ü	20	0.392035	0.380273	0.386108	0.751279	0.721115	1.04104	1.02025	0.296589	0.296589	0.544572	0.417519	0.703411	0.690136	0.751675	0.416597	0.601673	0.728062	0.663973	0.776082	0.604191	0.395809	0.223918	0.271938	0.336027	3.16	0.99933	1967.28	2110.9	788.42	609.06	1203.46
MRC	Median-Based Robust	MRC	65535		ü	35	0.393486	0.382952	0.388182	0.751175	0.723407	1.05198	1.02558	0.295829	0.295829	0.543868	0.417493	0.704171	0.691476	0.751507	0.415411	0.60155	0.729983	0.663504	0.773696	0.609256	0.390744	0.226304	0.270017	0.336496	3.16	0.99933	1967.16	2104.42	778.36	615.54	1213.52
MRC	Median-Based Robust	MRC	65535		ü	36	0.393243	0.382826	0.387998	0.751022	0.724133	1.05425	1.02669	0.295935	0.295935	0.543965	0.417277	0.704065	0.691413	0.751348	0.415393	0.601354	0.730013	0.663229	0.773336	0.60949	0.39051	0.226664	0.269987	0.336771	3.16	0.99933	1966.14	2103.44	777.88	616.52	1214
MRC	Median-Based Robust	MRC	65535		ü	17	0.391013	0.378992	0.384954	0.751015	0.72252	1.04165	1.02055	0.29709	0.29709	0.545029	0.416415	0.70291	0.689496	0.751425	0.417025	0.601339	0.727365	0.663648	0.776305	0.602687	0.397313	0.223695	0.272635	0.336352	3.16	0.99933	1962.08	2111.52	791.4	608.44	1200.48
MRC	Median-Based Robust	MRC	65535		ü	37	0.393317	0.383015	0.38813	0.75099	0.724265	1.05474	1.02692	0.295893	0.295893	0.543923	0.417221	0.704107	0.691507	0.75131	0.415294	0.601315	0.730169	0.663147	0.773091	0.609923	0.390077	0.226909	0.269831	0.336853	3.16	0.99933	1965.88	2102.78	777.02	617.18	1214.86
MRC	Median-Based Robust	MRC	65535		ü	18	0.391036	0.379214	0.385078	0.750924	0.722257	1.04275	1.02109	0.297064	0.297064	0.545009	0.416988	0.702936	0.689607	0.751324	0.416894	0.60122	0.727582	0.663454	0.775864	0.60335	0.39665	0.224136	0.272418	0.336546	3.16	0.99933	1964.78	2110.32	790.08	609.64	1201.8
MRC	Median-Based Robust	MRC	65535		ü	38	0.392744	0.382453	0.387563	0.750769	0.724901	1.05636	1.0277	0.296164	0.296164	0.544176	0.416865	0.703836	0.691226	0.751089	0.415438	0.60103	0.729935	0.662808	0.772885	0.609568	0.390432	0.227115	0.270065	0.337192	3.16	0.99933	1964.2	2102.22	777.74	617.74	1214.14
MRC	Median-Based Robust	MRC	65535		ü	39	0.39257	0.382341	0.38742	0.750668	0.725335	1.05759	1.02831	0.296241	0.296241	0.544246	0.416644	0.703759	0.69117	0.750985	0.415439	0.6009	0.729935	0.662635	0.772668	0.609672	0.390328	0.227332	0.270065	0.337365	3.16	0.99933	1963.16	2101.64	777.52	618.32	1214.36
MRC	Median-Based Robust	MRC	65535		ü	16	0.390008	0.377923	0.383916	0.750655	0.723344	1.04291	1.02117	0.297574	0.297574	0.545476	0.415893	0.702426	0.688962	0.75107	0.417322	0.600876	0.726886	0.663122	0.776084	0.601839	0.398161	0.223916	0.273114	0.336878	3.16	0.99933	1959.62	2110.92	793.08	609.04	1198.8
MRC	Median-Based Robust	MRC	65535		ü	40	0.39259	0.38246	0.38749	0.750631	0.725351	1.05805	1.02854	0.296224	0.296224	0.54423	0.416665	0.703776	0.69123	0.750944	0.415369	0.600853	0.730048	0.662542	0.772465	0.609995	0.390005	0.227535	0.269952	0.337458	3.16	0.99933	1963.26	2101.08	776.88	618.88	1215
MRC	Median-Based Robust	MRC	65535		ü	41	0.391899	0.381774	0.386802	0.750365	0.726005	1.0597	1.02933	0.296551	0.296551	0.54453	0.416288	0.703449	0.690887	0.750678	0.415541	0.600511	0.729769	0.662131	0.772214	0.60956	0.39044	0.227786	0.270231	0.337869	3.16	0.99933	1961.48	2100.4	777.74	619.56	1214.14
MRC	Median-Based Robust	MRC	65535		ü	42	0.391691	0.381547	0.386584	0.750292	0.726226	1.06002	1.02949	0.296653	0.296653	0.544627	0.416164	0.703347	0.690773	0.750606	0.415607	0.600414	0.729663	0.662028	0.772178	0.609369	0.390631	0.227822	0.270337	0.337972	3.16	0.99933	1960.9	2100.3	778.12	619.66	1213.76
MRC	Median-Based Robust	MRC	65535		ü	15	0.388899	0.37692	0.382861	0.750177	0.72421	1.04437	1.02188	0.298096	0.298096	0.545952	0.415303	0.701904	0.68846	0.750588	0.417532	0.600265	0.726539	0.66236	0.775461	0.60146	0.39854	0.224539	0.273461	0.33764	3.16	0.99933	1956.84	2109.22	793.84	610.74	1198.04
MRC	Median-Based Robust	MRC	65535		ü	43	0.391021	0.380993	0.385973	0.749972	0.727143	1.06259	1.03074	0.296962	0.296962	0.54491	0.415732	0.703038	0.690497	0.750281	0.415701	0.600007	0.729511	0.66151	0.771668	0.609326	0.390674	0.228332	0.270489	0.33849	3.16	0.99933	1958.86	2098.92	778.2	621.04	1213.68
MRC	Median-Based Robust	MRC	65535		ü	46	0.390538	0.380554	0.385512	0.749761	0.728123	1.06616	1.03247	0.297196	0.297196	0.545125	0.415562	0.702804	0.690277	0.75007	0.415793	0.599734	0.729361	0.661176	0.771396	0.609158	0.390842	0.228604	0.270639	0.338824	3.16	0.99933	1958.06	2098.16	778.54	621.8	1213.34
MRC	Median-Based Robust	MRC	65535		ü	45	0.390505	0.380553	0.385495	0.749733	0.727886	1.06481	1.03182	0.297209	0.297209	0.545137	0.41549	0.702791	0.690276	0.75004	0.415783	0.599697	0.729379	0.661126	0.771314	0.609238	0.390762	0.228686	0.270621	0.338874	3.16	0.99933	1957.72	2097.94	778.38	622.02	1213.5
MRC	Median-Based Robust	MRC	65535		ü	47	0.390456	0.38051	0.38545	0.749708	0.728569	1.06748	1.0331	0.297234	0.297234	0.545159	0.415434	0.702766	0.690255	0.750015	0.415788	0.599667	0.729367	0.661089	0.771279	0.609231	0.390769	0.228721	0.270633	0.338911	3.16	0.99933	1957.46	2097.84	778.4	622.12	1213.48
MRC	Median-Based Robust	MRC	65535		ü	44	0.390456	0.380565	0.385477	0.749681	0.727813	1.06468	1.03176	0.297226	0.297226	0.545153	0.415532	0.702774	0.690282	0.749984	0.415756	0.599632	0.729424	0.661032	0.771149	0.609416	0.390584	0.228851	0.270576	0.338968	3.16	0.99933	1957.92	2097.5	778.02	622.46	1213.86
MRC	Median-Based Robust	MRC	65535		ü	11	0.386811	0.374227	0.380465	0.74966	0.727809	1.05287	1.02604	0.29914	0.29914	0.546912	0.413923	0.70086	0.687113	0.750109	0.418441	0.599602	0.725056	0.661755	0.776059	0.598168	0.401832	0.223941	0.274944	0.338245	3.16	0.99933	1950.34	2110.86	800.4	609.1	1191.48
MRC	Median-Based Robust	MRC	65535		ü	12	0.386835	0.374339	0.380534	0.749634	0.726731	1.05007	1.02467	0.299119	0.299119	0.54689	0.414182	0.700881	0.68717	0.750077	0.418382	0.599571	0.72515	0.661685	0.77589	0.598449	0.401551	0.22411	0.27485	0.338315	3.16	0.99933	1951.56	2110.4	799.84	609.56	1192.04
MRC	Median-Based Robust	MRC	65535		ü	14	0.386945	0.374648	0.380745	0.749597	0.724901	1.04522	1.0223	0.299047	0.299047	0.546827	0.414798	0.700953	0.687324	0.750029	0.418237	0.599519	0.725389	0.661557	0.775534	0.599114	0.400886	0.224466	0.274611	0.338443	3.16	0.99933	1954.46	2109.42	798.52	610.54	1193.36
MRC	Median-Based Robust	MRC	65535		ü	48	0.390165	0.380258	0.385178	0.749574	0.729015	1.0693	1.03399	0.29737	0.29737	0.545285	0.415388	0.70263	0.690129	0.74988	0.415837	0.599495	0.72929	0.660875	0.77108	0.609178	0.390822	0.22892	0.27071	0.339125	3.16	0.99933	1957.24	2097.3	778.5	622.66	1213.38
MRC	Median-Based Robust	MRC	65535		ü	13	0.386821	0.374442	0.380579	0.749574	0.726209	1.04726	1.0233	0.299119	0.299119	0.546891	0.413766	0.700881	0.687221	0.750011	0.418315	0.599493	0.725256	0.661565	0.775641	0.598801	0.401199	0.224359	0.274744	0.338435	3.16	0.99933	1949.6	2109.72	799.16	610.24	1192.72
MRC	Median-Based Robust	MRC	65535		ü	50	0.389534	0.379731	0.3846	0.749278	0.729558	1.07062	1.03463	0.297663	0.297663	0.545552	0.41512	0.702337	0.689865	0.749578	0.415931	0.599117	0.729136	0.660398	0.770622	0.609109	0.390891	0.229378	0.270864	0.339602	3.16	0.99933	1955.98	2096.06	778.64	623.9	1213.24
MRC	Median-Based Robust	MRC	65535		ü	49	0.389534	0.379754	0.384612	0.749264	0.729235	1.06944	1.03405	0.297663	0.297663	0.545554	0.415175	0.702337	0.689877	0.749564	0.415915	0.599097	0.729163	0.660372	0.770564	0.60919	0.39081	0.229436	0.270837	0.339628	3.16	0.99933	1956.24	2095.9	778.48	624.06	1213.4
MRC	Median-Based Robust	MRC	65535		ü	51	0.389086	0.379336	0.384179	0.749077	0.730356	1.0727	1.03564	0.297875	0.297875	0.545749	0.414772	0.702125	0.689668	0.749376	0.416013	0.598858	0.729003	0.660083	0.770345	0.608991	0.391009	0.229655	0.270997	0.339917	3.16	0.99933	1954.34	2095.3	778.88	624.66	1213
MRC	Median-Based Robust	MRC	65535		ü	53	0.388898	0.379262	0.384049	0.748938	0.730611	1.07399	1.03626	0.29796	0.29796	0.545826	0.414844	0.70204	0.689631	0.749231	0.415986	0.598682	0.729049	0.659849	0.77	0.609262	0.390738	0.23	0.270951	0.340151	3.16	0.99933	1954.68	2094.36	778.34	625.6	1213.54
MRC	Median-Based Robust	MRC	65535		ü	52	0.388737	0.379021	0.383847	0.748921	0.730445	1.0735	1.03602	0.298041	0.298041	0.545899	0.414942	0.701959	0.689511	0.749218	0.416079	0.598659	0.728898	0.659838	0.770134	0.608888	0.391112	0.229866	0.271102	0.340162	3.16	0.99933	1955.14	2094.72	779.08	625.24	1212.8
MRC	Median-Based Robust	MRC	65535		ü	10	0.384863	0.372389	0.378573	0.748864	0.729596	1.05689	1.028	0.300057	0.300057	0.547751	0.413045	0.699943	0.686195	0.749309	0.418867	0.598583	0.724361	0.660502	0.775148	0.597241	0.402759	0.224852	0.275639	0.339498	3.16	0.99933	1946.2	2108.38	802.24	611.58	1189.64
MRC	Median-Based Robust	MRC	65535		ü	54	0.388645	0.378988	0.383785	0.748849	0.730815	1.07522	1.03685	0.298083	0.298083	0.545937	0.41495	0.701917	0.689494	0.749144	0.416063	0.598569	0.728921	0.659723	0.769955	0.609033	0.390967	0.230045	0.271079	0.340277	3.16	0.99933	1955.18	2094.24	778.8	625.72	1213.08
MRC	Median-Based Robust	MRC	65535		ü	56	0.388338	0.378663	0.383468	0.748745	0.731748	1.07786	1.03813	0.298232	0.298232	0.546073	0.41453	0.701768	0.689331	0.749042	0.416157	0.598436	0.728768	0.65957	0.769908	0.608755	0.391245	0.230092	0.271232	0.34043	3.16	0.99933	1953.2	2094.1	779.36	625.86	1212.52
MRC	Median-Based Robust	MRC	65535		ü	55	0.388239	0.378578	0.383376	0.748694	0.731595	1.0769	1.03767	0.298278	0.298278	0.546118	0.414458	0.701722	0.689289	0.748989	0.416173	0.59837	0.728744	0.659494	0.769824	0.608754	0.391246	0.230176	0.271256	0.340506	3.16	0.99933	1952.86	2093.88	779.36	626.08	1212.52
MRC	Median-Based Robust	MRC	65535		ü	9	0.384024	0.371427	0.377671	0.748615	0.731586	1.0623	1.03062	0.300464	0.300464	0.548121	0.412629	0.699536	0.685714	0.749069	0.419161	0.598267	0.723874	0.660149	0.775172	0.596256	0.403744	0.224828	0.276126	0.339851	3.16	0.99933	1944.24	2108.44	804.22	611.52	1187.66
MRC	Median-Based Robust	MRC	65535		ü	57	0.38785	0.378209	0.382998	0.748539	0.732351	1.07941	1.03887	0.298461	0.298461	0.546286	0.414271	0.701539	0.689104	0.748834	0.416261	0.59817	0.728602	0.659249	0.769655	0.608554	0.391446	0.230345	0.271398	0.340751	3.16	0.99933	1951.98	2093.42	779.76	626.54	1212.12
MRC	Median-Based Robust	MRC	65535		ü	58	0.3875	0.377865	0.382651	0.7484	0.73278	1.08047	1.03938	0.298626	0.298626	0.546436	0.414119	0.701374	0.688932	0.748694	0.416346	0.597994	0.728463	0.659037	0.769515	0.60835	0.39165	0.230485	0.271537	0.340963	3.16	0.99933	1951.26	2093.04	780.16	626.92	1211.72
MRC	Median-Based Robust	MRC	65535		ü	59	0.387463	0.377824	0.382612	0.748384	0.733251	1.08174	1.03999	0.298648	0.298648	0.546455	0.413872	0.701352	0.688912	0.74868	0.416358	0.597975	0.728442	0.659022	0.769509	0.608315	0.391685	0.230491	0.271558	0.340978	3.16	0.99933	1950.1	2093.02	780.24	626.94	1211.64
MRC	Median-Based Robust	MRC	65535		ü	60	0.387041	0.377441	0.382209	0.748203	0.733633	1.08336	1.04077	0.298847	0.298847	0.546637	0.413889	0.701153	0.68872	0.748497	0.416441	0.597743	0.728307	0.658734	0.769276	0.608165	0.391835	0.230724	0.271693	0.341266	3.16	0.99933	1950.18	2092.38	780.54	627.58	1211.34
MRC	Median-Based Robust	MRC	65535		ü	62	0.38709	0.377526	0.382277	0.748202	0.734104	1.08458	1.04135	0.298822	0.298822	0.546615	0.413601	0.701178	0.688763	0.748494	0.416401	0.59774	0.728371	0.658719	0.769202	0.608324	0.391676	0.230798	0.271629	0.341281	3.16	0.99933	1948.82	2092.18	780.22	627.78	1211.66
MRC	Median-Based Robust	MRC	65535		ü	61	0.387047	0.377518	0.382252	0.748159	0.73379	1.08365	1.04091	0.298843	0.298843	0.546635	0.413766	0.701157	0.688759	0.74845	0.416391	0.597686	0.728389	0.658658	0.769091	0.608427	0.391573	0.230909	0.271611	0.341342	3.16	0.99933	1949.6	2091.88	780.02	628.08	1211.86
MRC	Median-Based Robust	MRC	65535		ü	63	0.387034	0.377568	0.38227	0.748129	0.734176	1.08478	1.04144	0.298843	0.298843	0.546633	0.413592	0.701157	0.688784	0.748417	0.416351	0.597649	0.728451	0.658583	0.768959	0.608609	0.391391	0.231041	0.271549	0.341417	3.16	0.99933	1948.78	2091.52	779.66	628.44	1212.22
MRC	Median-Based Robust	MRC	65535		ü	64	0.386596	0.377186	0.38186	0.747922	0.734783	1.08704	1.04252	0.299051	0.299051	0.546821	0.413461	0.700949	0.688593	0.748208	0.416423	0.597387	0.728331	0.658264	0.768656	0.60853	0.39147	0.231344	0.271669	0.341736	3.16	0.99933	1948.16	2090.7	779.82	629.26	1212.06
MRC	Median-Based Robust	MRC	65535		ü	65	0.386272	0.3769	0.381556	0.747777	0.735386	1.08916	1.04355	0.299204	0.299204	0.546963	0.413295	0.700796	0.68845	0.748061	0.41648	0.597199	0.72824	0.658032	0.768451	0.608449	0.391551	0.231549	0.27176	0.341968	3.16	0.99933	1947.38	2090.14	779.98	629.82	1211.9
MRC	Median-Based Robust	MRC	65535		ü	8	0.381747	0.369135	0.375386	0.747773	0.734494	1.0689	1.03382	0.301542	0.301542	0.549103	0.411173	0.698458	0.684567	0.748231	0.419748	0.597191	0.722911	0.658836	0.774469	0.594665	0.405335	0.225531	0.277089	0.341164	3.16	0.99933	1937.38	2106.52	807.38	613.44	1184.5
MRC	Median-Based Robust	MRC	65535		ü	66	0.386071	0.376744	0.381378	0.747674	0.735738	1.0901	1.04399	0.299297	0.299297	0.547049	0.413193	0.700703	0.688372	0.747956	0.416501	0.597067	0.728205	0.657867	0.768272	0.608472	0.391528	0.231728	0.271795	0.342133	3.16	0.99933	1946.9	2089.66	779.94	630.3	1211.94
MRC	Median-Based Robust	MRC	65535		ü	67	0.385886	0.37663	0.381229	0.747567	0.736023	1.0909	1.04438	0.299382	0.299382	0.547127	0.413053	0.700618	0.688315	0.747846	0.416501	0.596929	0.728204	0.657682	0.768047	0.608583	0.391417	0.231953	0.271796	0.342318	3.16	0.99933	1946.24	2089.04	779.72	630.92	1212.16
MRC	Median-Based Robust	MRC	65535		ü	68	0.385773	0.376592	0.381154	0.747474	0.736103	1.09165	1.04473	0.299433	0.299433	0.547171	0.413248	0.700567	0.688296	0.74775	0.416475	0.596815	0.728244	0.657529	0.767808	0.608784	0.391216	0.232192	0.271756	0.342471	3.16	0.99933	1947.16	2088.4	779.32	631.56	1212.56
MRC	Median-Based Robust	MRC	65535		ü	69	0.385725	0.376568	0.381118	0.747448	0.736409	1.09195	1.04488	0.299454	0.299454	0.547191	0.4129	0.700546	0.688284	0.747722	0.416472	0.596779	0.728249	0.657475	0.767745	0.608823	0.391177	0.232255	0.271751	0.342525	3.16	0.99933	1945.52	2088.22	779.24	631.74	1212.64
MRC	Median-Based Robust	MRC	65535		ü	70	0.385231	0.376095	0.380634	0.747238	0.736944	1.09348	1.04561	0.299692	0.299692	0.547407	0.412701	0.700308	0.688048	0.747513	0.416582	0.596514	0.728067	0.657164	0.767509	0.608586	0.391414	0.232491	0.271933	0.342836	3.16	0.99933	1944.58	2087.58	779.72	632.38	1212.16
MRC	Median-Based Robust	MRC	65535		ü	71	0.385075	0.375958	0.380488	0.747167	0.736982	1.09388	1.0458	0.299764	0.299764	0.547473	0.412794	0.700236	0.687979	0.74744	0.41661	0.596423	0.728023	0.657053	0.767404	0.608554	0.391446	0.232596	0.271977	0.342947	3.16	0.99933	1945.02	2087.3	779.78	632.66	1212.1
MRC	Median-Based Robust	MRC	65535		ü	7	0.379434	0.366707	0.373014	0.746956	0.73811	1.07851	1.03845	0.30265	0.30265	0.5501	0.409874	0.69735	0.683353	0.747426	0.420396	0.596159	0.721835	0.657599	0.773957	0.59275	0.40725	0.226043	0.278165	0.342401	3.16	0.99933	1931.26	2105.12	811.2	614.84	1180.68
MRC	Median-Based Robust	MRC	65535		ü	72	0.384506	0.375448	0.379949	0.746916	0.737542	1.09584	1.04674	0.300031	0.300031	0.547717	0.412705	0.699969	0.687724	0.747187	0.416717	0.596103	0.727849	0.656658	0.767066	0.608382	0.391618	0.232934	0.272151	0.343342	3.16	0.99933	1944.6	2086.38	780.12	633.58	1211.76
MRC	Median-Based Robust	MRC	65535		ü	73	0.384043	0.375005	0.379496	0.746722	0.738128	1.09694	1.04727	0.300252	0.300252	0.547918	0.412242	0.699748	0.687502	0.746993	0.416821	0.595858	0.727681	0.656362	0.766846	0.608158	0.391842	0.233154	0.272319	0.343638	3.16	0.99933	1942.42	2085.78	780.56	634.18	1211.32
MRC	Median-Based Robust	MRC	65535		ü	74	0.383956	0.374964	0.379432	0.746658	0.738382	1.09789	1.04773	0.300294	0.300294	0.547958	0.41217	0.699706	0.687482	0.746927	0.416812	0.595774	0.727697	0.656259	0.766694	0.60827	0.39173	0.233306	0.272303	0.343741	3.16	0.99933	1942.08	2085.36	780.34	634.6	1211.54
MRC	Median-Based Robust	MRC	65535		ü	75	0.383798	0.374813	0.379278	0.746585	0.73851	1.09833	1.04793	0.300371	0.300371	0.548026	0.412115	0.699629	0.687407	0.746854	0.416847	0.595684	0.72764	0.656159	0.766604	0.608209	0.391791	0.233396	0.27236	0.343841	3.16	0.99933	1941.82	2085.12	780.46	634.84	1211.42
MRC	Median-Based Robust	MRC	65535		ü	77	0.383055	0.374034	0.378516	0.746321	0.739571	1.10059	1.04901	0.300727	0.300727	0.54835	0.411563	0.699273	0.687017	0.746592	0.41706	0.595348	0.72729	0.655765	0.766437	0.607597	0.392403	0.233563	0.27271	0.344235	3.16	0.99933	1939.22	2084.66	781.68	635.3	1210.2
MRC	Median-Based Robust	MRC	65535		ü	76	0.383077	0.374106	0.378563	0.746298	0.739125	1.09968	1.04858	0.300715	0.300715	0.548339	0.411801	0.699285	0.687053	0.746566	0.417023	0.595319	0.727352	0.655725	0.766317	0.607789	0.392211	0.233683	0.272648	0.344275	3.16	0.99933	1940.34	2084.34	781.3	635.62	1210.58
MRC	Median-Based Robust	MRC	65535		ü	79	0.382823	0.373896	0.378332	0.746181	0.740021	1.10237	1.04986	0.300834	0.300834	0.548448	0.411491	0.699166	0.686948	0.746448	0.417057	0.595169	0.727295	0.655528	0.766137	0.60776	0.39224	0.233863	0.272705	0.344472	3.16	0.99933	1938.88	2083.84	781.36	636.12	1210.52
MRC	Median-Based Robust	MRC	65535		ü	78	0.382738	0.37383	0.378257	0.746137	0.740063	1.1021	1.04974	0.300872	0.300872	0.548482	0.411385	0.699128	0.686915	0.746403	0.417064	0.595113	0.727284	0.655455	0.766054	0.607776	0.392224	0.233946	0.272716	0.344545	3.16	0.99933	1938.38	2083.62	781.32	636.34	1210.56
MRC	Median-Based Robust	MRC	65535		ü	80	0.382588	0.373722	0.378127	0.746054	0.740573	1.1039	1.05059	0.300944	0.300944	0.548548	0.411258	0.699056	0.686861	0.746319	0.417073	0.595007	0.727267	0.655321	0.765901	0.607821	0.392179	0.234099	0.272733	0.344679	3.16	0.99933	1937.78	2083.2	781.24	636.76	1210.64
MRC	Median-Based Robust	MRC	65535		ü	81	0.382562	0.373703	0.378105	0.746041	0.741018	1.10513	1.05117	0.300957	0.300957	0.548561	0.411024	0.699043	0.686852	0.746306	0.417074	0.594988	0.727267	0.655294	0.765874	0.607829	0.392171	0.234126	0.272733	0.344706	3.16	0.99933	1936.68	2083.12	781.22	636.84	1210.66
MRC	Median-Based Robust	MRC	65535		ü	6	0.376865	0.364043	0.370397	0.746037	0.743336	1.0919	1.04487	0.303873	0.303873	0.551215	0.40801	0.696127	0.682021	0.746517	0.421101	0.594986	0.720673	0.656193	0.77332	0.590723	0.409277	0.22668	0.279327	0.343807	3.16	0.99933	1922.48	2103.4	815.24	616.56	1176.64
MRC	Median-Based Robust	MRC	65535		ü	82	0.382156	0.373363	0.377732	0.745841	0.741668	1.10683	1.05198	0.301148	0.301148	0.548734	0.41074	0.698852	0.686681	0.746103	0.417133	0.594736	0.727172	0.654984	0.765558	0.607805	0.392195	0.234442	0.272828	0.345016	3.16	0.99933	1935.34	2082.26	781.26	637.7	1210.62
MRC	Median-Based Robust	MRC	65535		ü	84	0.38199	0.373138	0.377537	0.745816	0.742012	1.10794	1.05251	0.301228	0.301228	0.548809	0.410655	0.698772	0.686569	0.746081	0.41722	0.594702	0.727031	0.654959	0.765661	0.607477	0.392523	0.234339	0.272969	0.345041	3.16	0.99933	1934.94	2082.54	781.92	637.42	1209.96
MRC	Median-Based Robust	MRC	65535		ü	85	0.381793	0.372928	0.377333	0.745748	0.742122	1.10804	1.05256	0.301322	0.301322	0.548895	0.410612	0.698678	0.686464	0.746013	0.41728	0.594616	0.726934	0.654859	0.765623	0.607305	0.392695	0.234377	0.273066	0.345141	3.16	0.99933	1934.74	2082.44	782.26	637.52	1209.62
MRC	Median-Based Robust	MRC	65535		ü	83	0.381929	0.37318	0.377528	0.74573	0.742007	1.10796	1.05252	0.301254	0.301254	0.548833	0.410617	0.698746	0.68659	0.74599	0.417162	0.594592	0.727125	0.654804	0.765374	0.607807	0.392193	0.234626	0.272875	0.345196	3.16	0.99933	1934.76	2081.76	781.26	638.2	1210.62
MRC	Median-Based Robust	MRC	65535		ü	91	0.381821	0.3731	0.377434	0.745669	0.743654	1.1137	1.05524	0.301305	0.301305	0.54888	0.410298	0.698695	0.68655	0.745928	0.417172	0.594514	0.72711	0.65471	0.765262	0.607838	0.392162	0.234738	0.27289	0.34529	3.16	0.99933	1933.26	2081.46	781.2	638.5	1210.68
MRC	Median-Based Robust	MRC	65535		ü	88	0.381634	0.37285	0.377215	0.745633	0.742975	1.11073	1.05383	0.301398	0.301398	0.548965	0.410362	0.698602	0.686425	0.745895	0.417262	0.594468	0.726962	0.654672	0.765352	0.607498	0.392502	0.234648	0.273038	0.345328	3.16	0.99933	1933.56	2081.7	781.88	638.26	1210
MRC	Median-Based Robust	MRC	65535		ü	90	0.381617	0.372826	0.377194	0.745629	0.743633	1.11333	1.05507	0.301407	0.301407	0.548974	0.410252	0.698593	0.686413	0.745891	0.417271	0.594462	0.726949	0.654668	0.765359	0.607467	0.392533	0.234641	0.273051	0.345332	3.16	0.99933	1933.04	2081.72	781.94	638.24	1209.94
MRC	Median-Based Robust	MRC	65535		ü	89	0.38155	0.372755	0.377125	0.745608	0.743289	1.11227	1.05457	0.301436	0.301436	0.549	0.410345	0.698564	0.686378	0.74587	0.417291	0.594436	0.726915	0.654635	0.765349	0.607406	0.392594	0.234651	0.273085	0.345365	3.16	0.99933	1933.48	2081.7	782.06	638.26	1209.82
MRC	Median-Based Robust	MRC	65535		ü	87	0.381575	0.372807	0.377164	0.7456	0.742712	1.10985	1.05341	0.301424	0.301424	0.548987	0.410451	0.698576	0.686403	0.745861	0.417268	0.594429	0.726953	0.654622	0.76529	0.607517	0.392483	0.23471	0.273047	0.345378	3.16	0.99933	1933.98	2081.54	781.84	638.42	1210.04
MRC	Median-Based Robust	MRC	65535		ü	86	0.381443	0.372611	0.377	0.745589	0.74253	1.10925	1.05313	0.301487	0.301487	0.549045	0.410494	0.698513	0.686305	0.745852	0.417346	0.594414	0.726825	0.654618	0.765407	0.607204	0.392796	0.234593	0.273175	0.345382	3.16	0.99933	1934.18	2081.86	782.46	638.1	1209.42
MRC	Median-Based Robust	MRC	65535		ü	92	0.381431	0.372732	0.377055	0.745505	0.743968	1.11516	1.05593	0.301491	0.301491	0.549052	0.410345	0.698509	0.686366	0.745763	0.417259	0.594304	0.726969	0.654462	0.765073	0.607659	0.392341	0.234927	0.273031	0.345538	3.16	0.99933	1933.48	2080.94	781.56	639.02	1210.32
MRC	Median-Based Robust	MRC	65535		ü	93	0.381292	0.37252	0.376879	0.745496	0.744295	1.11607	1.05636	0.301559	0.301559	0.549113	0.410133	0.698441	0.68626	0.745757	0.417345	0.594293	0.726827	0.654465	0.76521	0.607309	0.392691	0.23479	0.273173	0.345535	3.16	0.99933	1932.48	2081.32	782.26	638.64	1209.62
MRC	Median-Based Robust	MRC	65535		ü	94	0.381059	0.372299	0.376652	0.745397	0.744393	1.11602	1.05634	0.30167	0.30167	0.549215	0.410061	0.69833	0.68615	0.745658	0.417397	0.594167	0.726746	0.654313	0.765093	0.607206	0.392794	0.234907	0.273254	0.345687	3.16	0.99933	1932.14	2081	782.46	638.96	1209.42
MRC	Median-Based Robust	MRC	65535		ü	96	0.381028	0.372338	0.376656	0.745341	0.744915	1.11708	1.05684	0.301683	0.301683	0.549224	0.409674	0.698317	0.686169	0.745599	0.417355	0.594098	0.726812	0.654216	0.764901	0.607437	0.392563	0.235099	0.273188	0.345784	3.16	0.99933	1930.32	2080.48	782	639.48	1209.88
MRC	Median-Based Robust	MRC	65535		ü	95	0.380973	0.37226	0.37659	0.745336	0.744609	1.11637	1.0565	0.301708	0.301708	0.549248	0.409861	0.698292	0.68613	0.745594	0.417386	0.594091	0.726762	0.654211	0.764944	0.607316	0.392684	0.235056	0.273238	0.345789	3.16	0.99933	1931.2	2080.6	782.24	639.36	1209.64
MRC	Median-Based Robust	MRC	65535		ü	97	0.380732	0.372069	0.376374	0.745209	0.745068	1.11724	1.05691	0.301823	0.301823	0.549353	0.409547	0.698177	0.686034	0.745466	0.417414	0.593931	0.726715	0.654017	0.764729	0.60734	0.39266	0.235271	0.273285	0.345983	3.16	0.99933	1929.72	2080.02	782.2	639.94	1209.68
MRC	Median-Based Robust	MRC	65535		ü	99	0.380598	0.371962	0.376254	0.745142	0.745514	1.11824	1.05739	0.301886	0.301886	0.549411	0.409305	0.698114	0.685981	0.745397	0.417428	0.593844	0.726692	0.653906	0.764613	0.607348	0.392652	0.235387	0.273308	0.346094	3.16	0.99933	1928.58	2079.7	782.18	640.26	1209.7
MRC	Median-Based Robust	MRC	65535		ü	98	0.380415	0.371815	0.376089	0.745049	0.74556	1.11806	1.05731	0.301971	0.301971	0.54949	0.409157	0.698029	0.685908	0.745303	0.417451	0.593725	0.726657	0.653758	0.764457	0.607358	0.392642	0.235543	0.273343	0.346242	3.16	0.99933	1927.88	2079.28	782.16	640.68	1209.72
MRC	Median-Based Robust	MRC	65535		ü	100	0.380287	0.371684	0.37596	0.744995	0.745819	1.11957	1.05802	0.302035	0.302035	0.549546	0.409343	0.697965	0.685842	0.74525	0.417483	0.593659	0.726602	0.653684	0.764406	0.607279	0.392721	0.235594	0.273398	0.346316	3.16	0.99933	1928.76	2079.14	782.32	640.82	1209.56
MRC	Median-Based Robust	MRC	65535		ü	5	0.372417	0.359363	0.36583	0.744499	0.75027	1.11028	1.05363	0.305988	0.305988	0.553125	0.405432	0.694012	0.679681	0.744999	0.422356	0.593035	0.71859	0.653828	0.77241	0.586953	0.413047	0.22759	0.28141	0.346172	3.18	0.999326	1910.32	2100.92	822.74	619.02	1169.14
MRC	Median-Based Robust	MRC	65535		ü	4	0.366206	0.353171	0.359627	0.742156	0.76165	1.14183	1.06851	0.308934	0.308934	0.555781	0.401667	0.691066	0.676586	0.742668	0.423893	0.590069	0.716032	0.650174	0.770331	0.58284	0.41716	0.229669	0.283968	0.349826	3.18	0.999326	1892.58	2095.26	830.96	624.68	1160.92
MRC	Median-Based Robust	MRC	-1			26	0.378381	0.37475	0.376561	0.740661	0.735162	1.06405	1.03147	0.303007	0.303007	0.550429	0.406528	0.696993	0.687375	0.740727	0.41422	0.588176	0.731914	0.646467	0.749671	0.625079	0.374921	0.250329	0.268086	0.353533	3.16	0.99933	1915.5	2039.06	746.82	680.9	1245.06
MRC	Median-Based Robust	MRC	-1			27	0.377973	0.374168	0.376065	0.74064	0.735378	1.06459	1.03173	0.303198	0.303198	0.550607	0.406482	0.696802	0.687084	0.740711	0.414473	0.588143	0.731511	0.646462	0.750053	0.624115	0.375885	0.249947	0.268489	0.353538	3.16	0.99933	1915.28	2040.08	748.74	679.88	1243.14
MRC	Median-Based Robust	MRC	-1			28	0.378162	0.374482	0.376316	0.740599	0.735811	1.0658	1.03231	0.303117	0.303117	0.550534	0.406193	0.696883	0.687241	0.740667	0.414318	0.588093	0.73176	0.646402	0.74971	0.624772	0.375228	0.25029	0.26824	0.353598	3.16	0.99933	1913.92	2039.16	747.44	680.8	1244.44
MRC	Median-Based Robust	MRC	-1			39	0.377192	0.373081	0.37513	0.740571	0.740178	1.08356	1.04088	0.303559	0.303559	0.550934	0.405637	0.696441	0.686541	0.740651	0.414926	0.588059	0.73077	0.646422	0.750691	0.622391	0.377609	0.249309	0.26923	0.353578	3.16	0.99933	1911.3	2041.84	752.2	678.12	1239.68
MRC	Median-Based Robust	MRC	-1			29	0.377807	0.374029	0.375912	0.740536	0.736184	1.06785	1.0333	0.303283	0.303283	0.550683	0.40624	0.696717	0.687014	0.740607	0.414493	0.588017	0.731476	0.646331	0.749878	0.62415	0.37585	0.250122	0.268524	0.353669	3.16	0.99933	1914.14	2039.62	748.68	680.34	1243.2
MRC	Median-Based Robust	MRC	-1			38	0.37718	0.37311	0.375139	0.740526	0.739393	1.08029	1.0393	0.303567	0.303567	0.550941	0.405752	0.696433	0.686555	0.740604	0.414894	0.588004	0.730823	0.646357	0.750542	0.622568	0.377432	0.249458	0.269177	0.353643	3.16	0.99933	1911.84	2041.44	751.84	678.52	1240.04
MRC	Median-Based Robust	MRC	-1			32	0.377455	0.373587	0.375515	0.740483	0.736812	1.07027	1.03447	0.303444	0.303444	0.550829	0.406164	0.696556	0.686793	0.740556	0.414662	0.58795	0.731197	0.646258	0.750061	0.623525	0.376475	0.249939	0.268803	0.353742	3.16	0.99933	1913.78	2040.12	749.94	679.84	1241.94
MRC	Median-Based Robust	MRC	-1			36	0.377243	0.373271	0.37525	0.740469	0.738311	1.07613	1.0373	0.303546	0.303546	0.55092	0.405913	0.696454	0.686635	0.740545	0.414795	0.587934	0.730979	0.646264	0.750265	0.623006	0.376994	0.249735	0.269021	0.353736	3.16	0.99933	1912.6	2040.68	750.98	679.28	1240.9
MRC	Median-Based Robust	MRC	-1			31	0.377435	0.373593	0.375508	0.740452	0.736541	1.06899	1.03386	0.303453	0.303453	0.550841	0.406125	0.696547	0.686797	0.740524	0.414643	0.587906	0.731234	0.646201	0.749958	0.623636	0.376364	0.250042	0.268766	0.353799	3.16	0.99933	1913.6	2039.84	749.7	680.12	1242.18
MRC	Median-Based Robust	MRC	-1			33	0.377219	0.373278	0.375242	0.740442	0.737169	1.07141	1.03502	0.303554	0.303554	0.550929	0.405977	0.696446	0.686639	0.740516	0.414784	0.587898	0.731003	0.646216	0.750178	0.6231	0.3769	0.249822	0.268997	0.353784	3.16	0.99933	1912.9	2040.44	750.78	679.52	1241.1
MRC	Median-Based Robust	MRC	-1			30	0.377344	0.373498	0.375415	0.740411	0.736715	1.06969	1.03419	0.303499	0.303499	0.550879	0.40621	0.696501	0.686749	0.740483	0.414667	0.587858	0.731191	0.646153	0.749919	0.623579	0.376421	0.250081	0.268809	0.353847	3.16	0.99933	1914	2039.74	749.82	680.22	1242.06
MRC	Median-Based Robust	MRC	-1			25	0.377949	0.374434	0.376186	0.740385	0.735446	1.06384	1.03137	0.303223	0.303223	0.550628	0.406121	0.696777	0.687217	0.740448	0.414235	0.587827	0.731885	0.646063	0.749135	0.625299	0.374701	0.250865	0.268115	0.353937	3.16	0.99933	1913.58	2037.62	746.4	682.34	1245.48
MRC	Median-Based Robust	MRC	-1			37	0.376878	0.372827	0.374846	0.740384	0.739002	1.07852	1.03845	0.303716	0.303716	0.551076	0.405709	0.696284	0.686413	0.740462	0.414959	0.587826	0.730721	0.646157	0.75036	0.622467	0.377533	0.24964	0.269279	0.353843	3.16	0.99933	1911.64	2040.94	752.04	679.02	1239.84
MRC	Median-Based Robust	MRC	-1			35	0.376966	0.373006	0.37498	0.740359	0.738103	1.07538	1.03693	0.303673	0.303673	0.551035	0.405862	0.696327	0.686503	0.740434	0.414861	0.587795	0.730873	0.646093	0.750145	0.622861	0.377139	0.249855	0.269127	0.353907	3.16	0.99933	1912.36	2040.36	751.26	679.6	1240.62
MRC	Median-Based Robust	MRC	-1			41	0.376254	0.371973	0.374106	0.740339	0.741235	1.08715	1.0426	0.304	0.304	0.551333	0.405459	0.696	0.685986	0.740424	0.415307	0.587768	0.73015	0.646104	0.750868	0.621104	0.378896	0.249132	0.26985	0.353896	3.16	0.99933	1910.46	2042.32	754.76	677.64	1237.12
MRC	Median-Based Robust	MRC	-1			34	0.376955	0.373009	0.374976	0.740339	0.737585	1.07314	1.03585	0.303682	0.303682	0.551043	0.405892	0.696318	0.686505	0.740414	0.414852	0.58777	0.730889	0.646066	0.750089	0.62292	0.37708	0.249911	0.269111	0.353934	3.16	0.99933	1912.5	2040.2	751.14	679.76	1240.74
MRC	Median-Based Robust	MRC	-1			40	0.376524	0.372393	0.374452	0.740326	0.740679	1.08471	1.04143	0.303877	0.303877	0.551223	0.405383	0.696123	0.686196	0.740407	0.415116	0.58775	0.730461	0.646064	0.750515	0.621878	0.378122	0.249485	0.269539	0.353936	3.16	0.99933	1910.1	2041.36	753.22	678.6	1238.66
MRC	Median-Based Robust	MRC	-1			47	0.37532	0.370622	0.372963	0.740289	0.743761	1.0947	1.04621	0.304433	0.304433	0.551726	0.404534	0.695567	0.685311	0.740387	0.415877	0.587704	0.729228	0.646091	0.751743	0.618879	0.381121	0.248257	0.270772	0.353909	3.16	0.99933	1906.1	2044.7	759.18	675.26	1232.7
MRC	Median-Based Robust	MRC	-1			42	0.375996	0.371653	0.373817	0.740281	0.741918	1.08831	1.04315	0.304119	0.304119	0.551442	0.404856	0.695881	0.685827	0.740367	0.415423	0.587695	0.729967	0.646029	0.75094	0.620713	0.379287	0.24906	0.270033	0.353971	3.16	0.99933	1907.62	2042.52	755.52	677.44	1236.36
MRC	Median-Based Robust	MRC	-1			45	0.375502	0.370957	0.373222	0.740239	0.743128	1.09255	1.04519	0.304352	0.304352	0.551654	0.404555	0.695648	0.685479	0.740333	0.415708	0.587639	0.729506	0.645996	0.751348	0.619609	0.380391	0.248652	0.270494	0.354004	3.16	0.99933	1906.2	2043.62	757.72	676.34	1234.16
MRC	Median-Based Robust	MRC	-1			46	0.375362	0.370759	0.373053	0.740236	0.743451	1.09369	1.04573	0.304412	0.304412	0.551706	0.404551	0.695588	0.68538	0.74033	0.415793	0.587638	0.729366	0.645996	0.751483	0.619277	0.380723	0.248517	0.270634	0.354004	3.16	0.99933	1906.18	2044	758.38	675.96	1233.5
MRC	Median-Based Robust	MRC	-1			53	0.374341	0.369318	0.37182	0.740161	0.746053	1.10335	1.05034	0.304892	0.304892	0.552143	0.40433	0.695108	0.684659	0.740272	0.416388	0.58754	0.728398	0.645943	0.752365	0.616953	0.383047	0.247635	0.271602	0.354057	3.16	0.99933	1905.14	2046.38	763.02	673.58	1228.86
MRC	Median-Based Robust	MRC	-1			57	0.374226	0.369139	0.371673	0.74016	0.747386	1.10881	1.05294	0.304947	0.304947	0.552195	0.404389	0.695053	0.684569	0.740273	0.41647	0.587538	0.728267	0.64596	0.752504	0.616635	0.383365	0.247496	0.271733	0.35404	3.16	0.99933	1905.42	2046.76	763.66	673.2	1228.22
MRC	Median-Based Robust	MRC	-1			43	0.375535	0.371141	0.373331	0.740138	0.74236	1.09001	1.04397	0.304339	0.304339	0.551643	0.404873	0.695661	0.685571	0.740226	0.415584	0.587512	0.729708	0.645827	0.750921	0.620221	0.379779	0.249079	0.270292	0.354173	3.16	0.99933	1907.7	2042.46	756.5	677.5	1235.38
MRC	Median-Based Robust	MRC	-1			48	0.374667	0.369859	0.372254	0.740117	0.74455	1.09712	1.04737	0.304743	0.304743	0.552006	0.404245	0.695257	0.684929	0.74022	0.416135	0.587489	0.728807	0.64586	0.751838	0.618021	0.381979	0.248162	0.271193	0.35414	3.16	0.99933	1904.74	2044.96	760.9	675	1230.98
MRC	Median-Based Robust	MRC	-1			24	0.377412	0.373999	0.375701	0.74008	0.735624	1.06334	1.03113	0.303491	0.303491	0.550872	0.405824	0.696509	0.687	0.740141	0.414289	0.587441	0.731801	0.645611	0.748604	0.625396	0.374604	0.251396	0.268199	0.354389	3.16	0.99933	1912.18	2036.16	746.2	683.8	1245.68
MRC	Median-Based Robust	MRC	-1			44	0.375261	0.370818	0.373032	0.740071	0.742916	1.09151	1.04469	0.304467	0.304467	0.551757	0.404508	0.695533	0.685409	0.740161	0.415692	0.587429	0.72953	0.645731	0.750971	0.619847	0.380153	0.249029	0.27047	0.354269	3.16	0.99933	1905.98	2042.6	757.24	677.36	1234.64
MRC	Median-Based Robust	MRC	-1			58	0.373877	0.368787	0.371322	0.740034	0.747972	1.11083	1.0539	0.305108	0.305108	0.552339	0.404211	0.694892	0.684393	0.740146	0.416563	0.587379	0.728115	0.645763	0.7524	0.616387	0.383613	0.2476	0.271885	0.354237	3.16	0.99933	1904.58	2046.48	764.14	673.48	1227.74
MRC	Median-Based Robust	MRC	-1			52	0.374198	0.369261	0.37172	0.740033	0.746036	1.10303	1.05019	0.304964	0.304964	0.552208	0.404351	0.695036	0.684631	0.74014	0.416357	0.587379	0.728448	0.64575	0.752047	0.617215	0.382785	0.247953	0.271552	0.35425	3.16	0.99933	1905.24	2045.52	762.5	674.44	1229.38
MRC	Median-Based Robust	MRC	-1			59	0.373729	0.368562	0.371135	0.740027	0.748379	1.11192	1.05442	0.30518	0.30518	0.552403	0.40402	0.69482	0.684281	0.740142	0.416659	0.587374	0.727954	0.645774	0.75256	0.616001	0.383999	0.24744	0.272046	0.354226	3.16	0.99933	1903.68	2046.92	764.92	673.04	1226.96
MRC	Median-Based Robust	MRC	-1			55	0.373963	0.368956	0.37145	0.73999	0.74694	1.10613	1.05167	0.305078	0.305078	0.552314	0.404164	0.694922	0.684478	0.7401	0.416476	0.587322	0.728259	0.645704	0.752161	0.616794	0.383206	0.247839	0.271741	0.354296	3.16	0.99933	1904.36	2045.82	763.34	674.14	1228.54
MRC	Median-Based Robust	MRC	-1			56	0.373883	0.368866	0.371365	0.739965	0.747284	1.10817	1.05264	0.305116	0.305116	0.552347	0.40436	0.694884	0.684433	0.740076	0.416503	0.587293	0.728212	0.645671	0.752161	0.616706	0.383294	0.247839	0.271788	0.354329	3.16	0.99933	1905.28	2045.82	763.52	674.14	1228.36
MRC	Median-Based Robust	MRC	-1			60	0.373496	0.368293	0.370884	0.739961	0.748549	1.11315	1.05501	0.305291	0.305291	0.552505	0.404219	0.694709	0.684146	0.740078	0.416748	0.587289	0.727813	0.645684	0.752575	0.615718	0.384282	0.247425	0.272187	0.354316	3.16	0.99933	1904.62	2046.96	765.48	673	1226.4
MRC	Median-Based Robust	MRC	-1			49	0.374087	0.369186	0.371627	0.739957	0.745183	1.09915	1.04834	0.305019	0.305019	0.552257	0.40405	0.694981	0.684593	0.740062	0.416358	0.587285	0.728446	0.645641	0.75189	0.617295	0.382705	0.24811	0.271554	0.354359	3.16	0.99933	1903.82	2045.1	762.34	674.86	1229.54
MRC	Median-Based Robust	MRC	-1			54	0.373869	0.368888	0.371369	0.73993	0.746779	1.10525	1.05124	0.305125	0.305125	0.552356	0.404041	0.694875	0.684444	0.740039	0.416477	0.587247	0.728255	0.645614	0.752043	0.616845	0.383155	0.247957	0.271745	0.354386	3.16	0.99933	1903.78	2045.5	763.24	674.46	1228.64
MRC	Median-Based Robust	MRC	-1			50	0.374001	0.369104	0.371544	0.739915	0.745671	1.10078	1.04911	0.305061	0.305061	0.552294	0.403961	0.694939	0.684552	0.740021	0.416374	0.587235	0.728416	0.645585	0.751837	0.617267	0.382733	0.248163	0.271584	0.354415	3.16	0.99933	1903.4	2044.96	762.4	675	1229.48
MRC	Median-Based Robust	MRC	-1			51	0.373692	0.368789	0.371231	0.739797	0.746104	1.10203	1.04971	0.30521	0.30521	0.552429	0.403893	0.69479	0.684394	0.739903	0.41646	0.587086	0.728277	0.645415	0.751742	0.617047	0.382953	0.248258	0.271723	0.354585	3.16	0.99933	1903.08	2044.7	762.84	675.26	1229.04
MRC	Median-Based Robust	MRC	-1			61	0.373003	0.367828	0.370405	0.739746	0.748889	1.11399	1.0554	0.305528	0.305528	0.552721	0.40402	0.694472	0.683914	0.739862	0.416852	0.587015	0.727644	0.645359	0.752311	0.615517	0.384483	0.247689	0.272356	0.354641	3.16	0.99933	1903.68	2046.24	765.88	673.72	1226
MRC	Median-Based Robust	MRC	-1			62	0.372433	0.367158	0.369785	0.739593	0.749534	1.11557	1.05615	0.3058	0.3058	0.552966	0.403744	0.6942	0.683579	0.739713	0.417078	0.586825	0.727274	0.64516	0.752391	0.614767	0.385233	0.247609	0.272726	0.35484	3.16	0.99933	1902.38	2046.46	767.38	673.5	1224.5
MRC	Median-Based Robust	MRC	-1			23	0.376063	0.372746	0.3744	0.73945	0.736316	1.0632	1.03106	0.304149	0.304149	0.551471	0.404962	0.695851	0.686373	0.739509	0.414564	0.586646	0.731357	0.644706	0.747778	0.624968	0.375032	0.252222	0.268643	0.355294	3.16	0.99933	1908.12	2033.92	747.06	686.04	1244.82
MRC	Median-Based Robust	MRC	-1			63	0.371663	0.366422	0.369033	0.739264	0.750056	1.11798	1.05728	0.306169	0.306169	0.5533	0.403846	0.693831	0.683211	0.739383	0.41725	0.586411	0.726993	0.64467	0.752009	0.614413	0.385587	0.247991	0.273007	0.35533	3.16	0.99933	1902.86	2045.42	768.08	674.54	1223.8
MRC	Median-Based Robust	MRC	-1			64	0.371179	0.365997	0.368578	0.73902	0.750625	1.11924	1.05787	0.306407	0.306407	0.553513	0.403502	0.693593	0.682998	0.739137	0.417328	0.586105	0.726865	0.644314	0.751643	0.614353	0.385647	0.248357	0.273135	0.355686	3.16	0.99933	1901.24	2044.42	768.2	675.54	1223.68
MRC	Median-Based Robust	MRC	-1			22	0.37506	0.371915	0.373483	0.738892	0.736456	1.06318	1.03105	0.30465	0.30465	0.551925	0.404856	0.69535	0.685958	0.738948	0.41468	0.585943	0.731167	0.643893	0.746841	0.625074	0.374926	0.253159	0.268833	0.356107	3.16	0.99933	1907.62	2031.36	746.86	688.6	1245.02
MRC	Median-Based Robust	MRC	-1			66	0.370864	0.365722	0.368283	0.738872	0.751079	1.121	1.0587	0.306555	0.306555	0.553646	0.403532	0.693445	0.682861	0.738987	0.417378	0.585919	0.726783	0.644081	0.751422	0.6143	0.3857	0.248578	0.273217	0.355919	3.16	0.99933	1901.38	2043.82	768.3	676.14	1223.58
MRC	Median-Based Robust	MRC	-1			69	0.370529	0.365273	0.367891	0.738818	0.751898	1.12453	1.06037	0.306717	0.306717	0.553791	0.40349	0.693283	0.682637	0.738938	0.417549	0.585852	0.726503	0.644026	0.751613	0.61366	0.38634	0.248387	0.273497	0.355974	3.16	0.99933	1901.18	2044.34	769.58	675.62	1222.3
MRC	Median-Based Robust	MRC	-1			68	0.370523	0.365295	0.367899	0.738798	0.751418	1.12299	1.05965	0.306721	0.306721	0.553796	0.40363	0.693279	0.682647	0.738918	0.417532	0.585825	0.726532	0.643992	0.751543	0.613752	0.386248	0.248457	0.273468	0.356008	3.16	0.99933	1901.84	2044.14	769.4	675.82	1222.48
MRC	Median-Based Robust	MRC	-1			65	0.370468	0.365288	0.367868	0.738738	0.751176	1.12066	1.05855	0.306746	0.306746	0.553818	0.403243	0.693254	0.682644	0.738855	0.417509	0.58575	0.726571	0.643896	0.751372	0.613917	0.386083	0.248628	0.273429	0.356104	3.16	0.99933	1900.02	2043.68	769.06	676.28	1222.82
MRC	Median-Based Robust	MRC	-1			67	0.370272	0.365035	0.367643	0.738707	0.751783	1.12309	1.05969	0.30684	0.30684	0.553903	0.403171	0.69316	0.682517	0.738827	0.417603	0.585711	0.726416	0.643857	0.751477	0.613558	0.386442	0.248523	0.273584	0.356143	3.16	0.99933	1899.68	2043.96	769.78	676	1222.1
MRC	Median-Based Robust	MRC	-1			70	0.370061	0.36483	0.367435	0.738615	0.752331	1.12585	1.061	0.306942	0.306942	0.553995	0.403345	0.693058	0.682415	0.738734	0.41765	0.585595	0.726337	0.643723	0.751371	0.613459	0.386541	0.248629	0.273663	0.356277	3.16	0.99933	1900.5	2043.68	769.98	676.28	1221.9
MRC	Median-Based Robust	MRC	-1			21	0.374529	0.371538	0.37303	0.738537	0.736702	1.06196	1.03045	0.304921	0.304921	0.552167	0.404203	0.695079	0.685769	0.73859	0.41469	0.585503	0.731144	0.643385	0.746142	0.625396	0.374604	0.253858	0.268856	0.356615	3.16	0.99933	1904.54	2029.46	746.24	690.5	1245.64
MRC	Median-Based Robust	MRC	-1			72	0.369725	0.364466	0.367085	0.738492	0.753145	1.12831	1.06216	0.307107	0.307107	0.554141	0.403002	0.692893	0.682233	0.738613	0.417755	0.585445	0.726164	0.643561	0.751305	0.613161	0.386839	0.248695	0.273836	0.356439	3.16	0.99933	1898.88	2043.5	770.58	676.46	1221.3
MRC	Median-Based Robust	MRC	-1			71	0.369581	0.364306	0.366933	0.738452	0.752619	1.12669	1.06139	0.307175	0.307175	0.554206	0.403231	0.692825	0.682153	0.738574	0.417806	0.585389	0.726084	0.643497	0.751308	0.612998	0.387002	0.248692	0.273916	0.356503	3.16	0.99933	1899.96	2043.5	770.9	676.46	1220.98
MRC	Median-Based Robust	MRC	-1			73	0.369091	0.363821	0.366445	0.738245	0.753748	1.13008	1.06298	0.307413	0.307413	0.554418	0.402777	0.692587	0.68191	0.738367	0.417927	0.585134	0.725885	0.643206	0.751093	0.612727	0.387273	0.248907	0.274115	0.356794	3.16	0.99933	1897.82	2042.92	771.44	677.04	1220.44
MRC	Median-Based Robust	MRC	-1			76	0.368843	0.363478	0.366149	0.738227	0.755013	1.13472	1.06516	0.307527	0.307527	0.554519	0.402611	0.692473	0.681739	0.738353	0.418063	0.585113	0.725658	0.643184	0.7513	0.612178	0.387822	0.2487	0.274342	0.356816	3.16	0.99933	1897.04	2043.48	772.54	676.48	1219.34
MRC	Median-Based Robust	MRC	-1			77	0.368745	0.36336	0.366042	0.738206	0.755408	1.13588	1.06571	0.307574	0.307574	0.554562	0.402433	0.692426	0.68168	0.738333	0.418103	0.585086	0.725591	0.643154	0.751329	0.612031	0.387969	0.248671	0.274409	0.356846	3.16	0.99933	1896.2	2043.56	772.84	676.4	1219.04
MRC	Median-Based Robust	MRC	-1			74	0.36888	0.363584	0.366221	0.738189	0.754262	1.13189	1.06383	0.30751	0.30751	0.554506	0.402747	0.69249	0.681792	0.738312	0.418002	0.585063	0.725761	0.643119	0.751109	0.612475	0.387525	0.248891	0.274239	0.356881	3.16	0.99933	1897.68	2042.96	771.94	677	1219.94
MRC	Median-Based Robust	MRC	-1			20	0.373641	0.37064	0.372136	0.738185	0.737262	1.06277	1.03085	0.305354	0.305354	0.552561	0.403787	0.694646	0.68532	0.73824	0.414928	0.585056	0.730758	0.642883	0.745831	0.624809	0.375191	0.254169	0.269242	0.357117	3.16	0.99933	1902.58	2028.6	747.42	691.36	1244.46
MRC	Median-Based Robust	MRC	-1			75	0.36877	0.363425	0.366086	0.738183	0.75475	1.13357	1.06463	0.307561	0.307561	0.554551	0.40262	0.692439	0.681712	0.738308	0.418068	0.585056	0.725654	0.643116	0.751211	0.612213	0.387787	0.248789	0.274346	0.356884	3.16	0.99933	1897.08	2043.24	772.46	676.72	1219.42
MRC	Median-Based Robust	MRC	-1			78	0.368327	0.362923	0.365614	0.738056	0.755998	1.13771	1.06657	0.307773	0.307773	0.554741	0.402229	0.692227	0.681461	0.738183	0.418226	0.584898	0.725389	0.642938	0.751233	0.61169	0.38831	0.248767	0.274611	0.357062	3.16	0.99933	1895.24	2043.3	773.52	676.66	1218.36
MRC	Median-Based Robust	MRC	-1			79	0.368301	0.362923	0.365601	0.738023	0.756354	1.13912	1.06722	0.307786	0.307786	0.554753	0.402216	0.692214	0.681462	0.73815	0.418213	0.584856	0.725414	0.642887	0.751138	0.611785	0.388215	0.248862	0.274586	0.357113	3.16	0.99933	1895.18	2043.04	773.32	676.92	1218.56
MRC	Median-Based Robust	MRC	-1			80	0.368197	0.362813	0.365494	0.737989	0.756898	1.14075	1.06799	0.307837	0.307837	0.554801	0.40203	0.692163	0.681407	0.738116	0.418246	0.584811	0.725361	0.642836	0.751126	0.611687	0.388313	0.248874	0.274639	0.357164	3.16	0.99933	1894.3	2043	773.52	676.96	1218.36
MRC	Median-Based Robust	MRC	-1			19	0.373111	0.370233	0.371668	0.737865	0.737241	1.06209	1.03052	0.305609	0.305609	0.552795	0.403668	0.694391	0.685117	0.737914	0.414966	0.584651	0.730705	0.642405	0.74522	0.625013	0.374987	0.25478	0.269295	0.357595	3.16	0.99933	1902.02	2026.96	746.98	693	1244.9
MRC	Median-Based Robust	MRC	-1			81	0.367537	0.362142	0.364828	0.73773	0.757399	1.14189	1.06853	0.308155	0.308155	0.555086	0.401758	0.691845	0.681071	0.737858	0.418421	0.584487	0.725074	0.642463	0.750898	0.611244	0.388756	0.249102	0.274926	0.357537	3.16	0.99933	1893.02	2042.38	774.4	677.58	1217.48
MRC	Median-Based Robust	MRC	-1			82	0.367472	0.36208	0.364765	0.737701	0.757704	1.14331	1.06919	0.308189	0.308189	0.555115	0.40183	0.691811	0.68104	0.737829	0.418435	0.584452	0.725048	0.642425	0.750869	0.611211	0.388789	0.249131	0.274952	0.357575	3.16	0.99933	1893.36	2042.3	774.48	677.66	1217.4
MRC	Median-Based Robust	MRC	-1			84	0.367349	0.36195	0.364639	0.737652	0.758248	1.1451	1.07003	0.308249	0.308249	0.555171	0.401732	0.691751	0.680975	0.737782	0.418469	0.584388	0.724995	0.642354	0.750826	0.611124	0.388876	0.249174	0.275005	0.357646	3.16	0.99933	1892.9	2042.18	774.64	677.78	1217.24
MRC	Median-Based Robust	MRC	-1			83	0.367234	0.36184	0.364526	0.737604	0.758247	1.1449	1.06994	0.308304	0.308304	0.555219	0.401592	0.691696	0.68092	0.737733	0.418496	0.58433	0.72495	0.642283	0.750774	0.611066	0.388934	0.249226	0.27505	0.357717	3.16	0.99933	1892.24	2042.04	774.76	677.92	1217.12
MRC	Median-Based Robust	MRC	-1			88	0.367127	0.361679	0.364391	0.737601	0.759219	1.14796	1.07137	0.308351	0.308351	0.555263	0.401372	0.691649	0.680839	0.737731	0.418562	0.584325	0.724844	0.642283	0.75088	0.610799	0.389201	0.24912	0.275156	0.357717	3.16	0.99933	1891.2	2042.34	775.28	677.62	1216.6
MRC	Median-Based Robust	MRC	-1			90	0.367015	0.361548	0.36427	0.737576	0.759618	1.14922	1.07196	0.308402	0.308402	0.555311	0.401325	0.691598	0.680774	0.737707	0.418608	0.58429	0.724772	0.642242	0.750902	0.610646	0.389354	0.249098	0.275228	0.357758	3.16	0.99933	1890.98	2042.4	775.58	677.56	1216.3
MRC	Median-Based Robust	MRC	-1			91	0.367011	0.361546	0.364267	0.737569	0.76009	1.15037	1.07249	0.308406	0.308406	0.555312	0.400998	0.691594	0.680773	0.7377	0.418604	0.584285	0.724775	0.642236	0.750887	0.61066	0.38934	0.249113	0.275225	0.357764	3.16	0.99933	1889.44	2042.36	775.56	677.6	1216.32
MRC	Median-Based Robust	MRC	-1			18	0.372577	0.369813	0.371191	0.737549	0.737063	1.0623	1.03062	0.305876	0.305876	0.553039	0.404075	0.694124	0.684906	0.737596	0.415012	0.584252	0.730634	0.641943	0.744651	0.625162	0.374838	0.255349	0.269366	0.358057	3.16	0.99933	1903.94	2025.4	746.68	694.56	1245.2
MRC	Median-Based Robust	MRC	-1			85	0.36699	0.361555	0.364261	0.737538	0.758744	1.14641	1.07064	0.308419	0.308419	0.555323	0.401457	0.691581	0.680777	0.737668	0.418587	0.584246	0.724802	0.642188	0.750795	0.610759	0.389241	0.249205	0.275198	0.357812	3.16	0.99933	1891.6	2042.1	775.36	677.86	1216.52
MRC	Median-Based Robust	MRC	-1			86	0.366982	0.361575	0.364267	0.737514	0.758884	1.14693	1.07088	0.308423	0.308423	0.555327	0.401427	0.691577	0.680788	0.737644	0.418567	0.584216	0.724833	0.642148	0.750713	0.610862	0.389138	0.249287	0.275167	0.357852	3.16	0.99933	1891.46	2041.88	775.16	678.08	1216.72
MRC	Median-Based Robust	MRC	-1			87	0.366881	0.361444	0.364151	0.737498	0.759219	1.14794	1.07136	0.30847	0.30847	0.55537	0.401316	0.69153	0.680722	0.737628	0.418618	0.584195	0.724752	0.642129	0.750764	0.610679	0.389321	0.249236	0.275248	0.357871	3.16	0.99933	1890.94	2042.02	775.52	677.94	1216.36
MRC	Median-Based Robust	MRC	-1			89	0.366833	0.361384	0.364097	0.737488	0.759517	1.14879	1.07175	0.308491	0.308491	0.55539	0.401329	0.691509	0.680692	0.737618	0.418638	0.584181	0.72472	0.642112	0.750777	0.610607	0.389393	0.249223	0.27528	0.357888	3.16	0.99933	1891	2042.06	775.66	677.9	1216.22
MRC	Median-Based Robust	MRC	-1			92	0.366634	0.361145	0.363878	0.737443	0.760395	1.15075	1.07267	0.308584	0.308584	0.555474	0.400807	0.691416	0.680572	0.737575	0.418722	0.584124	0.724584	0.64205	0.750829	0.610316	0.389684	0.249171	0.275416	0.35795	3.16	0.99933	1888.54	2042.2	776.24	677.76	1215.64
MRC	Median-Based Robust	MRC	-1			93	0.36647	0.360974	0.36371	0.737382	0.760807	1.15203	1.07326	0.308665	0.308665	0.555546	0.400705	0.691335	0.680487	0.737515	0.418764	0.584048	0.724511	0.641959	0.750785	0.610188	0.389812	0.249215	0.275489	0.358041	3.16	0.99933	1888.06	2042.08	776.5	677.88	1215.38
MRC	Median-Based Robust	MRC	-1			97	0.366305	0.360795	0.363538	0.737327	0.762284	1.15735	1.07574	0.308745	0.308745	0.555618	0.400357	0.691255	0.680398	0.737461	0.41882	0.58398	0.724419	0.641887	0.750772	0.610023	0.389977	0.249228	0.275581	0.358113	3.16	0.99933	1886.42	2042.04	776.84	677.92	1215.04
MRC	Median-Based Robust	MRC	-1			98	0.36626	0.360742	0.363489	0.737312	0.76267	1.15914	1.07657	0.308767	0.308767	0.555637	0.400412	0.691233	0.680371	0.737446	0.418836	0.583963	0.724391	0.641869	0.750769	0.609973	0.390027	0.249231	0.275609	0.358131	3.16	0.99933	1886.68	2042.04	776.94	677.92	1214.94
MRC	Median-Based Robust	MRC	-1			94	0.366252	0.360791	0.36351	0.737265	0.76127	1.1535	1.07395	0.308771	0.308771	0.555644	0.400527	0.691229	0.680395	0.737397	0.418795	0.5839	0.724463	0.641788	0.750593	0.610198	0.389802	0.249407	0.275537	0.358212	3.16	0.99933	1887.22	2041.56	776.48	678.4	1215.4
MRC	Median-Based Robust	MRC	-1			99	0.366034	0.360519	0.363265	0.737222	0.762857	1.16	1.07698	0.308873	0.308873	0.555735	0.400493	0.691127	0.680259	0.737356	0.418893	0.583848	0.7243	0.641734	0.750679	0.60984	0.39016	0.249321	0.2757	0.358266	3.16	0.99933	1887.06	2041.8	777.2	678.16	1214.68
MRC	Median-Based Robust	MRC	-1			95	0.366007	0.360483	0.363233	0.73722	0.761745	1.1552	1.07474	0.308885	0.308885	0.555746	0.400391	0.691115	0.680242	0.737354	0.418906	0.583844	0.72428	0.641727	0.750697	0.609786	0.390214	0.249303	0.27572	0.358273	3.16	0.99933	1886.58	2041.84	777.3	678.12	1214.58
MRC	Median-Based Robust	MRC	-1			96	0.366046	0.360569	0.363296	0.737202	0.762017	1.15626	1.07523	0.308868	0.308868	0.55573	0.400357	0.691132	0.680285	0.737334	0.418861	0.583822	0.724353	0.641693	0.75058	0.609989	0.390011	0.24942	0.275647	0.358307	3.16	0.99933	1886.42	2041.52	776.9	678.44	1214.98
MRC	Median-Based Robust	MRC	65535		ü	3	0.353214	0.340552	0.346823	0.737101	0.783416	1.19653	1.09379	0.315053	0.315053	0.561262	0.392764	0.684947	0.670276	0.737615	0.426897	0.583703	0.711015	0.642199	0.765244	0.575309	0.424691	0.234756	0.288985	0.357801	3.22	0.999317	1850.62	2081.38	845.94	638.52	1145.94
MRC	Median-Based Robust	MRC	-1			100	0.365548	0.360021	0.362772	0.737037	0.763451	1.16141	1.07763	0.309106	0.309106	0.555944	0.400196	0.690894	0.68001	0.737171	0.419027	0.583617	0.72408	0.641468	0.750532	0.609489	0.390511	0.249468	0.27592	0.358532	3.16	0.99933	1885.66	2041.4	777.9	678.56	1213.98
MRC	Median-Based Robust	MRC	-1			17	0.371211	0.368721	0.369963	0.736725	0.738493	1.06555	1.0322	0.306568	0.306568	0.553659	0.403519	0.693432	0.68436	0.736767	0.415129	0.583225	0.730439	0.640773	0.74318	0.62554	0.37446	0.25682	0.269561	0.359227	3.16	0.99933	1901.32	2021.4	745.94	698.56	1245.94
MRC	Median-Based Robust	MRC	-1			16	0.371056	0.368593	0.369821	0.736642	0.738362	1.065	1.03194	0.306645	0.306645	0.553728	0.403723	0.693355	0.684297	0.736683	0.415147	0.58312	0.730404	0.640651	0.743045	0.625548	0.374452	0.256955	0.269596	0.359349	3.16	0.99933	1902.28	2021.04	745.94	698.92	1245.94
MRC	Median-Based Robust	MRC	-1			15	0.37089	0.368724	0.369805	0.736271	0.738748	1.06438	1.03163	0.306759	0.306759	0.553832	0.403201	0.693241	0.684362	0.736307	0.414926	0.582658	0.730768	0.640122	0.741919	0.626806	0.373194	0.258081	0.269232	0.359878	3.16	0.99933	1899.82	2017.98	743.42	701.98	1248.46
MRC	Median-Based Robust	MRC	-1			14	0.369467	0.367446	0.368454	0.735561	0.740369	1.06767	1.03323	0.307459	0.307459	0.554466	0.402403	0.692541	0.683723	0.735595	0.41517	0.581764	0.730373	0.639094	0.740884	0.626563	0.373437	0.259116	0.269627	0.360906	3.16	0.99933	1896.06	2015.16	743.9	704.8	1247.98
MRC	Median-Based Robust	MRC	65535		ü	0	0.36334	0.358595	0.360958	0.735536	0.791813	1.27015	1.12692	0.310193	0.310193	0.556922	0.397972	0.689807	0.679298	0.735641	0.418997	0.581737	0.724122	0.639218	0.747371	0.611224	0.388776	0.252629	0.275878	0.360782	3.16	0.99933	1875.18	2032.84	774.46	687.12	1217.42
MRC	Median-Based Robust	MRC	-1			13	0.367216	0.365352	0.366282	0.734491	0.741528	1.06937	1.03406	0.308563	0.308563	0.555459	0.401682	0.691437	0.682676	0.73452	0.415627	0.580429	0.729626	0.63759	0.739473	0.625879	0.374121	0.260527	0.270374	0.36241	3.16	0.99933	1892.66	2011.34	745.28	708.62	1246.6
MRC	Median-Based Robust	MRC	-1			12	0.365454	0.363952	0.364701	0.733394	0.743166	1.07271	1.03566	0.309467	0.309467	0.556271	0.400947	0.690533	0.681976	0.733419	0.415758	0.57906	0.729415	0.636038	0.737475	0.626477	0.373523	0.262525	0.270585	0.363962	3.16	0.99933	1889.2	2005.88	744.08	714.08	1247.8
MRC	Median-Based Robust	MRC	-1			11	0.36148	0.360372	0.360924	0.731339	0.746477	1.07867	1.03855	0.311449	0.311449	0.558055	0.399054	0.688551	0.680186	0.73136	0.416436	0.576496	0.728316	0.633163	0.734447	0.625925	0.374075	0.265553	0.271684	0.366837	3.16	0.99933	1880.28	1997.64	745.18	722.32	1246.7
MRC	Median-Based Robust	MRC	65535		ü	2	0.333826	0.321611	0.32766	0.729632	0.82004	1.29858	1.13947	0.324198	0.324198	0.569352	0.380805	0.675802	0.660806	0.73016	0.431388	0.574392	0.703399	0.630427	0.757979	0.563633	0.436367	0.242021	0.296601	0.369573	3.5	0.999258	1794.16	2061.4	869.24	658.22	1122.64
MRC	Median-Based Robust	MRC	-1			10	0.357815	0.357095	0.357454	0.729372	0.749567	1.08647	1.04229	0.313296	0.313296	0.559703	0.397934	0.686704	0.678547	0.72939	0.417022	0.574062	0.727349	0.630466	0.731469	0.625625	0.374375	0.268531	0.272651	0.369534	3.16	0.99933	1875	1989.56	745.8	730.4	1246.08
MRC	Median-Based Robust	MRC	-1			0	0.347265	0.344144	0.3457	0.727578	0.816449	1.34698	1.16052	0.318071	0.318071	0.56395	0.389865	0.681929	0.672072	0.727639	0.421808	0.571843	0.719495	0.627771	0.735906	0.608238	0.391762	0.264094	0.280505	0.372229	3.16	0.99933	1836.98	2001.64	780.38	718.32	1211.5
MRC	Median-Based Robust	MRC	-1			9	0.353201	0.352941	0.35307	0.726902	0.754483	1.09804	1.04783	0.315631	0.315631	0.561786	0.395981	0.684369	0.67647	0.726921	0.417785	0.571006	0.726101	0.627101	0.727777	0.625164	0.374836	0.272223	0.273899	0.372899	3.16	0.99933	1865.8	1979.5	746.74	740.46	1245.14
MRC	Median-Based Robust	MRC	-1			8	0.350907	0.350911	0.350908	0.725614	0.757777	1.10449	1.0509	0.316798	0.316798	0.562824	0.394329	0.683202	0.675455	0.72563	0.418129	0.569418	0.725541	0.625366	0.725752	0.625159	0.374841	0.274248	0.274459	0.374634	3.16	0.99933	1858.02	1974	746.74	745.96	1245.14
MRC	Median-Based Robust	MRC	-1			7	0.344573	0.344914	0.344742	0.722476	0.76374	1.11806	1.05734	0.319968	0.319968	0.565638	0.39146	0.680032	0.672457	0.722492	0.419435	0.565562	0.723408	0.621165	0.721609	0.623304	0.376696	0.278391	0.276592	0.378835	3.16	0.99933	1844.5	1962.74	750.42	757.22	1241.46
MRC	Median-Based Robust	MRC	-1			6	0.338204	0.33892	0.338561	0.719222	0.771308	1.13311	1.06444	0.32319	0.32319	0.568472	0.387445	0.67681	0.66946	0.719244	0.420687	0.561593	0.721339	0.616865	0.717193	0.621727	0.378273	0.282807	0.278661	0.383135	3.16	0.99933	1825.58	1950.72	753.58	769.24	1238.3
MRC	Median-Based Robust	MRC	-1			5	0.330382	0.331408	0.330894	0.715391	0.780043	1.15588	1.07508	0.327113	0.327113	0.571917	0.383949	0.672887	0.665704	0.715417	0.422372	0.556929	0.718573	0.611809	0.712312	0.619096	0.380904	0.287688	0.281427	0.388191	3.18	0.999326	1809.1	1937.4	758.76	782.54	1233.12
MRC	Median-Based Robust	MRC	65535		ü	1	0.303622	0.296038	0.299805	0.714756	0.899601	1.5409	1.24128	0.33856	0.33856	0.581837	0.357063	0.66144	0.648019	0.715043	0.435898	0.556156	0.695676	0.607947	0.734985	0.561054	0.438946	0.265015	0.304324	0.392053	4.4	0.999067	1681.98	1998.38	874.22	720.6	1117.4
MRC	Median-Based Robust	MRC	-1			4	0.317877	0.319664	0.318768	0.708725	0.795612	1.19044	1.09103	0.333502	0.333502	0.577472	0.376436	0.666498	0.659832	0.708764	0.424742	0.548895	0.714624	0.603253	0.702983	0.616681	0.383319	0.297017	0.285376	0.396747	3.18	0.999326	1773.7	1912.08	763.54	807.86	1228.34
MRC	Median-Based Robust	MRC	-1			3	0.300694	0.303072	0.30188	0.699917	0.81941	1.25772	1.12142	0.342278	0.342278	0.585019	0.370518	0.657722	0.651536	0.699987	0.428401	0.53841	0.708478	0.592215	0.691635	0.611437	0.388563	0.308365	0.291522	0.407785	3.22	0.999317	1745.8	1881.18	774.02	838.72	1217.86
MRC	Median-Based Robust	MRC	-1			2	0.269392	0.272002	0.270693	0.685193	0.867321	1.39105	1.17938	0.357988	0.357988	0.598304	0.354604	0.642012	0.636001	0.685293	0.435859	0.521166	0.695754	0.573638	0.675033	0.596969	0.403031	0.324967	0.304246	0.426362	3.5	0.999258	1670.72	1835.8	802.84	883.82	1189.04
MRC	Median-Based Robust	MRC	-1			1	0.219572	0.222026	0.220795	0.662389	0.979812	1.75413	1.32438	0.382852	0.382852	0.618726	0.326706	0.617148	0.611013	0.662515	0.448004	0.495246	0.674492	0.54508	0.650789	0.571237	0.428763	0.349211	0.325508	0.45492	4.4	0.999067	1538.98	1769.48	853.96	949.5	1137.66
PCC	Standard Pearson without IOI	PCCnIOI	65535	ü	ü	67	0.385979	0.374095	0.379989	0.749041	0.72993	1.07849	1.03843	0.299481	0.299481	0.547216	0.417421	0.700519	0.687048	0.749454	0.418226	0.598813	0.72539	0.660589	0.774345	0.599751	0.400249	0.225655	0.27461	0.339411	3.12	0.999338	1966.84	2106.18	797.32	613.8	1194.58
PCC	Standard Pearson without IOI	PCCnIOI	65535	ü	ü	69	0.385802	0.37399	0.379849	0.748938	0.73049	1.07979	1.03905	0.299558	0.299558	0.547286	0.417162	0.700442	0.686995	0.749347	0.418224	0.598681	0.725396	0.660406	0.774116	0.599874	0.400126	0.225884	0.274604	0.339594	3.12	0.999338	1965.62	2105.56	797.06	614.42	1194.84
PCC	Standard Pearson without IOI	PCCnIOI	65535	ü	ü	68	0.385777	0.373948	0.379815	0.748932	0.730299	1.07937	1.03885	0.299575	0.299575	0.547301	0.41723	0.700425	0.686974	0.749343	0.41824	0.598675	0.725367	0.66041	0.77414	0.599808	0.400192	0.22586	0.274633	0.33959	3.12	0.999338	1965.94	2105.62	797.2	614.36	1194.7
COS	Cosine without IOI	COSnIOI	65535	ü	ü	53	0.378807	0.361409	0.370004	0.748912	0.727306	1.04564	1.02251	0.303365	0.303365	0.550755	0.412604	0.696635	0.680705	0.749669	0.423324	0.598649	0.716988	0.661819	0.783868	0.577541	0.422459	0.216132	0.283012	0.338181	3.12	0.999338	1944.14	2132.1	841.54	587.88	1150.36
PCC	Standard Pearson without IOI	PCCnIOI	65535	ü	ü	70	0.385614	0.373758	0.379638	0.748889	0.730796	1.08089	1.03958	0.299651	0.299651	0.547371	0.417078	0.700349	0.686879	0.749301	0.418299	0.598619	0.725272	0.660342	0.774154	0.599604	0.400396	0.225846	0.274728	0.339658	3.12	0.999338	1965.22	2105.66	797.6	614.32	1194.3
PCC	Standard Pearson without IOI	PCCnIOI	65535	ü	ü	7	0.382267	0.36793	0.375029	0.748838	0.738155	1.08684	1.04246	0.30143	0.30143	0.548997	0.412464	0.69857	0.683965	0.749396	0.420688	0.598552	0.721355	0.660912	0.778554	0.589376	0.410624	0.221446	0.278645	0.339088	3.12	0.999338	1943.48	2117.64	817.96	602.34	1173.94
COS	Cosine without IOI	COSnIOI	65535	ü	ü	10	0.368778	0.341751	0.355005	0.748824	0.745918	1.09923	1.04838	0.309341	0.309341	0.556153	0.407842	0.690659	0.670876	0.750313	0.430654	0.598536	0.704682	0.664095	0.798927	0.542825	0.457175	0.201073	0.295318	0.335905	3.12	0.999338	1921.7	2173.06	910.66	546.92	1081.24
COS	Cosine without IOI	COSnIOI	65535	ü	ü	54	0.378781	0.361581	0.370079	0.748821	0.727336	1.04554	1.02246	0.303356	0.303356	0.550747	0.412523	0.696644	0.68079	0.749566	0.42322	0.598533	0.71716	0.66162	0.783465	0.578116	0.421884	0.216535	0.28284	0.33838	3.12	0.999338	1943.76	2131	840.4	588.98	1151.5
PCC	Standard Pearson without IOI	PCCnIOI	65535	ü	ü	71	0.385433	0.373627	0.379483	0.748794	0.731059	1.08125	1.03976	0.299732	0.299732	0.547444	0.416802	0.700268	0.686814	0.749203	0.418313	0.598499	0.72525	0.660184	0.773975	0.599652	0.400348	0.226025	0.27475	0.339816	3.12	0.999338	1963.92	2105.18	797.5	614.8	1194.4
COS	Cosine without IOI	COSnIOI	65535	ü	ü	55	0.378603	0.361556	0.36998	0.748691	0.727485	1.04523	1.02231	0.303424	0.303424	0.550808	0.412184	0.696576	0.680778	0.749427	0.423177	0.598367	0.717231	0.661372	0.783097	0.578459	0.421541	0.216903	0.282769	0.338628	3.12	0.999338	1942.16	2130	839.72	589.98	1152.18
PCC	Standard Pearson without IOI	PCCnIOI	65535	ü	ü	72	0.385126	0.37336	0.379196	0.748656	0.731594	1.08242	1.04032	0.299876	0.299876	0.547575	0.416462	0.700124	0.68668	0.749063	0.418366	0.598322	0.725163	0.659963	0.773778	0.599581	0.400419	0.226222	0.274837	0.340037	3.12	0.999338	1962.32	2104.64	797.64	615.34	1194.26
PCC	Standard Pearson without IOI	PCCnIOI	65535	ü	ü	73	0.384868	0.373145	0.37896	0.748534	0.731933	1.0833	1.04074	0.299995	0.299995	0.547684	0.416305	0.700005	0.686573	0.748939	0.418402	0.598167	0.725104	0.659764	0.773586	0.599559	0.400441	0.226414	0.274896	0.340236	3.12	0.999338	1961.58	2104.12	797.68	615.86	1194.22
PCC	Standard Pearson without IOI	PCCnIOI	65535	ü	ü	74	0.384819	0.373061	0.378893	0.748534	0.7324	1.08468	1.04141	0.30002	0.30002	0.547707	0.416106	0.69998	0.68653	0.748941	0.418437	0.598167	0.725045	0.659774	0.773651	0.59941	0.40059	0.226349	0.274955	0.340226	3.12	0.999338	1960.64	2104.3	797.98	615.68	1193.92
COS	Cosine without IOI	COSnIOI	65535	ü	ü	56	0.378142	0.361287	0.369617	0.748438	0.72754	1.04523	1.02231	0.30362	0.30362	0.550985	0.412128	0.69638	0.680644	0.749162	0.423183	0.598045	0.717223	0.66092	0.782552	0.578735	0.421265	0.217448	0.282777	0.33908	3.12	0.999338	1941.9	2128.52	839.16	591.46	1152.74
PCC	Standard Pearson without IOI	PCCnIOI	65535	ü	ü	75	0.384597	0.372902	0.378703	0.748416	0.732561	1.08552	1.04181	0.300122	0.300122	0.547801	0.416152	0.699878	0.686451	0.74882	0.418454	0.598015	0.725019	0.659578	0.77343	0.599472	0.400528	0.22657	0.274981	0.340422	3.12	0.999338	1960.86	2103.7	797.86	616.28	1194.04
COS	Cosine without IOI	COSnIOI	65535	ü	ü	57	0.378192	0.361449	0.369724	0.748412	0.727429	1.04486	1.02213	0.303586	0.303586	0.550954	0.412137	0.696414	0.680725	0.749129	0.423108	0.598011	0.717346	0.660846	0.782349	0.5791	0.4209	0.217651	0.282654	0.339154	3.12	0.999338	1941.94	2127.96	838.44	592.02	1153.46
JAC	Jaccard without IOI	JACnIOI	65535	ü	ü	29	0.379024	0.362988	0.370918	0.748398	0.726487	1.04198	1.02073	0.303127	0.303127	0.550541	0.412425	0.696873	0.681494	0.749068	0.422499	0.597991	0.718361	0.660663	0.781118	0.58187	0.41813	0.218882	0.281639	0.339337	3.12	0.999338	1943.3	2124.6	832.92	595.38	1158.98
JAC	Jaccard without IOI	JACnIOI	65535	ü	ü	32	0.379326	0.363536	0.371345	0.748395	0.725999	1.04078	1.02013	0.302962	0.302962	0.55039	0.412676	0.697038	0.681768	0.74905	0.422279	0.597989	0.718722	0.660603	0.780687	0.582849	0.417151	0.219313	0.281278	0.339397	3.12	0.999338	1944.48	2123.44	830.98	596.54	1160.92
JAC	Jaccard without IOI	JACnIOI	65535	ü	ü	28	0.378866	0.362757	0.370722	0.748374	0.726929	1.04275	1.0211	0.303208	0.303208	0.550613	0.412065	0.696792	0.681379	0.749049	0.422581	0.59796	0.718226	0.660639	0.781223	0.581535	0.418465	0.218777	0.281774	0.339361	3.12	0.999338	1941.6	2124.88	833.58	595.1	1158.32
COS	Cosine without IOI	COSnIOI	65535	ü	ü	9	0.366874	0.339249	0.352789	0.74837	0.748932	1.10846	1.05277	0.310313	0.310313	0.55703	0.407124	0.689687	0.669624	0.749916	0.431389	0.597952	0.703435	0.66344	0.799494	0.539755	0.460245	0.200506	0.296565	0.33656	3.12	0.999338	1918.32	2174.6	916.78	545.38	1075.12
PCC	Standard Pearson without IOI	PCCnIOI	65535	ü	ü	76	0.384291	0.3726	0.378399	0.748296	0.732735	1.08603	1.04206	0.300267	0.300267	0.547932	0.41611	0.699733	0.6863	0.748701	0.418528	0.597863	0.724898	0.659393	0.773312	0.599288	0.400712	0.226688	0.275102	0.340607	3.12	0.999338	1960.66	2103.38	798.22	616.6	1193.68
COS	Cosine without IOI	COSnIOI	65535	ü	ü	58	0.377975	0.361312	0.369548	0.748295	0.727548	1.04505	1.02222	0.303679	0.303679	0.551037	0.412048	0.696321	0.680656	0.749007	0.423117	0.597864	0.71733	0.660645	0.782111	0.579201	0.420799	0.217889	0.28267	0.339355	3.12	0.999338	1941.52	2127.32	838.24	592.66	1153.66
COS	Cosine without IOI	COSnIOI	65535	ü	ü	59	0.377986	0.361345	0.36957	0.748294	0.727569	1.04489	1.02214	0.303671	0.303671	0.55103	0.411925	0.696329	0.680672	0.749005	0.423104	0.597862	0.717351	0.660635	0.782082	0.579263	0.420737	0.217918	0.282649	0.339365	3.12	0.999338	1940.94	2127.24	838.12	592.74	1153.78
JAC	Jaccard without IOI	JACnIOI	65535	ü	ü	30	0.378903	0.363027	0.370878	0.748279	0.726644	1.04183	1.02065	0.30317	0.30317	0.55058	0.412149	0.69683	0.681514	0.74894	0.422434	0.597839	0.718469	0.660434	0.780735	0.582292	0.417708	0.219265	0.281531	0.339566	3.12	0.999338	1942	2123.56	832.08	596.42	1159.82
JAC	Jaccard without IOI	JACnIOI	65535	ü	ü	36	0.379314	0.363863	0.371507	0.74824	0.725405	1.03949	1.01951	0.302936	0.302936	0.550365	0.412901	0.697064	0.681932	0.748873	0.422087	0.597792	0.719039	0.660275	0.779975	0.583888	0.416112	0.220025	0.280961	0.339725	3.12	0.999338	1945.54	2121.5	828.92	598.48	1162.98
COS	Cosine without IOI	COSnIOI	65535	ü	ü	60	0.377905	0.361334	0.369525	0.748234	0.727476	1.04432	1.02186	0.3037	0.3037	0.551057	0.411844	0.6963	0.680667	0.74894	0.423085	0.597786	0.717383	0.660522	0.781911	0.579423	0.420577	0.218089	0.282617	0.339478	3.12	0.999338	1940.56	2126.78	837.8	593.2	1154.1
JAC	Jaccard without IOI	JACnIOI	65535	ü	ü	34	0.379064	0.363434	0.371165	0.748226	0.725541	1.03973	1.01962	0.303072	0.303072	0.55049	0.412803	0.696928	0.681717	0.748871	0.422252	0.597772	0.718769	0.660295	0.780265	0.583169	0.416831	0.219735	0.281231	0.339705	3.12	0.999338	1945.08	2122.28	830.34	597.7	1161.56
PCC	Standard Pearson without IOI	PCCnIOI	65535	ü	ü	77	0.384129	0.372489	0.378263	0.74821	0.733118	1.08736	1.04269	0.300339	0.300339	0.547998	0.416012	0.699661	0.686244	0.748611	0.418536	0.597754	0.724884	0.659245	0.773142	0.599347	0.400653	0.226858	0.275116	0.340755	3.12	0.999338	1960.2	2102.92	798.1	617.06	1193.8
PCC	Standard Pearson without IOI	PCCnIOI	65535	ü	ü	78	0.384177	0.372585	0.378335	0.748203	0.73316	1.08807	1.04303	0.300313	0.300313	0.547974	0.416135	0.699687	0.686292	0.748601	0.418494	0.597745	0.724954	0.659223	0.773047	0.599538	0.400462	0.226953	0.275046	0.340777	3.12	0.999338	1960.78	2102.66	797.72	617.32	1194.18
COS	Cosine without IOI	COSnIOI	65535	ü	ü	61	0.377891	0.361372	0.369538	0.748202	0.727438	1.04448	1.02194	0.303705	0.303705	0.55106	0.41195	0.696295	0.680686	0.748905	0.423057	0.597746	0.717429	0.660462	0.781789	0.579584	0.420416	0.218211	0.282571	0.339538	3.12	0.999338	1941.06	2126.44	837.48	593.54	1154.42
JAC	Jaccard without IOI	JACnIOI	65535	ü	ü	33	0.37894	0.363295	0.371033	0.748188	0.725969	1.04038	1.01994	0.303132	0.303132	0.550542	0.412455	0.696868	0.681647	0.748834	0.422293	0.597726	0.718698	0.660241	0.780263	0.583032	0.416968	0.219737	0.281302	0.339759	3.12	0.999338	1943.44	2122.28	830.62	597.7	1161.28
JAC	Jaccard without IOI	JACnIOI	65535	ü	ü	25	0.377943	0.361501	0.369629	0.748171	0.72754	1.04526	1.02232	0.303679	0.303679	0.551037	0.412425	0.696321	0.680751	0.748869	0.422999	0.597706	0.717532	0.660411	0.781604	0.579897	0.420103	0.218396	0.282468	0.339589	3.12	0.999338	1943.3	2125.92	836.84	594.06	1155.06
JAC	Jaccard without IOI	JACnIOI	65535	ü	ü	31	0.378618	0.362758	0.370601	0.748166	0.726339	1.04153	1.02051	0.303301	0.303301	0.550699	0.412506	0.696699	0.681379	0.748826	0.422496	0.597695	0.718365	0.660252	0.780607	0.582151	0.417849	0.219393	0.281635	0.339748	3.12	0.999338	1943.68	2123.22	832.36	596.76	1159.54
JAC	Jaccard without IOI	JACnIOI	65535	ü	ü	26	0.3779	0.361514	0.369615	0.748138	0.727404	1.04475	1.02208	0.303692	0.303692	0.551053	0.412353	0.696308	0.680757	0.748833	0.422979	0.597659	0.717566	0.660334	0.781493	0.580021	0.419979	0.218507	0.282434	0.339666	3.12	0.999338	1942.96	2125.62	836.6	594.36	1155.3
COS	Cosine without IOI	COSnIOI	65535	ü	ü	62	0.377863	0.361482	0.36958	0.748132	0.727421	1.0442	1.02181	0.303705	0.303705	0.551059	0.411891	0.696295	0.680741	0.748827	0.422985	0.597657	0.717548	0.660315	0.781496	0.579986	0.420014	0.218504	0.282452	0.339685	3.12	0.999338	1940.78	2125.64	836.68	594.34	1155.22
JAC	Jaccard without IOI	JACnIOI	65535	ü	ü	35	0.378949	0.363435	0.37111	0.748128	0.725727	1.03984	1.01968	0.303114	0.303114	0.550527	0.412608	0.696886	0.681718	0.748766	0.422213	0.59765	0.718832	0.660117	0.779976	0.583459	0.416541	0.220024	0.281168	0.339883	3.12	0.999338	1944.16	2121.5	829.76	598.48	1162.14
JAC	Jaccard without IOI	JACnIOI	65535	ü	ü	27	0.377723	0.361382	0.36946	0.748052	0.727676	1.04466	1.02203	0.303773	0.303773	0.551126	0.411903	0.696227	0.680691	0.748745	0.422997	0.59755	0.717533	0.66019	0.781345	0.580037	0.419963	0.218655	0.282467	0.33981	3.12	0.999338	1940.84	2125.22	836.58	594.76	1155.32
PCC	Standard Pearson without IOI	PCCnIOI	65535	ü	ü	79	0.383801	0.372263	0.377987	0.748035	0.733241	1.08824	1.04311	0.300487	0.300487	0.548133	0.416101	0.699513	0.686132	0.748432	0.418553	0.59753	0.724854	0.658947	0.772804	0.59946	0.40054	0.227196	0.275146	0.341053	3.12	0.999338	1960.62	2102	797.88	617.98	1194.02
JAC	Jaccard without IOI	JACnIOI	65535	ü	ü	39	0.379123	0.363985	0.371475	0.748023	0.725532	1.03943	1.01947	0.302996	0.302996	0.55042	0.412676	0.697004	0.681993	0.748637	0.421948	0.597515	0.719267	0.659856	0.779235	0.58475	0.41525	0.220765	0.280733	0.340144	3.12	0.999338	1944.48	2119.5	827.2	600.48	1164.7
COS	Cosine without IOI	COSnIOI	65535	ü	ü	64	0.377732	0.36152	0.369535	0.748014	0.727217	1.04391	1.02167	0.303747	0.303747	0.551098	0.412039	0.696253	0.68076	0.748698	0.422922	0.597505	0.717653	0.660079	0.781113	0.580407	0.419593	0.218887	0.282347	0.339921	3.12	0.999338	1941.48	2124.6	835.84	595.38	1156.06
JAC	Jaccard without IOI	JACnIOI	65535	ü	ü	23	0.377136	0.360423	0.368683	0.747991	0.728164	1.04602	1.0227	0.304087	0.304087	0.551405	0.412009	0.695913	0.680211	0.748708	0.423353	0.597479	0.716942	0.660194	0.78191	0.578512	0.421488	0.21809	0.283058	0.339806	3.12	0.999338	1941.34	2126.76	839.6	593.22	1152.3
JAC	Jaccard without IOI	JACnIOI	65535	ü	ü	38	0.378987	0.363811	0.371319	0.747987	0.725668	1.03967	1.0196	0.303064	0.303064	0.550483	0.412578	0.696936	0.681905	0.748604	0.422005	0.597469	0.719177	0.65981	0.779265	0.584546	0.415454	0.220735	0.280823	0.34019	3.12	0.999338	1944.02	2119.58	827.6	600.4	1164.3
JAC	Jaccard without IOI	JACnIOI	65535	ü	ü	37	0.378816	0.363588	0.371122	0.747954	0.725855	1.0405	1.02	0.303148	0.303148	0.550561	0.41268	0.696852	0.681794	0.748574	0.422081	0.597424	0.719053	0.659763	0.779336	0.584252	0.415748	0.220664	0.280947	0.340237	3.12	0.999338	1944.5	2119.76	828.18	600.22	1163.72
JAC	Jaccard without IOI	JACnIOI	65535	ü	ü	24	0.377225	0.360698	0.368867	0.747951	0.727773	1.04542	1.0224	0.304023	0.304023	0.55135	0.412226	0.695977	0.680349	0.748656	0.423228	0.597425	0.717151	0.660074	0.781573	0.579125	0.420875	0.218427	0.282849	0.339926	3.12	0.999338	1942.36	2125.84	838.38	594.14	1153.52
JAC	Jaccard without IOI	JACnIOI	65535	ü	ü	18	0.376787	0.359915	0.368253	0.74794	0.729433	1.05009	1.02468	0.304261	0.304261	0.551567	0.411789	0.695739	0.679958	0.748669	0.423527	0.59741	0.716652	0.660135	0.782144	0.577772	0.422228	0.217856	0.283348	0.339865	3.12	0.999338	1940.3	2127.42	841.08	592.56	1150.82
COS	Cosine without IOI	COSnIOI	65535	ü	ü	63	0.377473	0.361218	0.369254	0.747936	0.727514	1.04425	1.02183	0.303874	0.303874	0.551212	0.41178	0.696126	0.680609	0.748624	0.42301	0.597408	0.717505	0.659968	0.78112	0.580097	0.419903	0.21888	0.282495	0.340032	3.12	0.999338	1940.26	2124.62	836.46	595.36	1155.44
COS	Cosine without IOI	COSnIOI	65535	ü	ü	65	0.377752	0.361734	0.369655	0.747934	0.727128	1.04348	1.02145	0.303717	0.303717	0.551071	0.412014	0.696283	0.680867	0.748606	0.422804	0.597404	0.717848	0.659904	0.780708	0.581027	0.418973	0.219292	0.282152	0.340096	3.12	0.999338	1941.36	2123.5	834.6	596.48	1157.3
PCC	Standard Pearson without IOI	PCCnIOI	65535	ü	ü	80	0.383523	0.371975	0.377703	0.747929	0.733661	1.08932	1.04363	0.300623	0.300623	0.548258	0.415851	0.699377	0.685987	0.748327	0.418631	0.597395	0.724727	0.658796	0.772723	0.599252	0.400748	0.227277	0.275273	0.341204	3.12	0.999338	1959.44	2101.78	798.3	618.2	1193.6
JAC	Jaccard without IOI	JACnIOI	65535	ü	ü	40	0.378765	0.363651	0.371129	0.747879	0.725693	1.03978	1.01965	0.303161	0.303161	0.55057	0.412625	0.696839	0.681825	0.748491	0.422024	0.597332	0.719144	0.659621	0.779066	0.584585	0.415415	0.220934	0.280856	0.340379	3.12	0.999338	1944.24	2119.04	827.52	600.94	1164.38
JAC	Jaccard without IOI	JACnIOI	65535	ü	ü	45	0.379092	0.364304	0.371623	0.747849	0.72504	1.03829	1.01892	0.302979	0.302979	0.550404	0.412973	0.697021	0.682152	0.748442	0.42175	0.597294	0.719597	0.659495	0.778473	0.585831	0.414169	0.221527	0.280403	0.340505	3.12	0.999338	1945.88	2117.42	825.04	602.56	1166.86
JAC	Jaccard without IOI	JACnIOI	65535	ü	ü	44	0.379025	0.364183	0.371528	0.747849	0.725052	1.03842	1.01898	0.303017	0.303017	0.55044	0.413033	0.696983	0.682091	0.748445	0.421801	0.597292	0.719514	0.659512	0.77857	0.585613	0.414387	0.22143	0.280486	0.340488	3.12	0.999338	1946.16	2117.68	825.48	602.3	1166.42
JAC	Jaccard without IOI	JACnIOI	65535	ü	ü	19	0.376661	0.359919	0.368193	0.747828	0.729293	1.04927	1.02428	0.304312	0.304312	0.551613	0.4117	0.695688	0.679959	0.748548	0.423485	0.597269	0.716719	0.659942	0.781819	0.5781	0.4219	0.218181	0.283281	0.340058	3.12	0.999338	1939.88	2126.54	840.44	593.44	1151.46
JAC	Jaccard without IOI	JACnIOI	65535	ü	ü	41	0.378575	0.363509	0.370964	0.747787	0.725651	1.03975	1.01963	0.303246	0.303246	0.550648	0.412655	0.696754	0.681755	0.748398	0.422043	0.597214	0.719112	0.659463	0.778904	0.584605	0.415395	0.221096	0.280888	0.340537	3.12	0.999338	1944.38	2118.6	827.48	601.38	1164.42
COS	Cosine without IOI	COSnIOI	65535	ü	ü	66	0.377451	0.361538	0.369407	0.747778	0.727264	1.04366	1.02154	0.303849	0.303849	0.55119	0.411895	0.696151	0.680769	0.748444	0.42282	0.597206	0.717821	0.659631	0.780399	0.581139	0.418861	0.219601	0.282179	0.340369	3.12	0.999338	1940.8	2122.66	834.38	597.32	1157.52
JAC	Jaccard without IOI	JACnIOI	65535	ü	ü	43	0.378712	0.363801	0.37118	0.747766	0.725494	1.03888	1.01921	0.303165	0.303165	0.550574	0.412591	0.696835	0.681901	0.748366	0.421917	0.597188	0.719323	0.65939	0.77861	0.585191	0.414809	0.22139	0.280677	0.34061	3.12	0.999338	1944.08	2117.8	826.3	602.18	1165.6
PCC	Standard Pearson without IOI	PCCnIOI	65535	ü	ü	81	0.383176	0.371699	0.377392	0.747758	0.73403	1.08998	1.04395	0.300784	0.300784	0.548405	0.415617	0.699216	0.685849	0.748152	0.418673	0.597176	0.724658	0.658518	0.772436	0.599262	0.400738	0.227564	0.275342	0.341482	3.12	0.999338	1958.34	2101	798.28	618.98	1193.62
JAC	Jaccard without IOI	JACnIOI	65535	ü	ü	20	0.376506	0.359813	0.368063	0.747744	0.728941	1.04902	1.02416	0.304384	0.304384	0.551678	0.412103	0.695616	0.679906	0.748462	0.423494	0.597162	0.716706	0.6598	0.781656	0.578156	0.421844	0.218344	0.283294	0.3402	3.12	0.999338	1941.78	2126.08	840.32	593.9	1151.58
JAC	Jaccard without IOI	JACnIOI	65535	ü	ü	42	0.378624	0.36371	0.371091	0.747736	0.725489	1.03931	1.01942	0.303208	0.303208	0.550612	0.412748	0.696792	0.681855	0.748336	0.421943	0.597149	0.719279	0.659345	0.778594	0.585116	0.414884	0.221406	0.280721	0.340655	3.12	0.999338	1944.82	2117.76	826.46	602.22	1165.44
PCC	Standard Pearson without IOI	PCCnIOI	65535	ü	ü	82	0.383236	0.371851	0.377499	0.74773	0.734081	1.08978	1.04385	0.30075	0.30075	0.548375	0.415507	0.69925	0.685926	0.74812	0.418599	0.59714	0.724781	0.658455	0.772237	0.599614	0.400386	0.227763	0.275219	0.341545	3.12	0.999338	1957.82	2100.46	797.58	619.52	1194.32
JAC	Jaccard without IOI	JACnIOI	65535	ü	ü	22	0.376449	0.359817	0.368037	0.747701	0.728605	1.04763	1.02349	0.304401	0.304401	0.551693	0.412039	0.695599	0.679909	0.748414	0.423476	0.597106	0.716739	0.65971	0.781517	0.5783	0.4217	0.218483	0.283261	0.34029	3.12	0.999338	1941.48	2125.7	840.02	594.28	1151.88
PCC	Standard Pearson without IOI	PCCnIOI	65535	ü	ü	84	0.383038	0.371574	0.377261	0.747694	0.734246	1.09035	1.04413	0.300852	0.300852	0.548468	0.415622	0.699148	0.685787	0.748089	0.418701	0.597094	0.724615	0.658423	0.772352	0.599222	0.400778	0.227648	0.275385	0.341577	3.12	0.999338	1958.36	2100.76	798.36	619.22	1193.54
COS	Cosine without IOI	COSnIOI	65535	ü	ü	67	0.377307	0.361493	0.369314	0.747679	0.727132	1.04333	1.02138	0.303908	0.303908	0.551244	0.41195	0.696092	0.680746	0.748339	0.422798	0.597079	0.717857	0.65945	0.780142	0.581351	0.418649	0.219858	0.282143	0.34055	3.12	0.999338	1941.06	2121.96	833.96	598.02	1157.94
PCC	Standard Pearson without IOI	PCCnIOI	65535	ü	ü	83	0.382996	0.371589	0.377248	0.74765	0.734208	1.09009	1.04401	0.300865	0.300865	0.548479	0.41549	0.699135	0.685795	0.748041	0.418674	0.597039	0.724657	0.658339	0.772207	0.599382	0.400618	0.227793	0.275343	0.341661	3.12	0.999338	1957.74	2100.38	798.04	619.6	1193.86
JAC	Jaccard without IOI	JACnIOI	65535	ü	ü	46	0.378507	0.363744	0.371051	0.74763	0.725311	1.03865	1.01909	0.30325	0.30325	0.550651	0.412795	0.69675	0.681872	0.748222	0.421884	0.597013	0.719376	0.659131	0.778255	0.585489	0.414511	0.221745	0.280624	0.340869	3.12	0.999338	1945.04	2116.82	825.72	603.16	1166.18
COS	Cosine without IOI	COSnIOI	65535	ü	ü	68	0.377261	0.361498	0.369294	0.74763	0.727285	1.04374	1.02158	0.30393	0.30393	0.551263	0.411895	0.69607	0.680749	0.748287	0.422779	0.597018	0.717888	0.659373	0.780001	0.581497	0.418503	0.219999	0.282112	0.340627	3.12	0.999338	1940.8	2121.58	833.68	598.4	1158.22
JAC	Jaccard without IOI	JACnIOI	65535	ü	ü	21	0.376159	0.359455	0.36771	0.747617	0.729102	1.04874	1.02402	0.304549	0.304549	0.551824	0.41178	0.695451	0.679728	0.748336	0.423583	0.597003	0.716558	0.659601	0.781555	0.5779	0.4221	0.218445	0.283442	0.340399	3.12	0.999338	1940.26	2125.8	840.82	594.18	1151.08
PCC	Standard Pearson without IOI	PCCnIOI	65535	ü	ü	86	0.38275	0.371274	0.376967	0.747591	0.734756	1.09209	1.04497	0.300988	0.300988	0.548594	0.41549	0.699012	0.685637	0.747987	0.418781	0.596961	0.724486	0.658263	0.772278	0.598996	0.401004	0.227722	0.275514	0.341737	3.12	0.999338	1957.74	2100.56	798.8	619.42	1193.1
JAC	Jaccard without IOI	JACnIOI	65535	ü	ü	47	0.378432	0.363807	0.371046	0.747547	0.72529	1.03873	1.01913	0.303267	0.303267	0.550669	0.412829	0.696733	0.681904	0.748131	0.421824	0.596904	0.719477	0.658955	0.777951	0.585856	0.414144	0.222049	0.280523	0.341045	3.12	0.999338	1945.2	2116	824.98	603.98	1166.92
PCC	Standard Pearson without IOI	PCCnIOI	65535	ü	ü	91	0.382626	0.371177	0.376857	0.747531	0.735609	1.0957	1.04669	0.301043	0.301043	0.548644	0.415456	0.698957	0.685589	0.747925	0.418797	0.596885	0.724462	0.658164	0.772174	0.599003	0.400997	0.227826	0.275538	0.341836	3.12	0.999338	1957.58	2100.28	798.78	619.7	1193.12
PCC	Standard Pearson without IOI	PCCnIOI	65535	ü	ü	85	0.382651	0.371219	0.37689	0.747527	0.734637	1.09136	1.04461	0.301035	0.301035	0.548634	0.415401	0.698965	0.685609	0.747921	0.418777	0.596881	0.72449	0.658161	0.772138	0.59908	0.40092	0.227862	0.27551	0.341839	3.12	0.999338	1957.32	2100.18	798.64	619.8	1193.26
COS	Cosine without IOI	COSnIOI	65535	ü	ü	69	0.37701	0.361318	0.369079	0.747508	0.727417	1.04362	1.02152	0.30404	0.30404	0.551363	0.4117	0.69596	0.680659	0.748161	0.422802	0.596862	0.717849	0.659161	0.77978	0.581538	0.418462	0.22022	0.282151	0.340839	3.12	0.999338	1939.88	2120.98	833.6	599	1158.3
PCC	Standard Pearson without IOI	PCCnIOI	65535	ü	ü	89	0.382557	0.371125	0.376796	0.747503	0.735418	1.09464	1.04619	0.301073	0.301073	0.548671	0.415371	0.698927	0.685562	0.747896	0.418804	0.596848	0.724449	0.658109	0.77213	0.598995	0.401005	0.22787	0.275551	0.341891	3.12	0.999338	1957.18	2100.16	798.8	619.82	1193.1
JAC	Jaccard without IOI	JACnIOI	65535	ü	ü	48	0.37839	0.363824	0.371034	0.747502	0.725507	1.03868	1.01911	0.303284	0.303284	0.550685	0.412557	0.696716	0.681912	0.748082	0.421799	0.596845	0.719519	0.658871	0.777807	0.586018	0.413982	0.222193	0.280481	0.341129	3.12	0.999338	1943.92	2115.6	824.66	604.38	1167.24
PCC	Standard Pearson without IOI	PCCnIOI	65535	ü	ü	92	0.382492	0.371033	0.376718	0.747488	0.735724	1.09589	1.04678	0.301107	0.301107	0.548701	0.415388	0.698893	0.685516	0.747883	0.418838	0.59683	0.724394	0.658098	0.77216	0.598873	0.401127	0.22784	0.275606	0.341902	3.12	0.999338	1957.26	2100.24	799.04	619.74	1192.86
PCC	Standard Pearson without IOI	PCCnIOI	65535	ü	ü	90	0.382456	0.370979	0.376672	0.747487	0.735477	1.09506	1.04639	0.301124	0.301124	0.548718	0.415414	0.698876	0.685489	0.747882	0.418859	0.596827	0.72436	0.658097	0.772196	0.598783	0.401217	0.227804	0.27564	0.341903	3.12	0.999338	1957.38	2100.34	799.22	619.64	1192.68
PCC	Standard Pearson without IOI	PCCnIOI	65535	ü	ü	88	0.382518	0.371081	0.376755	0.747485	0.735248	1.09386	1.04581	0.301094	0.301094	0.548691	0.41535	0.698906	0.68554	0.747878	0.418816	0.596825	0.724429	0.658089	0.772115	0.598966	0.401034	0.227885	0.275571	0.341911	3.12	0.999338	1957.08	2100.12	798.86	619.86	1193.04
PCC	Standard Pearson without IOI	PCCnIOI	65535	ü	ü	87	0.382487	0.371037	0.376717	0.747477	0.734985	1.09308	1.04544	0.301111	0.301111	0.548707	0.415482	0.698889	0.685519	0.747871	0.418831	0.596814	0.724407	0.65808	0.772124	0.598914	0.401086	0.227876	0.275593	0.34192	3.12	0.999338	1957.7	2100.14	798.96	619.84	1192.94
COS	Cosine without IOI	COSnIOI	65535	ü	ü	70	0.376925	0.361316	0.369037	0.747438	0.727451	1.04383	1.02163	0.304074	0.304074	0.551396	0.411725	0.695926	0.680658	0.748086	0.422776	0.596771	0.717893	0.659032	0.779576	0.58174	0.41826	0.220424	0.282107	0.340968	3.12	0.999338	1940	2120.42	833.2	599.56	1158.7
JAC	Jaccard without IOI	JACnIOI	65535	ü	ü	17	0.375457	0.358621	0.366941	0.747431	0.730596	1.05262	1.02592	0.304885	0.304885	0.552131	0.411224	0.695115	0.67931	0.74816	0.423833	0.596762	0.716142	0.659315	0.781637	0.576983	0.423017	0.218363	0.283858	0.340685	3.12	0.999338	1937.64	2126.04	842.64	593.94	1149.26
PCC	Standard Pearson without IOI	PCCnIOI	65535	ü	ü	93	0.382344	0.370917	0.376586	0.747413	0.735944	1.09629	1.04698	0.301175	0.301175	0.548765	0.415261	0.698825	0.685458	0.747805	0.418854	0.596733	0.724369	0.657975	0.772026	0.59889	0.40111	0.227974	0.275631	0.342025	3.12	0.999338	1956.66	2099.88	799	620.1	1192.9
PCC	Standard Pearson without IOI	PCCnIOI	65535	ü	ü	94	0.382285	0.370825	0.37651	0.747409	0.735927	1.09642	1.04703	0.301205	0.301205	0.548791	0.415282	0.698795	0.685413	0.747804	0.41889	0.596729	0.72431	0.657975	0.772086	0.598739	0.401261	0.227914	0.27569	0.342025	3.12	0.999338	1956.76	2100.04	799.3	619.94	1192.6
JAC	Jaccard without IOI	JACnIOI	65535	ü	ü	49	0.378103	0.363605	0.370782	0.747361	0.725651	1.03899	1.01926	0.303416	0.303416	0.550803	0.412553	0.696584	0.681802	0.747938	0.421831	0.596668	0.719465	0.658638	0.777565	0.58604	0.41396	0.222435	0.280535	0.341362	3.12	0.999338	1943.9	2114.94	824.62	605.04	1167.28
COS	Cosine without IOI	COSnIOI	65535	ü	ü	71	0.376826	0.361335	0.368998	0.747345	0.727578	1.04387	1.02164	0.304108	0.304108	0.551425	0.411564	0.695892	0.680667	0.747986	0.422732	0.596655	0.717966	0.65886	0.779287	0.582048	0.417952	0.220713	0.282034	0.34114	3.12	0.999338	1939.24	2119.64	832.58	600.34	1159.32
JAC	Jaccard without IOI	JACnIOI	65535	ü	ü	50	0.378115	0.363782	0.370878	0.747288	0.725485	1.03844	1.01899	0.303395	0.303395	0.550784	0.412544	0.696605	0.681891	0.747855	0.421731	0.596575	0.719632	0.658483	0.777211	0.58657	0.41343	0.222789	0.280368	0.341517	3.12	0.999338	1943.86	2113.98	823.56	606	1168.34
JAC	Jaccard without IOI	JACnIOI	65535	ü	ü	51	0.378231	0.364014	0.371053	0.747273	0.725396	1.03838	1.01896	0.303331	0.303331	0.550725	0.412578	0.696669	0.682007	0.747832	0.42163	0.596557	0.719795	0.658436	0.776989	0.587026	0.412974	0.223011	0.280205	0.341564	3.12	0.999338	1944.02	2113.38	822.66	606.6	1169.24
MRC	Median-Based Robust without IOI	MRCnIOI	65535	ü	ü	27	0.382656	0.371729	0.377151	0.747238	0.731863	1.07237	1.03547	0.300999	0.300999	0.548606	0.413872	0.699001	0.685864	0.747602	0.418441	0.596509	0.725057	0.657599	0.770876	0.600853	0.399147	0.229124	0.274943	0.342401	3.16	0.99933	1950.1	2096.74	795.04	623.22	1196.84
COS	Cosine without IOI	COSnIOI	65535	ü	ü	73	0.376796	0.361511	0.369073	0.747235	0.727536	1.04383	1.02162	0.304104	0.304104	0.55142	0.411589	0.695896	0.680756	0.747862	0.422618	0.596516	0.718156	0.65864	0.778823	0.582688	0.417312	0.221177	0.281844	0.34136	3.12	0.999338	1939.36	2118.38	831.3	601.6	1160.6
JAC	Jaccard without IOI	JACnIOI	65535	ü	ü	52	0.378031	0.363779	0.370835	0.747217	0.725604	1.03863	1.01908	0.303429	0.303429	0.550814	0.412379	0.696571	0.681889	0.747779	0.421702	0.596486	0.719674	0.658356	0.777008	0.586771	0.413229	0.222992	0.280326	0.341644	3.12	0.999338	1943.08	2113.44	823.18	606.54	1168.72
COS	Cosine without IOI	COSnIOI	65535	ü	ü	74	0.376751	0.361476	0.369033	0.747214	0.727557	1.0435	1.02146	0.304125	0.304125	0.551439	0.411441	0.695875	0.680738	0.74784	0.422623	0.596488	0.718148	0.658603	0.778788	0.582688	0.417312	0.221212	0.281852	0.341397	3.12	0.999338	1938.66	2118.28	831.3	601.7	1160.6
COS	Cosine without IOI	COSnIOI	65535	ü	ü	72	0.376653	0.361325	0.368908	0.747203	0.727612	1.04383	1.02163	0.304176	0.304176	0.551486	0.411517	0.695824	0.680662	0.747833	0.422679	0.596474	0.718054	0.6586	0.778875	0.58245	0.41755	0.221125	0.281946	0.3414	3.12	0.999338	1939.02	2118.52	831.78	601.46	1160.12
PCC	Standard Pearson without IOI	PCCnIOI	65535	ü	ü	95	0.381639	0.370126	0.375837	0.747194	0.736369	1.09767	1.04763	0.301514	0.301514	0.549071	0.415087	0.698486	0.685063	0.747592	0.419088	0.596456	0.723983	0.657656	0.771998	0.598128	0.401872	0.228002	0.276017	0.342344	3.12	0.999338	1955.84	2099.8	800.52	620.18	1191.38
PCC	Standard Pearson without IOI	PCCnIOI	65535	ü	ü	97	0.381583	0.370086	0.375789	0.747163	0.736738	1.09858	1.04807	0.30154	0.30154	0.549095	0.414908	0.69846	0.685043	0.747561	0.419092	0.596417	0.723978	0.657606	0.771939	0.598147	0.401853	0.228061	0.276022	0.342394	3.12	0.999338	1955	2099.64	800.48	620.34	1191.42
PCC	Standard Pearson without IOI	PCCnIOI	65535	ü	ü	96	0.381528	0.370036	0.375737	0.74714	0.736624	1.09814	1.04786	0.301565	0.301565	0.549118	0.414925	0.698435	0.685018	0.747537	0.419103	0.596387	0.72396	0.657569	0.771909	0.598127	0.401873	0.228091	0.27604	0.342431	3.12	0.999338	1955.08	2099.56	800.52	620.42	1191.38
MRC	Median-Based Robust without IOI	MRCnIOI	65535	ü	ü	28	0.382594	0.371822	0.377168	0.747133	0.73216	1.07269	1.03563	0.30102	0.30102	0.548626	0.413533	0.69898	0.685911	0.74749	0.418354	0.596375	0.725196	0.657398	0.7705	0.601322	0.398678	0.2295	0.274804	0.342602	3.16	0.99933	1948.5	2095.72	794.12	624.24	1197.76
PCC	Standard Pearson without IOI	PCCnIOI	65535	ü	ü	99	0.381475	0.369969	0.375677	0.747129	0.737129	1.10002	1.04875	0.301591	0.301591	0.54914	0.414828	0.698409	0.684985	0.747527	0.419123	0.596373	0.723926	0.65755	0.771926	0.598043	0.401957	0.228074	0.276074	0.34245	3.12	0.999338	1954.62	2099.6	800.68	620.38	1191.22
JAC	Jaccard without IOI	JACnIOI	65535	ü	ü	15	0.374549	0.35767	0.366011	0.747119	0.732599	1.0568	1.02795	0.305318	0.305318	0.552524	0.40996	0.694682	0.678835	0.747854	0.424083	0.596364	0.715729	0.65882	0.781451	0.576219	0.423781	0.218549	0.284271	0.34118	3.12	0.999338	1931.68	2125.52	844.16	594.46	1147.74
COS	Cosine without IOI	COSnIOI	65535	ü	ü	75	0.376568	0.361359	0.368884	0.747113	0.727811	1.04396	1.02169	0.304205	0.304205	0.551513	0.411246	0.695795	0.68068	0.747736	0.422629	0.59636	0.718138	0.658429	0.778582	0.582778	0.417222	0.221418	0.281862	0.341571	3.12	0.999338	1937.74	2117.72	831.12	602.26	1160.78
MRC	Median-Based Robust without IOI	MRCnIOI	-1	ü		42	0.36222	0.358085	0.360146	0.734568	0.753638	1.12053	1.05849	0.31077	0.31077	0.557442	0.401015	0.68923	0.679043	0.734653	0.418817	0.580523	0.724434	0.637786	0.745042	0.613044	0.386956	0.254958	0.275566	0.362214	3.16	0.99933	1889.52	2026.46	770.8	693.5	1221.08
MRC	Median-Based Robust without IOI	MRCnIOI	-1	ü		32	0.362782	0.359013	0.360892	0.734477	0.749682	1.10447	1.05088	0.310524	0.310524	0.557222	0.401528	0.689476	0.679507	0.73455	0.418383	0.580409	0.725146	0.637636	0.744102	0.614911	0.385089	0.255898	0.274854	0.362364	3.16	0.99933	1891.94	2023.9	767.08	696.06	1224.8
MRC	Median-Based Robust without IOI	MRCnIOI	-1	ü		27	0.363085	0.359509	0.361292	0.734418	0.748082	1.09898	1.04826	0.310392	0.310392	0.5571	0.402161	0.689608	0.679754	0.734485	0.418143	0.580338	0.72554	0.637545	0.743565	0.615943	0.384057	0.256435	0.27446	0.362455	3.16	0.99933	1894.92	2022.44	765	697.52	1226.88
MRC	Median-Based Robust without IOI	MRCnIOI	-1	ü		38	0.362277	0.358387	0.360326	0.734372	0.751983	1.11445	1.05561	0.310762	0.310762	0.557434	0.401482	0.689238	0.679194	0.73445	0.418606	0.580279	0.724778	0.6375	0.744277	0.61411	0.38589	0.255723	0.275222	0.3625	3.16	0.99933	1891.72	2024.38	768.68	695.58	1223.2
MRC	Median-Based Robust without IOI	MRCnIOI	-1	ü		39	0.36222	0.358324	0.360266	0.734359	0.752742	1.11729	1.05695	0.310787	0.310787	0.557456	0.40124	0.689213	0.679162	0.734437	0.418625	0.580264	0.724742	0.637478	0.744288	0.614036	0.385964	0.255712	0.275258	0.362522	3.16	0.99933	1890.58	2024.42	768.84	695.54	1223.04
MRC	Median-Based Robust without IOI	MRCnIOI	-1	ü		30	0.362834	0.359227	0.361025	0.734341	0.749249	1.10324	1.05029	0.310511	0.310511	0.557207	0.401724	0.689489	0.679613	0.734409	0.418232	0.580243	0.725393	0.637441	0.743561	0.615665	0.384335	0.256439	0.274607	0.362559	3.16	0.99933	1892.86	2022.44	765.56	697.52	1226.32
MRC	Median-Based Robust without IOI	MRCnIOI	-1	ü		26	0.363172	0.35973	0.361446	0.734328	0.748171	1.09891	1.04823	0.310363	0.310363	0.557071	0.402033	0.689637	0.679865	0.734393	0.418006	0.580231	0.725757	0.637415	0.743156	0.616574	0.383426	0.256844	0.274243	0.362585	3.16	0.99933	1894.32	2021.34	763.76	698.62	1228.12
MRC	Median-Based Robust without IOI	MRCnIOI	-1	ü		28	0.362962	0.359428	0.36119	0.734319	0.748532	1.10034	1.04891	0.31046	0.31046	0.557164	0.401932	0.68954	0.679714	0.734386	0.418137	0.580213	0.725549	0.637412	0.743358	0.61607	0.38393	0.256642	0.274451	0.362588	3.16	0.99933	1893.84	2021.88	764.76	698.08	1227.12
MRC	Median-Based Robust without IOI	MRCnIOI	-1	ü		43	0.361432	0.357232	0.359325	0.734308	0.754529	1.12306	1.05968	0.311144	0.311144	0.557774	0.400671	0.688856	0.678616	0.734395	0.419069	0.580201	0.724019	0.637414	0.744944	0.612288	0.387712	0.255056	0.275981	0.362586	3.16	0.99933	1887.9	2026.2	772.3	693.76	1219.58
MRC	Median-Based Robust without IOI	MRCnIOI	-1	ü		29	0.362908	0.359402	0.36115	0.734279	0.748927	1.10182	1.04961	0.310486	0.310486	0.557186	0.401762	0.689514	0.679701	0.734345	0.418131	0.580164	0.725556	0.637353	0.743266	0.616136	0.383864	0.256734	0.274444	0.362647	3.16	0.99933	1893.04	2021.64	764.64	698.32	1227.24
MRC	Median-Based Robust without IOI	MRCnIOI	-1	ü		37	0.362075	0.358189	0.360126	0.734274	0.751898	1.11324	1.05503	0.310864	0.310864	0.557525	0.40121	0.689136	0.679095	0.734352	0.418651	0.580157	0.724707	0.637369	0.744153	0.614037	0.385963	0.255847	0.275293	0.362631	3.16	0.99933	1890.44	2024.04	768.82	695.92	1223.06
MRC	Median-Based Robust without IOI	MRCnIOI	-1	ü		41	0.36163	0.357572	0.359594	0.734265	0.753676	1.12022	1.05834	0.311059	0.311059	0.557699	0.400875	0.688941	0.678786	0.734348	0.418905	0.580146	0.724285	0.637345	0.744576	0.612996	0.387004	0.255424	0.275715	0.362655	3.16	0.99933	1888.86	2025.2	770.9	694.76	1220.98
MRC	Median-Based Robust without IOI	MRCnIOI	-1	ü		31	0.362419	0.358809	0.360609	0.734187	0.749563	1.10396	1.05063	0.310707	0.310707	0.557386	0.401562	0.689293	0.679404	0.734255	0.418345	0.580048	0.725207	0.637213	0.743439	0.61537	0.38463	0.256561	0.274793	0.362787	3.16	0.99933	1892.1	2022.12	766.16	697.84	1225.72
MRC	Median-Based Robust without IOI	MRCnIOI	-1	ü		34	0.362063	0.35831	0.360181	0.734164	0.750442	1.1071	1.05212	0.310876	0.310876	0.557538	0.401236	0.689124	0.679155	0.734239	0.418549	0.580019	0.72487	0.637193	0.743756	0.614554	0.385446	0.256244	0.27513	0.362807	3.16	0.99933	1890.56	2022.96	767.8	697	1224.08
MRC	Median-Based Robust without IOI	MRCnIOI	-1	ü		33	0.361989	0.358214	0.360095	0.734157	0.750213	1.10663	1.0519	0.31091	0.31091	0.557568	0.401469	0.68909	0.679107	0.734232	0.418591	0.58001	0.724803	0.637186	0.74381	0.614404	0.385596	0.25619	0.275197	0.362814	3.16	0.99933	1891.66	2023.1	768.1	696.86	1223.78
MRC	Median-Based Robust without IOI	MRCnIOI	-1	ü		44	0.360917	0.356681	0.358792	0.734136	0.755192	1.12511	1.06064	0.31139	0.31139	0.557994	0.400404	0.68861	0.67834	0.734224	0.419228	0.579987	0.723754	0.637163	0.744872	0.611809	0.388191	0.255128	0.276246	0.362837	3.16	0.99933	1886.64	2026	773.26	693.96	1218.62
MRC	Median-Based Robust without IOI	MRCnIOI	-1	ü		35	0.361871	0.358109	0.359984	0.734087	0.751057	1.11013	1.05356	0.31097	0.31097	0.557619	0.401333	0.68903	0.679055	0.734162	0.418602	0.579926	0.72478	0.637091	0.743694	0.614416	0.385584	0.256306	0.27522	0.362909	3.16	0.99933	1891.02	2022.8	768.08	697.16	1223.8
MRC	Median-Based Robust without IOI	MRCnIOI	-1	ü		40	0.361482	0.35757	0.35952	0.73408	0.753044	1.11835	1.05745	0.311139	0.311139	0.557773	0.401185	0.688861	0.678785	0.734158	0.418826	0.579914	0.724413	0.637068	0.74406	0.61351	0.38649	0.25594	0.275587	0.362932	3.16	0.99933	1890.32	2023.8	769.88	696.16	1222
MRC	Median-Based Robust without IOI	MRCnIOI	-1	ü		45	0.360737	0.356524	0.358623	0.734041	0.755646	1.12646	1.06128	0.311479	0.311479	0.558076	0.400319	0.688521	0.678262	0.734129	0.419256	0.579866	0.72371	0.637027	0.744724	0.611799	0.388201	0.255276	0.27629	0.362973	3.16	0.99933	1886.24	2025.6	773.28	694.36	1218.6
MRC	Median-Based Robust without IOI	MRCnIOI	-1	ü		25	0.362817	0.359533	0.361171	0.73404	0.748307	1.09812	1.04786	0.31055	0.31055	0.557242	0.401634	0.68945	0.679767	0.734101	0.417971	0.579867	0.725814	0.637003	0.742508	0.617025	0.382975	0.257492	0.274186	0.362997	3.16	0.99933	1892.44	2019.58	762.88	700.38	1229
MRC	Median-Based Robust without IOI	MRCnIOI	-1	ü		36	0.361792	0.358051	0.359916	0.734028	0.751634	1.11159	1.05425	0.311012	0.311012	0.557657	0.401074	0.688988	0.679026	0.734103	0.418602	0.579852	0.724784	0.637008	0.743572	0.61448	0.38552	0.256428	0.275216	0.362992	3.16	0.99933	1889.8	2022.46	767.94	697.5	1223.94
MRC	Median-Based Robust without IOI	MRCnIOI	-1	ü		46	0.360298	0.355973	0.358128	0.733961	0.756202	1.12801	1.062	0.311683	0.311683	0.558258	0.400073	0.688317	0.677986	0.734053	0.419456	0.579768	0.723379	0.636919	0.744911	0.611061	0.388939	0.255089	0.276621	0.363081	3.16	0.99933	1885.08	2026.12	774.76	693.84	1217.12
MRC	Median-Based Robust without IOI	MRCnIOI	-1	ü		48	0.359886	0.355427	0.357648	0.733909	0.756996	1.13061	1.06323	0.311874	0.311874	0.558429	0.399898	0.688126	0.677713	0.734006	0.419665	0.579703	0.723035	0.636851	0.74517	0.610257	0.389743	0.25483	0.276965	0.363149	3.16	0.99933	1884.26	2026.82	776.36	693.14	1215.52
MRC	Median-Based Robust without IOI	MRCnIOI	-1	ü		47	0.360057	0.355683	0.357863	0.733906	0.756588	1.1292	1.06257	0.311797	0.311797	0.558359	0.400013	0.688203	0.677842	0.734	0.419554	0.579701	0.723216	0.636841	0.744973	0.61071	0.38929	0.255027	0.276784	0.363159	3.16	0.99933	1884.8	2026.28	775.46	693.68	1216.42
MRC	Median-Based Robust without IOI	MRCnIOI	-1	ü		49	0.359566	0.355063	0.357306	0.733824	0.757518	1.13232	1.06404	0.312022	0.312022	0.558562	0.399775	0.687978	0.677531	0.733922	0.419784	0.579596	0.72284	0.636726	0.745198	0.609864	0.390136	0.254802	0.27716	0.363274	3.16	0.99933	1883.68	2026.9	777.14	693.06	1214.74
MRC	Median-Based Robust without IOI	MRCnIOI	-1	ü		52	0.359022	0.354484	0.356745	0.733627	0.758872	1.1376	1.06652	0.312286	0.312286	0.558798	0.399903	0.687714	0.677242	0.733727	0.419948	0.579352	0.722572	0.63645	0.745082	0.609402	0.390598	0.254918	0.277428	0.36355	3.16	0.99933	1884.28	2026.58	778.06	693.38	1213.82
PCC	Standard Pearson without IOI	PCCnIOI	65535	ü	ü	98	0.381468	0.369989	0.375683	0.747111	0.736848	1.09907	1.04829	0.301595	0.301595	0.549144	0.414917	0.698405	0.684995	0.747508	0.419108	0.59635	0.72395	0.657518	0.771861	0.598129	0.401871	0.228139	0.27605	0.342482	3.12	0.999338	1955.04	2099.42	800.52	620.56	1191.38
MRC	Median-Based Robust without IOI	MRCnIOI	-1	ü		50	0.358956	0.354414	0.356677	0.733605	0.758133	1.13469	1.06515	0.312315	0.312315	0.558823	0.399801	0.687685	0.677207	0.733704	0.419967	0.579326	0.722537	0.636419	0.745071	0.609344	0.390656	0.254929	0.277463	0.363581	3.16	0.99933	1883.8	2026.56	778.18	693.4	1213.7
MRC	Median-Based Robust without IOI	MRCnIOI	-1	ü		53	0.358713	0.354058	0.356377	0.733603	0.758825	1.13801	1.06671	0.31243	0.31243	0.558925	0.400056	0.68757	0.677029	0.733708	0.420118	0.579324	0.72229	0.636424	0.745335	0.608723	0.391277	0.254665	0.27771	0.363576	3.16	0.99933	1885	2027.26	779.42	692.7	1212.46
MRC	Median-Based Robust without IOI	MRCnIOI	-1	ü		59	0.358127	0.353262	0.355686	0.733571	0.761342	1.14706	1.07094	0.312689	0.312689	0.559158	0.399517	0.687311	0.676631	0.733681	0.420434	0.579281	0.721768	0.636359	0.745816	0.607446	0.392554	0.254184	0.278232	0.363641	3.16	0.99933	1882.46	2028.58	781.96	691.38	1209.92
MRC	Median-Based Robust without IOI	MRCnIOI	-1	ü		56	0.358292	0.353531	0.355902	0.733535	0.760527	1.14347	1.06927	0.312625	0.312625	0.559102	0.39955	0.687375	0.676765	0.733643	0.420312	0.579235	0.721973	0.636319	0.745531	0.608	0.392	0.254469	0.278027	0.363681	3.16	0.99933	1882.62	2027.78	780.86	692.18	1211.02
MRC	Median-Based Robust without IOI	MRCnIOI	-1	ü		51	0.358754	0.354203	0.35647	0.733534	0.758579	1.13582	1.06568	0.312413	0.312413	0.558909	0.399623	0.687587	0.677102	0.733635	0.420025	0.579239	0.722441	0.636313	0.745029	0.609174	0.390826	0.254971	0.277559	0.363687	3.16	0.99933	1882.96	2026.44	778.52	693.52	1213.36
MRC	Median-Based Robust without IOI	MRCnIOI	-1	ü		55	0.358406	0.353698	0.356043	0.733531	0.759793	1.14063	1.06794	0.312574	0.312574	0.559058	0.399657	0.687426	0.676849	0.733637	0.420241	0.579228	0.722091	0.636315	0.745397	0.608301	0.391699	0.254603	0.277909	0.363685	3.16	0.99933	1883.12	2027.42	780.26	692.54	1211.62
MRC	Median-Based Robust without IOI	MRCnIOI	-1	ü		57	0.358315	0.353586	0.355942	0.73352	0.760731	1.14464	1.06981	0.312613	0.312613	0.559091	0.399657	0.687387	0.676793	0.733627	0.420281	0.579216	0.722022	0.636293	0.745445	0.60814	0.39186	0.254555	0.277978	0.363707	3.16	0.99933	1883.12	2027.56	780.58	692.4	1211.3
MRC	Median-Based Robust without IOI	MRCnIOI	-1	ü		58	0.358079	0.353289	0.355675	0.733483	0.761113	1.14647	1.07066	0.312719	0.312719	0.559186	0.399708	0.687281	0.676644	0.733591	0.420389	0.579169	0.721846	0.636233	0.745553	0.607736	0.392264	0.254447	0.278154	0.363767	3.16	0.99933	1883.36	2027.86	781.38	692.1	1210.5
MRC	Median-Based Robust without IOI	MRCnIOI	-1	ü		54	0.358392	0.353734	0.356054	0.733481	0.759526	1.13962	1.06746	0.312583	0.312583	0.559063	0.399678	0.687417	0.676867	0.733585	0.420205	0.579169	0.722148	0.636244	0.745232	0.608502	0.391498	0.254768	0.277852	0.363756	3.16	0.99933	1883.22	2026.98	779.86	692.98	1212.02
MRC	Median-Based Robust without IOI	MRCnIOI	-1	ü		24	0.361921	0.358849	0.360381	0.733481	0.748863	1.09871	1.04814	0.311004	0.311004	0.557649	0.401286	0.688996	0.679425	0.733537	0.418026	0.57917	0.725721	0.6362	0.741466	0.617383	0.382617	0.258534	0.274279	0.3638	3.16	0.99933	1890.8	2016.74	762.18	703.22	1229.7
MRC	Median-Based Robust without IOI	MRCnIOI	-1	ü		61	0.357967	0.353145	0.355547	0.733463	0.76169	1.14869	1.0717	0.31277	0.31277	0.559232	0.399614	0.68723	0.676573	0.733572	0.42044	0.579145	0.721761	0.636206	0.745601	0.607544	0.392456	0.254399	0.278239	0.363794	3.16	0.99933	1882.92	2028	781.76	691.96	1210.12
MRC	Median-Based Robust without IOI	MRCnIOI	-1	ü		60	0.357897	0.353081	0.35548	0.733432	0.761423	1.14798	1.07138	0.312803	0.312803	0.559262	0.39972	0.687197	0.67654	0.733541	0.420457	0.579107	0.721733	0.636164	0.745565	0.607516	0.392484	0.254435	0.278267	0.363836	3.16	0.99933	1883.42	2027.9	781.82	692.06	1210.06
MRC	Median-Based Robust without IOI	MRCnIOI	-1	ü		23	0.361468	0.358428	0.359944	0.733273	0.748952	1.09742	1.04752	0.311224	0.311224	0.55785	0.400811	0.688776	0.679214	0.733328	0.418119	0.578907	0.725571	0.635897	0.741197	0.617231	0.382769	0.258803	0.274429	0.364103	3.16	0.99933	1888.56	2016	762.48	703.96	1229.4
MRC	Median-Based Robust without IOI	MRCnIOI	-1	ü		62	0.357179	0.352283	0.354722	0.733215	0.762289	1.15026	1.07243	0.313143	0.313143	0.559566	0.399389	0.686857	0.676141	0.733327	0.4207	0.578835	0.721333	0.635846	0.745544	0.606739	0.393261	0.254456	0.278667	0.364154	3.16	0.99933	1881.86	2027.84	783.36	692.12	1208.52
MRC	Median-Based Robust without IOI	MRCnIOI	-1	ü		63	0.356706	0.351834	0.354261	0.73301	0.762726	1.15203	1.07325	0.313372	0.313372	0.55977	0.399296	0.686628	0.675917	0.733122	0.420803	0.578581	0.72116	0.635547	0.745308	0.606526	0.393474	0.254692	0.27884	0.364453	3.16	0.99933	1881.42	2027.2	783.8	692.76	1208.08
MRC	Median-Based Robust without IOI	MRCnIOI	-1	ü		64	0.355923	0.350991	0.353447	0.732748	0.763414	1.15343	1.07391	0.313746	0.313746	0.560103	0.39888	0.686254	0.675495	0.732863	0.421048	0.578256	0.720755	0.635167	0.745198	0.605792	0.394208	0.254802	0.279245	0.364833	3.16	0.99933	1879.46	2026.9	785.26	693.06	1206.62
MRC	Median-Based Robust without IOI	MRCnIOI	-1	ü		22	0.360468	0.357582	0.359021	0.732718	0.749147	1.0972	1.04741	0.311725	0.311725	0.5583	0.400578	0.688275	0.678791	0.732771	0.418248	0.578214	0.725361	0.635107	0.740287	0.617295	0.382705	0.259713	0.274639	0.364893	3.16	0.99933	1887.46	2013.52	762.36	706.44	1229.52
MRC	Median-Based Robust without IOI	MRCnIOI	-1	ü		65	0.355611	0.350743	0.353167	0.732569	0.763609	1.15451	1.07441	0.313899	0.313899	0.560236	0.398986	0.686101	0.675371	0.732681	0.421074	0.578034	0.720712	0.634899	0.744876	0.605867	0.394133	0.255124	0.279288	0.365101	3.16	0.99933	1879.96	2026.02	785.1	693.94	1206.78
MRC	Median-Based Robust without IOI	MRCnIOI	-1	ü		66	0.355438	0.350565	0.352992	0.732503	0.763851	1.15506	1.07467	0.313983	0.313983	0.560313	0.398931	0.686017	0.675282	0.732615	0.421123	0.577951	0.720631	0.634807	0.744826	0.605739	0.394261	0.255174	0.279369	0.365193	3.16	0.99933	1879.7	2025.88	785.36	694.08	1206.52
MRC	Median-Based Robust without IOI	MRCnIOI	-1	ü		69	0.355367	0.350465	0.352906	0.732491	0.764504	1.15833	1.07619	0.314017	0.314017	0.560342	0.399029	0.685983	0.675232	0.732605	0.421162	0.57794	0.720565	0.634802	0.744873	0.605591	0.394409	0.255127	0.279435	0.365198	3.16	0.99933	1880.16	2026.02	785.66	693.94	1206.22
MRC	Median-Based Robust without IOI	MRCnIOI	65535	ü	ü	26	0.382247	0.371299	0.376732	0.747106	0.731922	1.07244	1.03551	0.30119	0.30119	0.548783	0.413766	0.69881	0.68565	0.747472	0.418563	0.596338	0.724858	0.657389	0.770818	0.600481	0.399519	0.229182	0.275142	0.342611	3.16	0.99933	1949.6	2096.58	795.78	623.38	1196.1
MRC	Median-Based Robust without IOI	MRCnIOI	-1	ü		21	0.359875	0.357107	0.358487	0.732349	0.749351	1.09609	1.04688	0.312031	0.312031	0.558569	0.4	0.687969	0.678554	0.7324	0.418298	0.57776	0.725275	0.6346	0.739627	0.617481	0.382519	0.260373	0.274725	0.3654	3.16	0.99933	1884.74	2011.72	762	708.24	1229.88
MRC	Median-Based Robust without IOI	MRCnIOI	-1	ü		67	0.354951	0.350075	0.352504	0.732311	0.76447	1.15731	1.07571	0.314217	0.314217	0.560521	0.398697	0.685783	0.675037	0.732424	0.42125	0.577712	0.720424	0.634527	0.744651	0.605424	0.394576	0.255349	0.279576	0.365473	3.16	0.99933	1878.6	2025.4	785.98	694.56	1205.9
MRC	Median-Based Robust without IOI	MRCnIOI	-1	ü		68	0.354981	0.350154	0.352558	0.732281	0.764394	1.15762	1.07586	0.314204	0.314204	0.56051	0.398952	0.685796	0.675077	0.732392	0.421205	0.577676	0.720498	0.634483	0.744509	0.605645	0.394355	0.255491	0.279502	0.365517	3.16	0.99933	1879.8	2025.02	785.54	694.94	1206.34
MRC	Median-Based Robust without IOI	MRCnIOI	-1	ü		71	0.354713	0.349774	0.352234	0.732263	0.765175	1.16003	1.07698	0.314331	0.314331	0.560624	0.398642	0.685669	0.674887	0.73238	0.421357	0.577653	0.720246	0.634468	0.744746	0.605027	0.394973	0.255254	0.279754	0.365532	3.16	0.99933	1878.34	2025.66	786.78	694.3	1205.1
MRC	Median-Based Robust without IOI	MRCnIOI	-1	ü		70	0.354914	0.35007	0.352483	0.732262	0.765103	1.15956	1.07676	0.314238	0.314238	0.56054	0.398625	0.685762	0.675035	0.732375	0.421232	0.577653	0.720451	0.634463	0.744522	0.605548	0.394452	0.255478	0.279549	0.365537	3.16	0.99933	1878.26	2025.06	785.74	694.9	1206.14
MRC	Median-Based Robust without IOI	MRCnIOI	-1	ü		72	0.354636	0.349692	0.352154	0.73223	0.765731	1.16209	1.07793	0.31437	0.31437	0.560655	0.398523	0.68563	0.674846	0.732346	0.421376	0.577615	0.720211	0.634425	0.744715	0.604977	0.395023	0.255285	0.279789	0.365575	3.16	0.99933	1877.78	2025.58	786.88	694.38	1205
MRC	Median-Based Robust without IOI	MRCnIOI	-1	ü		73	0.354242	0.349237	0.351729	0.732129	0.766181	1.16348	1.07857	0.314556	0.314556	0.560822	0.398392	0.685444	0.674618	0.732248	0.421524	0.577488	0.719966	0.634276	0.744769	0.604467	0.395533	0.255231	0.280034	0.365724	3.16	0.99933	1877.16	2025.72	787.9	694.24	1203.98
MRC	Median-Based Robust without IOI	MRCnIOI	-1	ü		74	0.354053	0.348996	0.351514	0.732094	0.766524	1.16481	1.0792	0.314646	0.314646	0.560901	0.398388	0.685354	0.674498	0.732216	0.421611	0.577446	0.719824	0.63423	0.744851	0.604144	0.395856	0.255149	0.280176	0.36577	3.16	0.99933	1877.14	2025.94	788.54	694.02	1203.34
MRC	Median-Based Robust without IOI	MRCnIOI	-1	ü		75	0.354024	0.34899	0.351497	0.73206	0.766843	1.16615	1.07981	0.314663	0.314663	0.560916	0.3984	0.685337	0.674495	0.732181	0.4216	0.577403	0.719841	0.634182	0.744763	0.604228	0.395772	0.255237	0.280159	0.365818	3.16	0.99933	1877.2	2025.7	788.38	694.26	1203.5
MRC	Median-Based Robust without IOI	MRCnIOI	-1	ü		76	0.353896	0.348827	0.351351	0.732041	0.767182	1.1674	1.08039	0.314722	0.314722	0.560969	0.398371	0.685278	0.674413	0.732163	0.421662	0.57738	0.719739	0.634157	0.744831	0.603996	0.396004	0.255169	0.280261	0.365843	3.16	0.99933	1877.06	2025.88	788.84	694.08	1203.04
MRC	Median-Based Robust without IOI	MRCnIOI	-1	ü		20	0.35906	0.356415	0.357734	0.73191	0.749589	1.09603	1.04686	0.312438	0.312438	0.558936	0.399729	0.687562	0.678208	0.73196	0.418408	0.577211	0.725089	0.633972	0.73893	0.617485	0.382515	0.26107	0.274911	0.366028	3.16	0.99933	1883.46	2009.82	762.02	710.14	1229.86
MRC	Median-Based Robust without IOI	MRCnIOI	-1	ü		77	0.353447	0.348349	0.350888	0.731891	0.767887	1.16913	1.08119	0.314934	0.314934	0.561157	0.398057	0.685066	0.674175	0.732014	0.421797	0.577195	0.719513	0.633934	0.744762	0.603587	0.396413	0.255238	0.280487	0.366066	3.16	0.99933	1875.58	2025.7	789.66	694.26	1202.22
MRC	Median-Based Robust without IOI	MRCnIOI	-1	ü		79	0.3531	0.347982	0.35053	0.731774	0.768863	1.17239	1.0827	0.3151	0.3151	0.561304	0.397768	0.6849	0.673991	0.731898	0.421902	0.577048	0.71934	0.63376	0.744706	0.603276	0.396724	0.255294	0.28066	0.36624	3.16	0.99933	1874.22	2025.54	790.28	694.42	1201.6
MRC	Median-Based Robust without IOI	MRCnIOI	-1	ü		80	0.353014	0.347887	0.35044	0.73175	0.769415	1.174	1.08345	0.315138	0.315138	0.561341	0.397556	0.684862	0.673943	0.731875	0.421931	0.577016	0.719294	0.63372	0.744704	0.603182	0.396818	0.255296	0.280706	0.36628	3.16	0.99933	1873.22	2025.54	790.46	694.42	1201.42
MRC	Median-Based Robust without IOI	MRCnIOI	-1	ü		82	0.35293	0.347781	0.350345	0.731729	0.769997	1.17619	1.08446	0.31518	0.31518	0.561376	0.397484	0.68482	0.673891	0.731855	0.421966	0.576993	0.719234	0.633696	0.744728	0.603054	0.396946	0.255272	0.280766	0.366304	3.16	0.99933	1872.88	2025.6	790.72	694.36	1201.16
MRC	Median-Based Robust without IOI	MRCnIOI	-1	ü		81	0.352938	0.347807	0.350362	0.731721	0.769606	1.17452	1.08368	0.315176	0.315176	0.561374	0.397454	0.684824	0.673903	0.731847	0.421951	0.57698	0.71926	0.633678	0.744684	0.603123	0.396877	0.255316	0.28074	0.366322	3.16	0.99933	1872.74	2025.48	790.58	694.48	1201.3
MRC	Median-Based Robust without IOI	MRCnIOI	-1	ü		90	0.352567	0.347272	0.349908	0.731712	0.771847	1.18206	1.08716	0.315342	0.315342	0.561522	0.397	0.684658	0.673636	0.731843	0.422165	0.57697	0.718904	0.633663	0.745044	0.602228	0.397772	0.254956	0.281096	0.366337	3.16	0.99933	1870.6	2026.48	792.36	693.48	1199.52
MRC	Median-Based Robust without IOI	MRCnIOI	-1	ü		93	0.352524	0.347231	0.349866	0.731697	0.772565	1.18397	1.08804	0.315363	0.315363	0.561541	0.396673	0.684637	0.673615	0.731828	0.422177	0.57695	0.718886	0.633638	0.745033	0.602198	0.397802	0.254967	0.281114	0.366362	3.16	0.99933	1869.06	2026.44	792.42	693.52	1199.46
MRC	Median-Based Robust without IOI	MRCnIOI	-1	ü		78	0.352902	0.347804	0.350343	0.731674	0.76846	1.17097	1.08204	0.315197	0.315197	0.561392	0.397832	0.684803	0.673902	0.731798	0.421937	0.576924	0.719281	0.633621	0.744563	0.603241	0.396759	0.255437	0.280719	0.366379	3.16	0.99933	1874.52	2025.16	790.36	694.8	1201.52
MRC	Median-Based Robust without IOI	MRCnIOI	-1	ü		89	0.352501	0.34722	0.349849	0.731669	0.771805	1.18226	1.08725	0.315376	0.315376	0.561551	0.397106	0.684624	0.67361	0.731799	0.42217	0.576918	0.718896	0.633605	0.744963	0.602257	0.397743	0.255037	0.281104	0.366395	3.16	0.99933	1871.1	2026.26	792.3	693.7	1199.58
MRC	Median-Based Robust without IOI	MRCnIOI	-1	ü		83	0.352708	0.347539	0.350113	0.731657	0.770442	1.17756	1.08509	0.315286	0.315286	0.561472	0.397284	0.684714	0.67377	0.731784	0.422038	0.576902	0.719117	0.633592	0.744706	0.602833	0.397167	0.255294	0.280883	0.366408	3.16	0.99933	1871.94	2025.54	791.16	694.42	1200.72
MRC	Median-Based Robust without IOI	MRCnIOI	-1	ü		92	0.352384	0.347082	0.349722	0.731644	0.772505	1.18358	1.08786	0.315431	0.315431	0.561602	0.396673	0.684569	0.673541	0.731776	0.422218	0.576884	0.718819	0.633565	0.744996	0.602086	0.397914	0.255004	0.281181	0.366435	3.16	0.99933	1869.06	2026.34	792.64	693.62	1199.24
MRC	Median-Based Robust without IOI	MRCnIOI	-1	ü		91	0.352482	0.34726	0.34986	0.731613	0.772293	1.18327	1.08772	0.315388	0.315388	0.561563	0.396741	0.684612	0.67363	0.731742	0.422133	0.576847	0.718959	0.633523	0.744782	0.602478	0.397522	0.255218	0.281041	0.366477	3.16	0.99933	1869.38	2025.76	791.86	694.2	1200.02
MRC	Median-Based Robust without IOI	MRCnIOI	-1	ü		94	0.352328	0.347036	0.349671	0.73161	0.773061	1.18536	1.08868	0.31546	0.31546	0.561628	0.396431	0.68454	0.673518	0.731742	0.422222	0.576842	0.71881	0.633517	0.744937	0.602099	0.397901	0.255063	0.28119	0.366483	3.16	0.99933	1867.92	2026.18	792.62	693.78	1199.26
MRC	Median-Based Robust without IOI	MRCnIOI	-1	ü		97	0.352279	0.346981	0.349619	0.731601	0.774135	1.18954	1.0906	0.315482	0.315482	0.561646	0.396337	0.684518	0.67349	0.731733	0.422241	0.576832	0.718779	0.633501	0.744952	0.602029	0.397971	0.255048	0.281221	0.366499	3.16	0.99933	1867.48	2026.22	792.76	693.74	1199.12
MRC	Median-Based Robust without IOI	MRCnIOI	-1	ü		88	0.352367	0.347104	0.349724	0.731599	0.771716	1.18178	1.08703	0.315443	0.315443	0.56161	0.397017	0.684557	0.673552	0.73173	0.422193	0.576833	0.718857	0.63351	0.744863	0.602241	0.397759	0.255137	0.281143	0.36649	3.16	0.99933	1870.68	2025.98	792.34	693.98	1199.54
MRC	Median-Based Robust without IOI	MRCnIOI	-1	ü		19	0.358426	0.355835	0.357127	0.731599	0.749559	1.09561	1.04666	0.31274	0.31274	0.559206	0.399742	0.68726	0.677917	0.731645	0.418523	0.576824	0.724908	0.633519	0.738473	0.617362	0.382638	0.261527	0.275092	0.366481	3.16	0.99933	1883.52	2008.6	762.22	711.36	1229.66
MRC	Median-Based Robust without IOI	MRCnIOI	-1	ü		84	0.352562	0.347396	0.349968	0.73159	0.770557	1.17809	1.08533	0.315359	0.315359	0.561536	0.397373	0.684641	0.673698	0.731717	0.42207	0.576819	0.719064	0.633498	0.744625	0.602771	0.397229	0.255375	0.280936	0.366502	3.16	0.99933	1872.36	2025.32	791.28	694.64	1200.6
MRC	Median-Based Robust without IOI	MRCnIOI	-1	ü		95	0.352224	0.346914	0.349558	0.731586	0.773482	1.18693	1.0894	0.315507	0.315507	0.561668	0.39638	0.684493	0.673457	0.731718	0.422263	0.576814	0.718742	0.633482	0.744958	0.601956	0.398044	0.255042	0.281258	0.366518	3.16	0.99933	1867.68	2026.24	792.9	693.72	1198.98
MRC	Median-Based Robust without IOI	MRCnIOI	-1	ü		96	0.352217	0.346954	0.349574	0.731545	0.773842	1.18849	1.09011	0.315516	0.315516	0.561677	0.396376	0.684484	0.673477	0.731676	0.422229	0.57676	0.7188	0.633417	0.744815	0.602139	0.397861	0.255185	0.2812	0.366583	3.16	0.99933	1867.66	2025.84	792.54	694.12	1199.34
MRC	Median-Based Robust without IOI	MRCnIOI	-1	ü		98	0.352033	0.346726	0.349368	0.731515	0.774513	1.19118	1.09135	0.315596	0.315596	0.561749	0.396354	0.684404	0.673363	0.731647	0.42231	0.576724	0.718662	0.633371	0.744896	0.60183	0.39817	0.255104	0.281338	0.366629	3.16	0.99933	1867.56	2026.08	793.16	693.88	1198.72
MRC	Median-Based Robust without IOI	MRCnIOI	-1	ü		99	0.352028	0.346735	0.34937	0.731505	0.774598	1.19162	1.09156	0.315596	0.315596	0.561751	0.396397	0.684404	0.673367	0.731636	0.422302	0.57671	0.718677	0.63335	0.744857	0.601878	0.398122	0.255143	0.281323	0.36665	3.16	0.99933	1867.76	2025.98	793.06	693.98	1198.82
MRC	Median-Based Robust without IOI	MRCnIOI	-1	ü		85	0.352322	0.347152	0.349727	0.7315	0.771155	1.17997	1.0862	0.315473	0.315473	0.561637	0.397161	0.684527	0.673576	0.731627	0.422133	0.576707	0.718958	0.633364	0.744552	0.602601	0.397399	0.255448	0.281042	0.366636	3.16	0.99933	1871.36	2025.12	791.62	694.84	1200.26
MRC	Median-Based Robust without IOI	MRCnIOI	-1	ü		86	0.352201	0.347013	0.349596	0.731471	0.771202	1.18043	1.0864	0.315528	0.315528	0.561687	0.397216	0.684472	0.673506	0.731599	0.422179	0.576672	0.718882	0.633319	0.744573	0.60244	0.39756	0.255427	0.281118	0.366681	3.16	0.99933	1871.62	2025.18	791.94	694.78	1199.94
MRC	Median-Based Robust without IOI	MRCnIOI	-1	ü		87	0.352093	0.34686	0.349466	0.731464	0.77158	1.18154	1.08692	0.315579	0.315579	0.561731	0.397089	0.684421	0.67343	0.731594	0.422241	0.576664	0.71878	0.633314	0.744669	0.602191	0.397809	0.255331	0.28122	0.366686	3.16	0.99933	1871.02	2025.44	792.44	694.52	1199.44
MRC	Median-Based Robust without IOI	MRCnIOI	-1	ü		100	0.351615	0.346284	0.348938	0.731368	0.775175	1.1935	1.09242	0.315796	0.315796	0.561928	0.396219	0.684204	0.673142	0.731501	0.422433	0.57654	0.718461	0.633155	0.744809	0.601476	0.398524	0.255191	0.281539	0.366845	3.16	0.99933	1866.92	2025.84	793.86	694.12	1198.02
MRC	Median-Based Robust without IOI	MRCnIOI	-1	ü		18	0.357508	0.355058	0.35628	0.731082	0.749971	1.09716	1.04739	0.313202	0.313202	0.55962	0.399877	0.686798	0.677529	0.731125	0.418644	0.576182	0.724708	0.6328	0.737627	0.617431	0.382569	0.262373	0.275292	0.3672	3.16	0.99933	1884.16	2006.3	762.1	713.66	1229.78
MRC	Median-Based Robust without IOI	MRCnIOI	-1	ü		16	0.356716	0.35447	0.35559	0.730547	0.750921	1.09834	1.04796	0.31361	0.31361	0.559981	0.39936	0.68639	0.677235	0.730586	0.418671	0.575523	0.724657	0.632059	0.736592	0.617877	0.382123	0.263408	0.275343	0.367941	3.16	0.99933	1881.72	2003.5	761.22	716.46	1230.66
MRC	Median-Based Robust without IOI	MRCnIOI	-1	ü		17	0.356712	0.35448	0.355593	0.730522	0.75093	1.09872	1.04814	0.313618	0.313618	0.55999	0.399275	0.686382	0.67724	0.730561	0.418662	0.57549	0.72468	0.632032	0.736519	0.617961	0.382039	0.263481	0.27532	0.367968	3.16	0.99933	1881.32	2003.28	761.04	716.68	1230.84
MRC	Median-Based Robust without IOI	MRCnIOI	-1	ü		15	0.356514	0.354664	0.355587	0.730046	0.751426	1.09808	1.04784	0.313763	0.313763	0.560118	0.398876	0.686237	0.677332	0.730079	0.418374	0.574899	0.725148	0.631367	0.735075	0.619589	0.380411	0.264925	0.274852	0.368633	3.16	0.99933	1879.44	1999.36	757.8	720.6	1234.08
MRC	Median-Based Robust without IOI	MRCnIOI	-1	ü		14	0.355893	0.354086	0.354987	0.729748	0.752572	1.10097	1.04922	0.314068	0.314068	0.560391	0.398494	0.685932	0.677043	0.72978	0.418498	0.57453	0.724945	0.630947	0.734678	0.619407	0.380593	0.265322	0.275055	0.369053	3.16	0.99933	1877.64	1998.28	758.16	721.68	1233.72
MRC	Median-Based Robust without IOI	MRCnIOI	-1	ü		13	0.354099	0.35248	0.353288	0.728828	0.753349	1.10135	1.0494	0.314955	0.314955	0.561181	0.397802	0.685045	0.67624	0.728854	0.418806	0.573391	0.724439	0.62966	0.733322	0.619158	0.380842	0.266678	0.275561	0.37034	3.16	0.99933	1874.38	1994.6	758.66	725.36	1233.22
MRC	Median-Based Robust without IOI	MRCnIOI	-1	ü		12	0.352752	0.351433	0.352091	0.727941	0.754657	1.10496	1.05112	0.315656	0.315656	0.561805	0.397475	0.684344	0.675717	0.727964	0.418882	0.572291	0.724316	0.628436	0.731658	0.619775	0.380225	0.268342	0.275684	0.371564	3.16	0.99933	1872.84	1990.06	757.42	729.9	1234.46
JAC	Jaccard without IOI	JACnIOI	65535	ü	ü	53	0.377909	0.363805	0.370788	0.747094	0.725609	1.03865	1.01909	0.303475	0.303475	0.550858	0.412404	0.696525	0.681903	0.747647	0.421644	0.596328	0.719774	0.658135	0.776627	0.587178	0.412822	0.223373	0.280226	0.341865	3.12	0.999338	1943.2	2112.4	822.36	607.58	1169.54
MRC	Median-Based Robust without IOI	MRCnIOI	-1	ü		11	0.349022	0.348015	0.348517	0.726032	0.758129	1.1107	1.05385	0.317523	0.317523	0.563468	0.395213	0.682477	0.674008	0.726052	0.419563	0.569932	0.723203	0.625819	0.728942	0.619074	0.380926	0.271058	0.276797	0.374181	3.16	0.99933	1862.18	1982.66	758.82	737.3	1233.06
MRC	Median-Based Robust without IOI	MRCnIOI	-1	ü		10	0.345239	0.344569	0.344903	0.724037	0.761231	1.11821	1.0574	0.319429	0.319429	0.565152	0.393999	0.680571	0.672285	0.724055	0.420218	0.567485	0.722117	0.623122	0.72603	0.618539	0.381461	0.27397	0.277883	0.376878	3.16	0.99933	1856.46	1974.76	759.9	745.2	1231.98
MRC	Median-Based Robust without IOI	MRCnIOI	-1	ü		0	0.338325	0.335324	0.33682	0.723847	0.827468	1.37588	1.17291	0.322396	0.322396	0.56777	0.385641	0.677604	0.667662	0.723907	0.423986	0.56725	0.715878	0.622447	0.732056	0.603268	0.396732	0.267944	0.284122	0.377553	3.16	0.99933	1817.08	1991.16	790.28	728.8	1201.6
MRC	Median-Based Robust without IOI	MRCnIOI	-1	ü		9	0.339579	0.339507	0.339542	0.720902	0.766211	1.12915	1.06256	0.32232	0.32232	0.567705	0.391893	0.67768	0.669753	0.720921	0.421105	0.563642	0.720647	0.618932	0.721233	0.618273	0.381727	0.278767	0.279353	0.381068	3.16	0.99933	1846.54	1961.7	760.46	758.26	1231.42
MRC	Median-Based Robust without IOI	MRCnIOI	-1	ü		8	0.336845	0.336956	0.336899	0.719508	0.77032	1.1388	1.0671	0.323696	0.323696	0.568917	0.390051	0.676304	0.668478	0.719527	0.421628	0.561936	0.719784	0.617061	0.719308	0.617648	0.382352	0.280692	0.280216	0.382939	3.16	0.99933	1837.86	1956.46	761.7	763.5	1230.18
MRC	Median-Based Robust without IOI	MRCnIOI	-1	ü		7	0.331678	0.332155	0.331915	0.716803	0.775107	1.14992	1.0723	0.326306	0.326306	0.571214	0.38795	0.673694	0.666077	0.716821	0.422604	0.558638	0.718182	0.613496	0.715493	0.616661	0.383339	0.284507	0.281818	0.386504	3.16	0.99933	1827.96	1946.1	763.64	773.86	1228.24
MRC	Median-Based Robust without IOI	MRCnIOI	-1	ü		6	0.323424	0.324029	0.323726	0.71305	0.784025	1.16897	1.08115	0.330397	0.330397	0.574779	0.383451	0.669603	0.662015	0.713071	0.424562	0.554102	0.714919	0.608505	0.711266	0.612763	0.387237	0.288734	0.285081	0.391495	3.16	0.99933	1806.76	1934.6	771.42	785.36	1220.46
JAC	Jaccard without IOI	JACnIOI	65535	ü	ü	16	0.374513	0.357685	0.366001	0.747079	0.732256	1.0559	1.02751	0.305335	0.305335	0.552534	0.410223	0.694665	0.678842	0.747812	0.424065	0.596319	0.715754	0.65876	0.781336	0.576349	0.423651	0.218664	0.284246	0.34124	3.12	0.999338	1932.92	2125.2	843.92	594.78	1147.98
MRC	Median-Based Robust without IOI	MRCnIOI	-1	ü		5	0.316792	0.317937	0.317363	0.709326	0.792229	1.18944	1.09058	0.333824	0.333824	0.577753	0.379904	0.666176	0.658968	0.709354	0.425695	0.549614	0.713041	0.603751	0.705725	0.612212	0.387788	0.294275	0.286959	0.396249	3.18	0.999326	1790.04	1919.48	772.46	800.46	1219.42
MRC	Median-Based Robust without IOI	MRCnIOI	-1	ü		4	0.305339	0.307101	0.306218	0.70328	0.807319	1.22585	1.10714	0.339669	0.339669	0.582789	0.373584	0.660331	0.65355	0.70332	0.427931	0.542392	0.709276	0.596063	0.697443	0.609657	0.390343	0.302557	0.290724	0.403937	3.18	0.999326	1760.26	1897.02	777.54	822.92	1214.34
MRC	Median-Based Robust without IOI	MRCnIOI	-1	ü		3	0.288006	0.290366	0.289183	0.694255	0.832144	1.29294	1.13702	0.348569	0.348569	0.590371	0.366146	0.651431	0.645183	0.694329	0.431576	0.531738	0.703102	0.584904	0.685706	0.60466	0.39534	0.314294	0.296898	0.415096	3.22	0.999317	1725.2	1865.04	787.52	854.86	1204.36
MRC	Median-Based Robust without IOI	MRCnIOI	-1	ü		2	0.257743	0.260414	0.259074	0.679643	0.879099	1.42503	1.19369	0.363862	0.363862	0.603191	0.351105	0.636138	0.630207	0.679757	0.438623	0.514776	0.690981	0.566762	0.668762	0.591652	0.408348	0.331238	0.309019	0.433238	3.54	0.999249	1654.22	1818.74	813.44	900.88	1178.4
MRC	Median-Based Robust without IOI	MRCnIOI	-1	ü		1	0.209422	0.211717	0.210566	0.658142	0.990787	1.78527	1.33608	0.387814	0.387814	0.622722	0.323316	0.612186	0.605858	0.658261	0.450587	0.490517	0.6699	0.539522	0.646861	0.564856	0.435144	0.353139	0.3301	0.460478	4.44	0.999058	1523	1758.8	866.64	960.18	1124.94
JAC	Standard Jaccard	JAC	65535		ü	25	0.396454	0.379488	0.387876	0.755228	0.71192	1.00939	1.00463	0.295007	0.295007	0.543111	0.419904	0.704993	0.689744	0.755916	0.41867	0.606762	0.724671	0.671783	0.78854	0.590947	0.409053	0.21146	0.275329	0.328217	3.12	0.999338	1978.54	2144.78	814.84	575.2	1177.06
JAC	Standard Jaccard	JAC	65535		ü	26	0.39651	0.379647	0.387985	0.755206	0.711716	1.00885	1.00435	0.294969	0.294969	0.543077	0.419968	0.705031	0.689824	0.755888	0.418595	0.606734	0.724793	0.671717	0.788349	0.591299	0.408701	0.211651	0.275207	0.328283	3.12	0.999338	1978.84	2144.26	814.14	575.72	1177.76
JAC	Standard Jaccard	JAC	65535		ü	29	0.396767	0.380317	0.388453	0.755151	0.711007	1.00662	1.00325	0.294795	0.294795	0.542917	0.41993	0.705205	0.690159	0.755807	0.418292	0.606661	0.725291	0.671476	0.787636	0.592681	0.407319	0.212364	0.274709	0.328524	3.12	0.999338	1978.66	2142.32	811.38	577.66	1180.52
JAC	Standard Jaccard	JAC	65535		ü	35	0.397294	0.381364	0.389246	0.755132	0.709865	1.00295	1.00142	0.29449	0.29449	0.542637	0.420032	0.70551	0.690682	0.755756	0.417848	0.606636	0.726017	0.671277	0.786744	0.59462	0.40538	0.213256	0.273983	0.328723	3.12	0.999338	1979.14	2139.9	807.52	580.08	1184.38
JAC	Standard Jaccard	JAC	65535		ü	32	0.397013	0.380849	0.388845	0.75513	0.710545	1.00464	1.00226	0.294647	0.294647	0.542783	0.419735	0.705353	0.690425	0.755769	0.418062	0.606632	0.725667	0.671346	0.787149	0.5937	0.4063	0.212851	0.274333	0.328654	3.12	0.999338	1977.74	2141	809.36	578.98	1182.54
JAC	Standard Jaccard	JAC	65535		ü	39	0.397703	0.382182	0.389864	0.755123	0.709607	1.0022	1.00106	0.294248	0.294248	0.542416	0.420146	0.705752	0.691091	0.755721	0.417505	0.606622	0.726581	0.671123	0.786058	0.596124	0.403876	0.213942	0.273419	0.328877	3.12	0.999338	1979.68	2138.04	804.52	581.94	1187.38
JAC	Standard Jaccard	JAC	65535		ü	37	0.397413	0.381666	0.389458	0.755103	0.709857	1.00294	1.00142	0.294413	0.294413	0.54257	0.420015	0.705587	0.690833	0.755716	0.417713	0.606595	0.726242	0.671171	0.786416	0.595251	0.404749	0.213584	0.273758	0.328829	3.12	0.999338	1979.06	2139	806.26	580.98	1185.64
JAC	Standard Jaccard	JAC	65535		ü	23	0.395863	0.378776	0.387223	0.755056	0.712807	1.01163	1.00574	0.295296	0.295296	0.543377	0.419633	0.704704	0.689388	0.755752	0.418892	0.606542	0.724309	0.671554	0.788587	0.590188	0.409812	0.211413	0.275691	0.328446	3.12	0.999338	1977.26	2144.92	816.34	575.06	1175.56
JAC	Standard Jaccard	JAC	65535		ü	30	0.396727	0.380489	0.388522	0.755054	0.711105	1.00598	1.00293	0.294787	0.294787	0.542909	0.419539	0.705213	0.690245	0.755697	0.418177	0.606537	0.72548	0.671247	0.787201	0.593289	0.406711	0.212799	0.27452	0.328753	3.12	0.999338	1976.82	2141.14	810.16	578.84	1181.74
JAC	Standard Jaccard	JAC	65535		ü	24	0.395914	0.378877	0.3873	0.755054	0.712132	1.01008	1.00497	0.295271	0.295271	0.543354	0.419832	0.704729	0.689439	0.755748	0.418849	0.606539	0.724377	0.671537	0.788508	0.590369	0.409631	0.211492	0.275623	0.328463	3.12	0.999338	1978.2	2144.7	816	575.28	1175.9
JAC	Standard Jaccard	JAC	65535		ü	38	0.397435	0.381872	0.389574	0.755037	0.709734	1.0025	1.0012	0.294379	0.294379	0.542536	0.420062	0.705621	0.690936	0.755639	0.417595	0.606514	0.726432	0.671004	0.786049	0.595823	0.404177	0.213951	0.273568	0.328996	3.12	0.999338	1979.28	2138.02	805.12	581.96	1186.78
JAC	Standard Jaccard	JAC	65535		ü	28	0.396494	0.380081	0.388199	0.755027	0.711457	1.00764	1.00376	0.294923	0.294923	0.543036	0.419794	0.705077	0.690041	0.755681	0.41834	0.6065	0.725214	0.67128	0.787458	0.592623	0.407377	0.212542	0.274786	0.32872	3.12	0.999338	1978.02	2141.84	811.5	578.14	1180.4
JAC	Standard Jaccard	JAC	65535		ü	34	0.396821	0.380758	0.388705	0.75501	0.710311	1.00379	1.00185	0.294727	0.294727	0.542855	0.419722	0.705273	0.690379	0.755643	0.418048	0.606482	0.725687	0.671134	0.786866	0.593892	0.406108	0.213134	0.274313	0.328866	3.12	0.999338	1977.68	2140.24	808.98	579.74	1182.92
JAC	Standard Jaccard	JAC	65535		ü	44	0.397884	0.382806	0.39027	0.755009	0.708974	1.00057	1.00024	0.294116	0.294116	0.542293	0.420482	0.705884	0.691403	0.755582	0.41719	0.606479	0.727086	0.670798	0.785224	0.597582	0.402418	0.214776	0.272914	0.329202	3.12	0.999338	1981.26	2135.78	801.64	584.2	1190.26
JAC	Standard Jaccard	JAC	65535		ü	27	0.396169	0.379521	0.387754	0.755004	0.711754	1.00852	1.0042	0.295101	0.295101	0.543199	0.419709	0.704899	0.689761	0.755673	0.418558	0.606472	0.724854	0.671315	0.787832	0.59169	0.40831	0.212168	0.275146	0.328685	3.12	0.999338	1977.62	2142.86	813.36	577.12	1178.54
JAC	Standard Jaccard	JAC	65535		ü	31	0.396491	0.380205	0.388261	0.754986	0.710765	1.00581	1.00285	0.294906	0.294906	0.543022	0.419917	0.705094	0.690103	0.755633	0.418266	0.606446	0.725332	0.671159	0.787229	0.592977	0.407023	0.212771	0.274668	0.328841	3.12	0.999338	1978.6	2141.22	810.8	578.76	1181.1
JAC	Standard Jaccard	JAC	65535		ü	36	0.39698	0.381223	0.38902	0.754949	0.710044	1.00335	1.00163	0.294617	0.294617	0.542756	0.419926	0.705383	0.690612	0.755563	0.417828	0.606398	0.726052	0.670928	0.786303	0.594921	0.405079	0.213697	0.273948	0.329072	3.12	0.999338	1978.64	2138.7	806.92	581.28	1184.98
JAC	Standard Jaccard	JAC	65535		ü	33	0.396644	0.380592	0.388534	0.754947	0.710604	1.00415	1.00202	0.294808	0.294808	0.542932	0.41948	0.705192	0.690296	0.75558	0.418087	0.606396	0.725625	0.671019	0.786803	0.59379	0.40621	0.213197	0.274375	0.328981	3.12	0.999338	1976.54	2140.06	809.18	579.92	1182.72
JAC	Standard Jaccard	JAC	65535		ü	40	0.397266	0.381797	0.389453	0.754938	0.709674	1.00249	1.0012	0.294447	0.294447	0.5426	0.420172	0.705553	0.690899	0.755534	0.417584	0.606384	0.726452	0.670813	0.785807	0.59599	0.40401	0.214193	0.273548	0.329187	3.12	0.999338	1979.8	2137.36	804.78	582.62	1187.12
JAC	Standard Jaccard	JAC	65535		ü	45	0.397608	0.382657	0.39006	0.754857	0.709407	1.00132	1.00062	0.294231	0.294231	0.542399	0.420248	0.705769	0.691329	0.755422	0.417185	0.60628	0.7271	0.670508	0.784875	0.597782	0.402218	0.215125	0.2729	0.329492	3.12	0.999338	1980.16	2134.82	801.22	585.16	1190.68
JAC	Standard Jaccard	JAC	65535		ü	41	0.397298	0.382069	0.389607	0.75485	0.709611	1.00187	1.00089	0.294409	0.294409	0.542565	0.420074	0.705591	0.691034	0.755432	0.417432	0.60627	0.726699	0.670599	0.78533	0.596739	0.403261	0.21467	0.273301	0.329401	3.12	0.999338	1979.34	2136.06	803.3	583.92	1188.6
JAC	Standard Jaccard	JAC	65535		ü	17	0.394733	0.377242	0.385887	0.754789	0.715158	1.01605	1.00794	0.295873	0.295873	0.543912	0.418253	0.704127	0.688621	0.755512	0.419401	0.606195	0.723475	0.671259	0.788996	0.588246	0.411754	0.211004	0.276525	0.328741	3.12	0.999338	1970.76	2146.06	820.2	573.92	1171.7
JAC	Standard Jaccard	JAC	65535		ü	46	0.397399	0.382423	0.389838	0.754789	0.709284	1.00061	1.00025	0.294332	0.294332	0.542493	0.420125	0.705668	0.691212	0.755356	0.417254	0.606193	0.726986	0.670413	0.78486	0.597563	0.402437	0.21514	0.273014	0.329587	3.12	0.999338	1979.58	2134.78	801.66	585.2	1190.24
JAC	Standard Jaccard	JAC	65535		ü	42	0.396962	0.381783	0.389297	0.754711	0.709517	1.00158	1.00074	0.294557	0.294557	0.542701	0.420096	0.705443	0.690892	0.75529	0.417486	0.606092	0.72661	0.670353	0.78513	0.596654	0.403346	0.21487	0.27339	0.329647	3.12	0.999338	1979.44	2135.52	803.46	584.46	1188.44
JAC	Standard Jaccard	JAC	65535		ü	22	0.3949	0.377788	0.386248	0.754706	0.713231	1.01253	1.00619	0.295754	0.295754	0.5438	0.419488	0.704246	0.688894	0.755406	0.419148	0.60609	0.72389	0.67101	0.788322	0.589466	0.410534	0.211678	0.27611	0.32899	3.12	0.999338	1976.58	2144.2	817.78	575.78	1174.12
JAC	Standard Jaccard	JAC	65535		ü	43	0.396951	0.381814	0.389307	0.754685	0.709636	1.0018	1.00085	0.294562	0.294562	0.542705	0.420066	0.705438	0.690907	0.755262	0.417464	0.606058	0.726645	0.670306	0.785035	0.596779	0.403221	0.214965	0.273355	0.329694	3.12	0.999338	1979.3	2135.26	803.22	584.72	1188.68
JAC	Standard Jaccard	JAC	65535		ü	47	0.397146	0.382209	0.389604	0.75468	0.709487	1.00107	1.00048	0.294447	0.294447	0.542601	0.419981	0.705553	0.691104	0.755245	0.417298	0.606051	0.726917	0.670229	0.784705	0.597503	0.402497	0.215295	0.273083	0.329771	3.12	0.999338	1978.9	2134.36	801.78	585.62	1190.12
JAC	Standard Jaccard	JAC	65535		ü	48	0.397273	0.382475	0.389802	0.754673	0.709509	1.00094	1.00042	0.294371	0.294371	0.54253	0.419883	0.705629	0.691237	0.75523	0.417181	0.606041	0.727106	0.670167	0.784468	0.598007	0.401993	0.215532	0.272894	0.329833	3.12	0.999338	1978.44	2133.72	800.78	586.26	1191.12
JAC	Standard Jaccard	JAC	65535		ü	18	0.394722	0.377534	0.386031	0.75467	0.714199	1.0143	1.00707	0.295844	0.295844	0.543883	0.418856	0.704156	0.688767	0.755375	0.419228	0.606043	0.723754	0.670969	0.788407	0.589128	0.410872	0.211593	0.276246	0.329031	3.12	0.999338	1973.6	2144.46	818.46	575.52	1173.44
JAC	Standard Jaccard	JAC	65535		ü	49	0.396957	0.382214	0.389514	0.754532	0.709751	1.00129	1.0006	0.294515	0.294515	0.542662	0.419743	0.705485	0.691107	0.755086	0.417227	0.60586	0.727031	0.669926	0.78425	0.597964	0.402036	0.21575	0.272969	0.330074	3.12	0.999338	1977.78	2133.12	800.86	586.86	1191.04
JAC	Standard Jaccard	JAC	65535		ü	51	0.39698	0.382348	0.389594	0.75449	0.7097	1.00115	1.00052	0.294494	0.294494	0.542642	0.419701	0.705506	0.691174	0.755037	0.417153	0.605806	0.72715	0.669829	0.78402	0.598327	0.401673	0.21598	0.27285	0.330171	3.12	0.999338	1977.58	2132.5	800.14	587.48	1191.76
JAC	Standard Jaccard	JAC	65535		ü	21	0.394239	0.377066	0.385555	0.754484	0.713669	1.013	1.00642	0.296073	0.296073	0.544086	0.419051	0.703927	0.688533	0.755189	0.419343	0.605809	0.723564	0.670675	0.788224	0.588842	0.411158	0.211776	0.276436	0.329325	3.12	0.999338	1974.52	2143.94	819.02	576.04	1172.88
JAC	Standard Jaccard	JAC	65535		ü	50	0.39667	0.381966	0.389247	0.754409	0.709929	1.00129	1.0006	0.294647	0.294647	0.542783	0.41945	0.705353	0.690983	0.754961	0.417278	0.605701	0.726947	0.669723	0.784081	0.597885	0.402115	0.215919	0.273053	0.330277	3.12	0.999338	1976.4	2132.66	801.02	587.32	1190.88
JAC	Standard Jaccard	JAC	65535		ü	19	0.394034	0.376926	0.385383	0.754393	0.714424	1.01399	1.00692	0.296153	0.296153	0.544167	0.41844	0.703847	0.688463	0.755093	0.419363	0.605686	0.723538	0.670496	0.788049	0.588877	0.411123	0.211951	0.276462	0.329504	3.12	0.999338	1971.64	2143.48	818.94	576.5	1172.96
JAC	Standard Jaccard	JAC	65535		ü	16	0.393414	0.376001	0.384607	0.754284	0.716449	1.01825	1.00903	0.296489	0.296489	0.544479	0.41726	0.703511	0.688001	0.755006	0.419695	0.60554	0.722994	0.67042	0.788464	0.587537	0.412463	0.211536	0.277006	0.32958	3.12	0.999338	1966.08	2144.58	821.62	575.4	1170.28
JAC	Standard Jaccard	JAC	65535		ü	52	0.396487	0.381963	0.389156	0.754259	0.709976	1.00144	1.00067	0.294719	0.294719	0.542849	0.419421	0.705281	0.690981	0.754802	0.417212	0.605508	0.727051	0.669436	0.783639	0.598323	0.401677	0.216361	0.272949	0.330564	3.12	0.999338	1976.26	2131.46	800.16	588.52	1191.74
JAC	Standard Jaccard	JAC	65535		ü	53	0.396429	0.38196	0.389126	0.754213	0.709865	1.00135	1.00062	0.29474	0.29474	0.542869	0.419522	0.70526	0.69098	0.754753	0.417193	0.60545	0.727081	0.669347	0.783504	0.598456	0.401544	0.216496	0.272919	0.330653	3.12	0.999338	1976.74	2131.1	799.9	588.88	1192
JAC	Standard Jaccard	JAC	65535		ü	20	0.393706	0.376737	0.385126	0.754208	0.714293	1.01399	1.00692	0.296302	0.296302	0.5443	0.418623	0.703698	0.688369	0.754902	0.419362	0.605451	0.723534	0.670172	0.787659	0.589078	0.410922	0.212341	0.276466	0.329828	3.12	0.999338	1972.5	2142.4	818.56	577.58	1173.34
JAC	Standard Jaccard	JAC	65535		ü	54	0.396451	0.382039	0.389177	0.754193	0.709704	1.00086	1.00038	0.294723	0.294723	0.542853	0.419539	0.705277	0.69102	0.754729	0.417153	0.605425	0.727147	0.669304	0.783383	0.598656	0.401344	0.216617	0.272853	0.330696	3.12	0.999338	1976.82	2130.78	799.5	589.2	1192.4
JAC	Standard Jaccard	JAC	65535		ü	55	0.396167	0.381856	0.388944	0.754038	0.709853	1.00118	1.00053	0.29485	0.29485	0.542968	0.41945	0.70515	0.690928	0.754568	0.417162	0.605227	0.727131	0.669036	0.783068	0.598787	0.401213	0.216932	0.272869	0.330964	3.12	0.999338	1976.4	2129.92	799.24	590.06	1192.66
JAC	Standard Jaccard	JAC	65535		ü	56	0.395626	0.381435	0.388464	0.753784	0.710031	1.00147	1.00068	0.295097	0.295097	0.543196	0.419272	0.704903	0.690717	0.754309	0.417226	0.604899	0.727026	0.6686	0.782645	0.59879	0.40121	0.217355	0.272974	0.3314	3.12	0.999338	1975.56	2128.76	799.24	591.22	1192.66
JAC	Standard Jaccard	JAC	65535		ü	14	0.392091	0.374967	0.383432	0.753679	0.717913	1.02295	1.01136	0.297079	0.297079	0.54502	0.417031	0.702921	0.687484	0.754386	0.419861	0.604762	0.722719	0.669371	0.787468	0.587499	0.412501	0.212532	0.277281	0.330629	3.12	0.999338	1965	2141.88	821.7	578.1	1170.2
JAC	Standard Jaccard	JAC	65535		ü	15	0.391712	0.374372	0.382942	0.75362	0.717629	1.02101	1.0104	0.297283	0.297283	0.545203	0.416704	0.702717	0.687186	0.754342	0.420075	0.60469	0.722366	0.669346	0.787762	0.58661	0.41339	0.212238	0.277634	0.330654	3.12	0.999338	1963.46	2142.68	823.46	577.3	1168.44
JAC	Standard Jaccard	JAC	65535		ü	57	0.395222	0.381158	0.388125	0.753574	0.710235	1.00175	1.00082	0.295275	0.295275	0.54336	0.419115	0.704725	0.690579	0.754092	0.417251	0.604629	0.726986	0.668237	0.782237	0.598921	0.401079	0.217763	0.273014	0.331763	3.12	0.999338	1974.82	2127.66	798.98	592.32	1192.92
JAC	Standard Jaccard	JAC	65535		ü	58	0.395159	0.381142	0.388086	0.753531	0.7104	1.00155	1.00072	0.2953	0.2953	0.543383	0.418814	0.7047	0.690571	0.754047	0.417238	0.604574	0.727007	0.668152	0.782121	0.599021	0.400979	0.217879	0.272993	0.331848	3.12	0.999338	1973.4	2127.34	798.78	592.64	1193.12
JAC	Standard Jaccard	JAC	65535		ü	59	0.395125	0.381145	0.388071	0.753501	0.710358	1.00183	1.00086	0.295313	0.295313	0.543394	0.419005	0.704687	0.690573	0.754015	0.417223	0.604536	0.727032	0.668093	0.782027	0.599118	0.400882	0.217973	0.272968	0.331907	3.12	0.999338	1974.3	2127.08	798.58	592.9	1193.32
JAC	Standard Jaccard	JAC	65535		ü	60	0.394841	0.380923	0.387818	0.753371	0.710617	1.00232	1.00111	0.29544	0.29544	0.54351	0.418814	0.70456	0.690461	0.753882	0.417258	0.604369	0.726973	0.667867	0.781813	0.599109	0.400891	0.218187	0.273027	0.332133	3.12	0.999338	1973.4	2126.5	798.6	593.48	1193.3
JAC	Standard Jaccard	JAC	65535		ü	62	0.394928	0.381122	0.387962	0.75335	0.710659	1.00207	1.00098	0.29539	0.29539	0.543462	0.418703	0.70461	0.690561	0.753854	0.417164	0.604343	0.727126	0.667802	0.781593	0.59953	0.40047	0.218407	0.272874	0.332198	3.12	0.999338	1972.88	2125.9	797.76	594.08	1194.14
JAC	Standard Jaccard	JAC	65535		ü	61	0.394796	0.380964	0.387817	0.753313	0.710621	1.00207	1.00098	0.295453	0.295453	0.543521	0.418712	0.704547	0.690482	0.753819	0.417215	0.604295	0.727044	0.667752	0.781606	0.599358	0.400642	0.218394	0.272956	0.332248	3.12	0.999338	1972.92	2125.94	798.1	594.04	1193.8
JAC	Standard Jaccard	JAC	65535		ü	13	0.390686	0.37328	0.381882	0.753265	0.719645	1.02673	1.01323	0.297775	0.297775	0.54566	0.416101	0.702225	0.68664	0.753993	0.420373	0.604229	0.721879	0.668807	0.787563	0.585717	0.414283	0.212437	0.278121	0.331193	3.12	0.999338	1960.62	2142.14	825.24	577.84	1166.66
JAC	Standard Jaccard	JAC	65535		ü	63	0.394619	0.380806	0.38765	0.753239	0.710787	1.00246	1.00118	0.295534	0.295534	0.543597	0.418652	0.704466	0.690403	0.753744	0.417248	0.604199	0.72699	0.667629	0.781509	0.599297	0.400703	0.218491	0.27301	0.332371	3.12	0.999338	1972.64	2125.68	798.22	594.3	1193.68
JAC	Standard Jaccard	JAC	65535		ü	65	0.394649	0.380968	0.387747	0.753187	0.710748	1.00246	1.00118	0.295513	0.295513	0.543576	0.418703	0.704487	0.690484	0.753685	0.417159	0.604133	0.727134	0.667515	0.781234	0.599735	0.400265	0.218766	0.272866	0.332485	3.12	0.999338	1972.88	2124.92	797.36	595.06	1194.54
JAC	Standard Jaccard	JAC	65535		ü	64	0.39456	0.380849	0.387642	0.753169	0.710859	1.00254	1.00122	0.295555	0.295555	0.543615	0.418563	0.704445	0.690425	0.753668	0.4172	0.604109	0.727068	0.667491	0.781268	0.599581	0.400419	0.218732	0.272932	0.332509	3.12	0.999338	1972.22	2125.02	797.66	594.96	1194.24
JAC	Standard Jaccard	JAC	65535		ü	66	0.394558	0.380893	0.387664	0.753147	0.710884	1.00233	1.00111	0.295555	0.295555	0.543615	0.418474	0.704445	0.690447	0.753645	0.417172	0.604081	0.727111	0.667447	0.781176	0.599718	0.400282	0.218824	0.272889	0.332553	3.12	0.999338	1971.8	2124.76	797.4	595.22	1194.5
JAC	Standard Jaccard	JAC	65535		ü	69	0.394589	0.381076	0.387773	0.753087	0.710969	1.00255	1.00122	0.295525	0.295525	0.543588	0.418449	0.704475	0.690538	0.753576	0.41707	0.604005	0.727279	0.66731	0.78085	0.600226	0.399774	0.21915	0.272721	0.33269	3.12	0.999338	1971.68	2123.88	796.38	596.1	1195.52
JAC	Standard Jaccard	JAC	65535		ü	67	0.394342	0.380777	0.387499	0.753014	0.710952	1.00257	1.00124	0.295648	0.295648	0.5437	0.418478	0.704352	0.690389	0.753506	0.417163	0.603913	0.727126	0.667216	0.780871	0.599906	0.400094	0.219129	0.272874	0.332784	3.12	0.999338	1971.82	2123.94	797.02	596.04	1194.88
JAC	Standard Jaccard	JAC	65535		ü	68	0.394337	0.380832	0.387524	0.752988	0.711037	1.00268	1.00129	0.295644	0.295644	0.543696	0.41841	0.704356	0.690416	0.753477	0.417128	0.603878	0.727184	0.667152	0.780748	0.600085	0.399915	0.219252	0.272816	0.332848	3.12	0.999338	1971.5	2123.6	796.66	596.38	1195.24
JAC	Standard Jaccard	JAC	65535		ü	70	0.394387	0.38098	0.387624	0.752961	0.711037	1.00267	1.00128	0.29561	0.29561	0.543668	0.418415	0.70439	0.69049	0.753444	0.417055	0.603841	0.727306	0.667081	0.780547	0.600433	0.399567	0.219453	0.272694	0.332919	3.12	0.999338	1971.52	2123.06	795.96	596.92	1195.94
JAC	Standard Jaccard	JAC	-1			34	0.398368	0.388065	0.393181	0.752944	0.708775	0.990531	0.995196	0.293492	0.293492	0.541715	0.417129	0.706508	0.694033	0.75326	0.414002	0.603822	0.732259	0.666109	0.774895	0.61317	0.38683	0.225105	0.267741	0.333891	3.12	0.999338	1965.46	2107.68	770.6	612.3	1221.3
JAC	Standard Jaccard	JAC	65535		ü	73	0.394534	0.381306	0.387862	0.752924	0.711037	1.0026	1.00125	0.295529	0.295529	0.543594	0.418355	0.704471	0.690653	0.753397	0.416904	0.603795	0.727553	0.666981	0.780188	0.601118	0.398882	0.219812	0.272447	0.333019	3.12	0.999338	1971.24	2122.08	794.6	597.9	1197.3
JAC	Standard Jaccard	JAC	65535		ü	72	0.394436	0.381206	0.387763	0.75289	0.711016	1.0027	1.0013	0.295576	0.295576	0.543636	0.418474	0.704424	0.690603	0.753363	0.416931	0.603751	0.727508	0.666928	0.780166	0.60104	0.39896	0.219834	0.272492	0.333072	3.12	0.999338	1971.8	2122.02	794.76	597.96	1197.14
JAC	Standard Jaccard	JAC	65535		ü	71	0.394227	0.380938	0.387524	0.752842	0.711075	1.00266	1.00128	0.295678	0.295678	0.54373	0.418338	0.704322	0.690469	0.753319	0.417021	0.603689	0.727361	0.666867	0.780231	0.600707	0.399293	0.219769	0.272639	0.333133	3.12	0.999338	1971.16	2122.2	795.42	597.78	1196.48
JAC	Standard Jaccard	JAC	-1			38	0.397984	0.387676	0.392795	0.752801	0.708732	0.990565	0.995219	0.29367	0.29367	0.54188	0.417226	0.70633	0.693838	0.753117	0.414106	0.603638	0.732093	0.66589	0.774773	0.612903	0.387097	0.225227	0.267907	0.33411	3.12	0.999338	1965.92	2107.36	771.12	612.62	1220.78
JAC	Standard Jaccard	JAC	-1			35	0.397806	0.387409	0.392571	0.752776	0.708796	0.990569	0.995214	0.293764	0.293764	0.541963	0.417107	0.706236	0.693704	0.753097	0.41421	0.603609	0.731921	0.665884	0.774915	0.612494	0.387506	0.225085	0.268079	0.334116	3.12	0.999338	1965.36	2107.74	771.94	612.24	1219.96
JAC	Standard Jaccard	JAC	-1			36	0.397703	0.387246	0.392439	0.752768	0.708703	0.990349	0.995103	0.293815	0.293815	0.542011	0.417141	0.706185	0.693623	0.753092	0.414278	0.603598	0.731814	0.665889	0.775017	0.612229	0.387771	0.224983	0.268186	0.334111	3.12	0.999338	1965.52	2108.02	772.46	611.96	1219.44
JAC	Standard Jaccard	JAC	-1			33	0.397821	0.387507	0.392629	0.752743	0.709	0.991274	0.995571	0.293747	0.293747	0.54195	0.417099	0.706253	0.693753	0.753059	0.414153	0.603564	0.732019	0.665802	0.774731	0.612776	0.387224	0.225269	0.267981	0.334198	3.12	0.999338	1965.32	2107.24	771.36	612.74	1220.54
JAC	Standard Jaccard	JAC	65535		ü	74	0.394116	0.380976	0.387489	0.752725	0.711317	1.00289	1.00139	0.29572	0.29572	0.543769	0.418075	0.70428	0.690488	0.753193	0.416955	0.603539	0.727469	0.666647	0.779856	0.60112	0.39888	0.220144	0.272531	0.333353	3.12	0.999338	1969.92	2121.18	794.6	598.8	1197.3
JAC	Standard Jaccard	JAC	-1			37	0.397524	0.387074	0.392263	0.7527	0.708872	0.990909	0.995388	0.2939	0.2939	0.54209	0.417192	0.7061	0.693537	0.753024	0.414321	0.603509	0.731745	0.66578	0.774952	0.612122	0.387878	0.225048	0.268255	0.33422	3.12	0.999338	1965.76	2107.84	772.68	612.14	1219.22
JAC	Standard Jaccard	JAC	65535		ü	11	0.389113	0.371844	0.380379	0.752645	0.721865	1.03276	1.01619	0.298497	0.298497	0.54632	0.415375	0.701503	0.685922	0.753368	0.420691	0.603431	0.72135	0.667762	0.786833	0.585012	0.414988	0.213167	0.27865	0.332238	3.12	0.999338	1957.2	2140.16	826.66	579.82	1165.24
JAC	Standard Jaccard	JAC	-1			39	0.39771	0.387497	0.392569	0.75264	0.708876	0.990412	0.99514	0.293798	0.293798	0.541995	0.417039	0.706202	0.693749	0.752952	0.414109	0.603433	0.732086	0.665624	0.774441	0.613056	0.386944	0.225559	0.267914	0.334376	3.12	0.999338	1965.04	2106.46	770.82	613.52	1221.08
JAC	Standard Jaccard	JAC	65535		ü	75	0.393868	0.380742	0.387248	0.752627	0.711572	1.00342	1.00166	0.295835	0.295835	0.543874	0.417931	0.704165	0.690371	0.753095	0.41701	0.603413	0.727381	0.666487	0.779746	0.600996	0.399004	0.220254	0.272619	0.333513	3.12	0.999338	1969.24	2120.88	794.84	599.1	1197.06
JAC	Standard Jaccard	JAC	-1			40	0.397589	0.387421	0.392471	0.752572	0.708936	0.990378	0.995122	0.293853	0.293853	0.542044	0.41692	0.706147	0.693711	0.752883	0.414108	0.603348	0.732084	0.665505	0.774303	0.613119	0.386881	0.225697	0.267916	0.334495	3.12	0.999338	1964.48	2106.08	770.7	613.9	1221.2
JAC	Standard Jaccard	JAC	-1			32	0.397502	0.387298	0.392365	0.752558	0.709216	0.991719	0.995794	0.293895	0.293895	0.542087	0.416955	0.706105	0.693649	0.75287	0.414157	0.603327	0.732009	0.665492	0.774355	0.612943	0.387057	0.225645	0.267991	0.334508	3.12	0.999338	1964.64	2106.22	771.04	613.76	1220.86
JAC	Standard Jaccard	JAC	65535		ü	76	0.393685	0.380635	0.387103	0.752522	0.711703	1.00361	1.00175	0.295916	0.295916	0.543948	0.417833	0.704084	0.690317	0.752986	0.417008	0.603278	0.727383	0.666302	0.779518	0.601116	0.398884	0.220482	0.272617	0.333698	3.12	0.999338	1968.78	2120.26	794.6	599.72	1197.3
JAC	Standard Jaccard	JAC	-1			41	0.397435	0.387306	0.392337	0.752499	0.709106	0.991049	0.995462	0.293921	0.293921	0.542112	0.416954	0.706079	0.693653	0.752808	0.414125	0.603249	0.732061	0.665374	0.774171	0.613135	0.386865	0.225829	0.267939	0.334626	3.12	0.999338	1964.64	2105.72	770.66	614.26	1221.24
JAC	Standard Jaccard	JAC	-1			42	0.397447	0.387334	0.392357	0.752487	0.708842	0.990191	0.995029	0.293917	0.293917	0.542107	0.417001	0.706083	0.693667	0.752795	0.414107	0.603235	0.732089	0.665359	0.774117	0.613218	0.386782	0.225883	0.267911	0.334641	3.12	0.999338	1964.86	2105.58	770.5	614.4	1221.4
JAC	Standard Jaccard	JAC	65535		ü	77	0.393383	0.380357	0.386814	0.752398	0.711767	1.00366	1.00178	0.296056	0.296056	0.544077	0.417761	0.703944	0.690179	0.752861	0.41707	0.603119	0.72728	0.666103	0.77937	0.600988	0.399012	0.22063	0.27272	0.333897	3.12	0.999338	1968.44	2119.86	794.86	600.12	1197.04
JAC	Standard Jaccard	JAC	65535		ü	78	0.393243	0.380212	0.386671	0.752344	0.711873	1.00366	1.00178	0.296124	0.296124	0.544138	0.417651	0.703876	0.690106	0.752808	0.417108	0.603051	0.727218	0.666025	0.779326	0.600886	0.399114	0.220674	0.272782	0.333975	3.12	0.999338	1967.92	2119.74	795.06	600.24	1196.84
JAC	Standard Jaccard	JAC	65535		ü	12	0.388373	0.371243	0.37971	0.752312	0.721198	1.03153	1.01559	0.298832	0.298832	0.546625	0.415724	0.701168	0.685622	0.753029	0.420794	0.603005	0.721179	0.667193	0.786312	0.584931	0.415069	0.213688	0.278821	0.332807	3.12	0.999338	1958.84	2138.74	826.82	581.24	1165.08
JAC	Standard Jaccard	JAC	65535		ü	79	0.393173	0.38019	0.386625	0.752293	0.711822	1.00335	1.00162	0.296153	0.296153	0.544165	0.417566	0.703847	0.690095	0.752754	0.417095	0.602986	0.727239	0.665934	0.779192	0.600997	0.399003	0.220808	0.272761	0.334066	3.12	0.999338	1967.52	2119.38	794.84	600.6	1197.06
JAC	Standard Jaccard	JAC	-1			43	0.396805	0.386641	0.391688	0.752264	0.709191	0.990905	0.99539	0.294227	0.294227	0.542392	0.416853	0.705773	0.69332	0.752574	0.414309	0.602948	0.731763	0.665042	0.774007	0.612634	0.387366	0.225993	0.268237	0.334958	3.12	0.999338	1964.16	2105.28	771.66	614.7	1220.24
JAC	Standard Jaccard	JAC	65535		ü	80	0.393085	0.380146	0.38656	0.75224	0.711971	1.00373	1.00181	0.296192	0.296192	0.544201	0.417545	0.703808	0.690073	0.752699	0.41709	0.602917	0.727248	0.665837	0.779069	0.601078	0.398922	0.220931	0.272752	0.334163	3.12	0.999338	1967.42	2119.04	794.68	600.94	1197.22
JAC	Standard Jaccard	JAC	-1			45	0.396785	0.38667	0.391693	0.75224	0.709263	0.990815	0.995342	0.294231	0.294231	0.5424	0.416704	0.705769	0.693335	0.752549	0.414282	0.602912	0.731809	0.664976	0.773907	0.612763	0.387237	0.226093	0.268191	0.335024	3.12	0.999338	1963.46	2105	771.4	614.98	1220.5
JAC	Standard Jaccard	JAC	-1			31	0.396717	0.386601	0.391625	0.752218	0.709551	0.992428	0.996148	0.294265	0.294265	0.542424	0.416865	0.705735	0.693301	0.752527	0.414299	0.60289	0.731776	0.664941	0.773897	0.612704	0.387296	0.226103	0.268224	0.335059	3.12	0.999338	1964.22	2104.96	771.52	615.02	1220.38
JAC	Standard Jaccard	JAC	65535		ü	81	0.393041	0.380136	0.386533	0.752211	0.712039	1.00384	1.00187	0.296209	0.296209	0.544217	0.417519	0.703791	0.690068	0.752668	0.417081	0.602879	0.727263	0.665778	0.778987	0.601149	0.398851	0.221013	0.272737	0.334222	3.12	0.999338	1967.3	2118.82	794.54	601.16	1197.36
JAC	Standard Jaccard	JAC	-1			44	0.396599	0.386443	0.391487	0.75218	0.709297	0.991087	0.995478	0.294324	0.294324	0.542483	0.416797	0.705676	0.693221	0.752491	0.414356	0.60284	0.73169	0.664909	0.773914	0.612529	0.387471	0.226086	0.26831	0.335091	3.12	0.999338	1963.9	2105.02	771.86	614.96	1220.04
JAC	Standard Jaccard	JAC	-1			46	0.396741	0.386712	0.391693	0.752171	0.709182	0.990667	0.995267	0.294248	0.294248	0.542414	0.41681	0.705752	0.693356	0.752475	0.414235	0.602827	0.731883	0.664857	0.773676	0.613037	0.386963	0.226324	0.268117	0.335143	3.12	0.999338	1963.96	2104.38	770.86	615.6	1221.04
JAC	Standard Jaccard	JAC	65535		ü	82	0.392934	0.380087	0.386455	0.752142	0.71217	1.00385	1.00187	0.296255	0.296255	0.54426	0.417337	0.703745	0.690043	0.752597	0.417072	0.602791	0.727277	0.665657	0.778826	0.601261	0.398739	0.221174	0.272723	0.334343	3.12	0.999338	1966.44	2118.38	794.32	601.6	1197.58
JAC	Standard Jaccard	JAC	65535		ü	83	0.392982	0.380243	0.386558	0.752106	0.711907	1.00371	1.0018	0.296226	0.296226	0.544232	0.417638	0.703774	0.690121	0.752554	0.416991	0.602745	0.727409	0.665573	0.778598	0.601644	0.398356	0.221402	0.272591	0.334427	3.12	0.999338	1967.86	2117.76	793.56	602.22	1198.34
JAC	Standard Jaccard	JAC	65535		ü	84	0.392927	0.380229	0.386525	0.752069	0.711915	1.00359	1.00174	0.296247	0.296247	0.54425	0.417595	0.703753	0.690115	0.752515	0.416979	0.602698	0.727427	0.6655	0.778495	0.601734	0.398266	0.221505	0.272573	0.3345	3.12	0.999338	1967.66	2117.48	793.38	602.5	1198.52
JAC	Standard Jaccard	JAC	65535		ü	85	0.392946	0.380286	0.386563	0.752059	0.711937	1.0036	1.00175	0.296234	0.296234	0.54424	0.41757	0.703766	0.690143	0.752503	0.41695	0.602684	0.727474	0.665472	0.778421	0.601865	0.398135	0.221579	0.272526	0.334528	3.12	0.999338	1967.54	2117.28	793.12	602.7	1198.78
JAC	Standard Jaccard	JAC	65535		ü	86	0.392765	0.380157	0.386408	0.751966	0.712039	1.00385	1.00187	0.296315	0.296315	0.544313	0.417528	0.703685	0.690078	0.752407	0.416963	0.602566	0.727453	0.665311	0.778244	0.601912	0.398088	0.221756	0.272547	0.334689	3.12	0.999338	1967.34	2116.8	793.02	603.18	1198.88
JAC	Standard Jaccard	JAC	-1			52	0.396147	0.386167	0.391124	0.751917	0.709798	0.992148	0.996014	0.294532	0.294532	0.542672	0.416432	0.705468	0.693084	0.75222	0.414357	0.602504	0.731682	0.664465	0.773365	0.612802	0.387198	0.226635	0.268318	0.335535	3.12	0.999338	1962.18	2103.52	771.34	616.46	1220.56
JAC	Standard Jaccard	JAC	65535		ü	89	0.392722	0.38019	0.386404	0.75191	0.712043	1.00367	1.00178	0.296332	0.296332	0.544328	0.417434	0.703668	0.690095	0.752347	0.416925	0.602494	0.727514	0.665207	0.778055	0.602135	0.397865	0.221945	0.272486	0.334793	3.12	0.999338	1966.9	2116.28	792.58	603.7	1199.32
JAC	Standard Jaccard	JAC	-1			29	0.396152	0.386198	0.391142	0.751907	0.709899	0.993371	0.996622	0.294528	0.294528	0.542668	0.416831	0.705472	0.693099	0.752209	0.414339	0.60249	0.731717	0.664435	0.773305	0.612893	0.387107	0.226695	0.268283	0.335565	3.12	0.999338	1964.06	2103.34	771.14	616.64	1220.76
JAC	Standard Jaccard	JAC	65535		ü	88	0.392661	0.380114	0.386335	0.751895	0.71206	1.00379	1.00184	0.296361	0.296361	0.544355	0.417455	0.703639	0.690057	0.752333	0.416951	0.602475	0.727473	0.665188	0.77807	0.602044	0.397956	0.22193	0.272527	0.334812	3.12	0.999338	1967	2116.32	792.76	603.66	1199.14
JAC	Standard Jaccard	JAC	-1			30	0.395852	0.385712	0.390748	0.751891	0.709734	0.993256	0.996567	0.294681	0.294681	0.542811	0.416929	0.705319	0.692856	0.752203	0.414541	0.602466	0.731393	0.664459	0.773636	0.612077	0.387923	0.226364	0.268607	0.335541	3.12	0.999338	1964.52	2104.24	772.76	615.74	1219.14
JAC	Standard Jaccard	JAC	-1			51	0.396006	0.38601	0.390975	0.751874	0.709904	0.991711	0.995792	0.2946	0.2946	0.542734	0.416156	0.7054	0.693005	0.752178	0.414404	0.602449	0.731602	0.664404	0.773363	0.612647	0.387353	0.226637	0.268398	0.335596	3.12	0.999338	1960.88	2103.52	771.66	616.46	1220.24
JAC	Standard Jaccard	JAC	65535		ü	87	0.392588	0.380033	0.386259	0.751873	0.712196	1.00401	1.00195	0.296395	0.296395	0.544387	0.417383	0.703605	0.690017	0.752312	0.416975	0.602447	0.727434	0.665155	0.778069	0.601964	0.398036	0.221931	0.272566	0.334845	3.12	0.999338	1966.66	2116.32	792.92	603.66	1198.98
JAC	Standard Jaccard	JAC	-1			47	0.395992	0.385981	0.390953	0.75187	0.70976	0.99127	0.99557	0.294604	0.294604	0.542743	0.41622	0.705396	0.69299	0.752173	0.414417	0.602441	0.73159	0.664402	0.773365	0.612615	0.387385	0.226635	0.26841	0.335598	3.12	0.999338	1961.18	2103.54	771.7	616.44	1220.2
JAC	Standard Jaccard	JAC	-1			24	0.396064	0.386209	0.391104	0.751824	0.710672	0.99534	0.997613	0.294557	0.294557	0.542694	0.416606	0.705443	0.693105	0.75212	0.414291	0.602384	0.731796	0.664269	0.773036	0.613173	0.386827	0.226964	0.268204	0.335731	3.12	0.999338	1963	2102.62	770.56	617.36	1221.34
JAC	Standard Jaccard	JAC	65535		ü	90	0.392507	0.379999	0.386201	0.751815	0.712242	1.00372	1.00181	0.296433	0.296433	0.54442	0.41718	0.703567	0.689999	0.752252	0.416964	0.602375	0.727449	0.665058	0.77793	0.602069	0.397931	0.22207	0.272551	0.334942	3.12	0.999338	1965.7	2115.94	792.72	604.04	1199.18
JAC	Standard Jaccard	JAC	65535		ü	92	0.392592	0.380193	0.386341	0.751796	0.712268	1.00376	1.00183	0.296383	0.296383	0.544373	0.417188	0.703617	0.690097	0.752227	0.416873	0.60235	0.727599	0.664993	0.777717	0.602476	0.397524	0.222283	0.272401	0.335007	3.12	0.999338	1965.74	2115.36	791.9	604.62	1200
JAC	Standard Jaccard	JAC	-1			53	0.395938	0.386041	0.390957	0.751795	0.709891	0.992242	0.996063	0.294625	0.294625	0.542759	0.416381	0.705375	0.693021	0.752094	0.414356	0.602346	0.731686	0.664252	0.773101	0.612941	0.387059	0.226899	0.268314	0.335748	3.12	0.999338	1961.94	2102.8	771.06	617.18	1220.84
JAC	Standard Jaccard	JAC	-1			23	0.396	0.386185	0.391061	0.751775	0.710816	0.995153	0.997523	0.294587	0.294587	0.542722	0.416386	0.705413	0.693093	0.752069	0.414283	0.602323	0.731808	0.664192	0.772918	0.613267	0.386733	0.227082	0.268192	0.335808	3.12	0.999338	1961.96	2102.3	770.38	617.68	1221.52
JAC	Standard Jaccard	JAC	-1			55	0.395787	0.385951	0.390837	0.751711	0.710057	0.992738	0.996311	0.294693	0.294693	0.542824	0.416301	0.705307	0.692975	0.752008	0.414358	0.602236	0.731684	0.664104	0.772926	0.613024	0.386976	0.227074	0.268316	0.335896	3.12	0.999338	1961.56	2102.32	770.9	617.66	1221
JAC	Standard Jaccard	JAC	65535		ü	93	0.392415	0.380058	0.386186	0.751708	0.712259	1.00377	1.00183	0.296463	0.296463	0.544448	0.417192	0.703537	0.690029	0.752136	0.416891	0.602236	0.727569	0.664846	0.777561	0.602497	0.397503	0.222439	0.272431	0.335154	3.12	0.999338	1965.76	2114.94	791.86	605.04	1200.04
JAC	Standard Jaccard	JAC	-1			22	0.395967	0.386298	0.391101	0.751694	0.711113	0.996078	0.997984	0.294596	0.294596	0.542729	0.416373	0.705404	0.693149	0.751982	0.414193	0.602217	0.73195	0.664017	0.772592	0.613707	0.386293	0.227408	0.26805	0.335983	3.12	0.999338	1961.9	2101.4	769.52	618.58	1222.38
JAC	Standard Jaccard	JAC	65535		ü	91	0.392315	0.379927	0.38607	0.751685	0.712289	1.00382	1.00186	0.296514	0.296514	0.544493	0.417158	0.703486	0.689964	0.752115	0.416936	0.602208	0.727494	0.664821	0.777598	0.602329	0.397671	0.222402	0.272506	0.335179	3.12	0.999338	1965.6	2115.04	792.2	604.94	1199.7
JAC	Standard Jaccard	JAC	-1			54	0.395786	0.386005	0.390863	0.751676	0.709891	0.99231	0.996097	0.294693	0.294693	0.542823	0.416373	0.705307	0.693002	0.75197	0.414318	0.602191	0.731748	0.664038	0.772781	0.613224	0.386776	0.227219	0.268252	0.335962	3.12	0.999338	1961.9	2101.92	770.5	618.06	1221.4
JAC	Standard Jaccard	JAC	-1			48	0.395465	0.38545	0.390424	0.751667	0.710057	0.991873	0.995874	0.294859	0.294859	0.542977	0.416042	0.705141	0.692725	0.751972	0.414557	0.602181	0.731363	0.664102	0.773192	0.612257	0.387743	0.226808	0.268637	0.335898	3.12	0.999338	1960.34	2103.06	772.42	616.92	1219.48
JAC	Standard Jaccard	JAC	-1			25	0.395742	0.385986	0.390832	0.751644	0.710205	0.994389	0.997133	0.29471	0.29471	0.542836	0.416891	0.70529	0.692993	0.751937	0.414307	0.602151	0.731771	0.663971	0.772689	0.613297	0.386703	0.227311	0.268229	0.336029	3.12	0.999338	1964.34	2101.66	770.32	618.32	1221.58
JAC	Standard Jaccard	JAC	-1			28	0.395506	0.385581	0.39051	0.751638	0.710184	0.994096	0.99699	0.294838	0.294838	0.542953	0.416785	0.705162	0.69279	0.75194	0.414483	0.602145	0.731481	0.664025	0.773003	0.612577	0.387423	0.226997	0.268519	0.335975	3.12	0.999338	1963.84	2102.52	771.78	617.46	1220.12
JAC	Standard Jaccard	JAC	-1			56	0.395742	0.386006	0.390842	0.751633	0.710167	0.992721	0.996304	0.29471	0.29471	0.542841	0.416152	0.70529	0.693003	0.751925	0.414299	0.602134	0.731781	0.663961	0.772652	0.613353	0.386647	0.227348	0.268219	0.336039	3.12	0.999338	1960.86	2101.58	770.24	618.4	1221.66
JAC	Standard Jaccard	JAC	65535		ü	94	0.392239	0.37992	0.386029	0.751621	0.712416	1.00407	1.00198	0.296544	0.296544	0.544521	0.417082	0.703456	0.68996	0.752047	0.416911	0.602126	0.727536	0.664703	0.777412	0.602508	0.397492	0.222588	0.272464	0.335297	3.12	0.999338	1965.24	2114.54	791.84	605.44	1200.06
JAC	Standard Jaccard	JAC	-1			49	0.395301	0.385269	0.390251	0.751616	0.710209	0.992237	0.996055	0.29494	0.29494	0.543049	0.415957	0.70506	0.692634	0.751923	0.41461	0.602117	0.731269	0.664032	0.773192	0.612077	0.387923	0.226808	0.268731	0.335968	3.12	0.999338	1959.94	2103.06	772.8	616.92	1219.1
JAC	Standard Jaccard	JAC	65535		ü	97	0.392227	0.380013	0.38607	0.751569	0.712628	1.00423	1.00206	0.29654	0.29654	0.544518	0.416861	0.70346	0.690006	0.751989	0.416848	0.602057	0.727641	0.664586	0.777179	0.602834	0.397166	0.222821	0.272359	0.335414	3.12	0.999338	1964.2	2113.9	791.18	606.08	1200.72
JAC	Standard Jaccard	JAC	-1			27	0.395389	0.385524	0.390424	0.751564	0.710171	0.994024	0.996954	0.294889	0.294889	0.543002	0.416708	0.705111	0.692762	0.751864	0.414474	0.602048	0.731498	0.663891	0.772828	0.612696	0.387304	0.227172	0.268502	0.336109	3.12	0.999338	1963.48	2102.04	771.54	617.94	1220.36
JAC	Standard Jaccard	JAC	65535		ü	99	0.392298	0.380149	0.386174	0.751564	0.712556	1.00407	1.00198	0.296501	0.296501	0.544481	0.416882	0.703499	0.690074	0.751981	0.416788	0.602053	0.727736	0.664562	0.777061	0.603088	0.396912	0.222939	0.272264	0.335438	3.12	0.999338	1964.3	2113.58	790.68	606.4	1201.22
JAC	Standard Jaccard	JAC	65535		ü	96	0.392175	0.379949	0.386012	0.751553	0.712637	1.0044	1.00215	0.296565	0.296565	0.544541	0.416929	0.703435	0.689975	0.751974	0.416868	0.602038	0.727607	0.664568	0.777184	0.602765	0.397235	0.222816	0.272393	0.335432	3.12	0.999338	1964.52	2113.92	791.32	606.06	1200.58
JAC	Standard Jaccard	JAC	65535		ü	95	0.392138	0.379883	0.385961	0.751552	0.712569	1.00426	1.00207	0.296586	0.296586	0.54456	0.416946	0.703414	0.689942	0.751975	0.416896	0.602037	0.727561	0.664577	0.777236	0.602647	0.397353	0.222764	0.272439	0.335423	3.12	0.999338	1964.6	2114.06	791.56	605.92	1200.34
JAC	Standard Jaccard	JAC	-1			50	0.39525	0.385334	0.390259	0.751536	0.710307	0.992403	0.996141	0.294957	0.294957	0.543062	0.415893	0.705043	0.692667	0.751837	0.414546	0.602017	0.731372	0.663878	0.772904	0.61243	0.38757	0.227096	0.268628	0.336122	3.12	0.999338	1959.64	2102.28	772.1	617.7	1219.8
JAC	Standard Jaccard	JAC	-1			57	0.395452	0.38571	0.39055	0.751531	0.71032	0.992866	0.996377	0.294846	0.294846	0.542966	0.416029	0.705154	0.692855	0.751824	0.414379	0.602004	0.731651	0.663801	0.77258	0.61313	0.38687	0.22742	0.268349	0.336199	3.12	0.999338	1960.28	2101.38	770.68	618.6	1221.22
JAC	Standard Jaccard	JAC	65535		ü	98	0.392184	0.380014	0.38605	0.75153	0.712569	1.00404	1.00196	0.296557	0.296557	0.544532	0.416865	0.703443	0.690007	0.751948	0.416831	0.60201	0.727667	0.664518	0.777067	0.602947	0.397053	0.222933	0.272333	0.335482	3.12	0.999338	1964.22	2113.6	790.96	606.38	1200.94
JAC	Standard Jaccard	JAC	-1			26	0.39527	0.38543	0.390317	0.751495	0.710273	0.994898	0.997395	0.294944	0.294944	0.543051	0.416959	0.705056	0.692715	0.751793	0.414484	0.601962	0.731482	0.663788	0.772699	0.612731	0.387269	0.227301	0.268518	0.336212	3.12	0.999338	1964.66	2101.7	771.46	618.28	1220.44
JAC	Standard Jaccard	JAC	65535		ü	100	0.391994	0.379898	0.385897	0.751424	0.712769	1.00435	1.00212	0.296641	0.296641	0.544612	0.416674	0.703359	0.689949	0.751839	0.416832	0.601871	0.727667	0.664327	0.776841	0.603057	0.396943	0.223159	0.272333	0.335673	3.12	0.999338	1963.32	2112.98	790.74	607	1201.16
JAC	Standard Jaccard	JAC	-1			58	0.39517	0.385421	0.390264	0.751424	0.710528	0.993108	0.996499	0.294982	0.294982	0.543091	0.415817	0.705018	0.69271	0.751717	0.414457	0.601865	0.731527	0.663643	0.772492	0.612928	0.387072	0.227508	0.268473	0.336357	3.12	0.999338	1959.28	2101.14	771.08	618.84	1220.82
JAC	Standard Jaccard	JAC	-1			21	0.395182	0.385538	0.390329	0.751374	0.711975	0.997271	0.998581	0.294969	0.294969	0.543074	0.415634	0.705031	0.692769	0.751662	0.414378	0.601805	0.731653	0.663529	0.772246	0.613292	0.386708	0.227754	0.268347	0.336471	3.12	0.999338	1958.42	2100.46	770.34	619.52	1221.56
JAC	Standard Jaccard	JAC	-1			59	0.39487	0.385087	0.389946	0.751328	0.710566	0.99329	0.996589	0.295126	0.295126	0.543225	0.415855	0.704874	0.692543	0.751623	0.414558	0.601741	0.731365	0.663505	0.772471	0.612616	0.387384	0.227529	0.268635	0.336495	3.12	0.999338	1959.46	2101.08	771.7	618.9	1220.2
JAC	Standard Jaccard	JAC	-1			20	0.395127	0.385537	0.390301	0.751311	0.711636	0.997042	0.998471	0.294999	0.294999	0.543102	0.415999	0.705001	0.692768	0.751598	0.41435	0.601725	0.731698	0.66343	0.772071	0.613465	0.386535	0.227929	0.268302	0.33657	3.12	0.999338	1960.14	2099.98	770	620	1221.9
JAC	Standard Jaccard	JAC	65535		ü	10	0.385843	0.368978	0.377315	0.751272	0.725553	1.0405	1.02	0.299995	0.299995	0.547689	0.413487	0.700005	0.684489	0.751978	0.421275	0.60167	0.720384	0.665459	0.784987	0.583992	0.416008	0.215013	0.279616	0.334541	3.12	0.999338	1948.3	2135.14	828.7	584.84	1163.2
JAC	Standard Jaccard	JAC	-1			61	0.394907	0.385248	0.390046	0.751266	0.710587	0.993074	0.996481	0.295105	0.295105	0.543204	0.415774	0.704895	0.692624	0.751555	0.414463	0.601665	0.731515	0.663392	0.772173	0.613074	0.386926	0.227827	0.268485	0.336608	3.12	0.999338	1959.08	2100.28	770.8	619.7	1221.1
JAC	Standard Jaccard	JAC	-1			60	0.394673	0.384998	0.389804	0.751186	0.710562	0.992997	0.996441	0.29522	0.29522	0.543308	0.415749	0.70478	0.692499	0.751477	0.414532	0.601562	0.731401	0.663272	0.772134	0.612864	0.387136	0.227866	0.268599	0.336728	3.12	0.999338	1958.96	2100.16	771.22	619.82	1220.68
JAC	Standard Jaccard	JAC	-1			63	0.394446	0.384883	0.389633	0.751032	0.710731	0.993591	0.99674	0.295322	0.295322	0.543401	0.415745	0.704678	0.692441	0.751317	0.414512	0.601366	0.731435	0.663011	0.77177	0.613112	0.386888	0.22823	0.268565	0.336989	3.12	0.999338	1958.94	2099.18	770.72	620.8	1221.18
JAC	Standard Jaccard	JAC	-1			62	0.394462	0.384919	0.38966	0.751026	0.71057	0.99304	0.996464	0.295313	0.295313	0.543396	0.415779	0.704687	0.69246	0.75131	0.414495	0.601357	0.731463	0.662998	0.771726	0.613193	0.386807	0.228274	0.268537	0.337002	3.12	0.999338	1959.1	2099.06	770.56	620.92	1221.34
JAC	Standard Jaccard	JAC	-1			19	0.39416	0.384644	0.389371	0.750887	0.712667	0.998668	0.999279	0.295462	0.295462	0.543527	0.41518	0.704538	0.692322	0.751172	0.414546	0.601184	0.731375	0.662784	0.771539	0.613104	0.386896	0.228461	0.268625	0.337216	3.12	0.999338	1956.28	2098.54	770.74	621.44	1221.16
JAC	Standard Jaccard	JAC	-1			65	0.394049	0.384484	0.389236	0.750884	0.711088	0.994407	0.997151	0.295508	0.295508	0.543576	0.415596	0.704492	0.692242	0.75117	0.414619	0.601174	0.731265	0.662784	0.771645	0.612839	0.387161	0.228355	0.268735	0.337216	3.12	0.999338	1958.24	2098.84	771.26	621.14	1220.64
JAC	Standard Jaccard	JAC	-1			64	0.393986	0.384396	0.38916	0.750868	0.711007	0.994224	0.99706	0.295542	0.295542	0.543607	0.415609	0.704458	0.692198	0.751155	0.414651	0.601153	0.731215	0.662771	0.77167	0.612726	0.387274	0.22833	0.268785	0.337229	3.12	0.999338	1958.3	2098.9	771.48	621.08	1220.42
JAC	Standard Jaccard	JAC	-1			17	0.393587	0.383989	0.388757	0.750712	0.713193	1.00031	1.0001	0.295733	0.295733	0.543779	0.415095	0.704267	0.691994	0.750999	0.414754	0.600956	0.731046	0.662542	0.771528	0.612461	0.387539	0.228472	0.268954	0.337458	3.12	0.999338	1955.88	2098.52	772	621.46	1219.9
JAC	Standard Jaccard	JAC	-1			66	0.39357	0.384013	0.388761	0.750691	0.711372	0.994827	0.997361	0.295737	0.295737	0.543786	0.415384	0.704263	0.692006	0.750976	0.414736	0.600927	0.731076	0.662494	0.771447	0.612566	0.387434	0.228553	0.268924	0.337506	3.12	0.999338	1957.24	2098.3	771.8	621.68	1220.1
JAC	Standard Jaccard	JAC	65535		ü	9	0.384506	0.367856	0.376086	0.750683	0.727981	1.04661	1.02299	0.300606	0.300606	0.548249	0.41251	0.699394	0.683928	0.751381	0.421478	0.600911	0.72005	0.664456	0.784107	0.583748	0.416252	0.215893	0.27995	0.335544	3.12	0.999338	1943.7	2132.74	829.18	587.24	1162.72
JAC	Standard Jaccard	JAC	-1			69	0.393636	0.384137	0.388856	0.750683	0.711406	0.995022	0.997461	0.295704	0.295704	0.543755	0.415405	0.704296	0.692068	0.750965	0.41468	0.600917	0.731167	0.662469	0.771329	0.612808	0.387192	0.228671	0.268833	0.337531	3.12	0.999338	1957.34	2097.98	771.32	622	1220.58
JAC	Standard Jaccard	JAC	-1			67	0.393639	0.38416	0.388869	0.750677	0.7113	0.994958	0.997427	0.295699	0.295699	0.543751	0.415541	0.704301	0.69208	0.750959	0.414667	0.60091	0.731187	0.662451	0.771292	0.612868	0.387132	0.228708	0.268813	0.337549	3.12	0.999338	1957.98	2097.88	771.2	622.1	1220.7
JAC	Standard Jaccard	JAC	-1			70	0.393613	0.384148	0.38885	0.750659	0.711568	0.995294	0.997595	0.295712	0.295712	0.543763	0.415316	0.704288	0.692074	0.75094	0.414663	0.600886	0.731193	0.662419	0.771249	0.612899	0.387101	0.228751	0.268807	0.337581	3.12	0.999338	1956.92	2097.76	771.14	622.22	1220.76
JAC	Standard Jaccard	JAC	-1			68	0.393495	0.384029	0.388732	0.750612	0.711534	0.995294	0.997597	0.295767	0.295767	0.543813	0.415346	0.704233	0.692015	0.750893	0.414693	0.600827	0.731144	0.66235	0.771203	0.612826	0.387174	0.228797	0.268856	0.33765	3.12	0.999338	1957.06	2097.64	771.28	622.34	1220.62
JAC	Standard Jaccard	JAC	-1			71	0.393598	0.384202	0.38887	0.750612	0.711453	0.995451	0.997674	0.295716	0.295716	0.543762	0.415537	0.704284	0.692101	0.75089	0.414617	0.600831	0.731264	0.662334	0.771071	0.613131	0.386869	0.228929	0.268736	0.337666	3.12	0.999338	1957.96	2097.28	770.68	622.7	1221.22
JAC	Standard Jaccard	JAC	-1			18	0.393141	0.383584	0.388332	0.750517	0.713266	0.999945	0.999915	0.295946	0.295946	0.543973	0.414862	0.704054	0.691792	0.750804	0.414837	0.600708	0.730909	0.662232	0.771273	0.612312	0.387688	0.228727	0.269091	0.337768	3.12	0.999338	1954.78	2097.82	772.3	622.16	1219.6
JAC	Standard Jaccard	JAC	-1			72	0.393076	0.383744	0.388381	0.750374	0.711733	0.995968	0.997931	0.295962	0.295962	0.543989	0.415405	0.704038	0.691872	0.750649	0.414709	0.600525	0.731116	0.661961	0.770732	0.613012	0.386988	0.229268	0.268884	0.338039	3.12	0.999338	1957.34	2096.36	770.92	623.62	1220.98
JAC	Standard Jaccard	JAC	-1			16	0.392866	0.383427	0.388117	0.750338	0.713516	1.00127	1.00059	0.296069	0.296069	0.544087	0.415151	0.703931	0.691713	0.750618	0.414828	0.600482	0.730919	0.661947	0.770877	0.61255	0.38745	0.229123	0.269081	0.338053	3.12	0.999338	1956.14	2096.78	771.84	623.2	1220.06
JAC	Standard Jaccard	JAC	-1			73	0.392917	0.383547	0.388203	0.750334	0.711903	0.996325	0.998108	0.296039	0.296039	0.544061	0.415295	0.703961	0.691774	0.750611	0.414777	0.600473	0.731006	0.66191	0.770768	0.61278	0.38722	0.229232	0.268994	0.33809	3.12	0.999338	1956.82	2096.46	771.38	623.52	1220.52
JAC	Standard Jaccard	JAC	-1			74	0.392759	0.383441	0.388071	0.750246	0.711962	0.996622	0.998258	0.296111	0.296111	0.544127	0.415337	0.703889	0.69172	0.750521	0.414782	0.600361	0.730998	0.661761	0.770592	0.612849	0.387151	0.229408	0.269002	0.338239	3.12	0.999338	1957.02	2095.98	771.24	624	1220.66
JAC	Standard Jaccard	JAC	-1			75	0.392447	0.383141	0.387765	0.75012	0.7122	0.996885	0.998389	0.29626	0.29626	0.544263	0.415142	0.70374	0.69157	0.750395	0.414854	0.6002	0.730879	0.661568	0.770459	0.612681	0.387319	0.229541	0.269121	0.338432	3.12	0.999338	1956.1	2095.62	771.58	624.36	1220.32
JAC	Standard Jaccard	JAC	-1			76	0.392378	0.383096	0.387708	0.750072	0.712268	0.996817	0.998356	0.296294	0.296294	0.544295	0.414998	0.703706	0.691548	0.750345	0.414855	0.600138	0.730881	0.661498	0.770357	0.61274	0.38726	0.229643	0.269119	0.338502	3.12	0.999338	1955.42	2095.34	771.46	624.64	1220.44
JAC	Standard Jaccard	JAC	-1			77	0.391995	0.382823	0.38738	0.749861	0.712455	0.997064	0.998479	0.296472	0.296472	0.544457	0.414832	0.703528	0.691411	0.750129	0.414877	0.599869	0.730844	0.661151	0.769951	0.612871	0.387129	0.230049	0.269156	0.338849	3.12	0.999338	1954.64	2094.24	771.2	625.74	1220.7
JAC	Standard Jaccard	JAC	-1			78	0.391914	0.382752	0.387305	0.749826	0.712642	0.997335	0.998613	0.29651	0.29651	0.544494	0.414654	0.70349	0.691376	0.750094	0.41489	0.599821	0.730823	0.661091	0.769902	0.612851	0.387149	0.230098	0.269177	0.338909	3.12	0.999338	1953.8	2094.1	771.24	625.88	1220.66
JAC	Standard Jaccard	JAC	-1			81	0.391863	0.382815	0.387311	0.749745	0.712595	0.997407	0.998653	0.296527	0.296527	0.54451	0.41476	0.703473	0.691408	0.750008	0.414827	0.599718	0.730926	0.660936	0.769614	0.613201	0.386799	0.230386	0.269074	0.339064	3.12	0.999338	1954.3	2093.32	770.54	626.66	1221.36
JAC	Standard Jaccard	JAC	-1			80	0.391836	0.382794	0.387288	0.749733	0.712586	0.997153	0.998525	0.29654	0.29654	0.544522	0.414654	0.70346	0.691397	0.749995	0.414831	0.599703	0.730918	0.660919	0.769598	0.613196	0.386804	0.230402	0.269082	0.339081	3.12	0.999338	1953.8	2093.28	770.56	626.7	1221.34
JAC	Standard Jaccard	JAC	-1			79	0.391706	0.382587	0.387118	0.74972	0.712752	0.997327	0.998612	0.296608	0.296608	0.544583	0.414493	0.703392	0.691293	0.749987	0.414915	0.599687	0.730782	0.660924	0.769724	0.612862	0.387138	0.230276	0.269218	0.339076	3.12	0.999338	1953.04	2093.62	771.22	626.36	1220.68
JAC	Standard Jaccard	JAC	-1			82	0.391682	0.382649	0.387138	0.749669	0.71271	0.997166	0.99853	0.296612	0.296612	0.544586	0.414488	0.703388	0.691324	0.749931	0.414863	0.599622	0.730867	0.660815	0.76952	0.613129	0.386871	0.23048	0.269133	0.339185	3.12	0.999338	1953.02	2093.06	770.68	626.92	1221.22
JAC	Standard Jaccard	JAC	-1			85	0.391719	0.382776	0.38722	0.749629	0.712837	0.997216	0.998555	0.296591	0.296591	0.544568	0.414348	0.703409	0.691388	0.749887	0.414788	0.599569	0.730991	0.660728	0.7693	0.613476	0.386524	0.2307	0.269009	0.339272	3.12	0.999338	1952.36	2092.46	769.98	627.52	1221.92
JAC	Standard Jaccard	JAC	-1			84	0.391384	0.38237	0.38685	0.749547	0.71293	0.997539	0.998717	0.296752	0.296752	0.544715	0.414352	0.703248	0.691185	0.749808	0.414926	0.599464	0.730765	0.660619	0.769374	0.612996	0.387004	0.230626	0.269235	0.339381	3.12	0.999338	1952.38	2092.66	770.94	627.32	1220.96
JAC	Standard Jaccard	JAC	-1			83	0.391359	0.382342	0.386823	0.749536	0.712841	0.997611	0.998752	0.296765	0.296765	0.544726	0.41448	0.703235	0.691171	0.749797	0.414935	0.599451	0.730751	0.660607	0.769366	0.612976	0.387024	0.230634	0.269249	0.339393	3.12	0.999338	1952.98	2092.64	770.98	627.34	1220.92
JAC	Standard Jaccard	JAC	-1			15	0.390871	0.381502	0.386156	0.749528	0.714734	1.00372	1.00182	0.297019	0.297019	0.544963	0.414425	0.702981	0.690751	0.749807	0.415295	0.59944	0.730166	0.660704	0.770008	0.611494	0.388506	0.229992	0.269834	0.339296	3.12	0.999338	1952.72	2094.4	773.94	625.58	1217.96
JAC	Standard Jaccard	JAC	-1			86	0.39134	0.382337	0.386811	0.749519	0.71307	0.99773	0.99881	0.296773	0.296773	0.544735	0.414208	0.703227	0.691169	0.749779	0.414929	0.599429	0.73076	0.66058	0.76932	0.613017	0.386983	0.23068	0.26924	0.33942	3.12	0.999338	1951.7	2092.52	770.9	627.46	1221
JAC	Standard Jaccard	JAC	-1			87	0.391279	0.382292	0.386758	0.749483	0.713083	0.997853	0.998874	0.296803	0.296803	0.544761	0.414246	0.703197	0.691146	0.749743	0.414932	0.599384	0.730754	0.660525	0.769253	0.613039	0.386961	0.230747	0.269246	0.339475	3.12	0.999338	1951.88	2092.34	770.86	627.64	1221.04
JAC	Standard Jaccard	JAC	-1			89	0.391025	0.382137	0.386554	0.749326	0.713142	0.997726	0.99881	0.296922	0.296922	0.544871	0.414102	0.703078	0.691068	0.749583	0.414928	0.599183	0.730761	0.660264	0.768918	0.613219	0.386781	0.231082	0.269239	0.339736	3.12	0.999338	1951.2	2091.42	770.5	628.56	1221.4
JAC	Standard Jaccard	JAC	-1			88	0.390951	0.38203	0.386464	0.749322	0.713172	0.99807	0.998983	0.296956	0.296956	0.544903	0.414229	0.703044	0.691015	0.749579	0.414972	0.599176	0.73069	0.660261	0.768983	0.613047	0.386953	0.231017	0.26931	0.339739	3.12	0.999338	1951.8	2091.6	770.84	628.38	1221.06
JAC	Standard Jaccard	JAC	-1			90	0.390874	0.382033	0.386427	0.749246	0.713291	0.998324	0.999109	0.29699	0.29699	0.544934	0.414089	0.70301	0.691016	0.7495	0.414937	0.59908	0.730746	0.660128	0.768762	0.61327	0.38673	0.231238	0.269254	0.339872	3.12	0.999338	1951.14	2091	770.4	628.98	1221.5
JAC	Standard Jaccard	JAC	65535		ü	0	0.38922	0.379323	0.384239	0.749213	0.716156	1.00848	1.00419	0.297822	0.297822	0.545695	0.413818	0.702178	0.689662	0.749518	0.416092	0.599037	0.728875	0.660345	0.770771	0.608552	0.391448	0.229229	0.271125	0.339655	3.12	0.999338	1949.86	2096.46	779.78	623.52	1212.12
JAC	Standard Jaccard	JAC	-1			91	0.390755	0.381943	0.386323	0.749184	0.71352	0.998613	0.999254	0.297045	0.297045	0.544983	0.413877	0.702955	0.690971	0.749437	0.414947	0.599002	0.730729	0.660027	0.768652	0.613291	0.386709	0.231348	0.269271	0.339973	3.12	0.999338	1950.14	2090.7	770.36	629.28	1221.54
JAC	Standard Jaccard	JAC	-1			93	0.390675	0.381909	0.386266	0.749125	0.713622	0.998706	0.9993	0.297079	0.297079	0.545016	0.41372	0.702921	0.690955	0.749375	0.414935	0.598926	0.73075	0.659925	0.768501	0.613408	0.386592	0.231499	0.26925	0.340075	3.12	0.999338	1949.4	2090.3	770.12	629.68	1221.78
JAC	Standard Jaccard	JAC	-1			96	0.390653	0.38194	0.386271	0.74909	0.71372	0.998872	0.999381	0.297087	0.297087	0.545022	0.413699	0.702913	0.69097	0.749338	0.414904	0.598881	0.7308	0.659853	0.768371	0.613569	0.386431	0.231629	0.2692	0.340147	3.12	0.999338	1949.3	2089.94	769.8	630.04	1222.1
JAC	Standard Jaccard	JAC	-1			92	0.390623	0.381884	0.386227	0.749088	0.713626	0.998422	0.999158	0.297104	0.297104	0.545037	0.413656	0.702896	0.690942	0.749337	0.41493	0.59888	0.730758	0.659865	0.768415	0.613468	0.386532	0.231585	0.269242	0.340135	3.12	0.999338	1949.1	2090.06	770	629.92	1221.9
JAC	Standard Jaccard	JAC	-1			95	0.390567	0.381839	0.386177	0.749063	0.713754	0.998931	0.999412	0.29713	0.29713	0.545061	0.413686	0.70287	0.690919	0.749312	0.414936	0.598847	0.730745	0.659821	0.768377	0.613462	0.386538	0.231623	0.269255	0.340179	3.12	0.999338	1949.24	2089.96	770.02	630.02	1221.88
JAC	Standard Jaccard	JAC	-1			94	0.390452	0.381724	0.386063	0.749017	0.713724	0.998859	0.999376	0.297185	0.297185	0.545112	0.413661	0.702815	0.690862	0.749266	0.414966	0.598789	0.730697	0.659755	0.768333	0.613392	0.386608	0.231667	0.269303	0.340245	3.12	0.999338	1949.12	2089.84	770.16	630.14	1221.74
JAC	Standard Jaccard	JAC	-1			97	0.390576	0.381942	0.386234	0.74901	0.713966	0.99922	0.999555	0.297121	0.297121	0.545052	0.41347	0.702879	0.690971	0.749254	0.414869	0.598781	0.730856	0.65972	0.768141	0.613801	0.386199	0.231859	0.269144	0.34028	3.12	0.999338	1948.22	2089.32	769.34	630.66	1222.56
JAC	Standard Jaccard	JAC	-1			99	0.390597	0.382026	0.386287	0.748981	0.713979	0.999266	0.99958	0.297108	0.297108	0.545042	0.413533	0.702892	0.691013	0.749223	0.414819	0.598743	0.730939	0.659658	0.767988	0.614038	0.385962	0.232012	0.269061	0.340342	3.12	0.999338	1948.52	2088.9	768.86	631.08	1223.04
JAC	Standard Jaccard	JAC	-1			98	0.390467	0.381848	0.386132	0.748958	0.714123	0.99964	0.999766	0.297172	0.297172	0.5451	0.413478	0.702828	0.690924	0.749201	0.414887	0.598714	0.730829	0.659638	0.76806	0.613788	0.386212	0.23194	0.269171	0.340362	3.12	0.999338	1948.26	2089.1	769.36	630.88	1222.54
JAC	Standard Jaccard	JAC	-1			100	0.390479	0.381951	0.38619	0.74891	0.714063	0.999462	0.999677	0.297164	0.297164	0.545092	0.413525	0.702836	0.690976	0.74915	0.414818	0.598652	0.730939	0.65954	0.76784	0.614111	0.385889	0.23216	0.269061	0.34046	3.12	0.999338	1948.48	2088.5	768.72	631.48	1223.18
JAC	Standard Jaccard	JAC	-1			14	0.389134	0.379883	0.384479	0.748781	0.715634	1.00596	1.00293	0.297847	0.297847	0.545722	0.414064	0.702153	0.689941	0.749058	0.415662	0.598486	0.72957	0.659564	0.769098	0.610785	0.389215	0.230902	0.27043	0.340436	3.12	0.999338	1951.02	2091.92	775.36	628.06	1216.54
JAC	Standard Jaccard	JAC	65535		ü	8	0.379777	0.36358	0.371588	0.748753	0.732527	1.05711	1.0281	0.302783	0.302783	0.550229	0.410418	0.697217	0.68179	0.749432	0.422397	0.598442	0.718529	0.661248	0.781696	0.581884	0.418116	0.218304	0.281471	0.338752	3.12	0.999338	1933.84	2126.18	832.88	593.8	1159.02
JAC	Standard Jaccard	JAC	-1			13	0.386901	0.378007	0.382426	0.747692	0.717523	1.00958	1.00473	0.2989	0.2989	0.546683	0.412926	0.7011	0.689004	0.747953	0.415982	0.5971	0.729049	0.657852	0.767379	0.610628	0.389372	0.232621	0.270951	0.342148	3.12	0.999338	1945.66	2087.26	775.66	632.72	1216.24
JAC	Standard Jaccard	JAC	-1			12	0.385272	0.376707	0.380964	0.746866	0.719114	1.01278	1.00632	0.299659	0.299659	0.547373	0.412078	0.700341	0.688354	0.747112	0.416171	0.596053	0.728739	0.656533	0.765975	0.610732	0.389268	0.234025	0.271261	0.343467	3.12	0.999338	1941.66	2083.46	775.44	636.52	1216.46
JAC	Standard Jaccard	JAC	65535		ü	7	0.374664	0.358923	0.366707	0.746665	0.737604	1.07078	1.03473	0.305148	0.305148	0.552373	0.408741	0.694852	0.679462	0.747328	0.423404	0.59578	0.716855	0.657809	0.779126	0.579797	0.420203	0.220874	0.283145	0.342191	3.12	0.999338	1925.94	2119.2	837.04	600.78	1154.86
JAC	Standard Jaccard	JAC	-1			11	0.38235	0.374144	0.378223	0.745497	0.72113	1.01757	1.0087	0.301056	0.301056	0.548642	0.411297	0.698944	0.687072	0.74573	0.416668	0.594315	0.727925	0.654425	0.764003	0.610142	0.389858	0.235997	0.272075	0.345575	3.12	0.999338	1937.98	2078.08	776.64	641.9	1215.26
JAC	Standard Jaccard	JAC	-1			0	0.385037	0.378541	0.381774	0.745494	0.719887	1.00871	1.0043	0.299727	0.299727	0.547442	0.409157	0.700273	0.68927	0.745652	0.41475	0.594294	0.731054	0.653983	0.760566	0.617975	0.382025	0.239434	0.268946	0.346017	3.12	0.999338	1927.9	2068.7	761	651.28	1230.9
JAC	Standard Jaccard	JAC	65535		ü	6	0.369773	0.354625	0.362118	0.744581	0.743542	1.08607	1.04209	0.307397	0.307397	0.554403	0.406462	0.692603	0.677313	0.745216	0.424277	0.593135	0.715402	0.654371	0.776299	0.578327	0.421673	0.223701	0.284598	0.345629	3.12	0.999338	1915.2	2111.52	839.96	608.46	1151.94
JAC	Standard Jaccard	JAC	-1			10	0.379826	0.37189	0.375836	0.74436	0.724585	1.02536	1.01255	0.302249	0.302249	0.549733	0.409616	0.697751	0.685945	0.744583	0.41713	0.592868	0.727167	0.652658	0.762444	0.609446	0.390554	0.237556	0.272833	0.347342	3.12	0.999338	1930.06	2073.86	778.04	646.12	1213.86
JAC	Standard Jaccard	JAC	-1			9	0.378056	0.370437	0.374226	0.743461	0.72591	1.03028	1.01497	0.303098	0.303098	0.550508	0.409764	0.696902	0.685219	0.743674	0.417359	0.591724	0.726793	0.651263	0.760979	0.609458	0.390542	0.239021	0.273207	0.348737	3.12	0.999338	1930.76	2069.86	778.04	650.12	1213.86
JAC	Standard Jaccard	JAC	-1			8	0.374578	0.367391	0.370966	0.741799	0.730494	1.04008	1.01978	0.304757	0.304757	0.552011	0.407298	0.695243	0.683696	0.741994	0.417936	0.589625	0.725845	0.648733	0.758534	0.608857	0.391143	0.241466	0.274155	0.351267	3.12	0.999338	1919.14	2063.24	779.24	656.74	1212.66
JAC	Standard Jaccard	JAC	65535		ü	5	0.359852	0.345668	0.352686	0.740417	0.752897	1.11	1.05351	0.312011	0.312011	0.558546	0.403262	0.687989	0.672834	0.741014	0.426164	0.587872	0.712245	0.647606	0.770979	0.574689	0.425311	0.229021	0.287755	0.352394	3.12	0.999338	1900.12	2097.04	847.22	622.94	1144.68
JAC	Standard Jaccard	JAC	-1			7	0.368637	0.362261	0.365434	0.738898	0.735244	1.05139	1.02532	0.307605	0.307605	0.554591	0.405324	0.692395	0.68113	0.739064	0.418875	0.585961	0.724315	0.644322	0.754143	0.608118	0.391882	0.245857	0.275685	0.355678	3.12	0.999338	1909.84	2051.28	780.7	668.7	1211.2
JAC	Standard Jaccard	JAC	-1			6	0.363822	0.358191	0.360995	0.736423	0.741891	1.06827	1.03352	0.309936	0.309936	0.556686	0.402977	0.690064	0.679096	0.736561	0.419556	0.582859	0.723193	0.64063	0.750206	0.607985	0.392015	0.249794	0.276807	0.35937	3.12	0.999338	1898.78	2040.58	780.98	679.4	1210.92
JAC	Standard Jaccard	JAC	-1			5	0.359516	0.354768	0.357133	0.733973	0.749981	1.08856	1.04329	0.312058	0.312058	0.558588	0.399526	0.687942	0.677384	0.734083	0.419981	0.579794	0.722498	0.637019	0.745891	0.608877	0.391123	0.254109	0.277502	0.362981	3.12	0.999338	1882.52	2028.8	779.2	691.18	1212.7
JAC	Standard Jaccard	JAC	65535		ü	4	0.343677	0.331544	0.337554	0.733265	0.769298	1.15118	1.07286	0.319528	0.319528	0.565237	0.396547	0.680472	0.665772	0.733765	0.428938	0.578905	0.707578	0.636099	0.760953	0.570591	0.429409	0.239047	0.292422	0.363901	3.12	0.999338	1868.48	2069.78	855.38	650.2	1136.52
JAC	Standard Jaccard	JAC	-1			4	0.348759	0.344921	0.346833	0.728854	0.7642	1.12573	1.06095	0.317304	0.317304	0.563269	0.394458	0.682696	0.672461	0.72894	0.422012	0.573426	0.719148	0.62961	0.738905	0.606016	0.393984	0.261095	0.280852	0.37039	3.12	0.999338	1858.64	2009.78	784.9	710.2	1207
JAC	Standard Jaccard	JAC	65535		ü	3	0.327515	0.31669	0.322055	0.726383	0.792677	1.21259	1.10112	0.327143	0.327143	0.571939	0.388037	0.672857	0.658345	0.726833	0.432107	0.570366	0.702207	0.625308	0.75236	0.564331	0.435669	0.24764	0.297793	0.374692	3.12	0.999338	1828.38	2046.38	867.86	673.6	1124.04
JAC	Standard Jaccard	JAC	-1			3	0.327851	0.324578	0.326209	0.719874	0.788174	1.18593	1.08894	0.32744	0.32744	0.572193	0.384755	0.67256	0.662289	0.719949	0.426854	0.562392	0.711074	0.616777	0.728972	0.595606	0.404394	0.271028	0.288926	0.383223	3.12	0.999338	1812.92	1982.76	805.64	737.22	1186.26
JAC	Standard Jaccard	JAC	65535		ü	2	0.303385	0.295096	0.29921	0.715349	0.832093	1.32544	1.15124	0.338604	0.338604	0.581878	0.376003	0.661396	0.647548	0.715676	0.436412	0.556875	0.69484	0.608545	0.737167	0.557929	0.442071	0.262833	0.30516	0.391455	3.12	0.999338	1771.68	2005.08	880.56	714.9	1111.34
JAC	Standard Jaccard	JAC	-1			2	0.301027	0.299128	0.300075	0.707298	0.83034	1.30197	1.14097	0.340629	0.340629	0.583606	0.370353	0.659371	0.649564	0.707337	0.432424	0.547195	0.701663	0.599364	0.71309	0.586038	0.413962	0.28691	0.298337	0.400636	3.12	0.999338	1745.06	1939.6	824.62	780.38	1167.28
JAC	Standard Jaccard	JAC	65535		ü	1	0.253492	0.247642	0.250549	0.694078	0.935868	1.63364	1.27808	0.362492	0.362492	0.602053	0.34447	0.637508	0.623821	0.694325	0.446791	0.531513	0.676707	0.576785	0.712439	0.535202	0.464798	0.287561	0.323293	0.423215	3.12	0.999338	1623.1	1937.78	925.82	782.2	1066.08
JAC	Standard Jaccard	JAC	-1			1	0.248584	0.247568	0.248074	0.684356	0.935822	1.62152	1.27332	0.366308	0.366308	0.605212	0.341261	0.633692	0.623784	0.68439	0.444462	0.520209	0.680807	0.567777	0.68804	0.559528	0.440472	0.31196	0.319193	0.432223	3.12	0.999338	1607.98	1871.42	877.44	848.56	1114.46
PCC	Standard Pearson without IOI	PCCnIOI	65535	ü	ü	100	0.381293	0.369784	0.375493	0.747059	0.737298	1.1006	1.04903	0.30168	0.30168	0.549221	0.41479	0.69832	0.684892	0.747458	0.419171	0.596284	0.723847	0.657447	0.771868	0.597917	0.402083	0.228132	0.276153	0.342553	3.12	0.999338	1954.44	2099.44	800.94	620.54	1190.96
MRC	Median-Based Robust without IOI	MRCnIOI	65535	ü	ü	25	0.382087	0.371097	0.37655	0.747057	0.731812	1.07199	1.03529	0.301275	0.301275	0.548858	0.413779	0.698725	0.685548	0.747426	0.418629	0.596278	0.724744	0.657343	0.770845	0.600252	0.399748	0.229155	0.275256	0.342657	3.16	0.99933	1949.66	2096.66	796.26	623.3	1195.62
COS	Cosine without IOI	COSnIOI	65535	ü	ü	76	0.37653	0.361428	0.368901	0.747049	0.727786	1.0438	1.02161	0.304214	0.304214	0.551521	0.411212	0.695786	0.680714	0.747665	0.422576	0.596278	0.718226	0.658304	0.778339	0.58309	0.41691	0.221661	0.281774	0.341696	3.12	0.999338	1937.58	2117.06	830.5	602.92	1161.4
MRC	Median-Based Robust without IOI	MRCnIOI	65535	ü	ü	24	0.381857	0.370752	0.376262	0.747032	0.731765	1.07154	1.03508	0.30139	0.30139	0.548963	0.413788	0.69861	0.685376	0.747407	0.418764	0.596246	0.724527	0.65733	0.771036	0.599716	0.400284	0.228964	0.275473	0.34267	3.16	0.99933	1949.7	2097.18	797.32	622.78	1194.56
COS	Cosine without IOI	COSnIOI	65535	ü	ü	8	0.362914	0.335304	0.348834	0.747022	0.75428	1.12094	1.05868	0.312139	0.312139	0.558665	0.404565	0.687861	0.667652	0.748587	0.432316	0.596231	0.701858	0.661055	0.798453	0.536851	0.463149	0.201547	0.298142	0.338945	3.12	0.999338	1906.26	2171.76	922.54	548.22	1069.36
COS	Cosine without IOI	COSnIOI	65535	ü	ü	77	0.376556	0.361557	0.368979	0.74701	0.727794	1.04383	1.02163	0.304193	0.304193	0.551503	0.41122	0.695807	0.680778	0.74762	0.42251	0.596228	0.718337	0.658219	0.778126	0.583431	0.416569	0.221874	0.281663	0.341781	3.12	0.999338	1937.62	2116.48	829.82	603.5	1162.08
MRC	Median-Based Robust without IOI	MRCnIOI	65535	ü	ü	20	0.38111	0.369617	0.375318	0.746982	0.731795	1.06948	1.03409	0.301759	0.301759	0.549302	0.413465	0.698241	0.684808	0.747379	0.419213	0.596179	0.723788	0.657322	0.771762	0.597854	0.402146	0.228238	0.276212	0.342678	3.16	0.99933	1948.18	2099.16	801.04	620.8	1190.84
MRC	Median-Based Robust without IOI	MRCnIOI	65535	ü	ü	19	0.381028	0.369493	0.375215	0.746965	0.732427	1.07055	1.0346	0.301801	0.301801	0.549336	0.413143	0.698199	0.684747	0.747363	0.419257	0.596163	0.723712	0.657316	0.771811	0.597682	0.402318	0.228189	0.276288	0.342684	3.16	0.99933	1946.66	2099.3	801.38	620.66	1190.5
MRC	Median-Based Robust without IOI	MRCnIOI	65535	ü	ü	30	0.382348	0.371751	0.37701	0.746934	0.733119	1.07667	1.03755	0.301131	0.301131	0.548726	0.413533	0.698869	0.685875	0.747282	0.418304	0.596123	0.72528	0.657068	0.769979	0.601772	0.398228	0.230021	0.27472	0.342932	3.16	0.99933	1948.5	2094.3	793.22	625.66	1198.66
MRC	Median-Based Robust without IOI	MRCnIOI	65535	ü	ü	21	0.381295	0.370043	0.375626	0.746918	0.731527	1.06987	1.03428	0.301657	0.301657	0.549209	0.413928	0.698343	0.685022	0.747301	0.419004	0.596098	0.72413	0.657165	0.77124	0.598804	0.401196	0.22876	0.27587	0.342835	3.16	0.99933	1950.36	2097.74	799.14	622.22	1192.74
JAC	Jaccard without IOI	JACnIOI	65535	ü	ü	54	0.377456	0.363376	0.370348	0.746915	0.725617	1.03852	1.01903	0.303688	0.303688	0.55105	0.412319	0.696312	0.681688	0.747467	0.421744	0.596101	0.719606	0.65785	0.776434	0.586942	0.413058	0.223566	0.280394	0.34215	3.12	0.999338	1942.8	2111.88	822.84	608.1	1169.06
JAC	Jaccard without IOI	JACnIOI	65535	ü	ü	14	0.37392	0.356965	0.365342	0.746912	0.73347	1.05939	1.02921	0.305627	0.305627	0.552806	0.409832	0.694373	0.678483	0.747654	0.424283	0.596099	0.715395	0.658525	0.781399	0.575567	0.424433	0.218601	0.284605	0.341475	3.12	0.999338	1931.08	2125.38	845.48	594.6	1146.42
JAC	Jaccard without IOI	JACnIOI	65535	ü	ü	55	0.377456	0.363432	0.370376	0.746886	0.72557	1.03844	1.01899	0.303683	0.303683	0.551046	0.412392	0.696317	0.681716	0.747435	0.42171	0.596065	0.719661	0.657794	0.776308	0.587124	0.412876	0.223692	0.280339	0.342206	3.12	0.999338	1943.14	2111.54	822.48	608.44	1169.42
MRC	Median-Based Robust without IOI	MRCnIOI	65535	ü	ü	23	0.381261	0.370061	0.375617	0.746872	0.73146	1.07043	1.03454	0.301674	0.301674	0.549224	0.413987	0.698326	0.68503	0.747253	0.418981	0.596039	0.72417	0.65709	0.771098	0.598963	0.401037	0.228902	0.27583	0.34291	3.16	0.99933	1950.64	2097.34	798.82	622.62	1193.06
COS	Cosine without IOI	COSnIOI	65535	ü	ü	79	0.376331	0.36147	0.368824	0.746869	0.727816	1.04391	1.02166	0.304286	0.304286	0.551587	0.411254	0.695714	0.680735	0.747472	0.422485	0.596046	0.718375	0.657956	0.777774	0.583696	0.416304	0.222226	0.281625	0.342044	3.12	0.999338	1937.78	2115.52	829.3	604.46	1162.6
MRC	Median-Based Robust without IOI	MRCnIOI	65535	ü	ü	17	0.380498	0.368813	0.374609	0.746836	0.733289	1.07067	1.03467	0.302065	0.302065	0.549576	0.4122	0.697935	0.684407	0.747243	0.419486	0.595998	0.72334	0.657158	0.77196	0.596853	0.403147	0.22804	0.27666	0.342842	3.16	0.99933	1942.22	2099.7	803.02	620.26	1188.86
COS	Cosine without IOI	COSnIOI	65535	ü	ü	78	0.376208	0.361328	0.368692	0.746831	0.728083	1.04444	1.02192	0.304346	0.304346	0.551642	0.411084	0.695654	0.680664	0.747435	0.422528	0.595998	0.718305	0.657903	0.777774	0.583554	0.416446	0.222226	0.281695	0.342097	3.12	0.999338	1936.98	2115.52	829.58	604.46	1162.32
JAC	Jaccard without IOI	JACnIOI	65535	ü	ü	13	0.373423	0.356331	0.364775	0.746791	0.733991	1.06117	1.03008	0.305873	0.305873	0.553033	0.409777	0.694127	0.678165	0.747544	0.424483	0.595941	0.715068	0.658355	0.781525	0.574805	0.425195	0.218475	0.284932	0.341645	3.12	0.999338	1930.82	2125.72	846.98	594.26	1144.92
COS	Cosine without IOI	COSnIOI	65535	ü	ü	80	0.376179	0.361378	0.368703	0.746785	0.727973	1.04415	1.02178	0.304354	0.304354	0.55165	0.411156	0.695646	0.680689	0.747385	0.422488	0.595938	0.718371	0.657809	0.7776	0.583778	0.416222	0.2224	0.281629	0.342191	3.12	0.999338	1937.32	2115.04	829.14	604.94	1162.76
MRC	Median-Based Robust without IOI	MRCnIOI	65535	ü	ü	22	0.381019	0.369825	0.375379	0.746775	0.731519	1.06997	1.03433	0.301784	0.301784	0.549326	0.413855	0.698216	0.684912	0.747154	0.419038	0.595914	0.72408	0.65694	0.770989	0.598836	0.401164	0.229011	0.27592	0.34306	3.16	0.99933	1950.02	2097.06	799.06	622.9	1192.82
MRC	Median-Based Robust without IOI	MRCnIOI	65535	ü	ü	18	0.380636	0.369173	0.374859	0.746772	0.732822	1.0708	1.03473	0.301984	0.301984	0.549505	0.41279	0.698016	0.684586	0.747167	0.419312	0.595915	0.723628	0.657008	0.771495	0.597678	0.402322	0.228505	0.276372	0.342992	3.16	0.99933	1945	2098.44	801.38	621.52	1190.5
MRC	Median-Based Robust without IOI	MRCnIOI	65535	ü	ü	29	0.381794	0.371152	0.376434	0.74675	0.732996	1.07577	1.03711	0.301398	0.301398	0.548969	0.413478	0.698602	0.685576	0.747101	0.418475	0.595888	0.724998	0.656796	0.769907	0.601244	0.398756	0.230093	0.275002	0.343204	3.16	0.99933	1948.24	2094.1	794.28	625.86	1197.6
COS	Cosine without IOI	COSnIOI	65535	ü	ü	81	0.376149	0.361402	0.3687	0.746749	0.727905	1.04383	1.02162	0.304362	0.304362	0.551656	0.411114	0.695638	0.680701	0.747345	0.422464	0.595894	0.71841	0.657739	0.777474	0.583928	0.416072	0.222526	0.28159	0.342261	3.12	0.999338	1937.12	2114.7	828.84	605.28	1163.06
COS	Cosine without IOI	COSnIOI	65535	ü	ü	82	0.375901	0.361194	0.368473	0.746634	0.728138	1.04423	1.02182	0.304477	0.304477	0.55176	0.410978	0.695523	0.680597	0.747228	0.422502	0.595747	0.718349	0.657553	0.777297	0.583896	0.416104	0.222703	0.281651	0.342447	3.12	0.999338	1936.48	2114.22	828.9	605.76	1163
COS	Cosine without IOI	COSnIOI	65535	ü	ü	86	0.376122	0.361628	0.368802	0.746614	0.7279	1.04362	1.02152	0.304354	0.304354	0.551648	0.411046	0.695646	0.680814	0.747195	0.422322	0.595723	0.718646	0.657477	0.776905	0.584722	0.415278	0.223095	0.281354	0.342523	3.12	0.999338	1936.8	2113.16	827.26	606.82	1164.64
COS	Cosine without IOI	COSnIOI	65535	ü	ü	85	0.376055	0.361537	0.368723	0.746601	0.72796	1.04378	1.0216	0.304388	0.304388	0.55168	0.411029	0.695612	0.680769	0.747183	0.422353	0.595706	0.718594	0.657461	0.776936	0.584601	0.415399	0.223064	0.281406	0.342539	3.12	0.999338	1936.72	2113.24	827.5	606.74	1164.4
COS	Cosine without IOI	COSnIOI	65535	ü	ü	83	0.375817	0.361161	0.368415	0.74658	0.727973	1.04389	1.02165	0.304511	0.304511	0.551789	0.411063	0.695489	0.68058	0.747171	0.422493	0.59568	0.718361	0.657456	0.777163	0.583998	0.416002	0.222837	0.281639	0.342544	3.12	0.999338	1936.88	2113.86	828.7	606.12	1163.2
JAC	Jaccard without IOI	JACnIOI	65535	ü	ü	59	0.377013	0.363305	0.370094	0.746566	0.725914	1.03823	1.01888	0.303866	0.303866	0.55121	0.411835	0.696134	0.681653	0.747097	0.42163	0.595659	0.719794	0.657219	0.775462	0.587843	0.412157	0.224538	0.280206	0.342781	3.12	0.999338	1940.52	2109.24	821.04	610.74	1170.86
MRC	Median-Based Robust without IOI	MRCnIOI	65535	ü	ü	31	0.381484	0.370991	0.376199	0.746549	0.733955	1.07823	1.0383	0.301534	0.301534	0.549093	0.412989	0.698466	0.685495	0.746892	0.418456	0.595632	0.72503	0.656454	0.769439	0.601551	0.398449	0.230561	0.27497	0.343546	3.16	0.99933	1945.94	2092.84	793.66	627.12	1198.22
JAC	Jaccard without IOI	JACnIOI	65535	ü	ü	58	0.376944	0.363237	0.370026	0.746538	0.725965	1.03844	1.01898	0.3039	0.3039	0.55124	0.411852	0.6961	0.681619	0.747069	0.421645	0.595623	0.719768	0.657176	0.775433	0.587804	0.412196	0.224567	0.280232	0.342824	3.12	0.999338	1940.6	2109.16	821.12	610.82	1170.78
JAC	Jaccard without IOI	JACnIOI	65535	ü	ü	60	0.376928	0.363254	0.370027	0.746525	0.726037	1.03833	1.01893	0.3039	0.3039	0.55124	0.411746	0.6961	0.681627	0.747054	0.42163	0.595607	0.719792	0.657136	0.775373	0.587881	0.412119	0.224627	0.280208	0.342864	3.12	0.999338	1940.1	2109	820.96	610.98	1170.94
JAC	Jaccard without IOI	JACnIOI	65535	ü	ü	56	0.376597	0.36266	0.369562	0.746525	0.726114	1.03911	1.01932	0.304082	0.304082	0.551409	0.41192	0.695918	0.68133	0.74707	0.421874	0.595602	0.719392	0.657205	0.77584	0.58682	0.41318	0.22416	0.280608	0.342795	3.12	0.999338	1940.92	2110.26	823.08	609.72	1168.82
COS	Cosine without IOI	COSnIOI	65535	ü	ü	84	0.375841	0.361318	0.368507	0.746523	0.727985	1.04387	1.02164	0.30449	0.30449	0.551772	0.411016	0.69551	0.680659	0.747106	0.422409	0.595607	0.718502	0.657339	0.776877	0.584441	0.415559	0.223123	0.281498	0.342661	3.12	0.999338	1936.66	2113.08	827.82	606.9	1164.08
JAC	Jaccard without IOI	JACnIOI	65535	ü	ü	57	0.37669	0.362882	0.36972	0.746495	0.726008	1.03869	1.01911	0.304027	0.304027	0.551356	0.411882	0.695973	0.681441	0.747032	0.421771	0.595568	0.71956	0.657129	0.77558	0.587302	0.412698	0.22442	0.28044	0.342871	3.12	0.999338	1940.74	2109.56	822.12	610.42	1169.78
MRC	Median-Based Robust without IOI	MRCnIOI	65535	ü	ü	16	0.379627	0.367997	0.373766	0.746473	0.733913	1.0719	1.03526	0.302472	0.302472	0.549947	0.411907	0.697528	0.683999	0.746877	0.41967	0.595536	0.72304	0.656587	0.771524	0.596474	0.403526	0.228476	0.27696	0.343413	3.16	0.99933	1940.84	2098.52	803.76	621.44	1188.12
COS	Cosine without IOI	COSnIOI	65535	ü	ü	87	0.375841	0.36147	0.368584	0.74645	0.72782	1.04349	1.02146	0.304477	0.304477	0.55176	0.411093	0.695523	0.680735	0.747024	0.422319	0.595515	0.71865	0.657191	0.776546	0.584924	0.415076	0.223454	0.28135	0.342809	3.12	0.999338	1937.02	2112.18	826.86	607.8	1165.04
JAC	Jaccard without IOI	JACnIOI	65535	ü	ü	62	0.376816	0.363242	0.369966	0.74643	0.726292	1.03854	1.01904	0.303947	0.303947	0.551282	0.411466	0.696053	0.681621	0.746953	0.421596	0.595486	0.71985	0.656966	0.775103	0.588139	0.411861	0.224897	0.28015	0.343034	3.12	0.999338	1938.78	2108.26	820.44	611.72	1171.46
COS	Cosine without IOI	COSnIOI	65535	ü	ü	88	0.375813	0.361504	0.368587	0.746407	0.72793	1.04355	1.02149	0.304485	0.304485	0.551768	0.410957	0.695515	0.680752	0.746977	0.422288	0.59546	0.718702	0.657111	0.776392	0.585112	0.414888	0.223608	0.281298	0.342889	3.12	0.999338	1936.38	2111.76	826.48	608.22	1165.42
MRC	Median-Based Robust without IOI	MRCnIOI	65535	ü	ü	32	0.381177	0.370725	0.375913	0.746402	0.734354	1.07964	1.03898	0.301687	0.301687	0.549231	0.412892	0.698313	0.685362	0.746745	0.418509	0.595447	0.724942	0.656236	0.769234	0.601491	0.398509	0.230766	0.275058	0.343764	3.16	0.99933	1945.48	2092.26	793.8	627.7	1198.08
COS	Cosine without IOI	COSnIOI	65535	ü	ü	7	0.360584	0.332447	0.346227	0.746384	0.760252	1.13641	1.06596	0.313297	0.313297	0.559703	0.402145	0.686703	0.666223	0.748002	0.433101	0.595417	0.700521	0.660062	0.798728	0.533719	0.466281	0.201272	0.299479	0.339938	3.12	0.999338	1894.86	2172.52	928.76	547.46	1063.14
JAC	Jaccard without IOI	JACnIOI	65535	ü	ü	63	0.376744	0.36322	0.369919	0.746378	0.726407	1.03885	1.01919	0.303976	0.303976	0.551309	0.411445	0.696024	0.68161	0.746898	0.421585	0.59542	0.719867	0.656877	0.774969	0.588251	0.411749	0.225031	0.280133	0.343123	3.12	0.999338	1938.68	2107.9	820.22	612.08	1171.68
MRC	Median-Based Robust without IOI	MRCnIOI	65535	ü	ü	35	0.381113	0.370691	0.375864	0.746357	0.73494	1.08269	1.04044	0.301716	0.301716	0.549256	0.413181	0.698284	0.685345	0.746698	0.418503	0.595393	0.724946	0.656167	0.769134	0.601557	0.398443	0.230866	0.275054	0.343833	3.16	0.99933	1946.84	2092	793.68	627.96	1198.2
COS	Cosine without IOI	COSnIOI	65535	ü	ü	89	0.375661	0.361405	0.368463	0.746325	0.727956	1.04347	1.02145	0.304553	0.304553	0.551829	0.410889	0.695447	0.680703	0.746892	0.422295	0.595356	0.71869	0.656971	0.77623	0.585176	0.414824	0.22377	0.28131	0.343029	3.12	0.999338	1936.06	2111.32	826.36	608.66	1165.54
MRC	Median-Based Robust without IOI	MRCnIOI	65535	ü	ü	33	0.381019	0.370608	0.375776	0.746313	0.734295	1.07949	1.03891	0.301759	0.301759	0.549295	0.413045	0.698241	0.685304	0.746654	0.418519	0.595337	0.724922	0.656096	0.769066	0.601542	0.398458	0.230934	0.275078	0.343904	3.16	0.99933	1946.2	2091.82	793.7	628.14	1198.18
PCC	Standard Pearson without IOI	PCCnIOI	65535	ü	ü	6	0.376216	0.36245	0.369267	0.746302	0.744357	1.09937	1.04845	0.304248	0.304248	0.551557	0.408987	0.695752	0.681225	0.746839	0.421857	0.595317	0.719421	0.656795	0.775332	0.587118	0.412882	0.224668	0.280579	0.343205	3.12	0.999338	1927.1	2108.86	822.46	611.12	1169.44
JAC	Jaccard without IOI	JACnIOI	65535	ü	ü	64	0.376582	0.363125	0.369791	0.746283	0.726525	1.03912	1.01932	0.304048	0.304048	0.551375	0.411373	0.695952	0.681562	0.7468	0.421584	0.595298	0.719869	0.656713	0.774764	0.588361	0.411639	0.225236	0.280131	0.343287	3.12	0.999338	1938.34	2107.34	820	612.64	1171.9
JAC	Jaccard without IOI	JACnIOI	65535	ü	ü	61	0.37635	0.362754	0.369489	0.746266	0.726559	1.03909	1.0193	0.304167	0.304167	0.551481	0.411322	0.695833	0.681377	0.746791	0.421728	0.595278	0.719633	0.656718	0.774999	0.587756	0.412244	0.225001	0.280367	0.343282	3.12	0.999338	1938.1	2107.98	821.2	612	1170.7
JAC	Jaccard without IOI	JACnIOI	65535	ü	ü	65	0.376535	0.363096	0.369753	0.746254	0.726708	1.03959	1.01955	0.30407	0.30407	0.551394	0.411305	0.69593	0.681548	0.746769	0.421584	0.595261	0.719871	0.656664	0.774698	0.588398	0.411602	0.225302	0.280129	0.343336	3.12	0.999338	1938.02	2107.16	819.92	612.82	1171.98
MRC	Median-Based Robust without IOI	MRCnIOI	65535	ü	ü	34	0.380797	0.3704	0.375561	0.746215	0.734838	1.08186	1.04005	0.301865	0.301865	0.549392	0.413049	0.698135	0.6852	0.746555	0.418564	0.595212	0.72485	0.655948	0.768941	0.601459	0.398541	0.231059	0.27515	0.344052	3.16	0.99933	1946.22	2091.48	793.86	628.48	1198.02
COS	Cosine without IOI	COSnIOI	65535	ü	ü	90	0.375351	0.361133	0.368172	0.746191	0.728053	1.04365	1.02153	0.304698	0.304698	0.551959	0.410813	0.695302	0.680567	0.746757	0.422349	0.595186	0.718599	0.656752	0.776047	0.585087	0.414913	0.223953	0.281401	0.343248	3.12	0.999338	1935.7	2110.82	826.54	609.16	1165.36
COS	Cosine without IOI	COSnIOI	65535	ü	ü	91	0.375351	0.361222	0.368218	0.746149	0.728155	1.04377	1.02159	0.304689	0.304689	0.551951	0.410736	0.695311	0.680611	0.746709	0.422297	0.595133	0.718685	0.656666	0.775854	0.585368	0.414632	0.224146	0.281315	0.343334	3.12	0.999338	1935.34	2110.3	825.98	609.68	1165.92
MRC	Median-Based Robust without IOI	MRCnIOI	65535	ü	ü	36	0.380757	0.370493	0.375589	0.746137	0.7357	1.08466	1.04139	0.301874	0.301874	0.549399	0.412798	0.698126	0.685246	0.74647	0.418487	0.595113	0.72497	0.655787	0.768636	0.601857	0.398143	0.231364	0.27503	0.344213	3.16	0.99933	1945.04	2090.66	793.08	629.3	1198.8
COS	Cosine without IOI	COSnIOI	65535	ü	ü	93	0.375342	0.3613	0.368253	0.746107	0.728091	1.04359	1.02151	0.304685	0.304685	0.551948	0.410766	0.695315	0.68065	0.746662	0.422248	0.595078	0.718768	0.656574	0.775665	0.585635	0.414365	0.224335	0.281232	0.343426	3.12	0.999338	1935.48	2109.78	825.44	610.2	1166.46
COS	Cosine without IOI	COSnIOI	65535	ü	ü	92	0.375344	0.361314	0.368261	0.746099	0.728007	1.0436	1.02151	0.304685	0.304685	0.551947	0.410876	0.695315	0.680657	0.746653	0.42224	0.595069	0.71878	0.656564	0.775635	0.585678	0.414322	0.224365	0.28122	0.343436	3.12	0.999338	1936	2109.7	825.36	610.28	1166.54
MRC	Median-Based Robust without IOI	MRCnIOI	65535	ü	ü	15	0.378548	0.366912	0.372683	0.746058	0.734333	1.07206	1.03534	0.30299	0.30299	0.550417	0.411415	0.69701	0.683456	0.746466	0.419943	0.595011	0.722586	0.655962	0.771161	0.595751	0.404249	0.228839	0.277414	0.344038	3.16	0.99933	1938.52	2097.54	805.22	622.42	1186.66
JAC	Jaccard without IOI	JACnIOI	65535	ü	ü	66	0.376039	0.362642	0.369279	0.746044	0.726895	1.03982	1.01967	0.304303	0.304303	0.551605	0.411194	0.695697	0.681321	0.746558	0.421682	0.594996	0.719706	0.656333	0.774439	0.588203	0.411797	0.225561	0.280294	0.343667	3.12	0.999338	1937.5	2106.46	820.32	613.52	1171.58
COS	Cosine without IOI	COSnIOI	65535	ü	ü	94	0.37521	0.361231	0.368153	0.746022	0.728108	1.04352	1.02147	0.304744	0.304744	0.552	0.410711	0.695256	0.680616	0.746574	0.422241	0.594972	0.718777	0.656433	0.775473	0.585758	0.414242	0.224527	0.281223	0.343567	3.12	0.999338	1935.22	2109.26	825.2	610.72	1166.7
JAC	Jaccard without IOI	JACnIOI	65535	ü	ü	67	0.376004	0.362638	0.36926	0.74602	0.726865	1.03993	1.01972	0.304316	0.304316	0.551616	0.411258	0.695684	0.681319	0.746532	0.421673	0.594965	0.719721	0.656283	0.774367	0.588271	0.411729	0.225633	0.280279	0.343717	3.12	0.999338	1937.8	2106.26	820.18	613.72	1171.72
MRC	Median-Based Robust without IOI	MRCnIOI	65535	ü	ü	37	0.380456	0.370255	0.37532	0.745988	0.736018	1.0854	1.04174	0.302014	0.302014	0.549524	0.412684	0.697986	0.685128	0.746318	0.418523	0.594925	0.72491	0.655546	0.768387	0.601868	0.398132	0.231613	0.27509	0.344454	3.16	0.99933	1944.5	2089.98	793.06	629.98	1198.82
JAC	Jaccard without IOI	JACnIOI	65535	ü	ü	11	0.371064	0.353917	0.362387	0.745962	0.737515	1.07027	1.03448	0.306981	0.306981	0.554032	0.408406	0.693019	0.676958	0.746722	0.425098	0.594888	0.714037	0.657026	0.780929	0.572988	0.427012	0.219071	0.285963	0.342974	3.12	0.999338	1924.36	2124.12	850.6	595.86	1141.3
JAC	Jaccard without IOI	JACnIOI	-1	ü		39	0.379887	0.369745	0.37478	0.745728	0.723499	1.02491	1.01232	0.302291	0.302291	0.549777	0.410439	0.697709	0.684872	0.746057	0.418634	0.594596	0.724722	0.655164	0.768051	0.601694	0.398306	0.231949	0.275278	0.344836	3.12	0.999338	1933.94	2089.08	793.46	630.9	1198.44
COS	Cosine without IOI	COSnIOI	65535	ü	ü	95	0.375148	0.361247	0.36813	0.745957	0.728083	1.04366	1.02154	0.30477	0.30477	0.552024	0.410796	0.69523	0.680623	0.746504	0.42221	0.594889	0.718829	0.656319	0.775274	0.585972	0.414028	0.224726	0.281171	0.343681	3.12	0.999338	1935.62	2108.72	824.78	611.26	1167.12
JAC	Jaccard without IOI	JACnIOI	-1	ü		40	0.379714	0.369552	0.374597	0.74568	0.723495	1.02489	1.01231	0.302372	0.302372	0.54985	0.41046	0.697628	0.684776	0.74601	0.418691	0.594535	0.724625	0.655089	0.768056	0.601496	0.398504	0.231944	0.275375	0.344911	3.12	0.999338	1934.04	2089.1	793.86	630.88	1198.04
JAC	Jaccard without IOI	JACnIOI	65535	ü	ü	12	0.37134	0.354477	0.362809	0.745934	0.735757	1.06595	1.0324	0.306828	0.306828	0.553895	0.409047	0.693172	0.677238	0.746676	0.424873	0.59485	0.714416	0.656924	0.780422	0.574055	0.425945	0.219578	0.285584	0.343076	3.12	0.999338	1927.38	2122.72	848.48	597.26	1143.42
JAC	Jaccard without IOI	JACnIOI	-1	ü		36	0.379505	0.369297	0.374365	0.745626	0.723635	1.02566	1.01269	0.302474	0.302474	0.54994	0.410537	0.697526	0.684648	0.745959	0.418773	0.594468	0.72449	0.655015	0.768094	0.601202	0.398798	0.231906	0.27551	0.344985	3.12	0.999338	1934.4	2089.2	794.44	630.78	1197.46
JAC	Jaccard without IOI	JACnIOI	-1	ü		37	0.379478	0.369313	0.37436	0.745587	0.723686	1.02545	1.01259	0.302486	0.302486	0.549956	0.410367	0.697514	0.684657	0.745918	0.418751	0.594415	0.724529	0.654949	0.767971	0.601342	0.398658	0.232029	0.275471	0.345051	3.12	0.999338	1933.6	2088.86	794.16	631.12	1197.74
JAC	Jaccard without IOI	JACnIOI	-1	ü		35	0.379153	0.368828	0.373953	0.745563	0.723716	1.02581	1.01277	0.302643	0.302643	0.550096	0.410473	0.697357	0.684414	0.745902	0.418944	0.594387	0.724211	0.654942	0.768271	0.600557	0.399443	0.231729	0.275789	0.345058	3.12	0.999338	1934.1	2089.68	795.72	630.3	1196.18
COS	Cosine without IOI	COSnIOI	65535	ü	ü	98	0.375048	0.361227	0.368071	0.745883	0.728147	1.04344	1.02144	0.304808	0.304808	0.552059	0.410579	0.695192	0.680613	0.746424	0.422188	0.594794	0.718866	0.656182	0.775067	0.58616	0.41384	0.224933	0.281134	0.343818	3.12	0.999338	1934.6	2108.16	824.4	611.82	1167.5
JAC	Jaccard without IOI	JACnIOI	-1	ü		38	0.379404	0.369283	0.374308	0.745539	0.723936	1.02551	1.01262	0.302516	0.302516	0.549983	0.41004	0.697484	0.684642	0.745867	0.418742	0.594354	0.724542	0.654861	0.76785	0.601433	0.398567	0.23215	0.275458	0.345139	3.12	0.999338	1932.06	2088.54	793.98	631.44	1197.92
JAC	Jaccard without IOI	JACnIOI	65535	ü	ü	69	0.375833	0.362635	0.369174	0.745866	0.727001	1.0403	1.0199	0.304388	0.304388	0.551681	0.411229	0.695612	0.681317	0.746368	0.421614	0.59477	0.719818	0.656015	0.773926	0.588709	0.411291	0.226074	0.280182	0.343985	3.12	0.999338	1937.66	2105.06	819.32	614.92	1172.58
COS	Cosine without IOI	COSnIOI	65535	ü	ü	96	0.374891	0.361011	0.367884	0.745853	0.728232	1.04386	1.02164	0.304889	0.304889	0.552132	0.410651	0.695111	0.680505	0.746399	0.422262	0.594757	0.718742	0.656148	0.775149	0.585861	0.414139	0.224851	0.281258	0.343852	3.12	0.999338	1934.94	2108.38	825	611.6	1166.9
JAC	Jaccard without IOI	JACnIOI	-1	ü		42	0.379179	0.369045	0.374076	0.745456	0.723826	1.02569	1.01271	0.302627	0.302627	0.550083	0.410286	0.697373	0.684522	0.745786	0.418808	0.59425	0.724434	0.654744	0.767799	0.601246	0.398754	0.232201	0.275566	0.345256	3.12	0.999338	1933.22	2088.4	794.36	631.58	1197.54
JAC	Jaccard without IOI	JACnIOI	65535	ü	ü	68	0.375717	0.362491	0.369044	0.745839	0.726992	1.04024	1.01987	0.304443	0.304443	0.551731	0.41122	0.695557	0.681246	0.746344	0.421659	0.594735	0.719743	0.655974	0.773954	0.588537	0.411463	0.226046	0.280257	0.344026	3.12	0.999338	1937.62	2105.14	819.66	614.84	1172.24
JAC	Jaccard without IOI	JACnIOI	-1	ü		41	0.379202	0.369132	0.374132	0.74543	0.723767	1.02533	1.01253	0.302609	0.302609	0.550065	0.410214	0.697391	0.684566	0.745755	0.418759	0.594219	0.724513	0.654689	0.76765	0.601483	0.398517	0.23235	0.275487	0.345311	3.12	0.999338	1932.88	2088	793.88	631.98	1198.02
COS	Cosine without IOI	COSnIOI	65535	ü	ü	99	0.375012	0.361254	0.368068	0.745838	0.728282	1.04359	1.02151	0.304821	0.304821	0.55207	0.410426	0.695179	0.680627	0.746377	0.422158	0.594738	0.718916	0.656096	0.774915	0.58634	0.41366	0.225085	0.281084	0.343904	3.12	0.999338	1933.88	2107.74	824.04	612.24	1167.86
JAC	Jaccard without IOI	JACnIOI	-1	ü		44	0.378735	0.368567	0.373615	0.745298	0.724085	1.02599	1.01286	0.302839	0.302839	0.550277	0.410057	0.697161	0.684283	0.74563	0.418943	0.594048	0.724219	0.654516	0.767704	0.600863	0.399137	0.232296	0.275781	0.345484	3.12	0.999338	1932.14	2088.14	795.1	631.84	1196.8
JAC	Jaccard without IOI	JACnIOI	-1	ü		33	0.378767	0.368656	0.373676	0.745286	0.724331	1.02699	1.01335	0.302822	0.302822	0.550258	0.410129	0.697178	0.684328	0.745614	0.418902	0.594035	0.724282	0.654485	0.767605	0.601051	0.398949	0.232395	0.275718	0.345515	3.12	0.999338	1932.48	2087.86	794.74	632.12	1197.16
JAC	Jaccard without IOI	JACnIOI	-1	ü		43	0.378678	0.368544	0.373575	0.745259	0.724093	1.02618	1.01296	0.302864	0.302864	0.550298	0.410116	0.697136	0.684272	0.745589	0.418935	0.594001	0.724229	0.654449	0.767609	0.600935	0.399065	0.232391	0.275771	0.345551	3.12	0.999338	1932.42	2087.88	794.96	632.1	1196.94
JAC	Jaccard without IOI	JACnIOI	-1	ü		34	0.37849	0.368327	0.373372	0.745207	0.724183	1.02691	1.01331	0.302957	0.302957	0.550379	0.410307	0.697043	0.684163	0.74554	0.419002	0.593938	0.724112	0.654377	0.767632	0.600694	0.399306	0.232368	0.275888	0.345623	3.12	0.999338	1933.32	2087.94	795.46	632.04	1196.44
COS	Cosine without IOI	COSnIOI	65535	ü	ü	97	0.374804	0.360948	0.367809	0.745806	0.728295	1.04374	1.02158	0.304927	0.304927	0.552166	0.41052	0.695073	0.680474	0.746351	0.422269	0.594698	0.718731	0.656072	0.775059	0.585889	0.414111	0.224941	0.281269	0.343928	3.12	0.999338	1934.32	2108.14	824.94	611.84	1166.96
JAC	Jaccard without IOI	JACnIOI	-1	ü		45	0.378531	0.368488	0.373474	0.745148	0.724123	1.02629	1.01301	0.302932	0.302932	0.550363	0.410146	0.697068	0.684244	0.745474	0.41891	0.593856	0.724271	0.65426	0.767329	0.601158	0.398842	0.232671	0.275729	0.34574	3.12	0.999338	1932.56	2087.12	794.52	632.86	1197.38
JAC	Jaccard without IOI	JACnIOI	-1	ü		32	0.378541	0.368589	0.37353	0.745111	0.724335	1.02726	1.01349	0.302924	0.302924	0.550353	0.410138	0.697076	0.684295	0.745433	0.418851	0.593809	0.724366	0.654175	0.767145	0.601444	0.398556	0.232855	0.275634	0.345825	3.12	0.999338	1932.52	2086.6	793.96	633.38	1197.94
COS	Cosine without IOI	COSnIOI	65535	ü	ü	100	0.374891	0.361159	0.36796	0.745779	0.728393	1.0438	1.02161	0.304876	0.304876	0.552121	0.410354	0.695124	0.68058	0.746315	0.422173	0.594661	0.718893	0.655998	0.774812	0.586347	0.413653	0.225188	0.281107	0.344002	3.12	0.999338	1933.54	2107.46	824.02	612.52	1167.88
JAC	Jaccard without IOI	JACnIOI	65535	ü	ü	70	0.375575	0.362425	0.36894	0.745743	0.727179	1.04046	1.01998	0.304507	0.304507	0.551789	0.411025	0.695493	0.681213	0.746243	0.421649	0.594613	0.71976	0.655815	0.773728	0.588697	0.411303	0.226272	0.28024	0.344185	3.12	0.999338	1936.7	2104.52	819.34	615.46	1172.56
JAC	Jaccard without IOI	JACnIOI	65535	ü	ü	72	0.375549	0.362457	0.368944	0.7457	0.727183	1.04013	1.01982	0.304515	0.304515	0.551795	0.410906	0.695485	0.681229	0.746197	0.42162	0.594561	0.719808	0.655741	0.77358	0.588878	0.411122	0.22642	0.280192	0.344259	3.12	0.999338	1936.14	2104.12	818.98	615.86	1172.92
JAC	Jaccard without IOI	JACnIOI	65535	ü	ü	71	0.375437	0.362356	0.368837	0.745661	0.727217	1.04021	1.01986	0.304566	0.304566	0.551843	0.410889	0.695434	0.681178	0.746157	0.421643	0.594508	0.719771	0.655667	0.773538	0.588817	0.411183	0.226462	0.280229	0.344333	3.12	0.999338	1936.06	2104	819.1	615.98	1172.8
JAC	Jaccard without IOI	JACnIOI	-1	ü		48	0.37788	0.367782	0.372796	0.744931	0.72431	1.02599	1.01286	0.303246	0.303246	0.550643	0.409777	0.696754	0.683891	0.745261	0.419113	0.593587	0.723929	0.653951	0.767254	0.600529	0.399471	0.232746	0.276071	0.346049	3.12	0.999338	1930.82	2086.92	795.8	633.06	1196.1
JAC	Jaccard without IOI	JACnIOI	-1	ü		46	0.378074	0.368113	0.373059	0.744928	0.72442	1.0266	1.01316	0.303144	0.303144	0.550553	0.40987	0.696856	0.684057	0.74525	0.418973	0.59358	0.724164	0.65391	0.76698	0.601133	0.398867	0.23302	0.275836	0.34609	3.12	0.999338	1931.26	2086.18	794.58	633.8	1197.32
JAC	Jaccard without IOI	JACnIOI	-1	ü		47	0.377945	0.367891	0.372882	0.744926	0.724437	1.02628	1.013	0.303212	0.303212	0.550615	0.409739	0.696788	0.683945	0.745253	0.419066	0.593578	0.724011	0.653933	0.76715	0.600741	0.399259	0.23285	0.275989	0.346067	3.12	0.999338	1930.64	2086.64	795.36	633.34	1196.54
JAC	Jaccard without IOI	JACnIOI	-1	ü		30	0.377911	0.367889	0.372865	0.74491	0.724667	1.02853	1.01411	0.303225	0.303225	0.550625	0.410159	0.696775	0.683944	0.745237	0.419056	0.593556	0.724031	0.65388	0.767095	0.600793	0.399207	0.232905	0.275969	0.34612	3.12	0.999338	1932.62	2086.46	795.24	633.52	1196.66
JAC	Jaccard without IOI	JACnIOI	-1	ü		31	0.377622	0.367578	0.372565	0.744813	0.724917	1.02825	1.01398	0.303365	0.303365	0.550753	0.4097	0.696635	0.683789	0.745141	0.419148	0.593432	0.723879	0.653744	0.767059	0.60052	0.39948	0.232941	0.276121	0.346256	3.12	0.999338	1930.46	2086.36	795.8	633.62	1196.1
JAC	Jaccard without IOI	JACnIOI	-1	ü		22	0.378054	0.368383	0.373186	0.744763	0.72661	1.03281	1.01622	0.30314	0.30314	0.550544	0.409327	0.69686	0.684191	0.74507	0.418787	0.593373	0.724466	0.653588	0.766289	0.602093	0.397907	0.233711	0.275534	0.346412	3.12	0.999338	1928.7	2084.28	792.66	635.7	1199.24
JAC	Jaccard without IOI	JACnIOI	-1	ü		50	0.377659	0.367723	0.372656	0.744755	0.724747	1.02684	1.01327	0.303344	0.303344	0.550729	0.409497	0.696656	0.683861	0.745076	0.419064	0.593366	0.724007	0.653652	0.76679	0.600933	0.399067	0.23321	0.275993	0.346348	3.12	0.999338	1929.5	2085.66	795	634.32	1196.9
MRC	Median-Based Robust without IOI	MRCnIOI	65535	ü	ü	38	0.379743	0.369653	0.374663	0.745645	0.736625	1.08744	1.04272	0.302349	0.302349	0.549832	0.412489	0.697651	0.684827	0.745971	0.418631	0.594488	0.724736	0.655007	0.767856	0.601797	0.398203	0.232144	0.275264	0.344993	3.16	0.99933	1943.58	2088.54	793.2	631.42	1198.68
JAC	Jaccard without IOI	JACnIOI	-1	ü		21	0.378002	0.368345	0.373141	0.744739	0.726441	1.03316	1.01639	0.303166	0.303166	0.550568	0.409658	0.696834	0.684173	0.745047	0.41879	0.593341	0.724461	0.653541	0.766249	0.602096	0.397904	0.233751	0.275539	0.346459	3.12	0.999338	1930.26	2084.16	792.66	635.82	1199.24
JAC	Jaccard without IOI	JACnIOI	-1	ü		49	0.377476	0.367496	0.372451	0.744707	0.724819	1.02687	1.01329	0.303433	0.303433	0.550812	0.409425	0.696567	0.683748	0.745031	0.419138	0.593303	0.72389	0.653586	0.76682	0.600676	0.399324	0.23318	0.27611	0.346414	3.12	0.999338	1929.16	2085.74	795.5	634.24	1196.4
JAC	Jaccard without IOI	JACnIOI	-1	ü		53	0.377584	0.367761	0.372639	0.744671	0.724645	1.02664	1.01318	0.303373	0.303373	0.55076	0.40948	0.696627	0.683881	0.744988	0.41901	0.593253	0.724099	0.653484	0.766509	0.601252	0.398748	0.233491	0.275901	0.346516	3.12	0.999338	1929.42	2084.88	794.36	635.1	1197.54
JAC	Jaccard without IOI	JACnIOI	65535	ü	ü	73	0.375268	0.362251	0.368701	0.745559	0.727349	1.04052	1.02001	0.304643	0.304643	0.551912	0.410855	0.695357	0.681125	0.746052	0.421645	0.59438	0.719768	0.6555	0.773324	0.588927	0.411073	0.226676	0.280232	0.3445	3.12	0.999338	1935.9	2103.42	818.88	616.56	1173.02
JAC	Jaccard without IOI	JACnIOI	-1	ü		52	0.377347	0.367479	0.372379	0.744601	0.724832	1.02685	1.01328	0.303488	0.303488	0.550863	0.409335	0.696512	0.683739	0.744919	0.419101	0.593167	0.723949	0.653398	0.766527	0.600951	0.399049	0.233473	0.276051	0.346602	3.12	0.999338	1928.74	2084.94	794.96	635.04	1196.94
JAC	Jaccard without IOI	JACnIOI	-1	ü		23	0.377565	0.367859	0.372679	0.744589	0.726339	1.03217	1.01591	0.303373	0.303373	0.550758	0.409505	0.696627	0.683929	0.744898	0.418937	0.593153	0.724224	0.653341	0.766189	0.60167	0.39833	0.233811	0.275776	0.346659	3.12	0.999338	1929.54	2084.02	793.5	635.96	1198.4
MRC	Median-Based Robust without IOI	MRCnIOI	65535	ü	ü	39	0.379469	0.369372	0.374385	0.745556	0.737177	1.08881	1.04338	0.302472	0.302472	0.549943	0.412141	0.697528	0.684686	0.745882	0.418704	0.594375	0.724614	0.654855	0.7678	0.601572	0.398428	0.2322	0.275386	0.345145	3.16	0.99933	1941.94	2088.4	793.64	631.56	1198.24
JAC	Jaccard without IOI	JACnIOI	-1	ü		51	0.377275	0.367421	0.372314	0.744564	0.724798	1.0267	1.0132	0.303522	0.303522	0.550891	0.409335	0.696478	0.683711	0.744882	0.419108	0.593123	0.723934	0.653341	0.766467	0.600954	0.399046	0.233533	0.276066	0.346659	3.12	0.999338	1928.74	2084.78	794.96	635.2	1196.94
JAC	Jaccard without IOI	JACnIOI	-1	ü		24	0.377172	0.367266	0.372185	0.744564	0.725918	1.03166	1.01566	0.303564	0.303564	0.55093	0.409925	0.696436	0.683633	0.744882	0.41917	0.59312	0.723843	0.653329	0.766559	0.600707	0.399293	0.233441	0.276157	0.346671	3.12	0.999338	1931.52	2085.02	795.4	634.96	1196.5
JAC	Jaccard without IOI	JACnIOI	-1	ü		54	0.377262	0.367495	0.372345	0.744518	0.725125	1.02759	1.01365	0.303526	0.303526	0.550898	0.409128	0.696474	0.683747	0.744833	0.419057	0.593059	0.72402	0.653242	0.766276	0.601219	0.398781	0.233724	0.27598	0.346758	3.12	0.999338	1927.76	2084.24	794.44	635.74	1197.46
JAC	Jaccard without IOI	JACnIOI	65535	ü	ü	75	0.375191	0.362294	0.368685	0.745471	0.727552	1.04059	1.02004	0.304668	0.304668	0.551935	0.410596	0.695332	0.681147	0.745957	0.421591	0.594268	0.719858	0.655333	0.773028	0.589266	0.410734	0.226972	0.280142	0.344667	3.12	0.999338	1934.68	2102.62	818.2	617.36	1173.7
JAC	Jaccard without IOI	JACnIOI	-1	ü		57	0.377216	0.367472	0.372311	0.744478	0.724964	1.02752	1.01361	0.303547	0.303547	0.550919	0.409331	0.696453	0.683736	0.744791	0.419052	0.593008	0.724031	0.653184	0.766178	0.601294	0.398706	0.233822	0.275969	0.346816	3.12	0.999338	1928.72	2083.98	794.28	636	1197.62
JAC	Jaccard without IOI	JACnIOI	65535	ü	ü	74	0.375093	0.362137	0.368557	0.745466	0.727514	1.04059	1.02004	0.304719	0.304719	0.551981	0.410643	0.695281	0.681068	0.745955	0.421652	0.59426	0.719758	0.655335	0.773133	0.589004	0.410996	0.226867	0.280242	0.344665	3.12	0.999338	1934.9	2102.9	818.72	617.08	1173.18
JAC	Jaccard without IOI	JACnIOI	65535	ü	ü	76	0.375188	0.362338	0.368706	0.745444	0.727586	1.04091	1.0202	0.304668	0.304668	0.551935	0.410664	0.695332	0.681169	0.745927	0.421563	0.594233	0.719903	0.655285	0.772918	0.58942	0.41058	0.227082	0.280097	0.344715	3.12	0.999338	1935	2102.32	817.9	617.66	1174
JAC	Jaccard without IOI	JACnIOI	65535	ü	ü	77	0.375035	0.362188	0.368554	0.745384	0.727603	1.04088	1.02018	0.30474	0.30474	0.552	0.410647	0.69526	0.681094	0.745867	0.4216	0.594158	0.719842	0.655192	0.772859	0.589329	0.410671	0.227141	0.280158	0.344808	3.12	0.999338	1934.92	2102.16	818.08	617.82	1173.82
JAC	Jaccard without IOI	JACnIOI	-1	ü		29	0.376942	0.367113	0.371994	0.744434	0.724874	1.02846	1.01408	0.303675	0.303675	0.551033	0.409968	0.696325	0.683557	0.74475	0.419178	0.59295	0.723832	0.65311	0.766302	0.600811	0.399189	0.233698	0.276168	0.34689	3.12	0.999338	1931.72	2084.3	795.2	635.68	1196.7
MRC	Median-Based Robust without IOI	MRCnIOI	65535	ü	ü	40	0.379124	0.369155	0.374105	0.745357	0.737436	1.09001	1.04395	0.302629	0.302629	0.550086	0.412187	0.697371	0.684578	0.745676	0.418709	0.59412	0.724606	0.654518	0.767383	0.601772	0.398228	0.232617	0.275394	0.345482	3.16	0.99933	1942.16	2087.26	793.24	632.7	1198.64
JAC	Jaccard without IOI	JACnIOI	-1	ü		55	0.377125	0.367436	0.372248	0.744415	0.725133	1.02748	1.01359	0.303586	0.303586	0.550952	0.409085	0.696414	0.683718	0.744725	0.419039	0.592929	0.724053	0.653072	0.766016	0.60142	0.39858	0.233984	0.275947	0.346928	3.12	0.999338	1927.56	2083.54	794.02	636.44	1197.88
MRC	Median-Based Robust without IOI	MRCnIOI	65535	ü	ü	10	0.375547	0.363194	0.369317	0.745288	0.739431	1.08411	1.04115	0.304463	0.304463	0.55176	0.409488	0.695537	0.681597	0.745741	0.421149	0.594026	0.720608	0.654939	0.771779	0.591415	0.408585	0.228221	0.279392	0.345061	3.16	0.99933	1929.44	2099.22	813.84	620.74	1178.04
JAC	Jaccard without IOI	JACnIOI	-1	ü		56	0.377016	0.36728	0.372115	0.744398	0.725197	1.02778	1.01374	0.303641	0.303641	0.551003	0.409115	0.696359	0.68364	0.744711	0.419096	0.592907	0.723959	0.653057	0.766089	0.601192	0.398808	0.233911	0.276041	0.346943	3.12	0.999338	1927.7	2083.74	794.48	636.24	1197.42
JAC	Jaccard without IOI	JACnIOI	-1	ü		20	0.377387	0.3679	0.372612	0.74438	0.726903	1.03362	1.01662	0.303459	0.303459	0.550835	0.409284	0.696541	0.68395	0.74468	0.418829	0.592886	0.724402	0.652985	0.765558	0.602342	0.397658	0.234442	0.275598	0.347015	3.12	0.999338	1928.5	2082.28	792.16	637.7	1199.74
JAC	Jaccard without IOI	JACnIOI	-1	ü		25	0.376732	0.366877	0.371771	0.74436	0.725477	1.03037	1.01502	0.303777	0.303777	0.551126	0.410006	0.696223	0.683439	0.744678	0.419247	0.592857	0.723721	0.653011	0.766271	0.600606	0.399394	0.233729	0.276279	0.346989	3.12	0.999338	1931.9	2084.22	795.6	635.76	1196.3
JAC	Jaccard without IOI	JACnIOI	-1	ü		27	0.376538	0.366562	0.371515	0.74435	0.725057	1.02928	1.01448	0.303883	0.303883	0.551222	0.410125	0.696117	0.683281	0.744676	0.419378	0.592845	0.723502	0.653036	0.766502	0.60006	0.39994	0.233498	0.276498	0.346964	3.12	0.999338	1932.46	2084.84	796.72	635.14	1195.18
MRC	Median-Based Robust without IOI	MRCnIOI	65535	ü	ü	12	0.375698	0.363523	0.369559	0.745257	0.737423	1.07949	1.03893	0.304378	0.304378	0.551678	0.410315	0.695622	0.681761	0.7457	0.420998	0.59399	0.720851	0.654847	0.771433	0.59209	0.40791	0.228567	0.279149	0.345153	3.16	0.99933	1933.34	2098.28	812.5	621.68	1179.38
JAC	Jaccard without IOI	JACnIOI	-1	ü		58	0.376963	0.367287	0.372093	0.744344	0.725201	1.02771	1.01371	0.303662	0.303662	0.551024	0.409043	0.696338	0.683644	0.744654	0.41907	0.592838	0.724001	0.652962	0.765925	0.601362	0.398638	0.234075	0.275999	0.347038	3.12	0.999338	1927.36	2083.3	794.14	636.68	1197.76
MRC	Median-Based Robust without IOI	MRCnIOI	65535	ü	ü	11	0.375399	0.363016	0.369154	0.745248	0.73859	1.0824	1.04032	0.304535	0.304535	0.551824	0.410082	0.695465	0.681508	0.745703	0.421201	0.593975	0.720521	0.654878	0.771795	0.591221	0.408779	0.228205	0.279479	0.345122	3.16	0.99933	1932.24	2099.26	814.22	620.7	1177.66
MRC	Median-Based Robust without IOI	MRCnIOI	65535	ü	ü	14	0.376127	0.364313	0.370171	0.745233	0.736052	1.07516	1.03684	0.304153	0.304153	0.551475	0.410421	0.695847	0.682156	0.745654	0.420668	0.593959	0.721393	0.654734	0.770759	0.593554	0.406446	0.229241	0.278607	0.345266	3.16	0.99933	1933.84	2096.44	809.6	623.52	1182.28
MRC	Median-Based Robust without IOI	MRCnIOI	65535	ü	ü	13	0.375893	0.363908	0.36985	0.745232	0.73691	1.07634	1.03741	0.304276	0.304276	0.551585	0.409747	0.695724	0.681954	0.745663	0.420837	0.59396	0.721111	0.654782	0.771078	0.59283	0.40717	0.228922	0.278889	0.345218	3.16	0.99933	1930.66	2097.32	811.06	622.64	1180.82
JAC	Jaccard without IOI	JACnIOI	-1	ü		28	0.376599	0.366763	0.371647	0.744291	0.725057	1.02938	1.01453	0.303845	0.303845	0.551186	0.410138	0.696155	0.683382	0.744609	0.419268	0.592772	0.723684	0.652915	0.766171	0.600592	0.399408	0.233829	0.276316	0.347085	3.12	0.999338	1932.52	2083.94	795.64	636.04	1196.26
JAC	Jaccard without IOI	JACnIOI	65535	ü	ü	78	0.374595	0.361819	0.368151	0.745181	0.727799	1.04102	1.02025	0.304944	0.304944	0.552184	0.410469	0.695056	0.68091	0.74566	0.421666	0.5939	0.719731	0.654864	0.772549	0.58927	0.41073	0.227451	0.280269	0.345136	3.12	0.999338	1934.08	2101.32	818.2	618.66	1173.7
JAC	Jaccard without IOI	JACnIOI	65535	ü	ü	79	0.374479	0.361777	0.368072	0.745098	0.727837	1.04102	1.02025	0.304995	0.304995	0.55223	0.410422	0.695005	0.680889	0.745574	0.42165	0.593796	0.719757	0.654722	0.772343	0.589434	0.410566	0.227657	0.280243	0.345278	3.12	0.999338	1933.86	2100.76	817.88	619.22	1174.02
JAC	Jaccard without IOI	JACnIOI	-1	ü		60	0.376761	0.367149	0.371923	0.744223	0.725397	1.0277	1.0137	0.30376	0.30376	0.551113	0.408703	0.69624	0.683575	0.744529	0.41908	0.592683	0.723988	0.652774	0.765685	0.601464	0.398536	0.234315	0.276012	0.347226	3.12	0.999338	1925.76	2082.64	793.94	637.34	1197.96
JAC	Jaccard without IOI	JACnIOI	-1	ü		26	0.37627	0.36639	0.371296	0.744195	0.725362	1.03024	1.01496	0.303997	0.303997	0.551326	0.410091	0.696003	0.683195	0.744514	0.419381	0.592649	0.723498	0.652772	0.76617	0.60022	0.39978	0.23383	0.276502	0.347228	3.12	0.999338	1932.3	2083.96	796.38	636.02	1195.52
JAC	Jaccard without IOI	JACnIOI	-1	ü		59	0.376674	0.367064	0.371837	0.744192	0.725443	1.02786	1.01378	0.303798	0.303798	0.551147	0.408741	0.696202	0.683532	0.744499	0.419101	0.592644	0.723955	0.65272	0.765656	0.601408	0.398592	0.234344	0.276045	0.34728	3.12	0.999338	1925.94	2082.56	794.04	637.42	1197.86
JAC	Jaccard without IOI	JACnIOI	-1	ü		61	0.376682	0.36708	0.371848	0.744189	0.725329	1.02775	1.01373	0.303798	0.303798	0.551149	0.408864	0.696202	0.68354	0.744496	0.419094	0.592638	0.723963	0.652718	0.765642	0.601438	0.398562	0.234358	0.276037	0.347282	3.12	0.999338	1926.52	2082.52	794	637.46	1197.9
JAC	Jaccard without IOI	JACnIOI	65535	ü	ü	80	0.374453	0.361779	0.36806	0.745075	0.727934	1.04122	1.02035	0.305003	0.305003	0.552239	0.410358	0.694997	0.680889	0.745549	0.421639	0.593766	0.719777	0.654675	0.77227	0.589509	0.410491	0.22773	0.280223	0.345325	3.12	0.999338	1933.56	2100.56	817.72	619.42	1174.18
MRC	Median-Based Robust without IOI	MRCnIOI	65535	ü	ü	41	0.378571	0.368728	0.373616	0.745069	0.737924	1.091	1.04443	0.302888	0.302888	0.550321	0.411797	0.697112	0.684364	0.745382	0.418763	0.593754	0.724516	0.654055	0.766876	0.601852	0.398148	0.233124	0.275484	0.345945	3.16	0.99933	1940.32	2085.88	793.08	634.08	1198.8
JAC	Jaccard without IOI	JACnIOI	65535	ü	ü	10	0.369106	0.352409	0.360659	0.745048	0.740146	1.07657	1.03753	0.307856	0.307856	0.554818	0.407298	0.692144	0.676204	0.745784	0.425329	0.593729	0.713649	0.655456	0.77939	0.573018	0.426982	0.22061	0.286351	0.344544	3.12	0.999338	1919.14	2119.94	850.54	600.04	1141.36
JAC	Jaccard without IOI	JACnIOI	-1	ü		19	0.376461	0.366887	0.371642	0.744075	0.727506	1.03423	1.01692	0.303904	0.303904	0.551242	0.408699	0.696096	0.683444	0.744381	0.419123	0.592497	0.723919	0.652541	0.765455	0.601433	0.398567	0.234545	0.276081	0.347459	3.12	0.999338	1925.74	2082	793.98	637.98	1197.92
MRC	Median-Based Robust without IOI	MRCnIOI	65535	ü	ü	42	0.378188	0.368324	0.373222	0.744938	0.738196	1.09164	1.04474	0.30307	0.30307	0.550488	0.411759	0.69693	0.684162	0.745253	0.418878	0.593587	0.724327	0.653861	0.766809	0.601514	0.398486	0.233191	0.275673	0.346139	3.16	0.99933	1940.14	2085.7	793.76	634.26	1198.12
JAC	Jaccard without IOI	JACnIOI	-1	ü		63	0.37642	0.366862	0.371609	0.74406	0.725592	1.0282	1.01395	0.303921	0.303921	0.551261	0.408678	0.696079	0.683431	0.744364	0.419133	0.592475	0.723902	0.652518	0.765436	0.601426	0.398574	0.234564	0.276098	0.347482	3.12	0.999338	1925.64	2081.96	794.02	638.02	1197.88
JAC	Jaccard without IOI	JACnIOI	65535	ü	ü	81	0.374177	0.361568	0.367818	0.744936	0.728049	1.04134	1.02041	0.305131	0.305131	0.552354	0.410231	0.694869	0.680784	0.745407	0.421667	0.593589	0.71973	0.654448	0.772027	0.589541	0.410459	0.227973	0.28027	0.345552	3.12	0.999338	1932.96	2099.9	817.66	620.08	1174.24
JAC	Jaccard without IOI	JACnIOI	-1	ü		62	0.376187	0.36664	0.371381	0.743965	0.725677	1.02832	1.01401	0.304031	0.304031	0.55136	0.408567	0.695969	0.68332	0.744269	0.419185	0.592356	0.723815	0.652372	0.765333	0.601307	0.398693	0.234667	0.276185	0.347628	3.12	0.999338	1925.12	2081.68	794.26	638.3	1197.64
JAC	Jaccard without IOI	JACnIOI	-1	ü		64	0.37596	0.366424	0.37116	0.743873	0.725808	1.02841	1.01405	0.304133	0.304133	0.551453	0.408508	0.695867	0.683212	0.744175	0.419234	0.592238	0.723738	0.652223	0.765219	0.601205	0.398795	0.234781	0.276262	0.347777	3.12	0.999338	1924.84	2081.38	794.44	638.6	1197.46
JAC	Jaccard without IOI	JACnIOI	-1	ü		18	0.375966	0.366413	0.371157	0.743871	0.727833	1.03508	1.01734	0.304142	0.304142	0.551459	0.408661	0.695858	0.683206	0.744177	0.419237	0.592235	0.723738	0.652228	0.765227	0.601186	0.398814	0.234773	0.276262	0.347772	3.12	0.999338	1925.56	2081.36	794.46	638.62	1197.44
JAC	Jaccard without IOI	JACnIOI	-1	ü		65	0.375837	0.366356	0.371065	0.743787	0.725876	1.02867	1.01418	0.304193	0.304193	0.551506	0.408529	0.695807	0.683178	0.744087	0.419227	0.592131	0.723748	0.652089	0.765028	0.601328	0.398672	0.234972	0.276252	0.347911	3.12	0.999338	1924.94	2080.86	794.2	639.12	1197.7
JAC	Jaccard without IOI	JACnIOI	-1	ü		66	0.375557	0.366048	0.370771	0.743704	0.725919	1.02885	1.01427	0.304324	0.304324	0.551625	0.408529	0.695676	0.683024	0.744005	0.419321	0.592025	0.723594	0.651963	0.76502	0.601028	0.398972	0.23498	0.276406	0.348037	3.12	0.999338	1924.94	2080.84	794.8	639.14	1197.1
JAC	Jaccard without IOI	JACnIOI	-1	ü		17	0.375544	0.366047	0.370763	0.743677	0.728173	1.03628	1.01793	0.304337	0.304337	0.551635	0.408703	0.695663	0.683023	0.74398	0.419308	0.591991	0.723622	0.651922	0.764943	0.601104	0.398896	0.235057	0.276378	0.348078	3.12	0.999338	1925.76	2080.6	794.62	639.38	1197.28
JAC	Jaccard without IOI	JACnIOI	-1	ü		68	0.37555	0.366107	0.370797	0.743662	0.726122	1.02898	1.01434	0.304324	0.304324	0.551625	0.408329	0.695676	0.683054	0.74396	0.419277	0.591972	0.723666	0.651884	0.764851	0.601256	0.398744	0.235149	0.276334	0.348116	3.12	0.999338	1924	2080.38	794.34	639.6	1197.56
JAC	Jaccard without IOI	JACnIOI	-1	ü		67	0.375576	0.366167	0.37084	0.743652	0.726046	1.02894	1.01432	0.304312	0.304312	0.551613	0.408414	0.695688	0.683083	0.743949	0.419249	0.59196	0.723712	0.651864	0.764779	0.601388	0.398612	0.235221	0.276288	0.348136	3.12	0.999338	1924.4	2080.18	794.08	639.8	1197.82
JAC	Jaccard without IOI	JACnIOI	-1	ü		71	0.375619	0.366262	0.37091	0.743633	0.72625	1.02912	1.0144	0.30429	0.30429	0.551594	0.408245	0.69571	0.683131	0.743927	0.419201	0.591936	0.72379	0.651829	0.764653	0.60161	0.39839	0.235347	0.27621	0.348171	3.12	0.999338	1923.6	2079.84	793.64	640.14	1198.26
JAC	Jaccard without IOI	JACnIOI	-1	ü		69	0.375459	0.366031	0.370714	0.743618	0.726144	1.02897	1.01433	0.304367	0.304367	0.551665	0.408278	0.695633	0.683016	0.743915	0.41929	0.591914	0.723647	0.651811	0.764778	0.601253	0.398747	0.235222	0.276353	0.348189	3.12	0.999338	1923.76	2080.18	794.34	639.8	1197.56
JAC	Jaccard without IOI	JACnIOI	-1	ü		70	0.375439	0.366018	0.370697	0.743602	0.726237	1.02904	1.01437	0.304379	0.304379	0.551675	0.408223	0.695621	0.683009	0.7439	0.419289	0.591896	0.723646	0.651793	0.76475	0.601269	0.398731	0.23525	0.276354	0.348207	3.12	0.999338	1923.5	2080.1	794.32	639.88	1197.58
JAC	Jaccard without IOI	JACnIOI	-1	ü		72	0.375146	0.365815	0.37045	0.743434	0.726513	1.02964	1.01466	0.304515	0.304515	0.551797	0.408113	0.695485	0.682907	0.743727	0.419305	0.591685	0.723621	0.651525	0.764419	0.601396	0.398604	0.235581	0.276379	0.348475	3.12	0.999338	1922.98	2079.2	794.06	640.78	1197.84
JAC	Jaccard without IOI	JACnIOI	-1	ü		74	0.374954	0.365691	0.370292	0.743322	0.726657	1.03002	1.01485	0.304604	0.304604	0.551877	0.408032	0.695396	0.682846	0.743612	0.419309	0.591543	0.723613	0.651341	0.764192	0.601499	0.398501	0.235808	0.276387	0.348659	3.12	0.999338	1922.6	2078.58	793.86	641.4	1198.04
JAC	Jaccard without IOI	JACnIOI	-1	ü		73	0.374903	0.365612	0.370227	0.743319	0.726717	1.03003	1.01485	0.30463	0.30463	0.5519	0.407998	0.69537	0.682806	0.74361	0.41934	0.591539	0.723562	0.651341	0.764242	0.60137	0.39863	0.235758	0.276438	0.348659	3.12	0.999338	1922.44	2078.72	794.12	641.26	1197.78
JAC	Jaccard without IOI	JACnIOI	-1	ü		75	0.374441	0.365245	0.369814	0.743086	0.726801	1.03032	1.015	0.304846	0.304846	0.552097	0.407952	0.695154	0.682623	0.743373	0.419394	0.591242	0.723474	0.650967	0.763847	0.601398	0.398602	0.236153	0.276526	0.349033	3.12	0.999338	1922.22	2077.64	794.06	642.34	1197.84
JAC	Jaccard without IOI	JACnIOI	-1	ü		16	0.374412	0.365182	0.369767	0.743072	0.72858	1.03748	1.01852	0.304868	0.304868	0.552119	0.408703	0.695132	0.682591	0.743362	0.419416	0.591224	0.723443	0.650969	0.763861	0.601322	0.398678	0.236139	0.276557	0.349031	3.12	0.999338	1925.76	2077.68	794.2	642.3	1197.7
JAC	Jaccard without IOI	JACnIOI	-1	ü		76	0.374116	0.36498	0.369518	0.742921	0.727133	1.03075	1.01521	0.304999	0.304999	0.552236	0.407667	0.695001	0.68249	0.743205	0.419436	0.591033	0.723406	0.65071	0.763574	0.601406	0.398594	0.236426	0.276594	0.34929	3.12	0.999338	1920.88	2076.9	794.04	643.08	1197.86
JAC	Jaccard without IOI	JACnIOI	-1	ü		77	0.373925	0.364816	0.369341	0.742828	0.727264	1.03079	1.01523	0.305092	0.305092	0.552321	0.407514	0.694908	0.682408	0.743112	0.419466	0.590916	0.723356	0.650569	0.763437	0.601379	0.398621	0.236563	0.276644	0.349431	3.12	0.999338	1920.16	2076.52	794.1	643.46	1197.8
JAC	Jaccard without IOI	JACnIOI	-1	ü		79	0.374013	0.364991	0.369473	0.742813	0.727281	1.03093	1.0153	0.305046	0.305046	0.552278	0.40754	0.694954	0.682495	0.743092	0.419384	0.590896	0.72349	0.650523	0.763253	0.601738	0.398262	0.236747	0.27651	0.349477	3.12	0.999338	1920.28	2076.02	793.38	643.96	1198.52
JAC	Jaccard without IOI	JACnIOI	-1	ü		78	0.37383	0.364783	0.369278	0.742755	0.727404	1.03118	1.01542	0.305135	0.305135	0.552358	0.407485	0.694865	0.682392	0.743036	0.419448	0.590825	0.723384	0.650446	0.763251	0.601532	0.398468	0.236749	0.276616	0.349554	3.12	0.999338	1920.02	2076.02	793.8	643.96	1198.1
JAC	Jaccard without IOI	JACnIOI	-1	ü		80	0.373859	0.364904	0.369353	0.742711	0.727336	1.03105	1.01536	0.305118	0.305118	0.552344	0.407531	0.694882	0.682452	0.742987	0.419379	0.590767	0.723501	0.650358	0.763027	0.601877	0.398123	0.236973	0.276499	0.349642	3.12	0.999338	1920.24	2075.4	793.1	644.58	1198.8
JAC	Jaccard without IOI	JACnIOI	65535	ü	ü	82	0.373756	0.3612	0.367423	0.744751	0.72827	1.04179	1.02063	0.305326	0.305326	0.55253	0.410133	0.694674	0.6806	0.745219	0.421741	0.593354	0.719607	0.654149	0.771769	0.589431	0.410569	0.228231	0.280393	0.345851	3.12	0.999338	1932.5	2099.2	817.88	620.78	1174.02
JAC	Jaccard without IOI	JACnIOI	-1	ü		82	0.373297	0.36429	0.368765	0.742524	0.727684	1.03167	1.01566	0.305385	0.305385	0.552585	0.407277	0.694615	0.682145	0.742803	0.419556	0.590533	0.723208	0.650089	0.762956	0.601334	0.398666	0.237044	0.276792	0.349911	3.12	0.999338	1919.04	2075.22	794.18	644.76	1197.72
JAC	Jaccard without IOI	JACnIOI	-1	ü		81	0.37328	0.364304	0.368763	0.742499	0.727625	1.03156	1.01561	0.305394	0.305394	0.552592	0.407315	0.694606	0.682152	0.742776	0.419541	0.590501	0.723232	0.650048	0.762876	0.601428	0.398572	0.237124	0.276768	0.349952	3.12	0.999338	1919.22	2075	794	644.98	1197.9
JAC	Jaccard without IOI	JACnIOI	-1	ü		83	0.373166	0.364222	0.368666	0.742435	0.727905	1.032	1.01583	0.305445	0.305445	0.552639	0.407115	0.694555	0.682111	0.74271	0.419547	0.590419	0.723224	0.649942	0.762748	0.601474	0.398526	0.237252	0.276776	0.350058	3.12	0.999338	1918.28	2074.66	793.9	645.32	1198
JAC	Jaccard without IOI	JACnIOI	-1	ü		86	0.373026	0.364141	0.368556	0.742341	0.727901	1.0323	1.01597	0.305513	0.305513	0.552701	0.407222	0.694487	0.682071	0.742614	0.419544	0.5903	0.72323	0.649796	0.762545	0.601597	0.398403	0.237455	0.27677	0.350204	3.12	0.999338	1918.78	2074.1	793.66	645.88	1198.24
JAC	Jaccard without IOI	JACnIOI	-1	ü		88	0.372903	0.364029	0.368438	0.742286	0.727914	1.03227	1.01596	0.305572	0.305572	0.552755	0.407213	0.694428	0.682015	0.742559	0.419567	0.590231	0.723192	0.649711	0.762473	0.601556	0.398444	0.237527	0.276808	0.350289	3.12	0.999338	1918.74	2073.9	793.74	646.08	1198.16
JAC	Jaccard without IOI	JACnIOI	-1	ü		87	0.372848	0.363975	0.368384	0.742265	0.728062	1.03263	1.01613	0.305598	0.305598	0.552778	0.407132	0.694402	0.681987	0.742538	0.41958	0.590203	0.723171	0.649677	0.762451	0.601524	0.398476	0.237549	0.276829	0.350323	3.12	0.999338	1918.36	2073.84	793.8	646.14	1198.1
JAC	Jaccard without IOI	JACnIOI	-1	ü		84	0.372773	0.363899	0.368308	0.74224	0.728122	1.0325	1.01607	0.305632	0.305632	0.552809	0.407047	0.694368	0.68195	0.742513	0.419601	0.590172	0.723137	0.649636	0.762435	0.601464	0.398536	0.237565	0.276863	0.350364	3.12	0.999338	1917.96	2073.8	793.92	646.18	1197.98
JAC	Jaccard without IOI	JACnIOI	-1	ü		89	0.372877	0.364062	0.368442	0.742239	0.728096	1.03265	1.01614	0.305585	0.305585	0.552766	0.40709	0.694415	0.682031	0.74251	0.419532	0.59017	0.723248	0.649629	0.762314	0.601749	0.398251	0.237686	0.276752	0.350371	3.12	0.999338	1918.16	2073.46	793.36	646.52	1198.54
JAC	Jaccard without IOI	JACnIOI	-1	ü		85	0.372666	0.363791	0.368201	0.742199	0.728134	1.03272	1.01618	0.305683	0.305683	0.552855	0.40709	0.694317	0.681895	0.742471	0.419629	0.590119	0.72309	0.649576	0.762398	0.601393	0.398607	0.237602	0.27691	0.350424	3.12	0.999338	1918.16	2073.7	794.06	646.28	1197.84
JAC	Jaccard without IOI	JACnIOI	-1	ü		90	0.372757	0.363981	0.368342	0.742168	0.728164	1.03291	1.01627	0.30564	0.30564	0.552816	0.407056	0.69436	0.681991	0.742437	0.419536	0.590081	0.723244	0.649512	0.762168	0.601814	0.398186	0.237832	0.276756	0.350488	3.12	0.999338	1918	2073.06	793.22	646.92	1198.68
JAC	Jaccard without IOI	JACnIOI	-1	ü		15	0.371989	0.362754	0.367341	0.742138	0.729989	1.04038	1.01995	0.306022	0.306022	0.553163	0.407952	0.693978	0.681377	0.74243	0.420037	0.590045	0.722419	0.64957	0.763026	0.599729	0.400271	0.236974	0.277581	0.35043	3.12	0.999338	1922.22	2075.42	797.38	644.56	1194.52
JAC	Jaccard without IOI	JACnIOI	-1	ü		92	0.372731	0.364026	0.368352	0.742117	0.728351	1.03301	1.01632	0.305649	0.305649	0.552823	0.406827	0.694351	0.682013	0.742382	0.419494	0.590016	0.723311	0.64942	0.761982	0.602044	0.397956	0.238018	0.276689	0.35058	3.12	0.999338	1916.92	2072.56	792.76	647.42	1199.14
JAC	Jaccard without IOI	JACnIOI	-1	ü		91	0.372539	0.363767	0.368126	0.742087	0.728245	1.03298	1.01631	0.305742	0.305742	0.552908	0.406963	0.694258	0.681883	0.742355	0.41959	0.589978	0.723154	0.649385	0.762094	0.601673	0.398327	0.237906	0.276846	0.350615	3.12	0.999338	1917.56	2072.86	793.5	647.12	1198.4
JAC	Jaccard without IOI	JACnIOI	-1	ü		96	0.372481	0.363846	0.368137	0.741974	0.728669	1.03365	1.01663	0.305767	0.305767	0.552931	0.406661	0.694233	0.681923	0.742236	0.419511	0.589836	0.723281	0.6492	0.761714	0.602132	0.397868	0.238286	0.276719	0.3508	3.12	0.999338	1916.14	2071.84	792.6	648.14	1199.3
JAC	Jaccard without IOI	JACnIOI	-1	ü		94	0.372359	0.363672	0.367989	0.74196	0.728597	1.03366	1.01664	0.305827	0.305827	0.552984	0.406729	0.694173	0.681836	0.742224	0.419576	0.589819	0.723175	0.649184	0.761804	0.601868	0.398132	0.238196	0.276825	0.350816	3.12	0.999338	1916.46	2072.08	793.12	647.9	1198.78
JAC	Jaccard without IOI	JACnIOI	-1	ü		93	0.372349	0.363677	0.367986	0.741944	0.728491	1.03341	1.01652	0.305831	0.305831	0.552988	0.40678	0.694169	0.681838	0.742207	0.419569	0.589798	0.723189	0.649161	0.761753	0.601924	0.398076	0.238247	0.276811	0.350839	3.12	0.999338	1916.7	2071.94	793	648.04	1198.9
JAC	Jaccard without IOI	JACnIOI	-1	ü		97	0.372301	0.363675	0.367962	0.741898	0.728559	1.03358	1.0166	0.305852	0.305852	0.553008	0.406742	0.694148	0.681837	0.742159	0.419551	0.58974	0.723217	0.649085	0.761625	0.60205	0.39795	0.238375	0.276783	0.350915	3.12	0.999338	1916.52	2071.6	792.76	648.38	1199.14
JAC	Jaccard without IOI	JACnIOI	-1	ü		98	0.372235	0.363643	0.367913	0.741853	0.728622	1.03384	1.01673	0.305882	0.305882	0.553035	0.40675	0.694118	0.681822	0.742113	0.419543	0.589683	0.72323	0.649005	0.761516	0.602127	0.397873	0.238484	0.27677	0.350995	3.12	0.999338	1916.56	2071.3	792.6	648.68	1199.3
JAC	Jaccard without IOI	JACnIOI	-1	ü		95	0.372134	0.36348	0.36778	0.74185	0.728707	1.0337	1.01666	0.305933	0.305933	0.55308	0.40661	0.694067	0.68174	0.742113	0.41961	0.58968	0.72312	0.649014	0.761634	0.601847	0.398153	0.238366	0.27688	0.350986	3.12	0.999338	1915.9	2071.62	793.16	648.36	1198.74
JAC	Jaccard without IOI	JACnIOI	-1	ü		99	0.372008	0.363463	0.367709	0.74173	0.728788	1.03407	1.01684	0.305992	0.305992	0.553135	0.406653	0.694008	0.681731	0.741988	0.419568	0.589527	0.723189	0.648819	0.761304	0.602159	0.397841	0.238696	0.276811	0.351181	3.12	0.999338	1916.1	2070.72	792.54	649.26	1199.36
MRC	Median-Based Robust without IOI	MRCnIOI	65535	ü	ü	9	0.373877	0.361505	0.367637	0.744677	0.741676	1.09051	1.04421	0.305256	0.305256	0.552476	0.409131	0.694744	0.680753	0.745133	0.421584	0.593251	0.719884	0.653993	0.771297	0.590208	0.409792	0.228703	0.280116	0.346007	3.16	0.99933	1927.76	2097.9	816.26	622.06	1175.62
JAC	Jaccard without IOI	JACnIOI	-1	ü		100	0.3718	0.363337	0.367543	0.741595	0.728818	1.03406	1.01684	0.30609	0.30609	0.553222	0.406606	0.69391	0.681669	0.741849	0.419564	0.589358	0.723197	0.648603	0.76101	0.602327	0.397673	0.23899	0.276803	0.351397	3.12	0.999338	1915.88	2069.92	792.2	650.06	1199.7
JAC	Jaccard without IOI	JACnIOI	-1	ü		14	0.37	0.361046	0.365494	0.741186	0.731186	1.04268	1.02107	0.306964	0.306964	0.55401	0.407239	0.693036	0.680523	0.741466	0.420346	0.588845	0.721909	0.648091	0.761583	0.599463	0.400537	0.238417	0.278091	0.351909	3.12	0.999338	1918.86	2071.5	797.9	648.48	1194
JAC	Jaccard without IOI	JACnIOI	-1	ü		13	0.369766	0.361096	0.365404	0.740908	0.732052	1.04376	1.0216	0.307066	0.307066	0.554104	0.406479	0.692934	0.680548	0.741174	0.420204	0.588493	0.722146	0.64762	0.760734	0.600362	0.399638	0.239266	0.277854	0.35238	3.12	0.999338	1915.28	2069.2	796.08	650.78	1195.82
JAC	Jaccard without IOI	JACnIOI	65535	ü	ü	83	0.37363	0.361169	0.367345	0.74465	0.728338	1.04179	1.02063	0.305381	0.305381	0.552579	0.41004	0.694619	0.680584	0.745114	0.421713	0.593228	0.719652	0.653979	0.771503	0.589665	0.410335	0.228497	0.280348	0.346021	3.12	0.999338	1932.06	2098.48	817.42	621.5	1174.48
JAC	Jaccard without IOI	JACnIOI	-1	ü		12	0.368159	0.359703	0.363905	0.740156	0.733605	1.04676	1.02307	0.30783	0.30783	0.554786	0.405409	0.69217	0.679851	0.740413	0.420469	0.587551	0.721701	0.646458	0.759641	0.600062	0.399938	0.240359	0.278299	0.353542	3.12	0.999338	1910.24	2066.22	796.7	653.76	1195.2
JAC	Jaccard without IOI	JACnIOI	-1	ü		11	0.365475	0.357553	0.361491	0.73873	0.736284	1.05268	1.02596	0.309116	0.309116	0.555943	0.404128	0.690884	0.678777	0.738965	0.42078	0.585761	0.721187	0.644287	0.757213	0.60034	0.39966	0.242787	0.278813	0.355713	3.12	0.999338	1904.2	2059.62	796.16	660.36	1195.74
JAC	Jaccard without IOI	JACnIOI	65535	ü	ü	84	0.373523	0.361096	0.367256	0.744587	0.728329	1.04174	1.02061	0.305432	0.305432	0.552626	0.410027	0.694568	0.680548	0.745049	0.421719	0.593148	0.719642	0.653881	0.771379	0.589717	0.410283	0.228621	0.280358	0.346119	3.12	0.999338	1932	2098.14	817.32	621.84	1174.58
JAC	Jaccard without IOI	JACnIOI	-1	ü		0	0.365944	0.359569	0.362742	0.737862	0.735214	1.04418	1.0218	0.308887	0.308887	0.555746	0.401988	0.691113	0.679785	0.738027	0.419574	0.584654	0.723182	0.642762	0.753202	0.606367	0.393633	0.246798	0.276818	0.357238	3.12	0.999338	1894.12	2048.68	784.14	671.3	1207.76
JAC	Jaccard without IOI	JACnIOI	-1	ü		10	0.362275	0.354552	0.358392	0.737367	0.738936	1.05917	1.02911	0.31064	0.31064	0.557314	0.403198	0.68936	0.677276	0.737596	0.42146	0.584046	0.720062	0.642214	0.755587	0.598965	0.401035	0.244413	0.279938	0.357786	3.12	0.999338	1899.82	2055.2	798.92	664.78	1192.98
JAC	Jaccard without IOI	JACnIOI	-1	ü		9	0.36081	0.35356	0.357166	0.736468	0.741207	1.06545	1.03215	0.311345	0.311345	0.557947	0.402438	0.688655	0.67678	0.736678	0.421499	0.582917	0.719989	0.640821	0.753786	0.599774	0.400226	0.246214	0.280011	0.359179	3.12	0.999338	1896.24	2050.3	797.34	669.68	1194.56
JAC	Jaccard without IOI	JACnIOI	-1	ü		8	0.357785	0.350628	0.354187	0.735207	0.745219	1.07594	1.03722	0.312788	0.312788	0.55924	0.400935	0.687212	0.675314	0.735413	0.422196	0.581342	0.718835	0.63895	0.752403	0.598226	0.401774	0.247597	0.281165	0.36105	3.12	0.999338	1889.16	2046.58	800.42	673.4	1191.48
MRC	Median-Based Robust without IOI	MRCnIOI	65535	ü	ü	43	0.377294	0.367587	0.372408	0.744506	0.739134	1.09432	1.04602	0.303486	0.303486	0.550864	0.411347	0.696514	0.683794	0.744814	0.418998	0.593039	0.724132	0.653162	0.766111	0.601476	0.398524	0.233889	0.275868	0.346838	3.16	0.99933	1938.2	2083.8	793.82	636.16	1198.06
JAC	Jaccard without IOI	JACnIOI	-1	ü		7	0.352664	0.346144	0.349387	0.732725	0.750163	1.08836	1.04319	0.31525	0.31525	0.561445	0.398983	0.68475	0.673072	0.732906	0.423041	0.578232	0.717451	0.635213	0.748725	0.59742	0.40258	0.251275	0.282549	0.364787	3.12	0.999338	1879.96	2036.54	801.98	683.44	1189.92
JAC	Jaccard without IOI	JACnIOI	-1	ü		6	0.348145	0.342313	0.345216	0.730395	0.756034	1.10306	1.05022	0.31744	0.31744	0.563392	0.396916	0.68256	0.671157	0.730549	0.423694	0.575338	0.716365	0.63178	0.74504	0.597274	0.402726	0.25496	0.283635	0.36822	3.12	0.999338	1870.22	2026.52	802.28	693.46	1189.62
JAC	Jaccard without IOI	JACnIOI	65535	ü	ü	89	0.373439	0.361156	0.367245	0.744482	0.72855	1.04191	1.02069	0.305462	0.305462	0.552651	0.409811	0.694538	0.680578	0.744936	0.421651	0.593017	0.719753	0.653686	0.771027	0.59013	0.40987	0.228973	0.280247	0.346314	3.12	0.999338	1930.98	2097.18	816.5	622.8	1175.4
JAC	Jaccard without IOI	JACnIOI	-1	ü		5	0.343145	0.338343	0.340735	0.727492	0.765105	1.12711	1.06161	0.319919	0.319919	0.565584	0.393546	0.680081	0.669172	0.727611	0.424182	0.571748	0.715546	0.627599	0.739914	0.59843	0.40157	0.260086	0.284454	0.372401	3.12	0.999338	1854.34	2012.56	800	707.42	1191.9
JAC	Jaccard without IOI	JACnIOI	-1	ü		4	0.331605	0.327524	0.329556	0.722208	0.779629	1.16471	1.07916	0.325539	0.325539	0.57053	0.387985	0.674461	0.663762	0.722309	0.426536	0.565245	0.711611	0.619993	0.733207	0.594317	0.405683	0.266793	0.288389	0.380007	3.12	0.999338	1828.14	1994.28	808.2	725.7	1183.7
JAC	Jaccard without IOI	JACnIOI	65535	ü	ü	85	0.37329	0.360919	0.367051	0.744474	0.728486	1.04196	1.02071	0.305538	0.305538	0.552721	0.409909	0.694462	0.680459	0.744933	0.421742	0.593003	0.719603	0.653688	0.771182	0.589737	0.410263	0.228818	0.280397	0.346312	3.12	0.999338	1931.44	2097.6	817.28	622.38	1174.62
JAC	Jaccard without IOI	JACnIOI	-1	ü		3	0.314114	0.310774	0.312438	0.714431	0.801646	1.22204	1.10539	0.334045	0.334045	0.577937	0.379377	0.665955	0.655387	0.714511	0.430339	0.555775	0.705201	0.608912	0.723983	0.586792	0.413208	0.276017	0.294799	0.391088	3.12	0.999338	1787.58	1969.18	823.18	750.8	1168.72
JAC	Jaccard without IOI	JACnIOI	65535	ü	ü	86	0.373243	0.360894	0.367015	0.744443	0.728626	1.04234	1.0209	0.305559	0.305559	0.552741	0.409883	0.694441	0.680447	0.744901	0.421741	0.592965	0.719605	0.653638	0.771114	0.589779	0.410221	0.228886	0.280395	0.346362	3.12	0.999338	1931.32	2097.42	817.2	622.56	1174.7
JAC	Jaccard without IOI	JACnIOI	-1	ü		2	0.287838	0.28573	0.286781	0.702238	0.842042	1.33599	1.15578	0.346949	0.346949	0.588999	0.36661	0.653051	0.642865	0.702284	0.43585	0.541158	0.695796	0.592041	0.708865	0.576866	0.423134	0.291135	0.304204	0.407959	3.12	0.999338	1727.42	1928.1	842.9	791.88	1149
JAC	Jaccard without IOI	JACnIOI	65535	ü	ü	87	0.373245	0.360905	0.367022	0.744435	0.728541	1.04206	1.02076	0.305559	0.305559	0.55274	0.409883	0.694441	0.680452	0.744892	0.421735	0.592956	0.719614	0.653631	0.771085	0.58982	0.41018	0.228915	0.280386	0.346369	3.12	0.999338	1931.32	2097.34	817.12	622.64	1174.78
JAC	Jaccard without IOI	JACnIOI	-1	ü		1	0.239505	0.238387	0.238944	0.680867	0.945474	1.6496	1.28431	0.370646	0.370646	0.608785	0.337967	0.629354	0.619194	0.680901	0.446722	0.516185	0.676821	0.562683	0.685048	0.553339	0.446661	0.314952	0.323179	0.437317	3.12	0.999338	1592.46	1863.28	889.74	856.7	1102.16
PCC	Standard Pearson	PCC	65535		ü	18	0.405953	0.391591	0.398706	0.757762	0.710562	1.02072	1.01025	0.290207	0.290207	0.538679	0.424255	0.709793	0.695796	0.758278	0.414693	0.610033	0.731154	0.674799	0.786433	0.605158	0.394842	0.213567	0.268846	0.325201	3.12	0.999338	1999.04	2139.06	786.5	580.92	1205.4
PCC	Standard Pearson	PCC	65535		ü	19	0.405418	0.391101	0.398194	0.757539	0.710799	1.02127	1.01052	0.290453	0.290453	0.538902	0.424026	0.709547	0.69555	0.758052	0.4148	0.609751	0.730977	0.674442	0.786155	0.604946	0.395054	0.213845	0.269023	0.325558	3.12	0.999338	1997.96	2138.32	786.92	581.66	1204.98
PCC	Standard Pearson	PCC	65535		ü	24	0.405723	0.391738	0.398668	0.757508	0.70939	1.02089	1.01033	0.290279	0.290279	0.538741	0.425414	0.709721	0.695869	0.758002	0.414514	0.60971	0.731441	0.674282	0.785554	0.606184	0.393816	0.214446	0.268559	0.325718	3.12	0.999338	2004.5	2136.68	784.46	583.3	1207.44
PCC	Standard Pearson	PCC	65535		ü	17	0.40521	0.390809	0.397943	0.757495	0.711674	1.02322	1.01149	0.290564	0.290564	0.539009	0.423695	0.709436	0.695404	0.758013	0.414909	0.609689	0.730803	0.674406	0.786261	0.604548	0.395452	0.213739	0.269197	0.325594	3.12	0.999338	1996.4	2138.6	787.72	581.38	1204.18
PCC	Standard Pearson	PCC	65535		ü	29	0.405286	0.391595	0.398381	0.757211	0.710061	1.02386	1.01179	0.290457	0.290457	0.5389	0.42527	0.709543	0.695798	0.757689	0.414441	0.609333	0.731553	0.673734	0.784783	0.606812	0.393188	0.215217	0.268447	0.326266	3.12	0.999338	2003.82	2134.6	783.22	585.38	1208.68
PCC	Standard Pearson	PCC	65535		ü	22	0.404841	0.390802	0.397758	0.757194	0.710061	1.02051	1.01014	0.290699	0.290699	0.539132	0.424646	0.709301	0.695401	0.757692	0.414771	0.609303	0.731028	0.673813	0.785352	0.60545	0.39455	0.214648	0.268972	0.326187	3.12	0.999338	2000.88	2136.14	785.9	583.84	1206
PCC	Standard Pearson	PCC	65535		ü	26	0.405064	0.391226	0.398083	0.757191	0.709776	1.02263	1.01118	0.29058	0.29058	0.539017	0.425384	0.70942	0.695613	0.75768	0.414586	0.609304	0.731316	0.673749	0.785022	0.606204	0.393796	0.214978	0.268684	0.326251	3.12	0.999338	2004.36	2135.24	784.44	584.74	1207.46
PCC	Standard Pearson	PCC	65535		ü	16	0.404458	0.390196	0.397262	0.757154	0.712497	1.0248	1.01226	0.290907	0.290907	0.539326	0.423313	0.709093	0.695098	0.757667	0.415019	0.609248	0.730628	0.67383	0.78573	0.604466	0.395534	0.21427	0.269372	0.32617	3.12	0.999338	1994.6	2137.14	787.88	582.84	1204.02
PCC	Standard Pearson	PCC	65535		ü	30	0.40515	0.391497	0.398264	0.757132	0.710506	1.02456	1.01214	0.290521	0.290521	0.53896	0.424934	0.709479	0.695749	0.757608	0.414447	0.609232	0.731544	0.673606	0.784627	0.606871	0.393129	0.215373	0.268456	0.326394	3.12	0.999338	2002.24	2134.18	783.1	585.8	1208.8
PCC	Standard Pearson	PCC	65535		ü	15	0.404242	0.389866	0.396987	0.757112	0.712977	1.02583	1.01277	0.291022	0.291022	0.539432	0.42327	0.708978	0.694933	0.757631	0.415137	0.609194	0.730435	0.673807	0.785865	0.604	0.396	0.214135	0.269565	0.326193	3.12	0.999338	1994.4	2137.52	788.8	582.46	1203.1
PCC	Standard Pearson	PCC	65535		ü	28	0.404953	0.391271	0.398052	0.757089	0.710124	1.02349	1.01161	0.290614	0.290614	0.539049	0.425108	0.709386	0.695636	0.757568	0.414522	0.609171	0.73142	0.673533	0.784675	0.606596	0.393404	0.215325	0.26858	0.326467	3.12	0.999338	2003.06	2134.3	783.66	585.68	1208.24
PCC	Standard Pearson	PCC	65535		ü	23	0.40463	0.39069	0.397598	0.757074	0.709823	1.02058	1.01017	0.290793	0.290793	0.539217	0.424956	0.709207	0.695345	0.757568	0.414769	0.60915	0.731028	0.673602	0.785096	0.605594	0.394406	0.214904	0.268972	0.326398	3.12	0.999338	2002.34	2135.44	785.64	584.54	1206.26
PCC	Standard Pearson	PCC	65535		ü	25	0.404707	0.390832	0.397708	0.757068	0.71018	1.02264	1.01119	0.290755	0.290755	0.53918	0.424896	0.709245	0.695416	0.757558	0.414706	0.609144	0.731127	0.67358	0.784972	0.60586	0.39414	0.215028	0.268873	0.32642	3.12	0.999338	2002.06	2135.1	785.12	584.88	1206.78
PCC	Standard Pearson	PCC	65535		ü	31	0.404748	0.391037	0.397832	0.757004	0.710939	1.02573	1.01272	0.29072	0.29072	0.539143	0.424752	0.70928	0.695519	0.757485	0.414587	0.609067	0.731316	0.673432	0.784616	0.606421	0.393579	0.215384	0.268684	0.326568	3.12	0.999338	2001.38	2134.14	784	585.84	1207.9
PCC	Standard Pearson	PCC	65535		ü	21	0.404164	0.390036	0.397036	0.756979	0.710574	1.02104	1.0104	0.29103	0.29103	0.539439	0.424081	0.70897	0.695018	0.757483	0.415005	0.609023	0.73065	0.673514	0.785325	0.604711	0.395289	0.214675	0.26935	0.326486	3.12	0.999338	1998.22	2136.06	787.38	583.92	1204.52
PCC	Standard Pearson	PCC	65535		ü	20	0.404156	0.390031	0.39703	0.756976	0.710676	1.02071	1.01024	0.291035	0.291035	0.539441	0.423852	0.708965	0.695016	0.757481	0.415004	0.609023	0.730644	0.673513	0.785328	0.604703	0.395297	0.214672	0.269356	0.326487	3.12	0.999338	1997.14	2136.08	787.42	583.9	1204.48
PCC	Standard Pearson	PCC	65535		ü	27	0.4045	0.390686	0.397532	0.75697	0.71018	1.0239	1.01181	0.290844	0.290844	0.539262	0.425214	0.709156	0.695343	0.757457	0.41472	0.609018	0.731099	0.673401	0.78479	0.605896	0.394104	0.21521	0.268901	0.326599	3.12	0.999338	2003.56	2134.62	785.06	585.36	1206.84
PCC	Standard Pearson	PCC	65535		ü	32	0.404578	0.390886	0.397672	0.756927	0.711118	1.02596	1.01283	0.290801	0.290801	0.539217	0.424616	0.709199	0.695443	0.757408	0.414617	0.60897	0.731265	0.673313	0.784512	0.606374	0.393626	0.215488	0.268735	0.326687	3.12	0.999338	2000.74	2133.86	784.1	586.12	1207.8
PCC	Standard Pearson	PCC	65535		ü	33	0.40421	0.390564	0.397327	0.756775	0.711682	1.02777	1.01372	0.290971	0.290971	0.539373	0.42437	0.709029	0.695282	0.757254	0.414686	0.608772	0.731155	0.673056	0.784312	0.606253	0.393747	0.215688	0.268845	0.326944	3.12	0.999338	1999.58	2133.3	784.34	586.68	1207.56
PCC	Standard Pearson	PCC	65535		ü	34	0.404185	0.39056	0.397313	0.75676	0.711903	1.02866	1.01416	0.290979	0.290979	0.539387	0.42434	0.709021	0.69528	0.757237	0.414682	0.608747	0.731164	0.67302	0.784266	0.606294	0.393706	0.215734	0.268836	0.32698	3.12	0.999338	1999.44	2133.18	784.26	586.8	1207.64
PCC	Standard Pearson	PCC	65535		ü	35	0.403943	0.390399	0.397112	0.756638	0.71223	1.03035	1.015	0.291086	0.291086	0.539484	0.424429	0.708914	0.695199	0.757112	0.414694	0.608591	0.731141	0.672802	0.784031	0.606368	0.393632	0.215969	0.268859	0.327198	3.12	0.999338	1999.86	2132.54	784.12	587.44	1207.78
PCC	Standard Pearson	PCC	65535		ü	36	0.403818	0.390304	0.397002	0.756578	0.712535	1.03112	1.01537	0.291141	0.291141	0.539535	0.42423	0.708859	0.695152	0.75705	0.414706	0.608513	0.73112	0.672698	0.783925	0.606379	0.393621	0.216075	0.26888	0.327302	3.12	0.999338	1998.92	2132.26	784.1	587.72	1207.8
PCC	Standard Pearson	PCC	65535		ü	14	0.402751	0.388465	0.395542	0.756508	0.714309	1.02768	1.01369	0.291722	0.291722	0.540081	0.422167	0.708278	0.694232	0.757025	0.415459	0.608412	0.729911	0.67284	0.785174	0.60329	0.39671	0.214826	0.270089	0.32716	3.12	0.999338	1989.2	2135.64	790.22	584.34	1201.68
PCC	Standard Pearson	PCC	65535		ü	12	0.402699	0.388516	0.395543	0.756448	0.715162	1.03044	1.01505	0.291735	0.291735	0.540094	0.422023	0.708265	0.694258	0.756959	0.415411	0.608334	0.729989	0.67271	0.784953	0.603563	0.396437	0.215047	0.270011	0.32729	3.12	0.999338	1988.52	2135.04	789.68	584.94	1202.22
PCC	Standard Pearson	PCC	65535		ü	13	0.402495	0.388304	0.395334	0.75637	0.714568	1.0279	1.01379	0.291833	0.291833	0.540185	0.422069	0.708167	0.694152	0.756882	0.415463	0.608234	0.729901	0.672593	0.784889	0.603415	0.396585	0.215111	0.270099	0.327407	3.12	0.999338	1988.74	2134.88	789.98	585.1	1201.92
PCC	Standard Pearson	PCC	65535		ü	37	0.403147	0.389754	0.396393	0.756266	0.712773	1.03155	1.01558	0.291446	0.291446	0.539819	0.42417	0.708554	0.694877	0.756732	0.414798	0.60811	0.73097	0.672176	0.783426	0.606328	0.393672	0.216574	0.26903	0.327824	3.12	0.999338	1998.64	2130.92	784.2	589.06	1207.7
PCC	Standard Pearson	PCC	65535		ü	10	0.401386	0.38666	0.393952	0.756179	0.718291	1.0388	1.01915	0.29241	0.29241	0.540712	0.420966	0.70759	0.69333	0.756722	0.416077	0.607994	0.728902	0.672484	0.78563	0.60103	0.39897	0.21437	0.271098	0.327516	3.12	0.999338	1983.54	2136.9	794.72	583.08	1197.18
PCC	Standard Pearson	PCC	65535		ü	38	0.403003	0.389762	0.396326	0.756149	0.713223	1.03249	1.01604	0.291502	0.291502	0.539872	0.42386	0.708498	0.694881	0.756608	0.414743	0.607957	0.731063	0.67194	0.783071	0.60669	0.39331	0.216929	0.268937	0.32806	3.12	0.999338	1997.18	2129.94	783.48	590.04	1208.42
PCC	Standard Pearson	PCC	65535		ü	11	0.401568	0.387284	0.394359	0.756071	0.717179	1.03461	1.0171	0.292274	0.292274	0.540595	0.420834	0.707726	0.693642	0.756588	0.415763	0.607844	0.72942	0.672148	0.784793	0.602491	0.397509	0.215207	0.27058	0.327852	3.12	0.999338	1982.92	2134.62	791.8	585.36	1200.1
PCC	Standard Pearson	PCC	65535		ü	39	0.402732	0.38953	0.396074	0.756028	0.71344	1.03323	1.0164	0.291629	0.291629	0.539988	0.42375	0.708371	0.694765	0.756486	0.414784	0.607801	0.730992	0.67174	0.782897	0.606633	0.393367	0.217103	0.269008	0.32826	3.12	0.999338	1996.66	2129.46	783.6	590.52	1208.3
PCC	Standard Pearson	PCC	65535		ü	44	0.402926	0.390014	0.396416	0.755979	0.714055	1.03732	1.01842	0.29151	0.29151	0.539875	0.423932	0.70849	0.695007	0.756422	0.41455	0.60774	0.731367	0.671559	0.782363	0.607652	0.392348	0.217637	0.268633	0.328441	3.12	0.999338	1997.52	2128	781.58	591.98	1210.32
PCC	Standard Pearson	PCC	65535		ü	41	0.402761	0.389754	0.396203	0.755951	0.713894	1.03488	1.01722	0.291599	0.291599	0.539962	0.423572	0.708401	0.694877	0.756399	0.414652	0.6077	0.731208	0.671554	0.782487	0.607267	0.392733	0.217513	0.268792	0.328446	3.12	0.999338	1995.82	2128.34	782.34	591.64	1209.56
PCC	Standard Pearson	PCC	65535		ü	40	0.402639	0.389567	0.396048	0.755933	0.713877	1.03445	1.01701	0.291663	0.291663	0.540021	0.423529	0.708337	0.694784	0.756385	0.414725	0.607677	0.73109	0.67155	0.782583	0.606984	0.393016	0.217417	0.26891	0.32845	3.12	0.999338	1995.62	2128.6	782.9	591.38	1209
PCC	Standard Pearson	PCC	65535		ü	42	0.402673	0.389694	0.396129	0.75591	0.714123	1.03578	1.01766	0.291637	0.291637	0.539995	0.423461	0.708363	0.694847	0.756357	0.414655	0.607649	0.731196	0.671476	0.782411	0.607283	0.392717	0.217589	0.268804	0.328524	3.12	0.999338	1995.3	2128.14	782.32	591.84	1209.58
PCC	Standard Pearson	PCC	65535		ü	43	0.40255	0.389638	0.39604	0.755827	0.714327	1.03713	1.01832	0.291693	0.291693	0.540045	0.423631	0.708307	0.694819	0.75627	0.414643	0.607543	0.731215	0.671335	0.782214	0.607425	0.392575	0.217786	0.268785	0.328665	3.12	0.999338	1996.1	2127.6	782.04	592.38	1209.86
PCC	Standard Pearson	PCC	65535		ü	46	0.402447	0.389715	0.396029	0.755711	0.714314	1.03821	1.01885	0.291727	0.291727	0.54008	0.423864	0.708273	0.694858	0.756146	0.414555	0.607388	0.731362	0.671086	0.781802	0.607914	0.392086	0.218198	0.268638	0.328914	3.12	0.999338	1997.2	2126.46	781.06	593.52	1210.84
PCC	Standard Pearson	PCC	65535		ü	45	0.402376	0.389617	0.395943	0.755697	0.714187	1.03775	1.01863	0.291761	0.291761	0.540109	0.423903	0.708239	0.694808	0.756132	0.414592	0.607372	0.731301	0.671075	0.781836	0.607781	0.392219	0.218164	0.268699	0.328925	3.12	0.999338	1997.38	2126.56	781.32	593.42	1210.58
PCC	Standard Pearson	PCC	65535		ü	9	0.399995	0.385301	0.392578	0.755643	0.72026	1.0433	1.02136	0.293064	0.293064	0.541323	0.419989	0.706936	0.692651	0.756186	0.416414	0.607295	0.72836	0.671635	0.7851	0.600202	0.399798	0.2149	0.27164	0.328365	3.12	0.999338	1978.94	2135.46	796.36	584.52	1195.54
PCC	Standard Pearson	PCC	65535		ü	47	0.401961	0.38938	0.395619	0.755449	0.714611	1.03947	1.01947	0.291947	0.291947	0.540283	0.423894	0.708053	0.69469	0.755876	0.414582	0.60705	0.731321	0.67064	0.781288	0.608092	0.391908	0.218712	0.268679	0.32936	3.12	0.999338	1997.34	2125.06	780.7	594.92	1211.2
PCC	Standard Pearson	PCC	65535		ü	48	0.401849	0.389307	0.395527	0.755396	0.714586	1.03956	1.01951	0.291994	0.291994	0.540325	0.423971	0.708006	0.694653	0.755822	0.414586	0.606983	0.731311	0.670538	0.781185	0.608122	0.391878	0.218815	0.268689	0.329462	3.12	0.999338	1997.7	2124.78	780.64	595.2	1211.26
PCC	Standard Pearson	PCC	65535		ü	49	0.401669	0.389124	0.395345	0.755332	0.714968	1.04087	1.02015	0.292079	0.292079	0.540404	0.423869	0.707921	0.694562	0.755758	0.414634	0.6069	0.731231	0.670438	0.781139	0.607985	0.392015	0.218861	0.268769	0.329562	3.12	0.999338	1997.22	2124.66	780.92	595.32	1210.98
PCC	Standard Pearson	PCC	65535		ü	50	0.401647	0.389173	0.39536	0.755291	0.714895	1.04145	1.02044	0.292083	0.292083	0.54041	0.424085	0.707917	0.694587	0.755714	0.414596	0.606846	0.731295	0.670352	0.780978	0.608196	0.391804	0.219022	0.268705	0.329648	3.12	0.999338	1998.24	2124.22	780.5	595.76	1211.4
PCC	Standard Pearson	PCC	65535		ü	51	0.40129	0.388871	0.39503	0.75513	0.715405	1.04227	1.02084	0.292249	0.292249	0.540565	0.423665	0.707751	0.694435	0.75555	0.414654	0.606635	0.731205	0.670085	0.780737	0.608134	0.391866	0.219263	0.268795	0.329915	3.12	0.999338	1996.26	2123.56	780.62	596.42	1211.28
PCC	Standard Pearson	PCC	65535		ü	52	0.401058	0.388655	0.394807	0.75503	0.715409	1.04294	1.02117	0.292359	0.292359	0.540668	0.423877	0.707641	0.694328	0.75545	0.414704	0.606506	0.731126	0.669932	0.780613	0.608042	0.391958	0.219387	0.268874	0.330068	3.12	0.999338	1997.26	2123.22	780.8	596.76	1211.1
PCC	Standard Pearson	PCC	65535		ü	53	0.400829	0.388477	0.394603	0.754916	0.71566	1.04324	1.02132	0.292465	0.292465	0.540766	0.423678	0.707535	0.694239	0.755334	0.414728	0.60636	0.731083	0.669745	0.78042	0.608058	0.391942	0.21958	0.268917	0.330255	3.12	0.999338	1996.32	2122.7	780.78	597.28	1211.12
PCC	Standard Pearson	PCC	65535		ü	54	0.40059	0.388295	0.394393	0.754802	0.715927	1.04407	1.02172	0.292571	0.292571	0.540863	0.423606	0.707429	0.694147	0.755216	0.414754	0.606213	0.731042	0.669548	0.78022	0.608075	0.391925	0.21978	0.268958	0.330452	3.12	0.999338	1995.98	2122.16	780.74	597.82	1211.16
PCC	Standard Pearson	PCC	65535		ü	57	0.40028	0.387903	0.394041	0.75472	0.716232	1.04566	1.0225	0.292724	0.292724	0.541005	0.42372	0.707276	0.693952	0.755138	0.414886	0.606107	0.73083	0.66945	0.780284	0.607619	0.392381	0.219716	0.26917	0.33055	3.12	0.999338	1996.52	2122.34	781.64	597.64	1210.26
PCC	Standard Pearson	PCC	65535		ü	55	0.400305	0.387985	0.394095	0.754702	0.716058	1.04454	1.02195	0.292711	0.292711	0.540991	0.423563	0.707289	0.693992	0.755119	0.414843	0.606085	0.730899	0.669406	0.780172	0.607813	0.392187	0.219828	0.269101	0.330594	3.12	0.999338	1995.78	2122.02	781.26	597.96	1210.64
PCC	Standard Pearson	PCC	65535		ü	60	0.400234	0.387929	0.394032	0.754674	0.716551	1.04711	1.02321	0.292741	0.292741	0.541024	0.423682	0.707259	0.693964	0.75509	0.414856	0.606045	0.730879	0.669355	0.780132	0.607797	0.392203	0.219868	0.269121	0.330645	3.12	0.999338	1996.34	2121.92	781.3	598.06	1210.6
PCC	Standard Pearson	PCC	65535		ü	58	0.400105	0.387751	0.393878	0.754648	0.716292	1.04605	1.02269	0.292805	0.292805	0.541082	0.423741	0.707195	0.693876	0.755065	0.41492	0.606012	0.730776	0.669328	0.78019	0.607561	0.392439	0.21981	0.269224	0.330672	3.12	0.999338	1996.62	2122.08	781.76	597.9	1210.14
PCC	Standard Pearson	PCC	65535		ü	56	0.400069	0.38777	0.39387	0.754607	0.716368	1.04543	1.02239	0.292817	0.292817	0.541092	0.423474	0.707183	0.693885	0.755022	0.414891	0.605961	0.730823	0.669246	0.780051	0.607719	0.392281	0.219949	0.269177	0.330754	3.12	0.999338	1995.36	2121.7	781.44	598.28	1210.46
PCC	Standard Pearson	PCC	65535		ü	59	0.399926	0.387573	0.3937	0.754578	0.716585	1.04715	1.02323	0.29289	0.29289	0.541161	0.423657	0.70711	0.693787	0.754996	0.414963	0.605922	0.730706	0.66922	0.780123	0.60745	0.39255	0.219877	0.269294	0.33078	3.12	0.999338	1996.22	2121.9	781.98	598.08	1209.92
PCC	Standard Pearson	PCC	65535		ü	61	0.399997	0.387716	0.393807	0.754571	0.716831	1.04809	1.02368	0.292851	0.292851	0.541124	0.423669	0.707149	0.693858	0.754985	0.414898	0.605913	0.73081	0.669188	0.779991	0.607725	0.392275	0.220009	0.26919	0.330812	3.12	0.999338	1996.28	2121.54	781.44	598.44	1210.46
PCC	Standard Pearson	PCC	65535		ü	62	0.399853	0.387551	0.393653	0.754529	0.717035	1.04843	1.02385	0.292919	0.292919	0.541188	0.423504	0.707081	0.693776	0.754945	0.414948	0.605857	0.73073	0.669123	0.779991	0.60756	0.39244	0.220009	0.26927	0.330877	3.12	0.999338	1995.5	2121.54	781.76	598.44	1210.14
PCC	Standard Pearson	PCC	65535		ü	63	0.39981	0.387554	0.393633	0.754491	0.717255	1.04917	1.02422	0.292936	0.292936	0.541203	0.423478	0.707064	0.693777	0.754904	0.414931	0.605809	0.730759	0.669051	0.779875	0.607679	0.392321	0.220125	0.269241	0.330949	3.12	0.999338	1995.38	2121.22	781.52	598.76	1210.38
PCC	Standard Pearson	PCC	65535		ü	68	0.399839	0.387647	0.393694	0.75447	0.718011	1.05198	1.02558	0.292919	0.292919	0.541186	0.423389	0.707081	0.693823	0.754881	0.414879	0.605783	0.73084	0.668999	0.779743	0.607904	0.392096	0.220257	0.26916	0.331001	3.12	0.999338	1994.96	2120.86	781.08	599.12	1210.82
PCC	Standard Pearson	PCC	65535		ü	64	0.399791	0.387562	0.393628	0.754466	0.71748	1.04967	1.02446	0.292945	0.292945	0.54121	0.423364	0.707055	0.693781	0.754878	0.414916	0.605779	0.73078	0.669011	0.779799	0.607763	0.392237	0.220201	0.26922	0.330989	3.12	0.999338	1994.84	2121.02	781.36	598.96	1210.54
PCC	Standard Pearson	PCC	65535		ü	65	0.39974	0.387539	0.393591	0.754437	0.717778	1.05048	1.02485	0.292966	0.292966	0.54123	0.423228	0.707034	0.69377	0.754847	0.414912	0.60574	0.730788	0.668952	0.779728	0.607811	0.392189	0.220272	0.269212	0.331048	3.12	0.999338	1994.2	2120.82	781.26	599.16	1210.64
PCC	Standard Pearson	PCC	65535		ü	70	0.399618	0.387428	0.393474	0.754389	0.718584	1.05332	1.02624	0.293021	0.293021	0.54128	0.42305	0.706979	0.693714	0.754799	0.414931	0.605679	0.730753	0.668865	0.779667	0.607761	0.392239	0.220333	0.269247	0.331135	3.12	0.999338	1993.36	2120.66	781.36	599.32	1210.54
PCC	Standard Pearson	PCC	65535		ü	69	0.399632	0.387474	0.393504	0.754379	0.718376	1.05261	1.02589	0.293013	0.293013	0.541272	0.423126	0.706987	0.693737	0.754787	0.414909	0.605665	0.73079	0.668842	0.779602	0.607871	0.392129	0.220398	0.26921	0.331158	3.12	0.999338	1993.72	2120.48	781.14	599.5	1210.76
PCC	Standard Pearson	PCC	65535		ü	67	0.399602	0.387441	0.393473	0.75437	0.7181	1.05168	1.02544	0.293025	0.293025	0.541285	0.423194	0.706975	0.69372	0.754778	0.414923	0.605653	0.730771	0.668831	0.779601	0.60784	0.39216	0.220399	0.269229	0.331169	3.12	0.999338	1994.04	2120.48	781.2	599.5	1210.7
PCC	Standard Pearson	PCC	65535		ü	66	0.399621	0.387477	0.393501	0.754365	0.718151	1.0514	1.02531	0.293017	0.293017	0.541279	0.423067	0.706983	0.693739	0.754772	0.414906	0.605644	0.730801	0.66882	0.779559	0.607919	0.392081	0.220441	0.269199	0.33118	3.12	0.999338	1993.44	2120.36	781.04	599.62	1210.86
PCC	Standard Pearson	PCC	65535		ü	71	0.399575	0.387479	0.393479	0.754327	0.718792	1.05382	1.02648	0.293034	0.293034	0.541293	0.42291	0.706966	0.69374	0.754732	0.414885	0.605597	0.730833	0.668742	0.779441	0.608039	0.391961	0.220559	0.269167	0.331258	3.12	0.999338	1992.7	2120.04	780.8	599.94	1211.1
PCC	Standard Pearson	PCC	65535		ü	72	0.399382	0.387347	0.393317	0.754227	0.719047	1.05391	1.02653	0.293119	0.293119	0.54137	0.422617	0.706881	0.693674	0.754628	0.414896	0.60547	0.730813	0.668569	0.779247	0.6081	0.3919	0.220753	0.269187	0.331431	3.12	0.999338	1991.32	2119.52	780.68	600.46	1211.22
PCC	Standard Pearson	PCC	65535		ü	8	0.396032	0.381328	0.388609	0.754158	0.724441	1.05132	1.02528	0.294944	0.294944	0.543052	0.417447	0.705056	0.690664	0.75471	0.417423	0.605382	0.72671	0.669322	0.783816	0.597512	0.402488	0.216184	0.27329	0.330678	3.12	0.999338	1966.96	2131.96	801.72	588.02	1190.18
PCC	Standard Pearson	PCC	65535		ü	73	0.399087	0.386984	0.392987	0.754142	0.719535	1.05546	1.02728	0.293267	0.293267	0.541507	0.422472	0.706733	0.693492	0.754548	0.415014	0.60536	0.730622	0.668465	0.779286	0.607697	0.392303	0.220714	0.269378	0.331535	3.12	0.999338	1990.64	2119.62	781.48	600.36	1210.42
PCC	Standard Pearson	PCC	65535		ü	75	0.398568	0.386477	0.392474	0.753941	0.720277	1.05785	1.02844	0.293509	0.293509	0.54173	0.422281	0.706491	0.693238	0.754347	0.415139	0.605102	0.73042	0.668148	0.779085	0.607392	0.392608	0.220915	0.26958	0.331852	3.12	0.999338	1989.74	2119.08	782.08	600.9	1209.82
PCC	Standard Pearson	PCC	65535		ü	74	0.398309	0.386204	0.392208	0.753849	0.720324	1.05725	1.02815	0.293636	0.293636	0.541849	0.422052	0.706364	0.693102	0.754256	0.415216	0.604981	0.730297	0.668013	0.779031	0.607173	0.392827	0.220969	0.269703	0.331987	3.12	0.999338	1988.66	2118.92	782.52	601.06	1209.38
PCC	Standard Pearson	PCC	65535		ü	76	0.398088	0.386005	0.391999	0.75375	0.720778	1.05923	1.02911	0.293738	0.293738	0.541941	0.422048	0.706262	0.693003	0.754156	0.415256	0.604857	0.73023	0.667858	0.778894	0.607111	0.392889	0.221106	0.26977	0.332142	3.12	0.999338	1988.64	2118.56	782.64	601.42	1209.26
PCC	Standard Pearson	PCC	65535		ü	77	0.397931	0.385886	0.391861	0.753671	0.720969	1.05962	1.0293	0.293811	0.293811	0.542007	0.421946	0.706189	0.692943	0.754075	0.415272	0.604756	0.730204	0.667727	0.778755	0.607131	0.392869	0.221245	0.269796	0.332273	3.12	0.999338	1988.16	2118.18	782.6	601.8	1209.3
PCC	Standard Pearson	PCC	65535		ü	78	0.397522	0.385602	0.391515	0.753459	0.721407	1.06075	1.02984	0.293993	0.293993	0.542175	0.421747	0.706007	0.692801	0.753856	0.415294	0.604482	0.730167	0.667355	0.778342	0.60726	0.39274	0.221658	0.269833	0.332645	3.12	0.999338	1987.22	2117.06	782.34	602.92	1209.56
PCC	Standard Pearson	PCC	65535		ü	80	0.397438	0.385511	0.391428	0.75343	0.721695	1.06148	1.0302	0.294036	0.294036	0.542216	0.421568	0.705964	0.692756	0.753829	0.415322	0.604444	0.730121	0.667317	0.778335	0.607176	0.392824	0.221665	0.269879	0.332683	3.12	0.999338	1986.38	2117.04	782.52	602.94	1209.38
PCC	Standard Pearson	PCC	65535		ü	79	0.397437	0.385543	0.391443	0.753416	0.7215	1.06116	1.03004	0.294031	0.294031	0.54221	0.42173	0.705969	0.692771	0.753813	0.415301	0.604428	0.730153	0.667284	0.778267	0.607276	0.392724	0.221733	0.269847	0.332716	3.12	0.999338	1987.14	2116.86	782.32	603.12	1209.58
PCC	Standard Pearson	PCC	65535		ü	81	0.397372	0.385503	0.391391	0.753378	0.72175	1.0615	1.03022	0.294061	0.294061	0.54224	0.421543	0.705939	0.692752	0.753773	0.415303	0.604377	0.730152	0.667219	0.778186	0.607317	0.392683	0.221814	0.269848	0.332781	3.12	0.999338	1986.26	2116.64	782.24	603.34	1209.66
PCC	Standard Pearson	PCC	65535		ü	82	0.397321	0.385503	0.391366	0.753331	0.721708	1.06165	1.03029	0.294082	0.294082	0.542259	0.421653	0.705918	0.692752	0.753725	0.41528	0.604318	0.730189	0.667132	0.778047	0.607456	0.392544	0.221953	0.269811	0.332868	3.12	0.999338	1986.78	2116.26	781.96	603.72	1209.94
PCC	Standard Pearson	PCC	65535		ü	84	0.397356	0.385652	0.391459	0.753283	0.721997	1.06226	1.03058	0.294061	0.294061	0.54224	0.421513	0.705939	0.692826	0.753671	0.415197	0.604255	0.730325	0.667031	0.777793	0.607859	0.392141	0.222207	0.269675	0.332969	3.12	0.999338	1986.12	2115.56	781.16	604.42	1210.74
PCC	Standard Pearson	PCC	65535		ü	86	0.397218	0.385514	0.391321	0.753234	0.722302	1.06347	1.03118	0.294125	0.294125	0.542301	0.4215	0.705875	0.692757	0.753622	0.415236	0.60419	0.730265	0.666954	0.777755	0.607759	0.392241	0.222245	0.269735	0.333046	3.12	0.999338	1986.06	2115.46	781.36	604.52	1210.54
PCC	Standard Pearson	PCC	65535		ü	85	0.397052	0.38538	0.391171	0.753156	0.722162	1.0626	1.03075	0.294201	0.294201	0.542369	0.421403	0.705799	0.69269	0.753543	0.415257	0.604091	0.730228	0.666824	0.77763	0.60775	0.39225	0.22237	0.269772	0.333176	3.12	0.999338	1985.6	2115.12	781.38	604.86	1210.52
PCC	Standard Pearson	PCC	65535		ü	83	0.396896	0.385132	0.390968	0.753141	0.722022	1.06239	1.03064	0.294282	0.294282	0.542443	0.421479	0.705718	0.692566	0.753532	0.415355	0.604072	0.730069	0.666827	0.777777	0.607355	0.392645	0.222223	0.269931	0.333173	3.12	0.999338	1985.96	2115.52	782.16	604.46	1209.74
PCC	Standard Pearson	PCC	65535		ü	92	0.396804	0.385115	0.390915	0.753076	0.723189	1.06642	1.0326	0.294316	0.294316	0.542477	0.421301	0.705684	0.692558	0.753462	0.415334	0.603986	0.730106	0.666699	0.777592	0.607524	0.392476	0.222408	0.269894	0.333301	3.12	0.999338	1985.12	2115.02	781.82	604.96	1210.08
PCC	Standard Pearson	PCC	65535		ü	88	0.396763	0.385079	0.390876	0.753056	0.722795	1.06499	1.03191	0.294337	0.294337	0.542496	0.421309	0.705663	0.69254	0.753443	0.41534	0.60396	0.730096	0.666667	0.777564	0.607516	0.392484	0.222436	0.269904	0.333333	3.12	0.999338	1985.16	2114.94	781.84	605.04	1210.06
PCC	Standard Pearson	PCC	65535		ü	90	0.396709	0.385016	0.390818	0.753039	0.723032	1.06577	1.03229	0.294362	0.294362	0.54252	0.421271	0.705638	0.692508	0.753426	0.41536	0.603938	0.730064	0.666646	0.777563	0.607454	0.392546	0.222437	0.269936	0.333354	3.12	0.999338	1984.98	2114.94	781.96	605.04	1209.94
PCC	Standard Pearson	PCC	65535		ü	89	0.396684	0.384978	0.390786	0.753038	0.723096	1.06579	1.0323	0.294375	0.294375	0.542531	0.421165	0.705625	0.692489	0.753426	0.415375	0.603938	0.730037	0.666647	0.777592	0.607386	0.392614	0.222408	0.269963	0.333353	3.12	0.999338	1984.48	2115.02	782.1	604.96	1209.8
PCC	Standard Pearson	PCC	65535		ü	91	0.396756	0.385114	0.39089	0.753033	0.723032	1.06589	1.03234	0.294337	0.294337	0.542496	0.421322	0.705663	0.692557	0.753418	0.415315	0.603931	0.730136	0.666619	0.777468	0.607646	0.392354	0.222532	0.269864	0.333381	3.12	0.999338	1985.22	2114.68	781.58	605.3	1210.32
PCC	Standard Pearson	PCC	65535		ü	87	0.396671	0.384966	0.390773	0.753027	0.722744	1.0647	1.03177	0.294384	0.294384	0.54254	0.421297	0.705616	0.692483	0.753415	0.415377	0.603923	0.730036	0.666635	0.777571	0.607395	0.392605	0.222429	0.269964	0.333365	3.12	0.999338	1985.1	2114.96	782.08	605.02	1209.82
PCC	Standard Pearson	PCC	65535		ü	93	0.396528	0.384859	0.390649	0.752958	0.723317	1.06695	1.03286	0.294447	0.294447	0.542597	0.42128	0.705553	0.692429	0.753344	0.415391	0.603835	0.730014	0.666514	0.777447	0.607411	0.392589	0.222553	0.269986	0.333486	3.12	0.999338	1985.02	2114.62	782.04	605.36	1209.86
PCC	Standard Pearson	PCC	65535		ü	94	0.39637	0.384683	0.390481	0.752906	0.723546	1.06763	1.03319	0.294524	0.294524	0.542668	0.421169	0.705476	0.692341	0.753294	0.415442	0.603768	0.72993	0.66644	0.777432	0.607251	0.392749	0.222568	0.27007	0.33356	3.12	0.999338	1984.5	2114.58	782.36	605.4	1209.54
PCC	Standard Pearson	PCC	65535		ü	95	0.396214	0.384513	0.390318	0.752853	0.723767	1.06824	1.03348	0.2946	0.2946	0.542739	0.421072	0.7054	0.692256	0.753242	0.415491	0.603699	0.729851	0.666363	0.777411	0.607102	0.392898	0.222589	0.270149	0.333637	3.12	0.999338	1984.04	2114.52	782.66	605.46	1209.24
PCC	Standard Pearson	PCC	65535		ü	100	0.396066	0.384329	0.390152	0.752813	0.724603	1.07118	1.0349	0.294672	0.294672	0.5428	0.420868	0.705328	0.692165	0.753203	0.415551	0.603652	0.729749	0.666316	0.777437	0.606893	0.393107	0.222563	0.270251	0.333684	3.12	0.999338	1983.08	2114.6	783.08	605.38	1208.82
PCC	Standard Pearson	PCC	65535		ü	96	0.396041	0.384347	0.390149	0.752784	0.724251	1.06943	1.03406	0.294681	0.294681	0.542812	0.420825	0.705319	0.692173	0.753173	0.415531	0.603612	0.729786	0.666255	0.777336	0.607011	0.392989	0.222664	0.270214	0.333745	3.12	0.999338	1982.88	2114.32	782.84	605.66	1209.06
PCC	Standard Pearson	PCC	65535		ü	99	0.395961	0.384214	0.390042	0.752776	0.724459	1.07076	1.0347	0.294723	0.294723	0.542849	0.420906	0.705277	0.692107	0.753167	0.415586	0.603604	0.729695	0.666266	0.777422	0.606792	0.393208	0.222578	0.270305	0.333734	3.12	0.999338	1983.26	2114.56	783.28	605.42	1208.62
[truncated: 313 more rows]

## Sheet: bncML100K
brief file_supplementary#1.a.2: best neighbor counts title Experimental Interpretation of Adequate Weight-Metric Combination for Dynamic User-Based Collaborative Filtering authors @savasokyay, @sercanaygun testname CF_nIOI_sw version v2.2.15 (plus, some non-technical and textual enhancements from the current version v3.3) dataset ML100K rsltInfo The mean results of multiple test runs are computed…
[truncated: 17 more rows]

[truncated: 2 more sheets: ML1M, bncML1M]
